# Supplementary material for: Universal adaptive evolution strategy of probiotic Lactobacillus plantarum to gut selection pressure from humans, mice and zebrafish
Source: Research Square preprint supplement (doi:10.21203/rs.3.rs-106737/v1), 2021-03-10
Supplement: Supplementary file 1 [file 9d67b420e5716548e8b4723e.xlsx]

## Sheet: Legends
Tables	Legend
Table S1	Isolates and sample information
Table S2	SNP profile with detailed information
Table S3	The paralla evolutionary genes
Table S4	ANI profile
Table S5	Mobile elements related to HNU082
Table S6	Intestinal microbial taxonomy profile
Table S7	Intestinal microbial metabolic pathway profile
Table S8	SNP annotated in indegous microbes
Table S9	SNP annotation of HNU082 correlated intestinal microbes

## Sheet: Table S1
Three typical model	ORIGINAL_ID	Project_ID	MODEL	TIME	Sequencing		ORIGINAL_ID	Sample_ID	Model	Time_point	Host_ID	Group	Sequencing
	H1	1H1A	Human	Day 3	Whole Genome Sequencing		H1-1	HA1	Human	Day 0	H01	Probiotic	Shotgun metagenomic sequencing
	H3	1H3A	Human	Day 3	Whole Genome Sequencing		H1-2	HA2	Human	Day 0	H02	Probiotic	Shotgun metagenomic sequencing
	H6	1H6B	Human	Day 7	Whole Genome Sequencing		H1-3	HA3	Human	Day 0	H03	Probiotic	Shotgun metagenomic sequencing
	H8	1H8B	Human	Day 7	Whole Genome Sequencing		H1-4	HA4	Human	Day 0	H04	Probiotic	Shotgun metagenomic sequencing
	H9	1H9B	Human	Day 7	Whole Genome Sequencing		H1-5	HA5	Human	Day 0	H05	Probiotic	Shotgun metagenomic sequencing
	H11	1H11B	Human	Day 7	Whole Genome Sequencing		H1-6	HA6	Human	Day 0	H06	Probiotic	Shotgun metagenomic sequencing
	H12	1H12C	Human	Day 14	Whole Genome Sequencing		H1-7	HA7	Human	Day 0	H07	Probiotic	Shotgun metagenomic sequencing
	H13	1H13C	Human	Day 14	Whole Genome Sequencing		H2-1	HB1	Human	Day 3	H01	Probiotic	Shotgun metagenomic sequencing
	H15	1H15C	Human	Day 14	Whole Genome Sequencing		H2-2	HB2	Human	Day 3	H02	Probiotic	Shotgun metagenomic sequencing
	H18	1H18D	Human	Day 21	Whole Genome Sequencing		H2-3	HB3	Human	Day 3	H03	Probiotic	Shotgun metagenomic sequencing
	H20	1H20D	Human	Day 21	Whole Genome Sequencing		H2-4	HB4	Human	Day 3	H04	Probiotic	Shotgun metagenomic sequencing
	H25	1H25E	Human	Day 28	Whole Genome Sequencing		H2-5	HB5	Human	Day 3	H05	Probiotic	Shotgun metagenomic sequencing
	H27	1H27E	Human	Day 28	Whole Genome Sequencing		H2-6	HB6	Human	Day 3	H06	Probiotic	Shotgun metagenomic sequencing
	H28	1H28E	Human	Day 28	Whole Genome Sequencing		H2-7	HB7	Human	Day 3	H07	Probiotic	Shotgun metagenomic sequencing
	H29	1H29E	Human	Day 28	Whole Genome Sequencing		H3-1	HC1	Human	Day 7	H01	Probiotic	Shotgun metagenomic sequencing
	H31	2H31A	Human	Day 3	Whole Genome Sequencing		H3-2	HC2	Human	Day 7	H02	Probiotic	Shotgun metagenomic sequencing
	H33	2H33A	Human	Day 3	Whole Genome Sequencing		H3-3	HC3	Human	Day 7	H03	Probiotic	Shotgun metagenomic sequencing
	H44	2H44B	Human	Day 7	Whole Genome Sequencing		H3-4	HC4	Human	Day 7	H04	Probiotic	Shotgun metagenomic sequencing
	H45	2H45B	Human	Day 7	Whole Genome Sequencing		H3-5	HC5	Human	Day 7	H05	Probiotic	Shotgun metagenomic sequencing
	H47	2H47B	Human	Day 7	Whole Genome Sequencing		H3-6	HC6	Human	Day 7	H06	Probiotic	Shotgun metagenomic sequencing
	H50	2H50C	Human	Day 14	Whole Genome Sequencing		H3-7	HC7	Human	Day 7	H07	Probiotic	Shotgun metagenomic sequencing
	H51	2H51C	Human	Day 14	Whole Genome Sequencing		H4-1	HD1	Human	Day 14	H01	Probiotic	Shotgun metagenomic sequencing
	H52	2H52C	Human	Day 14	Whole Genome Sequencing		H4-2	HD2	Human	Day 14	H02	Probiotic	Shotgun metagenomic sequencing
	H63	3H63A	Human	Day 3	Whole Genome Sequencing		H4-3	HD3	Human	Day 14	H03	Probiotic	Shotgun metagenomic sequencing
	H66	3H66A	Human	Day 3	Whole Genome Sequencing		H4-4	HD4	Human	Day 14	H04	Probiotic	Shotgun metagenomic sequencing
	H67	3H67A	Human	Day 3	Whole Genome Sequencing		H4-5	HD5	Human	Day 14	H05	Probiotic	Shotgun metagenomic sequencing
	H68	3H68A	Human	Day 3	Whole Genome Sequencing		H4-6	HD6	Human	Day 14	H06	Probiotic	Shotgun metagenomic sequencing
	H69	3H69C	Human	Day 14	Whole Genome Sequencing		H4-7	HD7	Human	Day 14	H07	Probiotic	Shotgun metagenomic sequencing
	H72	3H72C	Human	Day 14	Whole Genome Sequencing		H5-1	HE1	Human	Day 21	H01	Probiotic	Shotgun metagenomic sequencing
	H73	3H73D	Human	Day 21	Whole Genome Sequencing		H5-2	HE2	Human	Day 21	H02	Probiotic	Shotgun metagenomic sequencing
	H79	3H79D	Human	Day 21	Whole Genome Sequencing		H5-3	HE3	Human	Day 21	H03	Probiotic	Shotgun metagenomic sequencing
	H84	3H84E	Human	Day 28	Whole Genome Sequencing		H5-4	HE4	Human	Day 21	H04	Probiotic	Shotgun metagenomic sequencing
	H85	3H85E	Human	Day 28	Whole Genome Sequencing		H5-5	HE5	Human	Day 21	H05	Probiotic	Shotgun metagenomic sequencing
	H93	4H93B	Human	Day 7	Whole Genome Sequencing		H5-6	HE6	Human	Day 21	H06	Probiotic	Shotgun metagenomic sequencing
	H96	4H96B	Human	Day 7	Whole Genome Sequencing		H5-7	HE7	Human	Day 21	H07	Probiotic	Shotgun metagenomic sequencing
	H97	4H97C	Human	Day 14	Whole Genome Sequencing		H6-1	HF1	Human	Day 28	H01	Probiotic	Shotgun metagenomic sequencing
	H100	4H100D	Human	Day 21	Whole Genome Sequencing		H6-2	HF2	Human	Day 28	H02	Probiotic	Shotgun metagenomic sequencing
	H101	4H101D	Human	Day 21	Whole Genome Sequencing		H6-3	HF3	Human	Day 28	H03	Probiotic	Shotgun metagenomic sequencing
	H102	4H102D	Human	Day 21	Whole Genome Sequencing		H6-4	HF4	Human	Day 28	H04	Probiotic	Shotgun metagenomic sequencing
	H103	4H103D	Human	Day 21	Whole Genome Sequencing		H6-5	HF5	Human	Day 28	H05	Probiotic	Shotgun metagenomic sequencing
	H105	4H105E	Human	Day 28	Whole Genome Sequencing		H6-6	HF6	Human	Day 28	H06	Probiotic	Shotgun metagenomic sequencing
	H113	5H113B	Human	Day 7	Whole Genome Sequencing		H6-7	HF7	Human	Day 28	H07	Probiotic	Shotgun metagenomic sequencing
	H115	5H115B	Human	Day 7	Whole Genome Sequencing		VA1	VA1	Human	Day 0	H08	Placebo	Shotgun metagenomic sequencing
	H117	5H117C	Human	Day 14	Whole Genome Sequencing		VA2	VA2	Human	Day 0	H09	Placebo	Shotgun metagenomic sequencing
	H119	5H119C	Human	Day 14	Whole Genome Sequencing		VA3	VA3	Human	Day 0	H10	Placebo	Shotgun metagenomic sequencing
	H124	5H124D	Human	Day 21	Whole Genome Sequencing		VA4	VA4	Human	Day 0	H11	Placebo	Shotgun metagenomic sequencing
	H125	5H125D	Human	Day 21	Whole Genome Sequencing		VA5	VA5	Human	Day 0	H12	Placebo	Shotgun metagenomic sequencing
	H128	5H128D	Human	Day 21	Whole Genome Sequencing		VD1	VD1	Human	Day 14	H08	Placebo	Shotgun metagenomic sequencing
	H131	5H131D	Human	Day 21	Whole Genome Sequencing		VD2	VD2	Human	Day 14	H09	Placebo	Shotgun metagenomic sequencing
	H132	5H132E	Human	Day 28	Whole Genome Sequencing		VD3	VD3	Human	Day 14	H10	Placebo	Shotgun metagenomic sequencing
	H133	5H133E	Human	Day 28	Whole Genome Sequencing		VD4	VD4	Human	Day 14	H11	Placebo	Shotgun metagenomic sequencing
	H135	5H135E	Human	Day 28	Whole Genome Sequencing		VD5	VD5	Human	Day 14	H12	Placebo	Shotgun metagenomic sequencing
	H137	5H137E	Human	Day 28	Whole Genome Sequencing		VF1	VF1	Human	Day 28	H08	Placebo	Shotgun metagenomic sequencing
	H138	6H138A	Human	Day 3	Whole Genome Sequencing		VF2	VF2	Human	Day 28	H09	Placebo	Shotgun metagenomic sequencing
	H141	6H141A	Human	Day 3	Whole Genome Sequencing		VF3	VF3	Human	Day 28	H10	Placebo	Shotgun metagenomic sequencing
	H145	6H145B	Human	Day 7	Whole Genome Sequencing		VF4	VF4	Human	Day 28	H11	Placebo	Shotgun metagenomic sequencing
	H146	6H146B	Human	Day 7	Whole Genome Sequencing		VF5	VF5	Human	Day 28	H12	Placebo	Shotgun metagenomic sequencing
	H147	6H147C	Human	Day 14	Whole Genome Sequencing		M1-1	MA1	Mouse	Day 0	M01	Probiotic	Shotgun metagenomic sequencing
	H148	6H148C	Human	Day 14	Whole Genome Sequencing		M1-2	MA2	Mouse	Day 0	M02	Probiotic	Shotgun metagenomic sequencing
	H149	6H149C	Human	Day 14	Whole Genome Sequencing		M1-3	MA3	Mouse	Day 0	M03	Probiotic	Shotgun metagenomic sequencing
	H150	6H150C	Human	Day 14	Whole Genome Sequencing		M1-4	MA4	Mouse	Day 0	M04	Probiotic	Shotgun metagenomic sequencing
	H151	6H151C	Human	Day 14	Whole Genome Sequencing		M1-5	MA5	Mouse	Day 0	M05	Probiotic	Shotgun metagenomic sequencing
	H157	6H157D	Human	Day 21	Whole Genome Sequencing		M1-6	MA6	Mouse	Day 0	M06	Probiotic	Shotgun metagenomic sequencing
	H159	6H159D	Human	Day 21	Whole Genome Sequencing		M2-1	MB1	Mouse	Day 3	M01	Probiotic	Shotgun metagenomic sequencing
	H162	6H162E	Human	Day 28	Whole Genome Sequencing		M2-2	MB2	Mouse	Day 3	M02	Probiotic	Shotgun metagenomic sequencing
	H163	7H163A	Human	Day 3	Whole Genome Sequencing		M2-3	MB3	Mouse	Day 3	M03	Probiotic	Shotgun metagenomic sequencing
	H165	7H165A	Human	Day 3	Whole Genome Sequencing		M2-4	MB4	Mouse	Day 3	M04	Probiotic	Shotgun metagenomic sequencing
	H167	7H167B	Human	Day 7	Whole Genome Sequencing		M2-5	MB5	Mouse	Day 3	M05	Probiotic	Shotgun metagenomic sequencing
	H170	7H170B	Human	Day 7	Whole Genome Sequencing		M2-6	MB6	Mouse	Day 3	M06	Probiotic	Shotgun metagenomic sequencing
	H172	7H172B	Human	Day 7	Whole Genome Sequencing		M3-1	MC1	Mouse	Day 7	M01	Probiotic	Shotgun metagenomic sequencing
	H175	7H175B	Human	Day 7	Whole Genome Sequencing		M3-2	MC2	Mouse	Day 7	M02	Probiotic	Shotgun metagenomic sequencing
	H188	7H188C	Human	Day 14	Whole Genome Sequencing		M3-3	MC3	Mouse	Day 7	M03	Probiotic	Shotgun metagenomic sequencing
	H192	7H192C	Human	Day 14	Whole Genome Sequencing		M3-4	MC4	Mouse	Day 7	M04	Probiotic	Shotgun metagenomic sequencing
	H193	7H193D	Human	Day 21	Whole Genome Sequencing		M3-5	MC5	Mouse	Day 7	M05	Probiotic	Shotgun metagenomic sequencing
	H202	7H202E	Human	Day 28	Whole Genome Sequencing		M3-6	MC6	Mouse	Day 7	M06	Probiotic	Shotgun metagenomic sequencing
	H203	7H203E	Human	Day 28	Whole Genome Sequencing		M4-1	MD1	Mouse	Day 14	M01	Probiotic	Shotgun metagenomic sequencing
	H204	7H204E	Human	Day 28	Whole Genome Sequencing		M4-2	MD2	Mouse	Day 14	M02	Probiotic	Shotgun metagenomic sequencing
	M1	M1B	Mouse	Day 7	Whole Genome Sequencing		M4-3	MD3	Mouse	Day 14	M03	Probiotic	Shotgun metagenomic sequencing
	M2	M2B	Mouse	Day 7	Whole Genome Sequencing		M4-4	MD4	Mouse	Day 14	M04	Probiotic	Shotgun metagenomic sequencing
	M3	M3C	Mouse	Day 14	Whole Genome Sequencing		M4-5	MD5	Mouse	Day 14	M05	Probiotic	Shotgun metagenomic sequencing
	M4	M4C	Mouse	Day 14	Whole Genome Sequencing		M4-6	MD6	Mouse	Day 14	M06	Probiotic	Shotgun metagenomic sequencing
	M5	M5C	Mouse	Day 14	Whole Genome Sequencing		M5-1	ME1	Mouse	Day 21	M01	Probiotic	Shotgun metagenomic sequencing
	M8	M8C	Mouse	Day 14	Whole Genome Sequencing		M5-2	ME2	Mouse	Day 21	M02	Probiotic	Shotgun metagenomic sequencing
	M10	M10C	Mouse	Day 14	Whole Genome Sequencing		M5-3	ME3	Mouse	Day 21	M03	Probiotic	Shotgun metagenomic sequencing
	M11	M11C	Mouse	Day 14	Whole Genome Sequencing		M5-4	ME4	Mouse	Day 21	M04	Probiotic	Shotgun metagenomic sequencing
	M14	M14C	Mouse	Day 14	Whole Genome Sequencing		M5-5	ME5	Mouse	Day 21	M05	Probiotic	Shotgun metagenomic sequencing
	M15	M15C	Mouse	Day 14	Whole Genome Sequencing		M5-6	ME6	Mouse	Day 21	M06	Probiotic	Shotgun metagenomic sequencing
	M18	M18C	Mouse	Day 14	Whole Genome Sequencing		M6-1	MF1	Mouse	Day 28	M01	Probiotic	Shotgun metagenomic sequencing
	M25	M25A	Mouse	Day 3	Whole Genome Sequencing		M6-2	MF2	Mouse	Day 28	M02	Probiotic	Shotgun metagenomic sequencing
	M28	M28A	Mouse	Day 3	Whole Genome Sequencing		M6-3	MF3	Mouse	Day 28	M03	Probiotic	Shotgun metagenomic sequencing
	M33	M33B	Mouse	Day 7	Whole Genome Sequencing		M6-4	MF4	Mouse	Day 28	M04	Probiotic	Shotgun metagenomic sequencing
	M35	M35B	Mouse	Day 7	Whole Genome Sequencing		M6-5	MF5	Mouse	Day 28	M05	Probiotic	Shotgun metagenomic sequencing
	M38	M38D	Mouse	Day 21	Whole Genome Sequencing		M6-6	MF6	Mouse	Day 28	M06	Probiotic	Shotgun metagenomic sequencing
	M43	M43D	Mouse	Day 21	Whole Genome Sequencing		YA1	YA1	Mouse	Day 0	M07	Placebo	Shotgun metagenomic sequencing
	M45	M45D	Mouse	Day 21	Whole Genome Sequencing		YA2	YA2	Mouse	Day 0	M08	Placebo	Shotgun metagenomic sequencing
	M46	M46D	Mouse	Day 21	Whole Genome Sequencing		YA3	YA3	Mouse	Day 0	M09	Placebo	Shotgun metagenomic sequencing
	M47	M47D	Mouse	Day 21	Whole Genome Sequencing		YA4	YA4	Mouse	Day 0	M10	Placebo	Shotgun metagenomic sequencing
	M50	M50E	Mouse	Day 28	Whole Genome Sequencing		YA5	YA5	Mouse	Day 0	M11	Placebo	Shotgun metagenomic sequencing
	M52	M52E	Mouse	Day 28	Whole Genome Sequencing		YD1	YD1	Mouse	Day 14	M07	Placebo	Shotgun metagenomic sequencing
	M53	M53E	Mouse	Day 28	Whole Genome Sequencing		YD2	YD2	Mouse	Day 14	M08	Placebo	Shotgun metagenomic sequencing
	M54	M54E	Mouse	Day 28	Whole Genome Sequencing		YD3	YD3	Mouse	Day 14	M09	Placebo	Shotgun metagenomic sequencing
	M55	M55E	Mouse	Day 28	Whole Genome Sequencing		YD4	YD4	Mouse	Day 14	M10	Placebo	Shotgun metagenomic sequencing
	Z1	Z1B	Zebrafish	Day 7	Whole Genome Sequencing		YD5	YD5	Mouse	Day 14	M11	Placebo	Shotgun metagenomic sequencing
	Z3	Z3C	Zebrafish	Day 14	Whole Genome Sequencing		YF1	YF1	Mouse	Day 28	M07	Placebo	Shotgun metagenomic sequencing
	Z4	Z4D	Zebrafish	Day 21	Whole Genome Sequencing		YF2	YF2	Mouse	Day 28	M08	Placebo	Shotgun metagenomic sequencing
	Z5	Z5E	Zebrafish	Day 28	Whole Genome Sequencing		YF3	YF3	Mouse	Day 28	M09	Placebo	Shotgun metagenomic sequencing
	Z6	Z6E	Zebrafish	Day 28	Whole Genome Sequencing		YF4	YF4	Mouse	Day 28	M10	Placebo	Shotgun metagenomic sequencing
	Z7	Z7E	Zebrafish	Day 28	Whole Genome Sequencing		YF5	YF5	Mouse	Day 28	M11	Placebo	Shotgun metagenomic sequencing
	Z8	Z8E	Zebrafish	Day 28	Whole Genome Sequencing

## Sheet: Table S2
CHROM	Location	Gene ID	SNP#	Verification	START	END	F/R	Preferred_name	EC number	KEGG KO	CAZy	COG cat	Protein annotation (Prokka)	Type	Amino acid changes	Nucleotide position in the gene	AA position	Mutation Position in AA	Ance-AA	Ance-code	Muta-code	Muta-AA	Ancestor allel	Alternative	1H1A	1H3A	1H6B	1H8B	1H9B	1H11B	1H12C	1H13C	1H15C	1H18D	1H20D	1H25E	1H27E	1H28E	1H29E	2H31A	2H33A	2H44B	2H45B	2H47B	2H50C	2H51C	2H52C	3H63A	3H66A
Scaffold_1_length_3313439	63020	NODE_1_length_3313439_56	SNP01	Yes	62354	63277	-1					L	Transposase and inactivated derivatives, IS30 family DNA replication, recombination, and repair	N	Q86H	258	86	3	Q	CAG	CAT	H	C	A	C	A	C	C	C	C	A	C	A	C	A	C	C	A	C	C	C	C	C	A	A	C	A	C	C
Scaffold_1_length_3313439	695080	NODE_1_length_3313439_658	SNP10	Yes	694500	695402	1	hcaR				K	Hca operon transcriptional activator HcaR, Transcriptional activator of the hca operon for 3-phenylpropionic acid catabolism	N	S194P	581	194	2	S	TCC	CCC	P	T	C	T	T	T	T	T	T	T	T	T	T	T	T	T	T	T	C	C	T	T	T	T	T	T	C	T
Scaffold_1_length_3313439	1283071	NODE_1_length_3313439_1205	SNP22	Yes	1280220	1283627	-1						hypothetical protein	N	L186S	557	186	2	L	TTG	TCG	S	A	G	A	G	G	A	A	G	G	G	G	G	G	G	G	G	G	A	A	A	A	G	G	G	G	A	A
Scaffold_1_length_3313439	1338981	NODE_1_length_3313439_1257	SNP23	Yes	1338855	1340432	-1	ram2	3.2.1.40	ko:K05989		G	Bacterial alpha-L-rhamnosidase 6 hairpin glycosidase domain	N	D484E	1452	484	3	D	GAT	GAG	E	A	C	A	C	C	A	A	C	A	A	C	A	A	A	A	A	A	A	A	A	A	C	A	A	A	A	A
Scaffold_1_length_3313439	1589637	NODE_1_length_3313439_1470	SNP27	Yes	1589395	1592115	-1	trePP	2.4.1.216,2.4.1.8,3.1.3.12,3.2.1.28	ko:K00691,ko:K01087,ko:K01194,ko:K03731	GH37,GH65	G	Glycosyl hydrolase family 65 central catalytic domain, Trehalose 6-phosphate phosphorylase	N	L827M	2479	827	1	L	CTG	ATG	M	G	T	T	G	G	T	T	G	G	G	G	G	G	G	G	G	G	G	G	T	T	G	G	G	G	G	G
Scaffold_1_length_3313439	1590767	NODE_1_length_3313439_1470	SNP28	Yes	1589395	1592115	-1	trePP	2.4.1.216,2.4.1.8,3.1.3.12,3.2.1.28	ko:K00691,ko:K01087,ko:K01194,ko:K03731	GH37,GH65	G	Glycosyl hydrolase family 65 central catalytic domain, Trehalose 6-phosphate phosphorylase	N	D450A	1349	450	2	D	GAT	GCT	A	T	G	T	T	G	T	T	T	T	T	T	T	T	T	T	T	T	T	T	T	T	G	T	T	T	T	T
Scaffold_1_length_3313439	1861048	NODE_1_length_3313439_1717	SNP32	Yes	1860557	1861060	1	yagU		ko:K08996		S	Inner membrane protein YagU response to acidic pH	S	T164T	492	164	3	T	ACT	ACC	T	T	C	T	C	C	T	T	C	C	C	C	C	C	C	C	C	C	T	T	T	T	C	C	C	C	T	T
Scaffold_1_length_3313439	1976363	NA	SNP61	Yes	NA	NA	NA	NA	NA	NA	NA	NA	NA	NA	NA	NA	NA	NA	NA	NA	NA	NA	A	G	A	G	G	A	A	G	G	G	G	G	G	G	G	G	G	A	A	A	A	G	G	G	G	A	A
Scaffold_1_length_3313439	1976367	NA	SNP62	Yes	NA	NA	NA	NA	NA	NA	NA	NA	NA	NA	NA	NA	NA	NA	NA	NA	NA	NA	G	T	G	T	T	G	G	T	G	G	G	G	G	G	G	G	G	G	G	G	G	T	G	G	G	G	G
Scaffold_1_length_3313439	2799363	NODE_1_length_3313439_2601	SNP41	Yes	2798380	2799900	1	spa	3.6.4.13	ko:K03496,ko:K05592		S	Immunoglobulin G-binding protein A, Plays a role in the inhibition of the host innate and adaptive immune responses. Also protected self from phagocytic killing via inhibition of Ig Fc region.	S	E328E	984	328	3	E	GAA	GAG	E	A	G	G	G	G	G	A	G	G	A	G	G	G	G	G	G	G	G	G	G	G	G	G	G	G	G	G
Scaffold_1_length_3313439	2854610	NODE_1_length_3313439_2651	SNP43	Yes	2854006	2855340	1	gor	1.8.1.7	ko:K00383		C	Glutathione reductase, Maintains high levels of reduced glutathione in the cytosol.	N	D202A	605	202	2	D	GAC	GCC	A	A	C	A	C	C	A	A	C	C	C	C	C	C	C	C	C	C	A	A	A	A	C	C	C	C	A	A
Scaffold_1_length_3313439	3007122	NODE_1_length_3313439_2804	SNP46	Yes	3007002	3007931	1	int4		ko:K07482		L	Transposase and inactivated derivatives, IS30 family	N	S41A	121	41	1	S	TCT	GCT	A	T	G	T	T	T	T	T	G	T	T	T	T	T	T	T	T	T	T	T	T	T	T	T	T	T	T	G
Scaffold_1_length_3313439	3007289	NODE_1_length_3313439_2804	SNP47	Yes	3007002	3007931	1	int4		ko:K07482		L	Transposase and inactivated derivatives, IS30 family	S	A96A	288	96	3	A	GCT	GCG	A	T	G	T	G	T	G	T	G	T	G	G	G	T	G	T	T	T	T	G	T	T	G	G	T	T	G	T
Scaffold_1_length_3313439	3212834	NODE_1_length_3313439_3003	SNP50	Yes	3212538	3213281	1	ybhF		ko:K01990,ko:K01992		V	AAA domain, putative AbiEii toxin, Type IV TA system,putative ABC transporter ATP-binding protein YbhF	N	F99L	297	99	3	F	TTT	TTG	L	T	G	T	T	T	G	T	T	T	G	T	T	T	T	T	G	T	T	T	G	G	T	T	T	T	T	T
Scaffold_1_length_3313439	3213000	NODE_1_length_3313439_3003	SNP51	Yes	3212538	3213281	1	ybhF		ko:K01990,ko:K01992		V	AAA domain, putative AbiEii toxin, Type IV TA system,putative ABC transporter ATP-binding protein YbhF	N	V155L	463	155	1	V	GTA	TTA	L	G	T	G	G	G	G	G	G	G	G	G	G	T	T	G	G	G	G	G	G	G	G	G	G	G	G	G
Scaffold_1_length_3313439	3271378	NA	SNP71	Yes	NA	NA	NA	NA	NA	NA	NA	NA	NA	NA	NA	NA	NA	NA	NA	NA	NA	NA	G	T	G	T	T	G	G	T	G	G	G	G	G	G	G	G	G	G	G	G	G	T	G	G	G	G	G
Scaffold_1_length_3313439	3310964	NODE_1_length_3313439_3110	SNP55	Yes	3310848	3311351	-1	tnp2PF3				L	Transposase	N	G130S	388	130	1	G	GGT	AGT	S	C	T	C	C	C	C	C	C	T	T	T	T	T	T	T	T	T	C	C	C	C	C	T	C	T	C	C
Scaffold_1_length_3313439	3311024	NODE_1_length_3313439_3110	SNP56	Yes	3310848	3311351	-1	tnp2PF3				L	Transposase	N	T110A	328	110	1	T	ACT	GCT	A	T	C	T	T	T	T	T	T	C	C	C	C	C	C	C	C	C	T	T	T	T	T	C	T	T	T	T
Scaffold_1_length_3313439	3311155	NODE_1_length_3313439_3110	SNP57	Yes	3310848	3311351	-1	tnp2PF3				L	Transposase	N	V66G	197	66	2	V	GTC	GGC	G	A	C	A	A	A	A	A	A	A	A	A	A	C	A	A	C	A	A	A	A	A	A	C	A	A	A	A
Scaffold_1_length_3313439	3311174	NODE_1_length_3313439_3110	SNP58	Yes	3310848	3311351	-1	tnp2PF3				L	Transposase	N	N60D	178	60	1	N	AAT	GAT	D	T	C	T	T	T	T	T	T	T	T	T	T	T	T	T	T	T	T	T	T	T	T	C	T	T	T	T
Scaffold_1_length_3313439	3311468	NODE_1_length_3313439_3111	SNP59	Yes	3311309	3311647	-1	tnp2PF3				L	Putative transposase of IS4/5 family (DUF4096)	S	S60S	180	60	3	S	AGC	AGT	S	G	A	G	G	G	G	G	G	G	G	G	G	A	A	G	G	A	G	G	G	G	G	G	G	G	G	G
Scaffold_1_length_3313439	3311545	NODE_1_length_3313439_3111	SNP60	Yes	3311309	3311647	-1	tnp2PF3				L	Putative transposase of IS4/5 family (DUF4096)	N	K35E	103	35	1	K	AAG	GAG	E	T	C	T	T	T	T	T	T	T	C	C	C	T	C	T	T	C	T	T	T	T	T	C	T	T	T	T
Scaffold_1_length_3313439	127472	NODE_1_length_3313439_115	SNP02	Negative	127072	128013	-1	csbB	2.4.1.83	ko:K00721,ko:K20534	GT2	M	Glycosyltransferase like family 2	N	Y181C	542	181	2	Y	TAT	TGT	C	T	C	T	T	C	T	T	T	T	T	T	T	T	T	T	T	T	T	T	T	T	T	T	T	T	T	T
Scaffold_1_length_3313439	191507	NODE_1_length_3313439_175	SNP03	Negative	190166	191962	1	aspS	6.1.1.12	ko:K01876		J	Catalyzes the attachment of L-aspartate to tRNA(Asp) in a two-step reaction L-aspartate is first activated by ATP to form Asp-AMP and then transferred to the acceptor end of tRNA(Asp)	N	P448T	1342	448	1	P	CCA	ACA	T	C	A	C	C	C	C	C	C	C	C	C	C	C	C	C	C	C	C	C	C	C	C	C	C	C	C	C
Scaffold_1_length_3313439	195607	NODE_1_length_3313439_179	SNP04	Negative	195298	196194	1	nfo	3.1.21.2	ko:K01151		L	Endonuclease IV plays a role in DNA repair. It cleaves phosphodiester bonds at apurinic or apyrimidinic sites (AP sites) to produce new 5'-ends that are base-free deoxyribose 5-phosphate residues. It preferentially attacks modified AP sites created by bleomycin and neocarzinostatin	N	A104T	310	104	1	A	GCA	ACA	T	G	A	G	G	G	G	G	G	G	G	G	G	G	G	G	G	G	G	G	G	G	G	G	G	G	G	G
Scaffold_1_length_3313439	305947	NODE_1_length_3313439_281	SNP05	Negative	305610	307085	1	emrY				EGP	Multidrug resistance protein 3	N	I113T	338	113	2	I	ATT	ACT	T	T	C	T	T	T	T	T	T	T	T	T	T	T	T	T	T	T	T	T	T	T	T	T	T	T	T	T
Scaffold_1_length_3313439	353961	NODE_1_length_3313439_322	SNP06	Negative	353377	354201	-1	yejC				S	Membrane protein, Acid-resistant	N	V81L	241	81	1	V	GTA	TTA	L	C	A	C	C	C	C	C	C	C	C	C	C	C	C	C	C	C	C	C	C	C	C	C	C	C	C	C
Scaffold_1_length_3313439	397763	NODE_1_length_3313439_371	SNP07	Negative	397278	398231	1	phnT	3.6.3.30	ko:K02010		P	Spermidine/putrescine import ATP-binding protein PotA	N	D162E	486	162	3	D	GAC	GAA	E	C	A	C	C	C	C	C	C	C	C	C	C	C	C	C	C	C	C	C	C	C	C	C	C	C	C	C
Scaffold_1_length_3313439	559566	NODE_1_length_3313439_532	SNP08	Negative	557201	559618	-1	pheT	6.1.1.20	ko:K01890,ko:K06878		J	Belongs to the phenylalanyl-tRNA synthetase beta subunit family. Type 1 subfamily	N	A18G	53	18	2	A	GCC	GGC	G	G	C	G	G	G	G	G	G	G	G	G	G	G	G	G	G	G	G	G	G	G	G	G	G	G	G	G
Scaffold_1_length_3313439	685375	NODE_1_length_3313439_650	SNP09	Negative	684915	687596	1	rutD		ko:K06889		S	Putative aminoacrylate hydrolase RutD, May increase the rate of spontaneous hydrolysis of aminoacrylate to malonic semialdehyde.	N	N154S	461	154	2	N	AAT	AGT	S	A	G	A	A	A	A	A	A	A	A	A	A	A	A	A	A	A	A	A	A	A	A	A	A	A	A	A
Scaffold_1_length_3313439	735542	NODE_1_length_3313439_696	SNP11	Negative	735334	736134	-1	ecfT		ko:K02008,ko:K16783,ko:K16785		U	Transmembrane (T) component of an energy-coupling factor (ECF) ABC-transporter complex. Unlike classic ABC transporters this ECF transporter provides the energy necessary to transport a number of different substrates	N	Q198P	593	198	2	Q	CAA	CCA	P	T	G	T	T	T	T	T	T	T	T	T	T	T	T	T	T	T	T	T	T	T	T	T	T	T	T	T
Scaffold_1_length_3313439	742749	NODE_1_length_3313439_702	SNP12	Negative	742581	743057	1	ynhH				S	NusG domain II, NusG is a regulator of Rho-dependent transcription termination	N	R57*	169	57	1	R	CGA	TGA	*	C	T	C	C	C	C	C	C	C	C	C	C	C	C	C	C	C	C	C	C	C	C	C	C	C	C	C
Scaffold_1_length_3313439	742783	NODE_1_length_3313439_702	SNP13	Negative	742581	743057	1	ynhH				S	NusG domain II, NusG is a regulator of Rho-dependent transcription termination	N	A68D	203	68	2	A	GCC	GAC	D	C	A	C	C	C	C	C	C	C	C	C	C	C	C	C	C	C	C	C	C	C	C	C	C	C	C	C
Scaffold_1_length_3313439	742906	NODE_1_length_3313439_702	SNP14	Negative	742581	743057	1	ynhH				S	NusG domain II, NusG is a regulator of Rho-dependent transcription termination	N	R109P	326	109	2	R	CGC	CCC	P	G	C	G	G	G	G	G	G	G	G	G	G	G	G	G	G	G	G	G	G	G	G	G	G	G	G	G
Scaffold_1_length_3313439	743384	NODE_1_length_3313439_703	SNP15	Negative	743072	743641	1	gerCA	2.5.1.30	ko:K00805		S	Heptaprenyl diphosphate synthase component I, heptaprenyl diphosphate synthase activity	N	Q105*	313	105	1	Q	CAA	TAA	*	C	T	C	C	C	C	C	C	C	C	C	C	C	C	C	C	C	C	C	C	C	C	C	C	C	C	C
Scaffold_1_length_3313439	743549	NODE_1_length_3313439_703	SNP16	Negative	743072	743641	1	gerCA	2.5.1.30	ko:K00805		S	Heptaprenyl diphosphate synthase component I, heptaprenyl diphosphate synthase activity	N	G160*	478	160	1	G	GGA	TGA	*	G	T	G	G	G	G	G	G	G	G	G	G	G	G	G	T	G	G	G	G	G	G	G	G	G	G	G
Scaffold_1_length_3313439	751614	NODE_1_length_3313439_716	SNP17	Negative	751427	751963	-1	rplF		ko:K02933		J	This protein binds to the 23S rRNA, and is important in its secondary structure. It is located near the subunit interface in the base of the L7 L12 stalk, and near the tRNA binding site of the peptidyltransferase center	N	T117M	350	117	2	T	ACG	ATG	M	G	A	G	G	G	G	G	G	G	G	G	G	G	G	G	G	G	G	G	G	G	G	G	G	G	G	G
Scaffold_1_length_3313439	1139803	NODE_1_length_3313439_1057	SNP18	Negative	1125833	1141702	-1	tycC				Q	tyrocidine synthase 3, This protein is involved in the pathway tyrocidine biosynthesis, which is part of Antibiotic biosynthesis	N	Q634*	1900	634	1	Q	CAA	TAA	*	G	A	G	G	G	G	G	G	G	G	G	G	G	G	G	G	G	G	G	G	G	G	G	G	G	G	G
Scaffold_1_length_3313439	1140693	NODE_1_length_3313439_1057	SNP19	Negative	1125833	1141702	-1	tycC				Q	tyrocidine synthase 4, This protein is involved in the pathway tyrocidine biosynthesis, which is part of Antibiotic biosynthesis	N	E337G	1010	337	2	E	GAA	GGA	G	T	C	T	T	T	T	T	T	T	T	T	T	T	T	T	T	T	T	T	T	T	T	T	T	T	T	T
Scaffold_1_length_3313439	1195985	NODE_1_length_3313439_1125	SNP20	Negative	1195695	1196129	-1			ko:K02029,ko:K02030			hypothetical protein	N	A49S	145	49	1	A	GCT	TCT	S	C	A	C	C	C	C	C	C	C	C	C	C	C	C	C	C	C	C	C	C	C	C	C	C	C	C	C
Scaffold_1_length_3313439	1217330	NODE_1_length_3313439_1143	SNP21	Negative	1216747	1219005	1	pflB	2.3.1.54	ko:K00656		C	Formate C-acetyltransferase involve in carbohydrate metabolic process	N	M195T	584	195	2	M	ATG	ACG	T	T	C	T	T	T	T	T	T	T	T	T	T	T	T	T	T	T	T	T	T	T	T	T	T	T	T	T
Scaffold_1_length_3313439	1367998	NODE_1_length_3313439_1279	SNP24	Negative	1367077	1368318	-1	ydiN		ko:K03762		EGP	Inner membrane transport protein,	S	H107H	321	107	3	H	CAC	CAT	H	G	A	G	G	G	G	G	G	G	G	G	G	G	G	G	G	G	G	G	G	G	G	G	G	G	G	G
Scaffold_1_length_3313439	1502465	NODE_1_length_3313439_1396	SNP25	Negative	1502397	1503260	-1	gmuE_2	2.7.1.2,2.7.1.4	ko:K00845,ko:K00847		GK	Putative fructokinase	N	S266G	796	266	1	S	AGT	GGT	G	T	C	T	T	T	T	T	T	T	T	T	T	T	T	T	T	T	T	T	T	T	T	T	T	T	T	T
Scaffold_1_length_3313439	1588285	NODE_1_length_3313439_1468	SNP26	Negative	1587787	1588554	1					S	Putative phosphatase	N	R167S	499	167	1	R	CGT	AGT	S	C	A	C	C	C	C	C	C	C	C	C	C	C	C	C	C	C	C	C	C	C	C	C	C	C	C	C
Scaffold_1_length_3313439	1600973	NODE_1_length_3313439_1479	SNP29	Negative	1598720	1602412	-1	inlJ_1	3.2.1.4,3.2.1.78,3.2.1.8	ko:K01179,ko:K01181,ko:K01218	GH26,GH5,GH9	S	MucBP domain, Internalin-J	N	W480*	1440	480	3	W	TGG	TGA	*	C	T	C	C	C	C	C	C	C	C	C	C	C	C	C	C	C	C	C	C	C	C	C	C	C	C	C
Scaffold_1_length_3313439	1747252	NODE_1_length_3313439_1614	SNP30	Negative	1746223	1747986	1	sdrF		ko:K14192,ko:K14194,ko:K14201		M	Binds to type I collagen via alpha-2(I) or alpha-1(I) chains, although its affinity for the alpha-1(I) chain is significantly higher. Involved in bacterial adherence to transcutaneous drivelines from explanted ventricular assist devices.	N	D344N	1030	344	1	D	GAT	AAT	N	G	A	G	G	G	G	G	G	G	G	G	G	G	G	G	G	G	G	G	G	G	G	G	G	G	G	G
Scaffold_1_length_3313439	1839285	NODE_1_length_3313439_1698	SNP31	Negative	1839023	1839631	1						hypothetical protein	N	L88P	263	88	2	L	CTG	CCG	P	T	C	T	T	T	T	T	T	T	T	T	T	T	T	T	T	T	T	T	T	T	T	T	T	T	T	T
Scaffold_1_length_3313439	1909567	NODE_1_length_3313439_1761	SNP33	Negative	1908907	1909653	-1			ko:K09861		S	Belongs to the UPF0246 family	S	Q29Q	87	29	3	Q	CAG	CAA	Q	C	T	C	C	C	C	C	C	C	C	C	C	C	C	C	C	C	C	C	C	C	C	C	C	C	C	C
Scaffold_1_length_3313439	1915569	NODE_1_length_3313439_1769	SNP34	Negative	1915513	1916334	-1	ecfT_2		ko:K02008		P	Cobalt transport protein, Transmembrane (T) component of an energy-coupling factor (ECF) ABC-transporter complex. Unlike classic ABC transporters this ECF transporter provides the energy necessary to transport a number of different substrates	N	L256I	766	256	1	L	CTT	ATT	I	G	T	G	G	G	G	G	G	G	G	G	G	G	G	G	G	G	G	G	G	G	G	G	G	G	G	G
Scaffold_1_length_3313439	2045676	NA	SNP63	Negative	NA	NA	NA	NA	NA	NA	NA	NA	NA	NA	NA	NA	NA	NA	NA	NA	NA	NA	T	C	T	T	T	T	T	T	T	T	T	T	T	T	T	T	T	T	T	T	T	T	T	T	T	T	T
Scaffold_1_length_3313439	2050659	NODE_1_length_3313439_1898	SNP35	Negative	2050453	2051571	1	dho	3.5.2.3	ko:K01465		S	Deacetylase	N	D69E	207	69	3	D	GAC	GAA	E	C	A	C	C	C	C	C	C	C	C	C	C	C	C	C	C	C	C	C	C	C	C	C	C	C	C	C
Scaffold_1_length_3313439	2081155	NODE_1_length_3313439_1925	SNP36	Negative	2080983	2081234	-1						hypothetical protein	N	A27V	80	27	2	A	GCG	GTG	V	G	A	G	G	G	G	G	G	G	G	G	G	G	G	G	G	G	G	G	G	G	G	G	G	G	G	G
Scaffold_1_length_3313439	2243008	NA	SNP64	Negative	NA	NA	NA	NA	NA	NA	NA	NA	NA	NA	NA	NA	NA	NA	NA	NA	NA	NA	T	C	T	T	T	T	T	T	T	T	T	T	T	T	T	T	T	T	T	T	T	T	T	T	T	T	T
Scaffold_1_length_3313439	2249292	NODE_1_length_3313439_2087	SNP37	Negative	2246361	2250056	-1					M	domain protein	S	G255G	765	255	3	G	GGG	GGA	G	C	T	C	C	C	C	C	C	C	C	C	C	C	C	C	C	C	C	C	C	C	C	C	C	C	C	C
Scaffold_1_length_3313439	2405541	NODE_1_length_3313439_2238	SNP38	Negative	2404970	2405776	1	ymdB		ko:K02029,ko:K02030,ko:K09769		S	YmdB-like protein related to hydrolase activity	N	G191E	572	191	2	G	GGG	GAG	E	G	A	G	G	G	G	G	G	G	G	G	G	G	G	G	G	G	G	G	G	G	G	G	G	G	G	G
Scaffold_1_length_3313439	2455884	NODE_1_length_3313439_2287	SNP39	Negative	2454959	2456350	1	mggB	3.1.3.5	ko:K01081		F	Mannosylglucosyl-3-phosphoglycerate phosphatase, Involved in the biosynthesis of the compatible solute mannosylglucosylglycerate through a phosphorylating pathway.	N	T309M	926	309	2	T	ACG	ATG	M	C	T	C	C	C	C	C	C	C	C	C	C	C	C	C	C	C	C	C	C	C	C	C	C	C	C	C
Scaffold_1_length_3313439	2465374	NA	SNP65	Negative	NA	NA	NA	NA	NA	NA	NA	NA	NA	NA	NA	NA	NA	NA	NA	NA	NA	NA	C	T	C	C	C	C	C	C	C	C	C	C	C	C	C	C	C	C	C	C	C	T	C	C	C	C	C
Scaffold_1_length_3313439	2573899	NODE_1_length_3313439_2398	SNP40	Negative	2573188	2574201	1	lplA	6.3.1.20	ko:K03800		H	Lipoate-protein ligase. Catalyzes both the ATP-dependent activation of exogenously supplied lipoate to lipoyl-AMP and the transfer of the activated lipoyl onto the lipoyl domains of lipoate-dependent enzymes. Is also able to catalyze very poorly the transfer of lipoyl and octanoyl moiety from their acyl carrier protein.	N	E238K	712	238	1	E	GAA	AAA	K	G	A	G	G	G	G	G	G	G	G	G	G	G	G	G	G	G	G	G	G	G	G	G	G	G	G	G
Scaffold_1_length_3313439	2809378	NODE_1_length_3313439_2610	SNP42	Negative	2808090	2810528	1	cutC	4.3.99.4	ko:K20038		C	Choline trimethylamine-lyase, Glycine radical enzyme that catalyzes the cleavage of a C-N bond in choline, producing trimethylamine (TMA) and acetaldehyde, Is involved in the anaerobic choline utilization pathway that allows D.alaskensis to grow on choline as a source of carbon and energy	N	R430H	1289	430	2	R	CGT	CAT	H	G	A	G	G	G	G	G	G	G	G	G	G	G	G	G	G	G	G	G	G	G	G	G	G	G	G	G
Scaffold_1_length_3313439	2857630	NA	SNP66	Negative	NA	NA	NA	NA	NA	NA	NA	NA	NA	NA	NA	NA	NA	NA	NA	NA	NA	NA	G	A	G	G	G	G	G	G	G	G	G	G	G	G	G	G	G	G	G	G	G	G	G	G	G	G	G
Scaffold_1_length_3313439	2953402	NODE_1_length_3313439_2764	SNP44	Negative	2953314	2955896	-1	pbpX				V	Penicillin-binding protein	N	V832A	2495	832	2	V	GTC	GCC	A	A	G	A	A	A	A	A	A	A	A	A	A	A	A	A	A	A	A	A	A	A	A	A	A	A	A	A
Scaffold_1_length_3313439	2958255	NODE_1_length_3313439_2766	SNP45	Negative	2957144	2958337	1	tqsA				S	AI-2 transport protein TqsA; Controls the transport of the quorum-sensing signal AI-2 either by enhancing its secretion or inhibiting its uptake and consequently represses biofilm formation and motility and affects the global gene expression in biofilms.	N	R371P	1112	371	2	R	CGT	CCT	P	G	C	G	G	G	G	G	G	G	G	G	G	G	G	G	G	G	G	G	G	G	G	G	G	G	G	G
Scaffold_1_length_3313439	3027886	NA	SNP67	Negative	NA	NA	NA	NA	NA	NA	NA	NA	NA	NA	NA	NA	NA	NA	NA	NA	NA	NA	T	G	T	T	T	T	T	T	T	T	T	T	T	T	T	T	T	T	T	T	T	T	T	T	T	T	T
Scaffold_1_length_3313439	3030235	NA	SNP68	Negative	NA	NA	NA	NA	NA	NA	NA	NA	NA	NA	NA	NA	NA	NA	NA	NA	NA	NA	T	G	T	T	T	T	T	G	T	T	T	T	T	T	T	T	T	T	T	T	T	T	T	T	T	T	T
Scaffold_1_length_3313439	3118794	NA	SNP69	Negative	NA	NA	NA	NA	NA	NA	NA	NA	NA	NA	NA	NA	NA	NA	NA	NA	NA	NA	C	T	C	C	C	C	C	C	C	C	C	C	C	C	C	C	C	C	C	C	C	C	C	C	C	C	C
Scaffold_1_length_3313439	3169532	NODE_1_length_3313439_2963	SNP48	Negative	3169236	3170735	-1	tagE1	2.4.1.52	ko:K00712	GT4	M	poly(glycerol-phosphate) alpha-glucosyltransferase activity	N	A402T	1204	402	1	A	GCC	ACC	T	C	T	C	C	C	C	C	C	C	C	C	C	C	C	C	C	C	C	C	C	C	C	C	C	C	C	C
Scaffold_1_length_3313439	3211155	NODE_1_length_3313439_3002	SNP49	Negative	3211007	3212317	1	dsdA	4.3.1.18	ko:K01753		E	Belongs to the serine threonine dehydratase family. D-serine dehydratase	N	E50G	149	50	2	E	GAA	GGA	G	A	G	A	A	A	A	A	A	A	A	A	A	A	A	A	A	A	A	A	A	A	A	A	A	A	A	A
Scaffold_1_length_3313439	3214123	NODE_1_length_3313439_3004	SNP52	Negative	3213259	3214215	1			ko:K01992		V	ABC transporter	N	A289T	865	289	1	A	GCA	ACA	T	G	A	G	G	G	G	G	G	G	G	G	G	G	G	G	G	G	G	G	G	G	G	G	G	G	G	G
Scaffold_1_length_3313439	3226280	NA	SNP70	Negative	NA	NA	NA	NA	NA	NA	NA	NA	NA	NA	NA	NA	NA	NA	NA	NA	NA	NA	A	C	A	A	A	A	A	A	A	A	A	A	A	A	A	A	A	A	A	A	A	A	A	A	A	A	A
Scaffold_1_length_3313439	3272893	NODE_1_length_3313439_3069	SNP53	Negative	3272797	3273132	1						hypothetical protein	N	A33S	97	33	1	A	GCT	TCT	S	G	T	G	G	G	G	G	G	G	G	G	G	G	G	G	G	G	G	G	G	G	G	G	G	G	G	G
Scaffold_1_length_3313439	3278040	NODE_1_length_3313439_3073	SNP54	Negative	3277631	3278122	-1					S	pediocin PA-1 immunity family protein	N	S28N	83	28	2	S	AGT	AAT	N	C	T	C	C	C	C	C	C	C	C	C	C	C	C	C	C	C	C	C	C	C	C	C	C	C	C	C
[truncated: 86 more columns]

## Sheet: Table S3
Gene ID	START	END	F/R	Parallel Evolution	Mutated lineage [Parallel Evolution]	Preferred_name	Biological process	Cellular localization	EC number	KEGG KO	CAZy	COG cat	Protein annotation (Prokka)
NODE_1_length_3313439_56	62354	63277	-1	No	NA			Cytoplasmic				L	Transposase and inactivated derivatives, IS30 family DNA replication, recombination, and repair
NODE_1_length_3313439_658	694500	695402	1	No	NA	hcaR	Transcription, Transcription regulation	Cytoplasmic				K	Hca operon transcriptional activator HcaR, Transcriptional activator of the hca operon for 3-phenylpropionic acid catabolism
NODE_1_length_3313439_1205	1280220	1283627	-1	No	NA			Extracellular					hypothetical protein
NODE_1_length_3313439_1257	1338855	1340432	-1	No	NA	ram2	protein farnesylation	Cytoplasmic	3.2.1.40	ko:K05989		G	Bacterial alpha-L-rhamnosidase 6 hairpin glycosidase domain
NODE_1_length_3313439_1717	1860557	1861060	1	No	NA	yagU	Response to acidic Ph	Cytoplasmic		ko:K08996		S	Inner membrane protein YagU response to acidic pH
NODE_1_length_3313439_2601	2798380	2799900	1	No	NA	spa	Virulence	Extracellular; CellWall	3.6.4.13	ko:K03496,ko:K05592		S	Immunoglobulin G-binding protein A, Plays a role in the inhibition of the host innate and adaptive immune responses. Also protected self from phagocytic killing via inhibition of Ig Fc region.
NODE_1_length_3313439_2651	2854006	2855340	1	No	NA	gor	Glutathione metabolic process	Cytoplasmic	1.8.1.7	ko:K00383		C	Glutathione reductase, Maintains high levels of reduced glutathione in the cytosol.
NODE_1_length_3313439_1470	1589395	1592115	-1	Yes	H01;H02;H05;H06;H07;Mouse [L827M, D450A]	trePP	Carbohydrate metabolic process	Extracellular	2.4.1.216,2.4.1.8,3.1.3.12,3.2.1.28	ko:K00691,ko:K01087,ko:K01194,ko:K03731	GH37,GH65	G	Glycosyl hydrolase family 65 central catalytic domain, Trehalose 6-phosphate phosphorylase
NODE_1_length_3313439_2804	3007002	3007931	1	Yes	H01;H03;H05;FISH;MOUSE [A96A, S41A]	int4	DNA integration	Cytoplasmic		ko:K07482		L	Transposase and inactivated derivatives, IS30 family
NODE_1_length_3313439_3003	3212538	3213281	1	Yes	H01;H03;H04;H05;FISH;MOUSE [F99L, V155L]	ybhF	Transport	Cytoplasmic		ko:K01990,ko:K01992		V	AAA domain, putative AbiEii toxin, Type IV TA system,putative ABC transporter ATP-binding protein YbhF
NODE_1_length_3313439_3110	3310848	3311351	-1	Yes	ALL [G130S, T110A, V66G, N60D]	tnp2PF3	Transposition, DNA-mediated	Cytoplasmic				L	Transposase
NODE_1_length_3313439_3111	3311309	3311647	-1	Yes	H01;H03-H07;MOUSE [K35E, S60S]	tnp2PF3	Transposition, DNA-mediated	Cytoplasmic				L	Putative transposase of IS4/5 family (DUF4096)

## Sheet: Table S4
	HNU082	AS-10	AS-6	AS-8	AS-9	ATG-K2	ATG-K6	ATG-K8	B21	b-2	BDGP2sequence	BLS41	BNH17	C410L1	CAUH2	CLP0611	CMPG5300	DF	dm	DOMLa	DR7	DSR_M2	E1	EM	FBL-3a	GB-LP1	HAC01	HFC8	IDCC3501	IRG1	J26	JBE245	JBE490	JDM1	K259	K25	KC28	KC3	KLDS1.0391	KP	LB1-2	LLY-606	LM1004	LMT1-48	LP2	LP3	LPL-1	LQ80	LY-78
HNU082	1	0.990867	0.990978	0.992371	0.992133	0.963203	0.992543	0.992568	0.999118	0.990612	0.992855	0.994688	0.992519	0.99102	0.992938	0.992505	0.992151	0.992656	0.992795	0.991974	0.99256	0.99289	0.992972	0.99279	0.99238	0.991671	0.992561	0.989773	0.992681	0.992844	0.992255	0.992828	0.990793	0.991987	0.994388	0.991387	0.992915	0.990959	0.991291	0.992682	0.992652	0.992677	0.992625	0.991836	0.993061	0.994932	0.990738	0.992485	0.991692
AS-10	0.990867	1	0.999267	0.990621	0.991488	0.962629	0.991004	0.991005	0.990421	0.990792	0.990001	0.991141	0.989723	0.991097	0.990916	0.990991	0.990775	0.99025	0.990056	0.990982	0.990991	0.991033	0.9911	0.990089	0.990587	0.991195	0.990998	0.989629	0.990902	0.990822	0.991216	0.990264	0.990008	0.99113	0.990873	0.989892	0.990753	0.990971	0.991193	0.990037	0.990614	0.990254	0.990572	0.990323	0.99129	0.990762	0.990848	0.990903	0.990344
AS-6	0.990978	0.999267	1	0.990134	0.991381	0.962713	0.990935	0.990935	0.990478	0.990786	0.990445	0.990773	0.989816	0.990655	0.991314	0.990868	0.990254	0.990198	0.990658	0.990438	0.990921	0.990807	0.991047	0.990371	0.990545	0.991178	0.990928	0.989571	0.99079	0.990761	0.99124	0.990473	0.990262	0.990586	0.990601	0.989171	0.990758	0.990711	0.991278	0.990261	0.990485	0.990051	0.990382	0.990151	0.991208	0.990445	0.990849	0.990311	0.990054
AS-8	0.992371	0.990621	0.990134	1	0.992078	0.962983	0.991506	0.991512	0.99203	0.990383	0.991656	0.992075	0.991267	0.990235	0.993124	0.991481	0.991978	0.991592	0.992154	0.991367	0.991489	0.992574	0.992581	0.994313	0.992202	0.991661	0.991493	0.988739	0.994212	0.991869	0.991537	0.993891	0.98997	0.991437	0.992428	0.990414	0.993632	0.991522	0.990532	0.991599	0.992209	0.992536	0.991943	0.99221	0.99288	0.991939	0.990419	0.991956	0.990556
AS-9	0.992133	0.991488	0.991381	0.992078	1	0.962888	0.992028	0.992029	0.992068	0.991638	0.991665	0.992196	0.991639	0.991855	0.991981	0.992019	0.991732	0.99161	0.99164	0.999022	0.992017	0.992152	0.992187	0.992043	0.991677	0.994107	0.992024	0.989849	0.992393	0.992183	0.995585	0.992307	0.991363	0.998995	0.992091	0.991	0.992057	0.993884	0.992157	0.991629	0.992272	0.991783	0.992226	0.991929	0.992059	0.992027	0.991683	0.992006	0.991468
ATG-K2	0.963203	0.962629	0.962713	0.962983	0.962888	1	0.963169	0.963218	0.963242	0.962543	0.962792	0.963286	0.96256	0.962604	0.963419	0.963067	0.963587	0.962794	0.962949	0.96262	0.963058	0.964935	0.964051	0.96332	0.963239	0.963158	0.963064	0.96306	0.963018	0.963269	0.962673	0.962874	0.962418	0.962685	0.963732	0.96341	0.963317	0.963015	0.960821	0.962879	0.964921	0.963493	0.963194	0.962738	0.963388	0.963155	0.962788	0.963057	0.963733
ATG-K6	0.992543	0.991004	0.990935	0.991506	0.992028	0.963169	1	0.999959	0.992064	0.991355	0.992268	0.992456	0.991737	0.991201	0.992884	0.999967	0.99207	0.992356	0.992427	0.991975	0.999967	0.992527	0.99265	0.992647	0.991795	0.992296	0.99997	0.989125	0.992569	0.992388	0.991732	0.992178	0.990977	0.991998	0.992857	0.995409	0.992463	0.991615	0.991387	0.992308	0.992232	0.992175	0.992018	0.991679	0.992799	0.992253	0.991384	0.992243	0.995844
ATG-K8	0.992568	0.991005	0.990935	0.991512	0.992029	0.963218	0.999959	1	0.99206	0.991383	0.992275	0.992428	0.991748	0.991212	0.992905	0.999973	0.992101	0.992379	0.992419	0.991983	0.999974	0.992516	0.992639	0.992658	0.991812	0.992317	0.999974	0.989084	0.992602	0.992405	0.991725	0.992192	0.99098	0.992041	0.992837	0.995406	0.992478	0.991597	0.991401	0.99233	0.992234	0.992161	0.992007	0.991695	0.992793	0.992242	0.991384	0.992244	0.99586
B21	0.999118	0.990421	0.990478	0.99203	0.992068	0.963242	0.992064	0.99206	1	0.990296	0.992107	0.994696	0.991721	0.990307	0.992795	0.991865	0.992133	0.992226	0.992179	0.992055	0.991861	0.992409	0.992481	0.992574	0.991795	0.991522	0.991865	0.989136	0.992216	0.992286	0.991777	0.992591	0.989962	0.992096	0.993727	0.991073	0.992732	0.991271	0.99055	0.992184	0.99231	0.9924	0.992673	0.991665	0.992781	0.994597	0.990385	0.99186	0.991157
b-2	0.990612	0.990792	0.990786	0.990383	0.991638	0.962543	0.991355	0.991383	0.990296	1	0.989882	0.990606	0.989928	0.992279	0.990832	0.991367	0.990279	0.989917	0.990232	0.991142	0.991359	0.990757	0.990797	0.99097	0.989814	0.991777	0.991363	0.989023	0.990867	0.990682	0.990871	0.990885	0.991065	0.99113	0.990543	0.990637	0.990881	0.991069	0.993072	0.989834	0.990629	0.990636	0.99005	0.98975	0.990683	0.990912	0.999914	0.99057	0.990752
BDGP2sequence	0.992855	0.990001	0.990445	0.991656	0.991665	0.962792	0.992268	0.992275	0.992107	0.989882	1	0.992019	0.991636	0.989951	0.99738	0.992217	0.991679	0.998518	0.998928	0.990991	0.992209	0.992858	0.992843	0.993293	0.991493	0.991428	0.992222	0.988608	0.993361	0.992388	0.99074	0.992572	0.989385	0.99116	0.993072	0.99072	0.992762	0.990546	0.99005	0.998499	0.991741	0.992292	0.992309	0.990897	0.997682	0.992025	0.989906	0.991823	0.991187
BLS41	0.994688	0.991141	0.990773	0.992075	0.992196	0.963286	0.992456	0.992428	0.994696	0.990606	0.992019	1	0.991254	0.990875	0.992577	0.992382	0.991684	0.99202	0.992349	0.991377	0.992381	0.992597	0.992592	0.992675	0.992399	0.991869	0.992384	0.989093	0.992309	0.99316	0.991828	0.992349	0.990538	0.991492	0.99473	0.990605	0.992329	0.99068	0.990976	0.992037	0.992604	0.992178	0.991922	0.991776	0.992741	0.999345	0.990719	0.992329	0.990854
BNH17	0.992519	0.989723	0.989816	0.991267	0.991639	0.96256	0.991737	0.991748	0.991721	0.989928	0.991636	0.991254	1	0.990052	0.992646	0.991883	0.991994	0.991894	0.991837	0.990478	0.991885	0.991992	0.99284	0.992547	0.991388	0.99167	0.991884	0.989068	0.991863	0.992039	0.99107	0.991428	0.98968	0.990648	0.992003	0.990358	0.992305	0.991117	0.990477	0.991913	0.992321	0.992446	0.995478	0.991163	0.992392	0.990907	0.989967	0.99145	0.990679
C410L1	0.99102	0.991097	0.990655	0.990235	0.991855	0.962604	0.991201	0.991212	0.990307	0.992279	0.989951	0.990875	0.990052	1	0.991234	0.991197	0.990368	0.989867	0.990639	0.991323	0.991188	0.99094	0.991069	0.990958	0.990473	0.993194	0.991192	0.988817	0.990519	0.990913	0.991124	0.990453	0.99048	0.991353	0.990631	0.990312	0.99086	0.992599	0.997691	0.989887	0.990889	0.990268	0.990699	0.990019	0.991245	0.990638	0.992359	0.990622	0.990512
CAUH2	0.992938	0.990916	0.991314	0.993124	0.991981	0.963419	0.992884	0.992905	0.992795	0.990832	0.99738	0.992577	0.992646	0.991234	1	0.992792	0.992696	0.997238	0.997337	0.992185	0.992792	0.993053	0.993275	0.993981	0.992441	0.991975	0.992792	0.989515	0.993869	0.993061	0.991767	0.994004	0.990561	0.992293	0.993672	0.991697	0.993455	0.991503	0.991125	0.997251	0.993271	0.993121	0.993069	0.99243	0.998895	0.992426	0.990883	0.992576	0.991851
CLP0611	0.992505	0.990991	0.990868	0.991481	0.992019	0.963067	0.999967	0.999973	0.991865	0.991367	0.992217	0.992382	0.991883	0.991197	0.992792	1	0.992091	0.992299	0.992399	0.99181	0.999982	0.992439	0.992566	0.992538	0.991781	0.992228	0.999981	0.989243	0.992617	0.992479	0.991645	0.992271	0.991194	0.991966	0.9928	0.995288	0.992685	0.991516	0.991397	0.992251	0.992203	0.991823	0.9921	0.991911	0.992767	0.992207	0.991398	0.992346	0.995836
CMPG5300	0.992151	0.990775	0.990254	0.991978	0.991732	0.963587	0.99207	0.992101	0.992133	0.990279	0.991679	0.991684	0.991994	0.990368	0.992696	0.992091	1	0.991813	0.992014	0.991027	0.992077	0.992266	0.993389	0.992363	0.991989	0.991648	0.992076	0.989369	0.992231	0.992708	0.991589	0.992311	0.990455	0.991091	0.992585	0.990872	0.992439	0.990269	0.990769	0.991821	0.991782	0.991919	0.992155	0.99122	0.992453	0.992057	0.990308	0.991816	0.991375
DF	0.992656	0.99025	0.990198	0.991592	0.99161	0.962794	0.992356	0.992379	0.992226	0.989917	0.998518	0.99202	0.991894	0.989867	0.997238	0.992299	0.991813	1	0.998232	0.991024	0.992352	0.993026	0.992894	0.993246	0.991718	0.991511	0.992364	0.98867	0.993415	0.992563	0.990831	0.99267	0.989454	0.991192	0.993275	0.990764	0.992686	0.990484	0.990029	0.999965	0.991791	0.992143	0.992421	0.990794	0.997759	0.991961	0.989936	0.991738	0.991286
dm	0.992795	0.990056	0.990658	0.992154	0.99164	0.962949	0.992427	0.992419	0.992179	0.990232	0.998928	0.992349	0.991837	0.990639	0.997337	0.992399	0.992014	0.998232	1	0.991289	0.992397	0.992978	0.992791	0.99335	0.991982	0.991543	0.992403	0.988676	0.993782	0.992414	0.990632	0.992817	0.989982	0.99145	0.993174	0.991201	0.993122	0.990588	0.990424	0.998091	0.991766	0.992581	0.992499	0.991622	0.997876	0.99229	0.990254	0.992148	0.991519
DOMLa	0.991974	0.990982	0.990438	0.991367	0.999022	0.96262	0.991975	0.991983	0.992055	0.991142	0.990991	0.991377	0.990478	0.991323	0.992185	0.99181	0.991027	0.991024	0.991289	1	0.991913	0.991911	0.992079	0.992137	0.991636	0.993959	0.99193	0.98955	0.992093	0.991698	0.995259	0.991724	0.990629	0.999818	0.992	0.990404	0.991701	0.99281	0.991608	0.990998	0.991755	0.991409	0.990745	0.990812	0.992041	0.991442	0.991186	0.991635	0.990699
DR7	0.99256	0.990991	0.990921	0.991489	0.992017	0.963058	0.999967	0.999974	0.991861	0.991359	0.992209	0.992381	0.991885	0.991188	0.992792	0.999982	0.992077	0.992352	0.992397	0.991913	1	0.992513	0.99263	0.992661	0.991808	0.992309	0.999984	0.989116	0.992589	0.992383	0.991712	0.99219	0.990944	0.992032	0.992828	0.995396	0.992457	0.991588	0.991393	0.992319	0.992235	0.992159	0.992005	0.991696	0.992783	0.992229	0.991367	0.992247	0.995852
DSR_M2	0.99289	0.991033	0.990807	0.992574	0.992152	0.964935	0.992527	0.992516	0.992409	0.990757	0.992858	0.992597	0.991992	0.99094	0.993053	0.992439	0.992266	0.993026	0.992978	0.991911	0.992513	1	0.992872	0.993254	0.992176	0.992291	0.992426	0.989641	0.992933	0.992993	0.992263	0.992518	0.990566	0.992058	0.993158	0.99183	0.992954	0.991391	0.991285	0.992883	0.998597	0.992269	0.993759	0.99222	0.992946	0.99205	0.990751	0.992288	0.992103
E1	0.992972	0.9911	0.991047	0.992581	0.992187	0.964051	0.99265	0.992639	0.992481	0.990797	0.992843	0.992592	0.99284	0.991069	0.993275	0.992566	0.993389	0.992894	0.992791	0.992079	0.99263	0.992872	1	0.993494	0.992225	0.992325	0.992561	0.989201	0.993229	0.993007	0.992244	0.993036	0.991033	0.992144	0.992761	0.991818	0.993664	0.991927	0.991368	0.992894	0.992771	0.993411	0.993317	0.992573	0.993217	0.992496	0.990806	0.993149	0.992012
EM	0.99279	0.990089	0.990371	0.994313	0.992043	0.96332	0.992647	0.992658	0.992574	0.99097	0.993293	0.992675	0.992547	0.990958	0.993981	0.992538	0.992363	0.993246	0.99335	0.992137	0.992661	0.993254	0.993494	1	0.992721	0.991714	0.992549	0.989273	0.998701	0.992544	0.991472	0.99655	0.990723	0.992231	0.992934	0.99124	0.995052	0.991142	0.990609	0.993245	0.992847	0.993734	0.992985	0.993684	0.993967	0.992619	0.991	0.992262	0.991693
FBL-3a	0.99238	0.990587	0.990545	0.992202	0.991677	0.963239	0.991795	0.991812	0.991795	0.989814	0.991493	0.992399	0.991388	0.990473	0.992441	0.991781	0.991989	0.991718	0.991982	0.991636	0.991808	0.992176	0.992225	0.992721	1	0.99185	0.991819	0.989298	0.992252	0.992239	0.991483	0.992372	0.990354	0.991758	0.991862	0.990987	0.992656	0.991138	0.990485	0.991588	0.99237	0.992382	0.991926	0.992084	0.99248	0.992136	0.989884	0.992279	0.991211
GB-LP1	0.991671	0.991195	0.991178	0.991661	0.994107	0.963158	0.992296	0.992317	0.991522	0.991777	0.991428	0.991869	0.99167	0.993194	0.991975	0.992228	0.991648	0.991511	0.991543	0.993959	0.992309	0.992291	0.992325	0.991714	0.99185	1	0.992242	0.989698	0.992256	0.991552	0.993327	0.991727	0.990907	0.994049	0.991841	0.991134	0.99184	0.998667	0.993052	0.991331	0.992284	0.991713	0.992019	0.991556	0.992069	0.991835	0.991822	0.99144	0.991127
HAC01	0.992561	0.990998	0.990928	0.991493	0.992024	0.963064	0.99997	0.999974	0.991865	0.991363	0.992222	0.992384	0.991884	0.991192	0.992792	0.999981	0.992076	0.992364	0.992403	0.99193	0.999984	0.992426	0.992561	0.992549	0.991819	0.992242	1	0.989117	0.992588	0.992384	0.991717	0.99219	0.990949	0.992044	0.992833	0.995402	0.992463	0.991594	0.991396	0.992331	0.99224	0.992163	0.992009	0.991701	0.992789	0.992231	0.991371	0.992258	0.995854
HFC8	0.989773	0.989629	0.989571	0.988739	0.989849	0.96306	0.989125	0.989084	0.989136	0.989023	0.988608	0.989093	0.989068	0.988817	0.989515	0.989243	0.989369	0.98867	0.988676	0.98955	0.989116	0.989641	0.989201	0.989273	0.989298	0.989698	0.989117	1	0.989497	0.989137	0.989397	0.988867	0.988277	0.989522	0.989545	0.988278	0.989295	0.989544	0.98838	0.988683	0.989094	0.988932	0.989506	0.988777	0.989704	0.989092	0.989012	0.988764	0.988613
IDCC3501	0.992681	0.990902	0.99079	0.994212	0.992393	0.963018	0.992569	0.992602	0.992216	0.990867	0.993361	0.992309	0.991863	0.990519	0.993869	0.992617	0.992231	0.993415	0.993782	0.992093	0.992589	0.992933	0.993229	0.998701	0.992252	0.992256	0.992588	0.989497	1	0.992784	0.992117	0.996397	0.990633	0.992169	0.992918	0.99134	0.994922	0.99127	0.991057	0.993449	0.99316	0.99358	0.992842	0.993176	0.993742	0.992086	0.99086	0.992129	0.991725
IRG1	0.992844	0.990822	0.990761	0.991869	0.992183	0.963269	0.992388	0.992405	0.992286	0.990682	0.992388	0.99316	0.992039	0.990913	0.993061	0.992479	0.992708	0.992563	0.992414	0.991698	0.992383	0.992993	0.993007	0.992544	0.992239	0.991552	0.992384	0.989137	0.992784	1	0.991869	0.992438	0.990539	0.991875	0.993237	0.991122	0.992889	0.991211	0.991248	0.992499	0.993036	0.992071	0.992833	0.991915	0.992867	0.992818	0.990721	0.992854	0.991472
J26	0.992255	0.991216	0.99124	0.991537	0.995585	0.962673	0.991732	0.991725	0.991777	0.990871	0.99074	0.991828	0.99107	0.991124	0.991767	0.991645	0.991589	0.990831	0.990632	0.995259	0.991712	0.992263	0.992244	0.991472	0.991483	0.993327	0.991717	0.989397	0.992117	0.991869	1	0.991474	0.990535	0.995225	0.992162	0.990812	0.9917	0.992598	0.991044	0.990851	0.991511	0.991555	0.991843	0.991624	0.992408	0.991842	0.99087	0.9916	0.991195
JBE245	0.992828	0.990264	0.990473	0.993891	0.992307	0.962874	0.992178	0.992192	0.992591	0.990885	0.992572	0.992349	0.991428	0.990453	0.994004	0.992271	0.992311	0.99267	0.992817	0.991724	0.99219	0.992518	0.993036	0.99655	0.992372	0.991727	0.99219	0.988867	0.996397	0.992438	0.991474	1	0.989769	0.991732	0.992195	0.991156	0.99484	0.991285	0.990094	0.992684	0.992769	0.992751	0.992573	0.992759	0.993664	0.99217	0.990858	0.992264	0.991257
JBE490	0.990793	0.990008	0.990262	0.98997	0.991363	0.962418	0.990977	0.99098	0.989962	0.991065	0.989385	0.990538	0.98968	0.99048	0.990561	0.991194	0.990455	0.989454	0.989982	0.990629	0.990944	0.990566	0.991033	0.990723	0.990354	0.990907	0.990949	0.988277	0.990633	0.990539	0.990535	0.989769	1	0.9908	0.9903	0.989807	0.990151	0.990919	0.990005	0.989581	0.990027	0.989708	0.990066	0.990213	0.990834	0.990227	0.991022	0.990232	0.990397
JDM1	0.991987	0.99113	0.990586	0.991437	0.998995	0.962685	0.991998	0.992041	0.992096	0.99113	0.99116	0.991492	0.990648	0.991353	0.992293	0.991966	0.991091	0.991192	0.99145	0.999818	0.992032	0.992058	0.992144	0.992231	0.991758	0.994049	0.992044	0.989522	0.992169	0.991875	0.995225	0.991732	0.9908	1	0.992083	0.990455	0.991833	0.992798	0.991609	0.991158	0.991969	0.991471	0.990866	0.990956	0.992123	0.99153	0.991175	0.991726	0.99079
K259	0.994388	0.990873	0.990601	0.992428	0.992091	0.963732	0.992857	0.992837	0.993727	0.990543	0.993072	0.99473	0.992003	0.990631	0.993672	0.9928	0.992585	0.993275	0.993174	0.992	0.992828	0.993158	0.992761	0.992934	0.991862	0.991841	0.992833	0.989545	0.992918	0.993237	0.992162	0.992195	0.9903	0.992083	1	0.991193	0.992757	0.991205	0.990821	0.993043	0.992964	0.992344	0.99258	0.991981	0.993927	0.994358	0.990576	0.991752	0.991334
K25	0.991387	0.989892	0.989171	0.990414	0.991	0.96341	0.995409	0.995406	0.991073	0.990637	0.99072	0.990605	0.990358	0.990312	0.991697	0.995288	0.990872	0.990764	0.991201	0.990404	0.995396	0.99183	0.991818	0.99124	0.990987	0.991134	0.995402	0.988278	0.99134	0.991122	0.990812	0.991156	0.989807	0.990455	0.991193	1	0.991208	0.990697	0.990335	0.990744	0.991323	0.990663	0.991409	0.990622	0.991325	0.990422	0.990627	0.990569	0.999393
KC28	0.992915	0.990753	0.990758	0.993632	0.992057	0.963317	0.992463	0.992478	0.992732	0.990881	0.992762	0.992329	0.992305	0.99086	0.993455	0.992685	0.992439	0.992686	0.993122	0.991701	0.992457	0.992954	0.993664	0.995052	0.992656	0.99184	0.992463	0.989295	0.994922	0.992889	0.9917	0.99484	0.990151	0.991833	0.992757	0.991208	1	0.991353	0.990548	0.992823	0.99291	0.99378	0.992978	0.993047	0.993379	0.992143	0.990967	0.992213	0.991488
KC3	0.990959	0.990971	0.990711	0.991522	0.993884	0.963015	0.991615	0.991597	0.991271	0.991069	0.990546	0.99068	0.991117	0.992599	0.991503	0.991516	0.990269	0.990484	0.990588	0.99281	0.991588	0.991391	0.991927	0.991142	0.991138	0.998667	0.991594	0.989544	0.99127	0.991211	0.992598	0.991285	0.990919	0.992798	0.991205	0.990697	0.991353	1	0.992786	0.990594	0.991235	0.990907	0.990767	0.99056	0.991555	0.990989	0.991087	0.990874	0.991281
KLDS1.0391	0.991291	0.991193	0.991278	0.990532	0.992157	0.960821	0.991387	0.991401	0.99055	0.993072	0.99005	0.990976	0.990477	0.997691	0.991125	0.991397	0.990769	0.990029	0.990424	0.991608	0.991393	0.991285	0.991368	0.990609	0.990485	0.993052	0.991396	0.98838	0.991057	0.991248	0.991044	0.990094	0.990005	0.991609	0.990821	0.990335	0.990548	0.992786	1	0.990022	0.990234	0.990419	0.991096	0.990587	0.991494	0.990688	0.993132	0.990973	0.990523
KP	0.992682	0.990037	0.990261	0.991599	0.991629	0.962879	0.992308	0.99233	0.992184	0.989834	0.998499	0.992037	0.991913	0.989887	0.997251	0.992251	0.991821	0.999965	0.998091	0.990998	0.992319	0.992883	0.992894	0.993245	0.991588	0.991331	0.992331	0.988683	0.993449	0.992499	0.990851	0.992684	0.989581	0.991158	0.993043	0.990744	0.992823	0.990594	0.990022	1	0.991813	0.992136	0.992425	0.990809	0.997747	0.991994	0.989873	0.991748	0.991305
LB1-2	0.992652	0.990614	0.990485	0.992209	0.992272	0.964921	0.992232	0.992234	0.99231	0.990629	0.991741	0.992604	0.992321	0.990889	0.993271	0.992203	0.991782	0.991791	0.991766	0.991755	0.992235	0.998597	0.992771	0.992847	0.99237	0.992284	0.99224	0.989094	0.99316	0.993036	0.991511	0.992769	0.990027	0.991969	0.992964	0.991323	0.99291	0.991235	0.990234	0.991813	1	0.992541	0.993229	0.992147	0.993007	0.992123	0.990579	0.991729	0.991768
LLY-606	0.992677	0.990254	0.990051	0.992536	0.991783	0.963493	0.992175	0.992161	0.9924	0.990636	0.992292	0.992178	0.992446	0.990268	0.993121	0.991823	0.991919	0.992143	0.992581	0.991409	0.992159	0.992269	0.993411	0.993734	0.992382	0.991713	0.992163	0.988932	0.99358	0.992071	0.991555	0.992751	0.989708	0.991471	0.992344	0.990663	0.99378	0.990907	0.990419	0.992136	0.992541	1	0.993458	0.991753	0.992914	0.991902	0.990618	0.99175	0.990993
LM1004	0.992625	0.990572	0.990382	0.991943	0.992226	0.963194	0.992018	0.992007	0.992673	0.99005	0.992309	0.991922	0.995478	0.990699	0.993069	0.9921	0.992155	0.992421	0.992499	0.990745	0.992005	0.993759	0.993317	0.992985	0.991926	0.992019	0.992009	0.989506	0.992842	0.992833	0.991843	0.992573	0.990066	0.990866	0.99258	0.991409	0.992978	0.990767	0.991096	0.992425	0.993229	0.993458	1	0.991639	0.992702	0.992079	0.990054	0.991989	0.991621
LMT1-48	0.991836	0.990323	0.990151	0.99221	0.991929	0.962738	0.991679	0.991695	0.991665	0.98975	0.990897	0.991776	0.991163	0.990019	0.99243	0.991911	0.99122	0.990794	0.991622	0.990812	0.991696	0.99222	0.992573	0.993684	0.992084	0.991556	0.991701	0.988777	0.993176	0.991915	0.991624	0.992759	0.990213	0.990956	0.991981	0.990622	0.993047	0.99056	0.990587	0.990809	0.992147	0.991753	0.991639	1	0.992237	0.991888	0.989638	0.991703	0.990955
LP2	0.993061	0.99129	0.991208	0.99288	0.992059	0.963388	0.992799	0.992793	0.992781	0.990683	0.997682	0.992741	0.992392	0.991245	0.998895	0.992767	0.992453	0.997759	0.997876	0.992041	0.992783	0.992946	0.993217	0.993967	0.99248	0.992069	0.992789	0.989704	0.993742	0.992867	0.992408	0.993664	0.990834	0.992123	0.993927	0.991325	0.993379	0.991555	0.991494	0.997747	0.993007	0.992914	0.992702	0.992237	1	0.992231	0.990727	0.992542	0.991666
LP3	0.994932	0.990762	0.990445	0.991939	0.992027	0.963155	0.992253	0.992242	0.994597	0.990912	0.992025	0.999345	0.990907	0.990638	0.992426	0.992207	0.992057	0.991961	0.99229	0.991442	0.992229	0.99205	0.992496	0.992619	0.992136	0.991835	0.992231	0.989092	0.992086	0.992818	0.991842	0.99217	0.990227	0.99153	0.994358	0.990422	0.992143	0.990989	0.990688	0.991994	0.992123	0.991902	0.992079	0.991888	0.992231	1	0.990999	0.99225	0.990575
LPL-1	0.990738	0.990848	0.990849	0.990419	0.991683	0.962788	0.991384	0.991384	0.990385	0.999914	0.989906	0.990719	0.989967	0.992359	0.990883	0.991398	0.990308	0.989936	0.990254	0.991186	0.991367	0.990751	0.990806	0.991	0.989884	0.991822	0.991371	0.989012	0.99086	0.990721	0.99087	0.990858	0.991022	0.991175	0.990576	0.990627	0.990967	0.991087	0.993132	0.989873	0.990579	0.990618	0.990054	0.989638	0.990727	0.990999	1	0.990695	0.990726
LQ80	0.992485	0.990903	0.990311	0.991956	0.992006	0.963057	0.992243	0.992244	0.99186	0.99057	0.991823	0.992329	0.99145	0.990622	0.992576	0.992346	0.991816	0.991738	0.992148	0.991635	0.992247	0.992288	0.993149	0.992262	0.992279	0.99144	0.992258	0.988764	0.992129	0.992854	0.9916	0.992264	0.990232	0.991726	0.991752	0.990569	0.992213	0.990874	0.990973	0.991748	0.991729	0.99175	0.991989	0.991703	0.992542	0.99225	0.990695	1	0.991191
LY-78	0.991692	0.990344	0.990054	0.990556	0.991468	0.963733	0.995844	0.99586	0.991157	0.990752	0.991187	0.990854	0.990679	0.990512	0.991851	0.995836	0.991375	0.991286	0.991519	0.990699	0.995852	0.992103	0.992012	0.991693	0.991211	0.991127	0.995854	0.988613	0.991725	0.991472	0.991195	0.991257	0.990397	0.99079	0.991334	0.999393	0.991488	0.991281	0.990523	0.991305	0.991768	0.990993	0.991621	0.990955	0.991666	0.990575	0.990726	0.991191	1
LZ206	0.990383	0.990567	0.990008	0.990737	0.991311	0.962384	0.991185	0.991166	0.990148	0.990461	0.990358	0.98984	0.989904	0.993586	0.99099	0.991066	0.989001	0.990403	0.990508	0.990471	0.991163	0.990673	0.991081	0.99066	0.990201	0.994821	0.991167	0.988546	0.990636	0.990804	0.991156	0.990582	0.990504	0.99049	0.990471	0.990468	0.990959	0.993527	0.993652	0.990379	0.990428	0.990595	0.989707	0.989912	0.990857	0.990127	0.990437	0.99033	0.990872
LZ227	0.990369	0.990016	0.990579	0.990612	0.991031	0.962592	0.990979	0.990987	0.990574	0.99106	0.989706	0.990258	0.990431	0.993686	0.99055	0.990867	0.990399	0.989982	0.989866	0.990637	0.990985	0.99109	0.991568	0.99031	0.990934	0.994642	0.990983	0.988347	0.991203	0.990704	0.99036	0.990493	0.990347	0.990839	0.990548	0.990362	0.990584	0.994238	0.99369	0.990019	0.990646	0.990169	0.990262	0.990331	0.990712	0.990517	0.991154	0.99087	0.990585
LZ95	0.993024	0.991458	0.991491	0.993251	0.992039	0.963577	0.992851	0.992865	0.993046	0.990789	0.998079	0.992819	0.99264	0.991457	0.998913	0.992845	0.992645	0.997869	0.997716	0.992211	0.992856	0.993377	0.993351	0.993905	0.992577	0.991768	0.992859	0.98997	0.994125	0.992951	0.99243	0.993876	0.990902	0.992332	0.993657	0.991769	0.99411	0.991531	0.991546	0.997864	0.993166	0.993141	0.993158	0.992626	0.999404	0.99219	0.990782	0.992678	0.991879
MF1298	0.992863	0.990959	0.99066	0.99247	0.992089	0.964174	0.992306	0.992303	0.99213	0.99091	0.992537	0.99245	0.992537	0.991144	0.992908	0.992147	0.99338	0.992618	0.992791	0.992055	0.992285	0.992467	0.998571	0.993373	0.992039	0.991982	0.99229	0.989109	0.993194	0.992802	0.99209	0.992985	0.990586	0.992156	0.992369	0.991493	0.994123	0.991483	0.991405	0.99256	0.992636	0.993365	0.993094	0.992256	0.992944	0.992349	0.990968	0.992872	0.991454
TMW_1.277	0.992835	0.991804	0.991604	0.995156	0.992114	0.963657	0.993035	0.993016	0.992779	0.991048	0.993179	0.992778	0.992624	0.991589	0.993253	0.993022	0.992882	0.99309	0.993204	0.992407	0.993004	0.993504	0.993655	0.99534	0.992593	0.992091	0.993006	0.989549	0.995496	0.99341	0.992124	0.995414	0.991444	0.992389	0.992999	0.992072	0.995026	0.992076	0.991269	0.993101	0.993363	0.993645	0.99344	0.993709	0.993422	0.992694	0.991171	0.992987	0.992277
NCU116	0.991583	0.991264	0.990952	0.991487	0.992048	0.963661	0.992645	0.992629	0.991387	0.990678	0.991596	0.991442	0.99155	0.991286	0.992329	0.992611	0.990864	0.991583	0.991477	0.991717	0.992621	0.991991	0.992388	0.991844	0.991431	0.992453	0.992626	0.989613	0.99182	0.992284	0.991655	0.99205	0.991231	0.991768	0.992302	0.991921	0.992287	0.991024	0.991628	0.991575	0.991703	0.991419	0.991074	0.991308	0.992074	0.991773	0.990701	0.991531	0.992441
nF1	0.993054	0.990601	0.991035	0.994475	0.992315	0.963563	0.992891	0.992921	0.99284	0.991156	0.993564	0.992824	0.992617	0.991196	0.994285	0.992976	0.99288	0.993469	0.993568	0.992264	0.992909	0.993534	0.99371	0.999604	0.992971	0.991772	0.99291	0.989448	0.998967	0.992736	0.991751	0.996741	0.990884	0.992356	0.993115	0.991562	0.995596	0.991599	0.990779	0.993472	0.993357	0.993981	0.993188	0.993919	0.994218	0.99276	0.991221	0.99277	0.991772
nF1-FD	0.992996	0.990554	0.991004	0.99444	0.992279	0.963309	0.992811	0.992847	0.992808	0.991159	0.993597	0.99279	0.992572	0.991142	0.994242	0.992901	0.992809	0.993525	0.993596	0.992226	0.992849	0.993491	0.993674	0.999551	0.992922	0.991702	0.992855	0.989419	0.998912	0.992593	0.99171	0.99669	0.990812	0.992306	0.993082	0.9915	0.995557	0.991562	0.990751	0.993528	0.993317	0.993932	0.993155	0.993871	0.994187	0.992702	0.991225	0.992639	0.991694
pc-26	0.99472	0.990694	0.990761	0.992083	0.991673	0.9635	0.991944	0.991947	0.994578	0.990861	0.992483	0.995377	0.991988	0.990889	0.992505	0.991785	0.992751	0.992632	0.992438	0.991833	0.991937	0.993355	0.992883	0.992288	0.992351	0.991158	0.991938	0.989632	0.992842	0.992486	0.991879	0.992325	0.990503	0.99199	0.995529	0.990728	0.992826	0.991135	0.991174	0.992649	0.99297	0.99201	0.992593	0.991962	0.992808	0.995359	0.990854	0.992074	0.99133
PC520	0.992886	0.991202	0.990605	0.992866	0.992025	0.963471	0.992569	0.992589	0.992632	0.99061	0.997295	0.992626	0.992433	0.991327	0.998697	0.992555	0.992117	0.997394	0.997469	0.99207	0.992582	0.993005	0.992955	0.993643	0.992333	0.991927	0.992596	0.989777	0.993718	0.992581	0.992298	0.993735	0.99068	0.992168	0.993633	0.991206	0.993824	0.991293	0.991496	0.997392	0.992743	0.992895	0.992891	0.992264	0.9996	0.992121	0.990603	0.99209	0.99188
TMW_1.708	0.992052	0.990563	0.990613	0.991665	0.992015	0.963301	0.992585	0.992616	0.992154	0.99031	0.991427	0.991814	0.991209	0.990771	0.992646	0.992336	0.991828	0.991766	0.991592	0.990932	0.992605	0.992191	0.992632	0.991858	0.991577	0.991648	0.992603	0.989175	0.992045	0.992024	0.991727	0.99199	0.990891	0.990983	0.992773	0.991324	0.992383	0.99077	0.991002	0.991556	0.99219	0.99147	0.991293	0.990889	0.992164	0.992125	0.9904	0.991602	0.991628
Q7	0.991499	0.991313	0.991304	0.991278	0.992629	0.963354	0.992103	0.9921	0.991455	0.991675	0.990898	0.991789	0.991236	0.991849	0.991602	0.992107	0.991422	0.990797	0.991143	0.992757	0.992089	0.991848	0.992077	0.991322	0.99119	0.992262	0.992096	0.989157	0.991826	0.991727	0.992415	0.991376	0.991485	0.992744	0.991942	0.990907	0.991837	0.992101	0.992121	0.990821	0.991632	0.991271	0.992017	0.991546	0.991635	0.991815	0.991742	0.99169	0.991149
RI-113	0.992597	0.991377	0.990697	0.994269	0.992631	0.963084	0.992945	0.99298	0.992532	0.990354	0.993606	0.992201	0.992045	0.990923	0.994205	0.992893	0.991687	0.993619	0.993801	0.991865	0.992963	0.993476	0.993336	0.997964	0.992437	0.992047	0.992968	0.989612	0.998221	0.992881	0.992213	0.996159	0.990828	0.991826	0.992646	0.991293	0.994852	0.990822	0.990827	0.993629	0.992914	0.993597	0.9922	0.992789	0.993972	0.992364	0.990346	0.992135	0.991628
SK151	0.993264	0.990599	0.99064	0.992285	0.992076	0.962824	0.992963	0.992962	0.992921	0.990513	0.996216	0.993112	0.992135	0.990882	0.996748	0.992942	0.992632	0.996274	0.996222	0.991618	0.992951	0.993006	0.993359	0.99367	0.992906	0.991846	0.992967	0.989055	0.993538	0.992641	0.991439	0.993349	0.989932	0.991609	0.992963	0.991486	0.99354	0.991343	0.990451	0.996268	0.99257	0.992696	0.992876	0.991888	0.996562	0.992946	0.990556	0.992344	0.991515
SN35N	0.991827	0.990262	0.990343	0.991486	0.99183	0.963122	0.996994	0.997003	0.991588	0.990712	0.990868	0.991357	0.991672	0.990911	0.991873	0.997063	0.990849	0.991143	0.990998	0.991217	0.997003	0.99219	0.9922	0.991502	0.991617	0.991934	0.997001	0.988302	0.992124	0.991911	0.991029	0.99121	0.990114	0.991203	0.992065	0.996089	0.991769	0.991054	0.990496	0.991119	0.991116	0.991712	0.991276	0.991002	0.992231	0.991723	0.990596	0.991544	0.996985
SRCM100434	0.992982	0.991183	0.991088	0.991799	0.992339	0.963743	0.992644	0.99266	0.992327	0.991006	0.99202	0.992839	0.992107	0.990966	0.99301	0.992387	0.992805	0.992102	0.992676	0.991848	0.992655	0.993268	0.993129	0.993145	0.992603	0.991846	0.992657	0.989265	0.992966	0.992668	0.991981	0.992782	0.990406	0.991952	0.992698	0.991336	0.992744	0.991619	0.991073	0.992126	0.993438	0.992462	0.992682	0.992257	0.992723	0.992405	0.991025	0.992238	0.991677
SRCM102022	0.991921	0.990787	0.99075	0.991512	0.991969	0.963571	0.992724	0.992729	0.991192	0.991119	0.990878	0.991934	0.99161	0.991055	0.992245	0.992681	0.991454	0.99093	0.990987	0.992048	0.992724	0.992008	0.992625	0.992017	0.99132	0.992421	0.992722	0.98916	0.991845	0.992433	0.991235	0.992461	0.990781	0.992066	0.992334	0.991812	0.992155	0.991446	0.991034	0.990959	0.991476	0.991461	0.991522	0.991779	0.991969	0.991825	0.991152	0.991579	0.992482
SRCM103295	0.990368	0.990644	0.991169	0.990457	0.991113	0.96273	0.991437	0.991461	0.990852	0.991752	0.990292	0.99059	0.990658	0.991842	0.990935	0.991307	0.990937	0.990351	0.990271	0.990653	0.991445	0.991052	0.991698	0.990157	0.990966	0.991592	0.99145	0.989164	0.991411	0.990792	0.990852	0.990611	0.990647	0.990796	0.990917	0.990554	0.990657	0.991329	0.991491	0.990342	0.990775	0.990852	0.990969	0.990588	0.991229	0.99084	0.991793	0.991055	0.991031
SRCM103297	0.991123	0.991253	0.990961	0.990497	0.991866	0.96251	0.991183	0.9912	0.990378	0.991638	0.990068	0.99053	0.990327	0.995469	0.991151	0.991181	0.990424	0.990029	0.990605	0.991483	0.991199	0.990816	0.991092	0.991099	0.99059	0.993488	0.991209	0.988991	0.990389	0.991213	0.991332	0.990512	0.99025	0.991399	0.990362	0.990332	0.990888	0.993004	0.99584	0.990058	0.990632	0.990255	0.990432	0.990642	0.991088	0.990325	0.99177	0.990997	0.990298
SRCM103300	0.990715	0.989942	0.990163	0.989632	0.991351	0.962249	0.991168	0.991169	0.989942	0.991036	0.989162	0.99054	0.989622	0.990482	0.990593	0.990714	0.990337	0.989523	0.989958	0.990627	0.991155	0.990254	0.990992	0.990668	0.990348	0.990834	0.99116	0.988203	0.990596	0.990454	0.990506	0.989791	0.999592	0.990759	0.990258	0.98983	0.990148	0.990969	0.990052	0.989534	0.990106	0.989644	0.990021	0.990203	0.990835	0.990138	0.991004	0.990274	0.990173
SRCM103311	0.990768	0.989986	0.990175	0.989957	0.991367	0.962374	0.990959	0.990951	0.989945	0.991065	0.9892	0.990521	0.989622	0.990486	0.990564	0.991173	0.990349	0.989461	0.990015	0.990629	0.990945	0.990377	0.990998	0.990706	0.990318	0.990881	0.99095	0.988257	0.990626	0.99047	0.990506	0.989799	0.999929	0.990794	0.990261	0.989826	0.99015	0.990954	0.990047	0.989585	0.9901	0.989676	0.990048	0.990291	0.990841	0.990197	0.991	0.99026	0.990401
SRCM103357	0.992855	0.990631	0.990491	0.992148	0.992146	0.963591	0.991675	0.991698	0.992301	0.990583	0.992007	0.992592	0.991933	0.99077	0.99249	0.991734	0.992328	0.992037	0.991786	0.992017	0.991698	0.9929	0.992927	0.992501	0.992555	0.991738	0.9917	0.989885	0.992735	0.992235	0.991765	0.992163	0.990354	0.992084	0.992984	0.991131	0.992659	0.990989	0.990855	0.991984	0.992524	0.992228	0.992127	0.991849	0.992333	0.99203	0.990556	0.992262	0.991588
SRCM103361	0.99086	0.989835	0.989691	0.989938	0.9915	0.962314	0.990695	0.990684	0.989983	0.991989	0.989089	0.990549	0.989983	0.993356	0.990431	0.990749	0.98963	0.989234	0.98965	0.990824	0.990675	0.990619	0.990934	0.990067	0.99053	0.994736	0.990679	0.987888	0.990591	0.990556	0.99027	0.989655	0.989782	0.991005	0.990423	0.9899	0.989978	0.994232	0.993169	0.98924	0.989393	0.989864	0.990439	0.990079	0.990543	0.990357	0.99206	0.989981	0.990468
SRCM103362	0.992395	0.990675	0.990502	0.991831	0.992194	0.963055	0.996386	0.996399	0.991881	0.991356	0.991926	0.992154	0.991736	0.991127	0.992656	0.996511	0.991875	0.991903	0.991906	0.991936	0.996394	0.99245	0.992731	0.99205	0.99194	0.992218	0.996405	0.989154	0.992657	0.992234	0.991555	0.992241	0.991178	0.992023	0.992245	0.996494	0.99241	0.991654	0.99129	0.9919	0.992381	0.992014	0.992569	0.991779	0.992304	0.992029	0.99131	0.991688	0.996988
SRCM103418	0.992911	0.990845	0.990485	0.992046	0.991914	0.963595	0.992399	0.99243	0.992532	0.990974	0.991824	0.992558	0.991993	0.990941	0.992691	0.992395	0.992261	0.991834	0.99186	0.991778	0.99242	0.992578	0.992866	0.991727	0.99163	0.992117	0.992418	0.98945	0.992255	0.992554	0.991737	0.99225	0.991426	0.991802	0.992948	0.991327	0.992412	0.991423	0.991241	0.991844	0.992058	0.991933	0.992518	0.991816	0.992631	0.992442	0.991059	0.991798	0.991919
SRCM103426	0.990777	0.989947	0.990187	0.989949	0.991271	0.962404	0.991256	0.991261	0.990029	0.990994	0.989355	0.990562	0.989658	0.99057	0.990539	0.990634	0.990367	0.989426	0.989961	0.990595	0.991224	0.990535	0.991005	0.990735	0.990334	0.99091	0.99123	0.988232	0.990616	0.990483	0.990467	0.989767	0.999783	0.990742	0.990293	0.989729	0.990132	0.990781	0.99004	0.989438	0.990216	0.989678	0.990032	0.990204	0.990812	0.990136	0.991	0.990228	0.990408
SRCM103472	0.993163	0.991031	0.990902	0.992882	0.992223	0.963691	0.992691	0.992707	0.993192	0.990536	0.992829	0.992462	0.992423	0.991049	0.992846	0.992568	0.992911	0.992934	0.992801	0.992307	0.992705	0.993022	0.993658	0.993086	0.992816	0.99216	0.992705	0.98957	0.993061	0.99275	0.992179	0.99283	0.990829	0.992494	0.992916	0.991245	0.993079	0.991663	0.991401	0.992962	0.992908	0.993209	0.992855	0.992942	0.993034	0.992385	0.990495	0.992472	0.991741
SRCM103473	0.993132	0.991025	0.990927	0.993077	0.99222	0.963717	0.992717	0.992729	0.993188	0.990533	0.992848	0.992489	0.99211	0.991075	0.992834	0.992592	0.992901	0.992939	0.992789	0.992305	0.992728	0.993019	0.993654	0.992954	0.992801	0.992162	0.992731	0.989571	0.993055	0.992726	0.992176	0.99282	0.990824	0.992487	0.992979	0.991241	0.993076	0.991661	0.991411	0.992967	0.992881	0.993203	0.992851	0.992935	0.993032	0.992409	0.990492	0.992185	0.991731
ST-III	0.992894	0.991162	0.990856	0.992493	0.992019	0.963003	0.992467	0.992488	0.992517	0.990427	0.997017	0.992435	0.991503	0.990775	0.998942	0.992449	0.992171	0.997142	0.997537	0.991628	0.99248	0.992768	0.992928	0.993996	0.992202	0.991903	0.99249	0.989429	0.993532	0.992483	0.991964	0.993422	0.990365	0.991741	0.993531	0.991034	0.993253	0.991108	0.991183	0.997132	0.992788	0.992652	0.992578	0.991716	0.999706	0.991979	0.990444	0.992329	0.991486
TMW_1.1478	0.991969	0.990344	0.989999	0.992012	0.991897	0.96268	0.991829	0.991845	0.992149	0.990014	0.991573	0.991953	0.992399	0.990681	0.992912	0.991829	0.991405	0.991689	0.991696	0.990802	0.991829	0.992734	0.993277	0.992615	0.992456	0.991725	0.991845	0.988677	0.992904	0.992547	0.991072	0.992581	0.989802	0.990971	0.992365	0.99088	0.993069	0.990314	0.990371	0.991708	0.992155	0.992786	0.992134	0.991618	0.993166	0.992259	0.990029	0.991932	0.991286
TMW_1.1623	0.992665	0.99095	0.990999	0.994455	0.992268	0.963332	0.992556	0.992581	0.992122	0.990629	0.993748	0.992653	0.992106	0.990859	0.993896	0.992529	0.992329	0.993887	0.994058	0.992124	0.992574	0.993203	0.99313	0.998715	0.992521	0.991883	0.992578	0.989693	0.998383	0.992725	0.992092	0.99625	0.991015	0.992167	0.992413	0.991595	0.99528	0.991647	0.990815	0.99379	0.993116	0.993559	0.992732	0.993268	0.993847	0.992204	0.990668	0.992555	0.99179
TS12	0.991819	0.990819	0.99071	0.991353	0.992284	0.963332	0.99176	0.991778	0.991328	0.991404	0.990068	0.991503	0.990823	0.991524	0.990867	0.991718	0.990668	0.990236	0.990117	0.992182	0.991756	0.99152	0.991806	0.991018	0.990945	0.992257	0.991761	0.988635	0.991375	0.992031	0.992085	0.990954	0.990584	0.992163	0.991307	0.990899	0.991029	0.991237	0.991267	0.990207	0.990595	0.991348	0.991203	0.99128	0.991084	0.991399	0.991463	0.990927	0.991352
UNQLp11	0.991081	0.990724	0.990142	0.990556	0.991738	0.962782	0.991093	0.9911	0.990973	0.990083	0.99041	0.990308	0.990135	0.990904	0.991433	0.991037	0.989863	0.990492	0.990824	0.990913	0.991084	0.990668	0.991262	0.991112	0.990612	0.991612	0.99109	0.989369	0.990771	0.99125	0.991373	0.990946	0.990159	0.990929	0.991226	0.989943	0.991031	0.989929	0.990745	0.990501	0.99075	0.990634	0.989876	0.989697	0.991131	0.990563	0.990212	0.990234	0.990421
WCFS1	0.992877	0.990811	0.990909	0.991737	0.991657	0.963399	0.992377	0.992339	0.992846	0.991066	0.991737	0.993023	0.991604	0.991293	0.992742	0.992419	0.992822	0.991591	0.991585	0.991749	0.992333	0.992611	0.992956	0.992681	0.992784	0.991409	0.992339	0.989156	0.992801	0.992391	0.990889	0.992208	0.989957	0.991817	0.992239	0.991163	0.992194	0.991189	0.991032	0.991608	0.992812	0.991921	0.992654	0.991628	0.992521	0.992679	0.991049	0.992939	0.991256
WLPL04	0.992682	0.990939	0.990987	0.994442	0.992258	0.963343	0.992542	0.992588	0.99211	0.99061	0.993736	0.992635	0.992119	0.990858	0.993905	0.992537	0.992342	0.993889	0.994042	0.99211	0.992585	0.993189	0.993114	0.998723	0.992534	0.991897	0.992585	0.989679	0.998394	0.992717	0.992073	0.996258	0.991001	0.99218	0.992401	0.991589	0.995257	0.991594	0.990814	0.993793	0.9931	0.99351	0.99272	0.993279	0.993834	0.9922	0.99065	0.992565	0.991802
X7021	0.99082	0.990756	0.990327	0.989993	0.991303	0.962887	0.990914	0.990909	0.990252	0.996143	0.989118	0.990497	0.989715	0.991614	0.99083	0.990892	0.990292	0.989236	0.990107	0.990929	0.990901	0.99043	0.990886	0.99086	0.990144	0.991457	0.990904	0.988838	0.990503	0.990646	0.990709	0.990216	0.990824	0.990947	0.990427	0.990172	0.990718	0.991363	0.992243	0.989262	0.990393	0.990078	0.990196	0.990069	0.990617	0.990299	0.996175	0.99025	0.990312
YW11	0.990936	0.991283	0.99157	0.991038	0.992036	0.962863	0.99173	0.99173	0.991092	0.993004	0.990612	0.99163	0.990925	0.998455	0.990837	0.991713	0.991313	0.99076	0.990615	0.992022	0.991723	0.991783	0.991909	0.990308	0.991056	0.993151	0.991729	0.989438	0.991512	0.991301	0.991326	0.990627	0.990942	0.991991	0.991434	0.990609	0.990801	0.992985	0.998551	0.990779	0.990967	0.990886	0.991327	0.990976	0.99153	0.991275	0.993105	0.99141	0.99087
ZFM4	0.990485	0.990583	0.990026	0.990759	0.991329	0.962398	0.991209	0.991215	0.990169	0.990484	0.990387	0.989864	0.989953	0.993648	0.991044	0.991114	0.989048	0.990441	0.990532	0.990488	0.991214	0.990694	0.9911	0.990708	0.990247	0.994873	0.991213	0.988564	0.990716	0.990828	0.991206	0.990633	0.990521	0.990548	0.990493	0.990501	0.990978	0.993548	0.99369	0.990417	0.99045	0.990613	0.989727	0.989964	0.990878	0.990166	0.990457	0.99038	0.990925
ZFM55	0.993048	0.99146	0.991529	0.993262	0.992086	0.96365	0.992865	0.992879	0.993098	0.99081	0.998119	0.992864	0.992648	0.991502	0.998942	0.99286	0.992651	0.997886	0.997762	0.992227	0.99287	0.993411	0.993361	0.99391	0.992593	0.991779	0.99287	0.989978	0.994139	0.992968	0.992437	0.993914	0.990908	0.992347	0.993716	0.99179	0.994108	0.991583	0.991597	0.997874	0.993207	0.993122	0.993189	0.992636	0.999446	0.992235	0.990804	0.992657	0.991901
ZFM9	0.993078	0.991474	0.991355	0.993221	0.992097	0.963546	0.992852	0.992851	0.993109	0.990823	0.998119	0.992889	0.992635	0.991527	0.998924	0.992831	0.99262	0.997884	0.997754	0.992238	0.992841	0.993419	0.993345	0.99391	0.992591	0.99179	0.992843	0.989996	0.994121	0.992974	0.992446	0.993908	0.990979	0.992348	0.993698	0.991535	0.994124	0.991768	0.991602	0.997878	0.993212	0.993136	0.993201	0.992648	0.999444	0.992248	0.990818	0.992626	0.991897
Zhang-LL	0.991511	0.991271	0.991257	0.991205	0.992587	0.963367	0.992075	0.992082	0.991388	0.991575	0.990797	0.991746	0.991236	0.991818	0.99157	0.992066	0.991403	0.990798	0.991067	0.992713	0.992075	0.991808	0.992031	0.991295	0.991149	0.992231	0.992078	0.989135	0.991819	0.991568	0.992369	0.991374	0.991441	0.992713	0.9919	0.990859	0.991792	0.992058	0.992065	0.990822	0.991615	0.991227	0.991972	0.991525	0.991589	0.991774	0.991645	0.991659	0.991134
ZJ316	0.990245	0.990533	0.990117	0.99054	0.99142	0.962449	0.991275	0.991259	0.990064	0.990513	0.989954	0.989804	0.989911	0.993569	0.9909	0.99117	0.989006	0.990363	0.990493	0.990415	0.991268	0.990769	0.991074	0.99063	0.990188	0.994805	0.991255	0.988539	0.990595	0.990924	0.991178	0.99057	0.990375	0.990491	0.990392	0.990554	0.990936	0.993736	0.993707	0.990187	0.990507	0.990447	0.989596	0.990088	0.990869	0.990086	0.990527	0.990201	0.99102
ZS2058	0.992846	0.991303	0.99107	0.992473	0.991986	0.963561	0.992523	0.992547	0.992815	0.99136	0.992612	0.993369	0.992842	0.991644	0.992871	0.992723	0.992634	0.992738	0.99271	0.992095	0.992539	0.993226	0.992954	0.99208	0.992787	0.991901	0.992539	0.989871	0.992915	0.99268	0.991996	0.992633	0.991283	0.992211	0.992876	0.991643	0.992407	0.991565	0.992055	0.992787	0.993036	0.992394	0.992967	0.992698	0.992839	0.993262	0.991375	0.992761	0.991824
ATCC_8014	0.992103	0.991002	0.990424	0.99136	0.999055	0.962579	0.99197	0.991986	0.992083	0.991115	0.991038	0.991399	0.990484	0.991289	0.992235	0.991832	0.991087	0.991063	0.991336	0.999915	0.991973	0.991965	0.992072	0.992187	0.991692	0.993972	0.991991	0.989506	0.992105	0.991705	0.995303	0.991748	0.990678	0.999791	0.992037	0.99042	0.991769	0.99278	0.991558	0.991096	0.991797	0.991423	0.99075	0.99082	0.992054	0.991492	0.991045	0.991615	0.990787
CGMCC_1.557	0.992325	0.990968	0.990691	0.991574	0.991894	0.962841	0.996885	0.996896	0.991865	0.991083	0.991143	0.991829	0.991498	0.990689	0.992333	0.996994	0.991976	0.991262	0.99169	0.991653	0.996896	0.992419	0.99236	0.992166	0.991773	0.992087	0.996907	0.988919	0.992194	0.991986	0.991356	0.991861	0.990768	0.991655	0.992314	0.996495	0.992087	0.991484	0.991073	0.991278	0.992097	0.991619	0.992138	0.991676	0.992395	0.99171	0.991036	0.991954	0.997028
DSM_16365	0.957034	0.955883	0.955936	0.956408	0.956712	0.985837	0.957319	0.957355	0.957182	0.956818	0.95682	0.956902	0.956789	0.956807	0.957109	0.95723	0.957231	0.956868	0.956829	0.957105	0.957223	0.957281	0.957333	0.95716	0.957262	0.956514	0.957209	0.956829	0.957379	0.957199	0.956216	0.95684	0.956259	0.957154	0.95701	0.957845	0.956779	0.956617	0.956571	0.956995	0.957265	0.956886	0.957002	0.957245	0.957063	0.957051	0.956955	0.957487	0.958081
KACC_92189	0.992815	0.990834	0.990773	0.991858	0.99216	0.963236	0.992349	0.992386	0.992254	0.990632	0.992427	0.993129	0.991996	0.990864	0.99306	0.992476	0.992646	0.992553	0.992424	0.991679	0.992369	0.99297	0.992978	0.992545	0.992222	0.991558	0.992368	0.989153	0.992762	0.999956	0.991892	0.992212	0.990446	0.991877	0.993281	0.991335	0.992873	0.99127	0.991194	0.992619	0.993056	0.992046	0.99268	0.991946	0.992841	0.992799	0.990712	0.992776	0.991647
NCIMB_700965	0.988544	0.987638	0.987614	0.987228	0.988402	0.961018	0.988009	0.988021	0.987909	0.987864	0.987024	0.98796	0.987314	0.987405	0.988233	0.98806	0.987728	0.987093	0.987321	0.988118	0.988011	0.988203	0.98823	0.987938	0.988095	0.988454	0.988014	0.986457	0.988208	0.98812	0.988216	0.987327	0.986909	0.988123	0.988391	0.986993	0.98802	0.987852	0.987356	0.987102	0.98736	0.987622	0.98813	0.98763	0.988256	0.987866	0.987861	0.987655	0.987258
TMW_1.25	0.99278	0.991646	0.991481	0.995217	0.992076	0.963756	0.992947	0.992929	0.992748	0.990973	0.993116	0.992787	0.99265	0.991504	0.993194	0.992935	0.992779	0.993029	0.993141	0.992365	0.992913	0.993459	0.993528	0.9954	0.992651	0.992038	0.992919	0.989593	0.995555	0.993291	0.992087	0.995425	0.99133	0.992347	0.992965	0.991995	0.995095	0.992022	0.99118	0.993041	0.993324	0.993734	0.993351	0.993679	0.993358	0.992669	0.991066	0.992927	0.992196
10CH	0.992783	0.990647	0.990017	0.99191	0.991831	0.963794	0.992175	0.992183	0.992035	0.990642	0.991656	0.992154	0.991679	0.990305	0.992747	0.99217	0.999783	0.991807	0.992067	0.99133	0.992166	0.992046	0.993407	0.992312	0.992034	0.991442	0.992172	0.989427	0.992156	0.992637	0.991699	0.992285	0.990356	0.991485	0.992557	0.990817	0.992243	0.990779	0.99077	0.991817	0.991775	0.99193	0.992717	0.991607	0.992274	0.991818	0.990662	0.991637	0.991186
12_3	0.990453	0.990377	0.990234	0.989519	0.991051	0.962375	0.990743	0.990778	0.989717	0.998547	0.988922	0.990057	0.989178	0.99163	0.990534	0.990668	0.989603	0.988904	0.989653	0.990213	0.990729	0.990164	0.990552	0.990446	0.989579	0.99123	0.990733	0.988583	0.990155	0.990121	0.990409	0.989893	0.990077	0.990198	0.990216	0.989636	0.990277	0.990427	0.992369	0.988852	0.989996	0.989631	0.989253	0.989077	0.990187	0.99027	0.998541	0.99005	0.989886
13_3	0.991098	0.99099	0.991422	0.990845	0.992102	0.963161	0.991773	0.991779	0.991029	0.991507	0.99021	0.991329	0.990717	0.992427	0.990525	0.991762	0.991231	0.990435	0.990141	0.991878	0.991759	0.991468	0.991766	0.990435	0.990769	0.991737	0.991765	0.988942	0.991495	0.991301	0.991797	0.990678	0.990573	0.992039	0.991321	0.990526	0.991026	0.991354	0.99224	0.99046	0.990884	0.990866	0.991543	0.991368	0.991117	0.991049	0.991642	0.991163	0.990901
16-	0.990678	0.991237	0.991534	0.990841	0.991901	0.962848	0.991777	0.991784	0.991113	0.993008	0.990478	0.991501	0.991077	0.999129	0.990974	0.991781	0.991012	0.990631	0.990444	0.991962	0.991773	0.991654	0.991712	0.990588	0.991067	0.993172	0.991777	0.98923	0.991447	0.991687	0.991351	0.990787	0.990606	0.991984	0.991414	0.991034	0.990859	0.993044	0.998212	0.990655	0.99043	0.991027	0.991447	0.99098	0.991535	0.991402	0.993013	0.991554	0.991204
5-2	0.992592	0.990484	0.990575	0.992114	0.991941	0.963454	0.991906	0.991918	0.992298	0.990054	0.99105	0.992365	0.991109	0.990373	0.992533	0.991919	0.992189	0.991205	0.991705	0.99137	0.991918	0.992695	0.992607	0.992301	0.993501	0.991518	0.991919	0.989284	0.991986	0.992235	0.991132	0.992259	0.990028	0.991406	0.992671	0.990908	0.992285	0.991045	0.990258	0.991216	0.992319	0.992251	0.99186	0.991887	0.992596	0.992137	0.990143	0.992169	0.991181
[truncated: 54 more columns]

## Sheet: Table S5
Node	Mobile Element	Length (bp)	Location	Taxonomic Source	Gene #	Aliases	Functional Annotation	1H1A	1H3A	1H6B	1H8B	1H9B	1H11B	1H12C	1H13C	1H15C	1H18D	1H20D	1H25E	1H27E	1H28E	1H29E	2H31A	2H33A	2H44B	2H45B	2H47B	2H50C	2H51C	2H52C	3H63A	3H66A	3H67A	3H68A	3H69C	3H72C	3H73D	3H79D	3H84E	3H85E	4H93B	4H96B	4H97C	4H100D	4H101D	4H102D	4H103D	4H105E	5H113B
H100_node_104|873	MED023	1129	Plasmid	Lactobacillus pentosus	3	ATPase	ATPase	0	0	0	0	0	0	330	410	420	540	520	560	390	330	460	0	0	0	0	0	360	190	260	0	6.5	2.8	6.9	350	410	350	330	400	300	0	0	320	390	340	420	370	430	0
H124_node_86|14742	MED027	1146	Plasmid	Lactobacillus plantarum	1	topA_2, 5.99.1.2	DNA topoisomerase 1	0	0	0	0	0	0	99	100	160	120	150	130	130	98	100	0	0	0	0	0	140	140	150	0	89	120	120	96	100	100	78	88	97	0	0	66	100	97	100	110	84	0
[truncated: 67 more columns]

## Sheet: Table S6
A	HA1	HA2	HA3	HA4	HA5	HA6	HA7	HB1	HB2	HB3	HB4	HB5	HB6	HB7	HC1	HC2	HC3	HC4	HC5	HC6	HC7	HD1	HD2	HD3	HD4	HD5	HD6	HD7	HE1	HE2	HE3	HE4	HE5	HE6	HE7	HF1	HF2	HF3	HF4	HF5	HF6	HF7	VA1	VA2	VA3	VA4	VA5	VD1	VD2
Faecalibacterium prausnitzii	30.21	7.21	14.18	4.98	10.83	1.92	12.41	23.4	5.96	6.74	9.93	8.35	10.69	6.33	14.24	34.14	9.47	12.84	26.57	22.87	15.73	10.2	10.65	12.96	1.9	16.98	10.85	14.53	14.92	2.3	8.24	1.9	16.28	12.27	16.57	33.9	2.87	9.96	8.33	18.56	18.34	7.67	10.404	18.317	21.271	4.823	11.405	16.462	19.884
Bacteroides vulgatus	0.69	0.73	3.4	14.73	11.79	2.63	31.2	0.5	9.5	5.94	24.14	12.81	5.05	3.44	0.24	1.31	4.83	18.48	2.41	0.11	23.27	1.07	6.6	3.2	27.03	12.39	8.11	19.41	1.38	2.08	7.71	28.68	6.61	8.11	21.64	1.71	9.62	5.43	14.27	2.68	2.16	28.45	16.71	1.392	7.92	3.978	7.69	20.765	1.151
[Eubacterium] rectale	0.69	0.28	0.62	1.99	6.33	0.49	4.12	1.14	0.27	0.37	1.08	3.93	3.96	11.31	0.65	0.36	1.03	1.37	23.07	5.25	6.82	1.08	0.21	0.86	1.04	8.4	2.85	16.66	1.1	0.36	0.95	0.73	12.76	1.81	1.34	0.97	0.21	0.91	2.7	14.63	1.02	6.63	2.975	1.092	0.915	0.254	21.813	2.252	0.825
Bacteroides dorei	0.13	0.03	1	3.37	0.86	8.25	1.38	0.11	0.44	1.48	3.8	1.01	14.64	0.25	0.05	0.05	1.47	4.3	0.28	0.24	1.19	0.22	0.33	0.99	9.72	0.83	21.9	0.74	0.21	0.08	1.97	12.54	0.67	12.37	1.03	0.19	0.59	1.46	7.14	0.18	4.71	1.1	0.5	0.26	0.382	9.584	1.006	1.683	0.232
Bacteroides uniformis	2.91	0.04	1.21	1.99	2.01	8.31	3.45	3.87	0.5	1.77	1.47	1.87	8.23	0.56	2.03	0.29	1.55	1.29	0.77	1.13	3.13	5.2	0.8	2.91	3.66	1.18	7.81	0.92	2.7	0.14	1.3	2.69	1.39	11.94	4.1	2.44	0.8	2.19	1.95	0.18	6.06	2.45	5.674	1.263	2.062	9.448	3.565	2.895	1.599
Blautia sp. SC05B48	2.22	2.75	1.65	3.57	1.37	0.98	1.29	1.75	5.25	0.5	1.68	1.44	1.54	12.94	3.91	2.51	1.39	2.94	1.72	4.73	1.28	2.28	2.1	1.57	1.12	1.1	0.86	2.45	1.5	1.37	1.26	0.82	1.51	1.25	5.18	1.21	0.79	1.98	1.73	6.26	2.8	6.19	0.883	1.466	2.045	0.592	2.827	0.608	1.045
Bifidobacterium pseudocatenulatum	2	26.35	0.12	0.01	0.66	0.37	0	3.31	16.45	0.02	0.01	0.5	0.19	0.01	11.31	3.2	0.07	0.01	0.33	1.7	0.01	2.27	13.08	0.15	0.01	0.33	0.54	0.01	2.51	1.78	0.04	0	0.16	0.18	0	2.47	4.14	0.12	0.01	6.66	0.4	0.01	0.02	0.03	4.447	0.002	4.294	0.043	0.02
Bacteroides fragilis	0.97	0.3	1.8	1.87	5.83	4.06	2.8	1.15	2.63	2.32	1.39	5.85	3.64	0.45	0.4	0.18	2.17	1.22	2.02	0.27	2.86	1.39	2.25	1.59	2.84	3.63	3.83	1.63	2.07	0.75	2.52	3.8	5.02	3.09	2.78	1.98	4.13	2.28	1.8	1.3	1.32	2.58	2.664	1.365	2.752	4.224	2.838	1.76	1.381
Bacteroides ovatus	0.44	0.22	1.19	8.39	4.21	6.52	1.54	1.11	1.24	1.7	2.69	3.11	2.42	0.42	0.21	0.23	2.42	1.76	0.91	0.23	1.24	1.86	1.57	1.52	9.95	1.43	1.5	0.66	1.05	0.19	1.61	15.28	1.81	1.17	1.61	1.37	0.83	0.98	5.85	0.3	0.92	1.09	4.389	0.751	4.463	3.008	0.94	7.797	0.768
Enterococcus faecium	0.14	0.04	0.07	0.1	0.04	0.02	0.05	1.29	0.08	0.06	0.11	2.97	0.19	4.73	1.02	0.98	0.07	0.14	0.06	0.09	0.09	0.18	0.03	0.07	0.08	0.05	0.04	0.21	5.38	64.89	0.03	0.06	0.06	0.04	0.06	1.25	0.42	0.04	0.18	0.1	0.66	1.23	0.04	0.049	0.054	0.028	0.055	0.039	0.043
Collinsella aerofaciens	0.06	5.42	1.42	1.7	0.66	0.86	0.01	0.06	7.3	0.39	1.01	1.64	1.49	0.02	0.09	7.9	1.08	1.45	1.76	9.5	0.02	0.05	2.21	1.78	0.45	0.4	1.12	0.01	0.06	1.66	0.88	0.26	1.32	1.71	0.02	0.05	1.57	1.22	0.73	4.27	11.32	0.01	0.046	1.251	0.022	0.602	0.022	0.048	1.06
Roseburia intestinalis	1.1	0.41	3.96	9.88	0.58	0.18	0.44	1.6	0.41	2.03	11.47	0.76	0.72	1.27	1.3	0.61	1.46	2.97	1.14	2.19	0.55	1.41	0.31	0.94	2.03	0.82	0.68	1.16	1.49	0.4	1.14	1.62	0.73	1.33	1.32	2.08	0.21	0.97	3.92	1.66	1	2.41	3.712	2.998	1.11	0.35	1.269	15.262	2.299
Parabacteroides distasonis	0.72	0.03	2.54	0.39	1.13	0.9	2.58	1.29	0.4	3.04	0.35	1.6	0.79	0.17	0.53	0.21	4.62	0.36	0.68	0.04	0.62	1.83	0.47	13.67	0.81	0.59	0.43	0.49	2.98	0.16	7.84	0.41	0.89	0.41	0.85	1.66	0.54	11.4	0.25	0.12	0.17	0.44	0.401	0.471	1.386	3.935	0.484	0.628	0.533
Anaerostipes hadrus	1.45	7.21	0.53	2.37	0.78	0.4	0.59	1.4	0.85	0.23	3.35	2.21	0.49	2.49	2.89	1.18	0.41	1.85	1.05	1.29	0.67	1.45	3.11	0.92	1.83	2.72	0.61	0.9	1.97	1.59	0.52	0.53	0.85	0.57	0.6	1.32	4.28	0.57	4.57	3.95	0.59	0.89	0.773	0.558	0.532	0.153	1.429	0.834	0.491
Bifidobacterium longum	3.54	3.16	0.53	1.33	0.31	1.52	0.01	3.77	1.41	0.07	5.39	0.27	0.4	0.04	16.14	0.39	0.64	3.14	0.29	5.47	0.02	4.52	1.08	1.42	0.22	0.2	1.06	0.02	1.26	0.32	0.37	0.22	0.09	0.55	0.01	1.38	0.23	0.52	0.42	3.98	1.97	0.02	0.206	0.045	3.045	0.011	0.071	0.048	0.034
Bacteroides sp. A1C1	0.73	0.03	0.49	3.07	4.76	2.99	3.77	0.92	0.43	0.74	0.83	3.93	2.25	0.37	0.48	0.11	0.69	1.18	1.53	0.22	2.75	1.32	0.43	0.83	5.04	1.97	2.21	0.94	0.82	0.1	0.54	2.2	2.4	2.82	2.62	0.73	0.49	0.74	3.12	0.34	1.31	1.76	2.021	0.433	0.518	2.493	2.217	0.755	0.528
Lachnospiraceae bacterium GAM79	3.64	0.43	1.49	1.33	2.7	0.42	0.6	4.18	0.55	1.23	0.98	0.88	1.94	1.68	2.83	1.53	0.91	1.62	1.95	0.96	0.68	7.07	0.43	1.1	1.46	2.7	1.66	0.75	1.28	0.22	2.48	1.01	0.96	1.49	0.54	1.72	0.17	2.51	2.27	1.21	0.57	0.44	5.255	3.352	2.852	0.302	0.925	5.364	3.816
Anaerobutyricum hallii	4.53	1.54	1.55	1.81	0.63	0.59	0.42	3.21	0.57	0.37	0.97	0.92	1.02	2.19	6.42	0.74	1.7	1.32	0.77	3.69	0.43	2.64	0.5	1.9	0.52	0.65	0.82	0.85	2.23	0.4	1.05	0.4	0.95	1.14	1.16	1.57	0.2	1.72	0.83	1.89	2.08	0.92	0.423	0.727	0.538	0.409	1.038	0.321	0.584
Roseburia hominis	5.88	1	0.78	1.7	1.34	0.29	0.42	3.89	0.92	0.41	1	1.06	0.75	1.08	1.48	0.98	0.85	1.7	1.67	1.71	0.56	2.76	0.91	0.97	2.14	2.57	0.56	0.78	1.02	0.47	0.91	0.94	0.82	0.75	0.5	1.53	0.21	0.94	4.61	1.32	0.63	0.46	1.953	2.816	0.813	2.898	0.989	1.12	2.223
Bacteroides thetaiotaomicron	0.37	0.05	1.81	0.68	3.4	1.78	2.41	0.82	1.18	2.07	0.21	3.12	1.82	0.22	0.25	0.03	1.84	0.31	0.75	0.13	1.9	0.99	1.33	1.89	0.72	1.07	1.81	0.66	1.27	0.09	1.93	0.55	1.98	2.15	2.66	1.35	2.41	1.93	0.36	0.35	0.81	1.64	1.775	1.312	0.837	6.225	0.898	0.922	1.47
Bacteroides caccae	0.74	0.14	0.67	1.01	1.26	3.08	2.04	1.28	0.52	0.92	0.32	1	1.14	0.75	0.52	0.02	0.96	0.33	0.41	0.08	3.57	1.31	0.99	0.75	2.04	0.75	2.36	0.69	2.01	0.28	0.9	4.07	1.5	2.4	2.79	1.37	0.88	1.05	1.11	0.23	1.29	2.63	3.628	0.388	2.668	2.489	0.66	0.888	0.386
Dialister sp. Marseille-P5638	2.8	0.01	0.02	0.02	0.04	0.82	0	3.21	0.01	0.02	0.01	0.09	1.14	0.01	1.39	0.01	0.02	0.01	0.08	2.7	0.01	4.81	0.01	0.01	0.01	0.1	0.62	0.01	10.13	0.01	0.02	0.01	0.08	1.7	0.01	6.85	0.02	0.02	0.01	0.56	7.38	0.01	0.01	0.777	0.198	0.006	2.379	0.005	0.652
Streptococcus salivarius	0.94	13.34	0.32	0.02	0.06	0	0.04	1.34	1.64	0.07	0	0.21	0.28	0.36	1.21	6.2	0.29	0.05	0.67	0.44	0.45	1.08	3.22	0.56	0.11	0.49	0.02	0.39	1.16	3.59	0.2	0.07	0.23	0.03	0.23	0.44	1.7	0.13	0.12	2.23	0.07	0.39	0.013	0.108	1.745	0.062	0.04	0.049	0.05
Alistipes shahii	0.95	0.01	2.47	0.47	2.37	4.61	0.09	1.61	0.08	3.59	0.05	0.72	1.33	0.03	0.85	0.04	3.21	0.08	1.02	0.11	0.04	1.57	0.14	2.72	0.57	1.07	0.72	0.03	1.5	0.02	1.78	0.29	2.43	1.04	0.11	2.24	0.12	2.91	0.23	0.11	0.44	0.07	0.599	1.111	0.086	1.184	0.427	0.338	1.411
Bacteroides xylanisolvens	0.31	0.04	1.62	1.09	1.46	4	1.28	0.53	0.38	2.25	0.47	1.6	1.19	0.41	0.16	0.04	2.2	0.48	0.56	0.07	1.92	0.89	0.48	0.95	2.21	0.8	0.8	0.65	0.77	0.04	1.6	2.7	0.93	0.66	2.42	0.62	0.48	0.76	0.98	0.17	0.36	1.63	1.385	0.492	1.587	4.463	1.168	1.543	0.514
Escherichia coli	0.06	0.4	1.98	0.05	0.12	0.04	5.16	0.11	0.02	5.6	0.21	0.23	0.42	7.89	0.42	0.36	2.52	0.13	0.9	0.41	0.89	0.1	0.18	0.39	0.13	0.9	0.1	3.67	0.33	0.42	1.12	0.02	3.58	0.5	1.02	0.09	0.14	0.23	0.01	0.07	0.52	1.05	0.487	0.086	0.27	0.044	0.253	0.046	0.057
Bifidobacterium adolescentis	0.04	3.55	0.57	0	0.02	3.22	0.01	0.06	2.32	0.08	0.01	0.01	1.86	0.01	0.18	0.37	0.48	0.01	0.01	9.6	0.01	0.04	1.8	2.28	0	0.01	3.93	0.01	0.04	0.26	0.65	0.01	0.01	3.9	0.01	0.04	0.37	0.92	0	0.14	5.51	0.01	0.024	2.617	0.126	0.003	0.094	0.025	1.01
Bifidobacterium bifidum	0.04	4.96	0	3.46	0.01	1.37	0.33	0.04	1.96	0.01	4.7	0.01	0.71	2.48	0.16	0.96	0.01	3.33	0.01	3.24	0.01	0.04	1.71	0.01	1.02	0.01	1.15	0.03	0.02	1.37	0.01	1.07	0	0.98	0.37	0.02	0.37	0.01	1.88	0.04	3.01	0.32	0.006	0.087	0.062	0.003	0.073	0.013	0.079
[Eubacterium] eligens	0.4	0.1	1.38	0.78	0.44	0.13	0.29	0.46	0.42	1.3	0.99	0.51	0.48	0.54	0.49	0.35	0.63	2.59	0.63	0.54	0.29	2.71	0.37	0.83	0.69	2.8	0.72	0.26	0.64	0.23	3.62	0.31	0.96	0.96	0.28	1.68	0.17	1.52	1.04	0.67	0.22	0.15	1.082	0.446	7.103	0.167	1.19	1.085	0.43
Paraprevotella xylaniphila	0.16	0.06	1.26	0.08	7.22	0.4	0.23	0.14	0.62	1.91	0.05	2.47	0.2	0.02	0.07	0.27	1.42	0.08	1.52	0.01	0.17	0.3	1.04	1.77	0.19	1.91	0.24	0.05	0.36	0.37	2.05	0.23	2.05	0.18	0.14	0.34	1.39	1.92	0.14	0.19	0.07	0.08	0.145	1.12	0.08	0.41	0.322	0.05	1.061
Bacteroides intestinalis	0.3	0.01	0.42	0.04	1.87	3.25	0.3	0.17	0.19	0.6	0.02	1.43	1.15	0.03	0.1	0.03	1.27	0.02	0.51	0.04	0.22	0.91	0.26	4.54	0.1	1.01	0.86	0.07	0.64	0.02	0.56	0.07	1.18	0.93	0.2	0.21	0.48	3.05	0.05	0.24	0.43	0.1	0.563	0.406	0.59	14.608	0.639	0.251	0.404
Clostridioides difficile	0.69	0.37	0.5	1.24	0.4	0.16	0.35	0.65	0.25	0.34	1.25	0.44	0.3	1.39	0.61	0.39	0.45	2.32	0.73	0.57	0.58	0.75	0.24	0.52	0.86	0.44	0.31	1.17	0.54	0.18	0.49	0.85	0.5	0.36	0.65	0.46	0.23	0.67	1.97	0.94	0.41	0.7	0.402	0.484	0.504	0.224	0.571	0.608	0.486
Lachnospiraceae bacterium Choco86	0.56	0.63	0.43	1.14	0.4	0.16	0.47	0.62	0.4	0.24	0.61	0.54	0.34	2.03	0.67	0.64	0.4	1.14	0.99	0.99	0.47	0.48	0.34	0.4	0.51	0.51	0.3	1.72	0.44	0.4	0.39	0.39	0.63	0.41	0.95	0.43	0.2	0.44	1.06	1.39	0.48	1.06	0.511	0.809	0.693	0.496	0.995	0.536	0.782
Bacteroides salanitronis	0.25	0.01	0.71	0.04	2.21	0.93	1.48	0.1	0.28	0.87	0.02	2.66	0.65	0.13	0.05	0.01	0.77	0.03	0.87	0.02	1.15	0.36	0.31	0.41	0.07	1.98	0.61	0.25	0.6	0.03	0.93	0.06	2.13	0.41	0.94	0.52	0.61	0.76	0.04	0.4	0.15	0.33	0.297	1.003	0.358	1.119	1.754	0.155	0.977
Bacteroides cellulosilyticus	0.24	0.01	0.7	0.07	1.31	3.51	0.54	0.3	0.19	1.03	0.03	0.8	2.13	0.08	0.08	0.02	0.99	0.03	0.31	0.05	0.35	0.99	0.24	1.49	0.22	0.61	1.23	0.14	0.35	0.01	0.7	0.13	0.87	1.07	0.46	0.44	0.45	2.02	0.07	0.11	0.44	0.19	1.3	0.416	0.386	0.934	0.662	0.221	0.427
Odoribacter splanchnicus	0.44	0.01	2.09	0.14	1.16	1.07	0.15	0.16	0.06	1.79	0.05	0.97	0.7	0.12	0.11	0.02	2.69	0.05	0.61	0.05	0.17	0.54	0.08	0.87	0.22	0.71	0.56	0.15	1.08	0.03	1.14	0.14	1.92	0.53	0.49	0.58	0.1	1.26	0.12	0.09	0.25	0.21	0.968	1.158	0.024	1.165	0.837	0.287	1.432
Prevotella ruminicola	0.08	0.04	2.31	0.01	0.12	0.05	0.06	0.03	1.75	2.75	0	0.12	0.03	0.01	0.04	0.01	1.81	0.02	0.04	0.01	0.05	0.28	2.45	0.77	0.01	0.1	0.03	0.01	0.48	0.03	2.9	0.01	0.15	0.02	0.04	0.36	5.24	1.38	0.01	0.02	0.01	0.01	0.017	2.827	0.013	0.03	0.091	0.005	2.783
Ruthenibacterium lactatiformans	0.42	0.09	0.14	0.35	0.14	0.34	0.26	0.98	0.08	0.15	0.18	0.18	0.42	2.2	0.64	0.21	0.14	0.65	0.3	0.35	1.19	0.59	0.1	0.35	0.36	0.2	0.33	0.94	0.61	0.06	0.16	0.26	0.36	0.47	0.86	0.9	0.04	0.39	0.71	0.28	0.52	3.06	0.354	0.248	0.282	0.13	0.16	0.115	0.313
Ruminococcus bicirculans	0.12	0.02	1.11	0.06	0.04	6.16	0.08	0.11	0.02	1.06	0.09	0.03	2.29	0.12	0.08	0.04	2.46	0.34	0.08	0.21	0.07	1.21	0.03	0.73	0.05	0.05	0.13	0.07	0.39	0.01	1.83	0.06	0.05	0.13	0.05	0.06	0.02	0.63	0.15	0.07	0.22	0.04	0.605	1.928	1.105	0.013	2.588	0.064	2.136
Alistipes finegoldii	0.25	0.01	1.12	0.2	0.44	1.15	0.73	0.97	0.05	1.43	0.07	0.33	0.72	0.13	0.49	0.03	1.35	0.08	0.26	0.07	0.28	1.13	0.07	0.89	0.36	0.28	0.49	0.23	0.84	0.02	0.52	0.19	0.69	0.68	0.8	0.55	0.06	1.24	0.13	0.05	0.42	0.63	1.457	0.571	0.073	1.131	0.31	0.111	0.688
Haemophilus parainfluenzae	0.17	0.5	0.15	0.02	0.08	0	0.31	0.02	0.63	0.08	0.01	0.37	0.02	0.17	0.02	2.35	0.31	0.06	0.91	0	1.16	0.07	0.4	0.08	0	4.41	0	1.82	0.5	0.91	0.48	0	0.35	0	0.61	0.08	0.52	0.02	0.01	1.11	0.02	0.91	0.052	0.018	0.448	0.006	0.12	0.436	0.015
Alistipes sp. 6CPBBH3	0.12	0.01	1.12	0.33	0.78	3.04	0.05	0.29	0.07	1.53	0.05	0.33	1.48	0.01	0.08	0.02	1.61	0.08	0.43	0.13	0.05	0.24	0.08	1.84	0.6	0.23	0.55	0.01	0.07	0.01	0.51	0.16	0.68	0.43	0.03	0.19	0.04	0.95	0.11	0.04	0.34	0.02	0.404	0.356	0.035	0.193	0.109	0.047	0.398
Blautia hansenii	0.24	0.2	0.22	2.16	0.19	0.09	0.27	0.23	0.18	0.15	0.81	0.29	0.16	1.27	0.22	0.24	0.23	1.36	0.36	0.41	0.34	0.19	0.15	0.22	0.78	0.4	0.15	1.38	0.18	0.14	0.22	0.53	0.36	0.22	0.53	0.16	0.1	0.26	1.29	0.9	0.22	0.71	0.258	0.343	0.349	0.236	0.472	0.241	0.329
Bacteroides caecimuris	0.15	0.02	0.48	0.36	0.98	1.14	0.48	0.17	0.23	0.67	0.2	1.06	0.67	0.1	0.06	0.02	0.68	0.18	0.38	0.05	0.5	0.33	0.33	0.42	0.62	0.68	0.63	0.19	0.4	0.03	0.7	0.82	0.84	0.58	0.62	0.32	0.45	0.51	0.36	0.12	0.31	0.41	0.755	0.394	0.365	1.236	0.469	0.474	0.398
Clostridiales bacterium CCNA10	0.38	0.13	0.32	0.41	0.19	1.45	0.27	0.39	0.17	0.3	0.4	0.24	0.3	0.42	0.31	0.33	0.33	0.64	0.38	0.32	0.46	0.48	0.2	0.38	0.31	0.27	0.67	0.47	0.52	0.07	0.29	0.35	0.31	0.52	0.44	0.46	0.08	0.46	0.72	0.33	0.38	0.35	0.46	0.354	0.483	0.475	0.326	0.307	0.523
Megamonas hypermegale	3.65	0	0.01	0.01	0.01	0.06	0	2.15	0	0.01	0	0.01	0.43	0.01	0.93	0	0.01	0.01	0.01	0.13	0.01	2.22	0	0.01	0	0.01	0.27	0.01	2.66	0	0.01	0.01	0.01	1.1	0	1.18	0	0.01	0.01	0.01	0.85	0.01	0.008	0.208	2.976	0.005	0.006	1.092	0.217
Phascolarctobacterium faecium	0.16	0.16	0.07	0.66	0.02	0.04	0.5	0.37	1.5	0.03	0.27	0.02	0.09	1.08	0.15	1.42	0.1	0.54	0.02	0.02	0.4	0.44	0.63	0.06	0.78	0.04	0.41	0.96	0.1	0.18	0.02	0.36	0	0.09	0.66	0.08	1.56	0.02	1.37	0.01	0.07	0.26	0.763	0.007	0.034	0.003	0.039	0.103	0.007
Prevotella intermedia	0.09	0.03	1.48	0.01	0.18	0.06	0.08	0.04	1.2	1.74	0.01	0.16	0.04	0.01	0.04	0	1.16	0.02	0.07	0.01	0.06	0.29	1.72	0.51	0.02	0.13	0.04	0.02	0.4	0.02	1.57	0.02	0.23	0.03	0.04	0.28	3.05	0.8	0.01	0.02	0.01	0.02	0.031	1.656	0.024	0.081	0.073	0.02	1.595
Flavonifractor plautii	0.14	0.05	0.16	0.19	0.31	0.07	0.22	0.35	0.05	0.15	0.12	0.34	0.19	0.7	0.15	0.09	0.25	0.18	0.16	0.24	0.71	0.23	0.07	0.41	0.21	0.09	0.64	0.81	0.33	0.03	0.2	0.5	0.66	0.43	1.26	0.55	0.02	0.44	0.83	0.33	0.27	2.51	0.252	0.192	0.367	0.36	0.155	0.149	0.335
Enterobacter cloacae	0.01	0	0.03	0.01	0.01	0	0.01	0.55	0.02	2.23	1.13	3.95	0.9	2.1	0.24	2.5	0.01	0.01	0.05	0.47	0.02	0.01	0.3	0.01	0.01	0.01	0.03	0.06	0.01	0.09	0.01	0	0.01	0	0.01	0.02	0.1	0.02	0.01	0.01	0.11	0.04	0.012	0.016	0.024	0.048	0.022	0.008	0.016
Parabacteroides sp. CT06	0.06	0	0.22	0.47	0.43	2.39	0.69	0.09	0.06	0.27	0.36	0.6	2.52	0.04	0.03	0.02	0.35	0.48	0.25	0.07	0.19	0.14	0.09	0.81	1.16	0.21	0.58	0.04	0.08	0.01	0.22	0.15	0.13	0.76	0.1	0.05	0.04	0.31	0.1	0.02	0.31	0.04	0.249	0.047	0.047	0.352	0.066	0.066	0.049
Butyricimonas faecalis	0.22	0.01	0.95	0.11	0.82	0.74	0.36	0.14	0.42	0.92	0.11	0.31	0.51	0.05	0.07	0.01	1.18	0.09	0.16	0.03	0.23	0.36	0.59	0.53	0.17	0.21	0.46	0.14	0.48	0.01	0.61	0.18	0.41	0.46	0.28	0.27	0.94	0.71	0.09	0.02	0.24	0.24	0.488	1.478	0.095	0.382	0.093	0.168	1.612
Mordavella sp. Marseille-P3756	0.22	0.11	0.15	0.89	0.16	0.08	0.15	0.37	0.09	0.1	0.77	0.32	0.12	0.58	0.23	0.17	0.12	1.21	0.53	0.28	0.2	0.37	0.09	0.14	0.73	0.28	0.15	0.34	0.4	0.07	0.14	0.59	0.33	0.18	0.32	0.36	0.06	0.2	1.91	0.71	0.18	0.34	0.108	0.169	0.349	0.109	0.164	0.295	0.176
Prevotella melaninogenica	0.06	0.03	1.53	0	0.07	0.02	0.02	0.02	1.29	1.82	0	0.06	0.01	0.01	0.03	0	1.2	0.01	0.02	0	0.02	0.21	1.81	0.52	0	0.05	0.01	0.01	0.27	0.01	1.49	0	0.06	0.01	0.01	0.2	2.93	0.71	0	0.01	0	0.01	0.01	1.391	0.009	0.021	0.032	0.002	1.356
Prevotella oris	0.05	0.03	1.44	0	0.07	0.02	0.02	0.02	1.24	1.7	0	0.06	0.01	0.01	0.03	0	1.13	0.01	0.02	0	0.02	0.2	1.65	0.5	0	0.05	0.01	0	0.28	0.02	1.55	0	0.09	0.01	0.01	0.2	3.2	0.76	0	0.01	0	0.01	0.013	1.569	0.007	0.018	0.038	0.004	1.467
Dysosmobacter welbionis	0.45	0.15	0.29	0.52	0.23	0.26	0.28	0.6	0.16	0.41	0.26	0.21	0.41	0.64	0.45	0.28	0.34	0.38	0.49	0.46	0.39	0.55	0.21	0.5	0.29	0.23	0.31	0.39	0.43	0.06	0.2	0.2	0.29	0.3	0.29	0.44	0.04	0.42	0.43	0.25	0.35	0.34	0.462	0.272	0.327	0.126	0.155	0.202	0.355
Prevotella dentalis	0.05	0.03	1.38	0	0.09	0.03	0.04	0.02	1.17	1.66	0	0.06	0.02	0.01	0.03	0	1.05	0.01	0.02	0	0.03	0.18	1.63	0.43	0.01	0.06	0.02	0.01	0.25	0.02	1.45	0.01	0.11	0.01	0.02	0.2	3.08	0.71	0.01	0.01	0.01	0.01	0.011	1.536	0.005	0.035	0.044	0.008	1.502
[Clostridium] bolteae	0.33	0.12	0.21	0.61	0.16	0.08	0.51	0.39	0.13	0.16	0.27	0.23	0.23	0.72	0.23	0.16	0.19	0.47	0.26	0.21	0.52	0.27	0.09	0.22	0.31	0.17	0.21	0.71	0.28	0.06	0.14	0.4	0.4	0.27	1.45	0.24	0.08	0.18	0.73	0.28	0.34	0.65	0.375	0.152	0.465	0.882	0.189	0.138	0.183
Longibaculum sp. KGMB06250	0.56	0.3	0.32	0.51	0.32	0.12	0.37	0.64	0.27	0.2	0.41	0.31	0.22	1.48	0.46	0.57	0.29	0.61	0.47	0.38	0.5	0.57	0.19	0.31	0.23	0.56	0.07	0.28	0.15	0.07	0.08	0.06	0.13	0.06	0.13	0.18	0.05	0.09	0.18	0.21	0.06	0.22	0.118	0.067	0.127	0.084	0.155	0.107	0.062
Phascolarctobacterium succinatutens	0.12	0.14	0.04	0.56	0.01	0.03	0.4	0.28	1.21	0.02	0.22	0.02	0.07	0.88	0.11	1.19	0.06	0.43	0.01	0.02	0.32	0.34	0.51	0.03	0.64	0.03	0.33	0.82	0.08	0.17	0.01	0.31	0	0.08	0.54	0.06	1.32	0.01	1.15	0	0.06	0.23	0.828	0.007	0.029	0.004	0.04	0.079	0.007
Prevotella fusca	0.05	0.02	1.08	0	0.07	0.04	0.04	0.01	1.04	1.28	0	0.07	0.02	0.01	0.02	0	0.85	0.01	0.03	0	0.03	0.16	1.41	0.35	0	0.06	0.02	0.01	0.22	0.01	1.06	0	0.08	0.01	0.02	0.16	2.41	0.52	0	0.01	0.01	0.01	0.008	1.124	0.005	0.019	0.041	0.008	1.099
Clostridium sporogenes	0.25	0.24	0.21	0.56	0.26	0.1	0.22	0.25	0.2	0.13	0.38	0.27	0.17	1.41	0.21	0.45	0.16	0.66	0.36	0.34	0.35	0.24	0.13	0.17	0.48	0.5	0.08	0.37	0.06	0.09	0.07	0.2	0.15	0.1	0.12	0.05	0.05	0.07	0.38	0.32	0.07	0.31	0.129	0.125	0.115	0.055	0.137	0.17	0.121
Bifidobacterium catenulatum	0.15	3.15	0.02	0.01	0.06	0.06	0	0.25	2.01	0.01	0.01	0.05	0.03	0.01	0.81	0.39	0.01	0.02	0.03	0.23	0.01	0.17	1.57	0.03	0.01	0.03	0.08	0	0.19	0.22	0.01	0.01	0.02	0.05	0	0.19	0.53	0.02	0.01	0.61	0.08	0	0.01	0.028	0.404	0.003	0.395	0.009	0.017
Alistipes sp. 5CBH24	0.21	0	0.58	0.2	0.55	1.1	0.03	0.84	0.03	0.73	0.03	0.2	0.64	0.01	0.17	0.01	0.79	0.05	0.23	0.07	0.03	0.86	0.04	0.79	0.36	0.12	0.25	0.01	0.11	0	0.25	0.09	0.39	0.21	0.02	0.22	0.02	0.47	0.07	0.03	0.16	0.02	0.297	0.238	0.011	0.048	0.045	0.022	0.258
Prevotella denticola	0.05	0.02	1.11	0	0.1	0.04	0.04	0.02	0.75	1.32	0	0.08	0.03	0.01	0.02	0	0.85	0.01	0.03	0	0.03	0.16	1.06	0.36	0	0.07	0.02	0.01	0.21	0.01	1.09	0	0.11	0.01	0.03	0.16	1.76	0.52	0	0.01	0.01	0.01	0.015	1.153	0.007	0.032	0.054	0.007	1.141
Blautia sp. N6H1-15	0.14	0.17	0.15	0.46	0.12	0.06	0.23	0.18	0.18	0.09	0.25	0.17	0.09	1.07	0.16	0.21	0.15	0.42	0.18	0.25	0.24	0.15	0.11	0.13	0.23	0.13	0.08	1.12	0.14	0.11	0.13	0.18	0.14	0.12	0.5	0.12	0.05	0.15	0.46	0.37	0.13	0.57	0.145	0.221	0.303	0.145	0.306	0.147	0.208
Lactobacillus plantarum	0.01	0.02	0.04	0.01	0.01	0.01	0.01	0.33	0.25	0.06	0.51	1.22	0.02	0.17	0.73	0.07	0.2	1.25	0.09	0.05	0.36	0.2	0.23	0.14	0.07	0.01	0.03	0.18	1.09	0.05	0.1	0.1	0.01	0.01	0.36	0.08	0.61	0.11	0.06	0.19	0.01	0.52	0.002	0.02	0.002	0.004	0.007	0.002	0.017
Alistipes sp. Marseille-P5997	0.18	0	0.56	0.11	0.22	0.29	0.37	0.11	0.04	0.61	0.01	0.16	0.25	0.03	0.09	0.01	0.55	0.03	0.13	0.03	0.25	0.49	0.05	0.34	0.19	0.13	0.26	0.05	0.68	0.01	0.48	0.09	0.39	0.24	0.21	0.61	0.08	0.54	0.07	0.02	0.14	0.07	0.191	0.479	0.081	0.114	0.117	0.061	0.526
Akkermansia muciniphila	1.34	0.01	0.89	0.04	0.01	0.62	0.01	0.24	0.01	0.3	0.03	0.02	0.12	0.01	0.5	0.02	0.5	0.03	0.02	0.02	0.01	0.08	0.02	0.39	0.01	0.01	0.06	0.01	0.14	0.01	0.2	0.01	0.02	0.02	0.01	0.03	0.03	0.82	0.05	0.02	2.43	0.01	0.061	0.049	0.016	0.015	0.022	0.038	0.053
[Clostridium] scindens	0.41	0.21	0.15	0.39	0.08	0.05	0.14	0.25	0.15	0.08	0.19	0.15	0.1	0.8	0.28	0.21	0.15	0.37	0.18	0.27	0.21	0.2	0.14	0.14	0.15	0.1	0.09	0.61	0.16	0.13	0.13	0.11	0.12	0.14	0.43	0.15	0.1	0.15	0.31	0.29	0.16	0.4	0.213	0.251	0.291	0.207	0.18	0.172	0.245
Bacteroides helcogenes	0.08	0	0.28	0.06	0.53	0.48	0.35	0.06	0.14	0.39	0.02	0.57	0.32	0.04	0.03	0	0.33	0.02	0.24	0.02	0.26	0.17	0.18	0.17	0.11	0.43	0.54	0.09	0.13	0.01	0.36	0.07	0.74	0.22	0.22	0.11	0.37	0.28	0.05	0.07	0.08	0.1	0.707	0.319	0.064	0.826	0.779	0.276	0.316
Klebsiella pneumoniae	0.06	0.02	0.28	0.38	0.07	0.04	0.09	0.03	0.02	0.12	0.01	0.05	0.1	0.13	0.07	4.32	0.03	0.14	0.63	0.1	0.04	0.05	0.15	0.03	0.04	0.12	0.01	0.74	0.02	0.38	0.01	0.03	0.04	0.01	0.01	0	0.1	0.02	0.01	0.01	0.1	0.1	0.254	0.02	0.04	0.006	0.214	0.653	0.009
Eggerthella lenta	0.63	0.13	0.03	0.2	0.02	0.03	0.1	0.28	0.01	0.01	0.07	0.02	0.04	0.96	1.01	0.09	0.03	0.07	0.03	0.28	0.22	0.22	0.08	0.04	0.06	0.01	0.09	0.22	0.19	0.04	0.02	0.06	0.03	0.21	1.01	0.27	0.01	0.03	0.07	0.03	0.23	0.58	0.016	0.013	0.154	0.033	0.033	0.013	0.017
Adlercreutzia equolifaciens	0.01	0.53	0.35	0	0.25	0.1	0.01	0.01	0.1	0.05	0.01	0.06	0.2	0.01	0.02	0.49	0.2	0.01	0.21	1.18	0.01	0.01	0.27	0.23	0	0.03	0.32	0.01	0.01	0.02	0.08	0	0.3	0.62	0.01	0.02	0.09	0.11	0.01	0.33	0.83	0.01	0.038	0.031	0.007	0.025	0.008	0.012	0.054
Alistipes sp. 3BBH6	0.07	0	0.47	0.17	0.11	0.5	0.04	0.16	0	0.6	0.04	0.05	0.32	0.03	0.09	0	0.62	0.05	0.07	0.04	0.02	0.25	0.01	0.5	0.36	0.04	0.13	0.01	0.13	0	0.17	0.27	0.15	0.26	0.11	0.1	0.01	0.39	0.3	0.01	0.17	0.1	0.268	0.298	0.008	0.115	0.041	0.079	0.415
Lachnoclostridium sp. YL32	0.25	0.11	0.1	0.3	0.09	0.03	0.12	0.38	0.12	0.07	0.17	0.11	0.07	0.51	0.21	0.12	0.09	0.32	0.12	0.14	0.19	0.19	0.07	0.09	0.15	0.09	0.07	0.41	0.2	0.05	0.08	0.12	0.1	0.11	0.31	0.15	0.07	0.11	0.29	0.2	0.11	0.25	0.144	0.128	0.204	0.172	0.132	0.13	0.139
Lachnoclostridium phocaeense	0.16	0.13	0.13	0.24	0.12	0.06	0.1	0.17	0.11	0.09	0.14	0.12	0.12	0.38	0.2	0.16	0.12	0.27	0.15	0.29	0.11	0.15	0.09	0.11	0.11	0.11	0.11	0.3	0.15	0.09	0.12	0.09	0.11	0.17	0.2	0.13	0.05	0.13	0.24	0.24	0.18	0.2	0.176	0.199	0.2	0.135	0.149	0.139	0.221
Bacteroides heparinolyticus	0.06	0	0.27	0.04	0.38	0.37	0.21	0.05	0.14	0.36	0.01	0.43	0.24	0.02	0.02	0	0.29	0.01	0.18	0.01	0.15	0.12	0.2	0.15	0.07	0.32	0.31	0.04	0.1	0.01	0.27	0.03	0.43	0.14	0.13	0.09	0.35	0.22	0.03	0.04	0.05	0.06	0.37	0.251	0.049	0.478	0.49	0.136	0.248
Prevotella scopos	0.03	0.01	0.75	0	0.05	0.02	0.01	0.01	0.57	0.86	0	0.05	0.01	0	0.01	0	0.57	0.01	0.02	0	0.01	0.1	0.78	0.23	0	0.04	0.01	0	0.11	0.01	0.59	0	0.04	0.01	0.01	0.08	1.08	0.28	0	0.01	0	0	0.007	0.604	0.006	0.013	0.018	0.002	0.572
Barnesiella viscericola	0.05	0	0.39	0.03	0.19	0.28	0.3	0.04	0.13	0.51	0.02	0.2	0.14	0.03	0.02	0	0.46	0.02	0.08	0.01	0.22	0.11	0.18	0.28	0.07	0.15	0.12	0.07	0.15	0	0.39	0.04	0.22	0.09	0.18	0.11	0.35	0.43	0.03	0.02	0.09	0.09	0.073	0.332	0.098	0.162	0.188	0.041	0.327
Intestinimonas butyriciproducens	0.24	0.04	0.14	0.08	0.06	0.13	0.05	0.35	0.05	0.22	0.08	0.07	0.09	0.08	0.2	0.08	0.16	0.13	0.1	0.08	0.09	0.35	0.08	0.32	0.05	0.08	0.13	0.07	0.64	0.03	0.19	0.05	0.14	0.12	0.1	0.24	0.03	0.43	0.17	0.12	0.1	0.09	0.305	0.266	0.143	0.226	0.081	0.12	0.413
Faecalitalea cylindroides	0.32	0.08	0.13	0.19	0.05	0.04	0.13	0.26	0.07	0.06	0.1	0.08	0.08	0.55	0.3	0.12	0.1	0.18	0.11	0.16	0.17	0.2	0.04	0.12	0.06	0.06	0.06	0.44	0.17	0.04	0.09	0.06	0.08	0.07	0.27	0.15	0.02	0.14	0.12	0.16	0.09	0.29	0.128	0.168	0.179	0.15	0.139	0.051	0.129
Blautia producta	0.14	0.13	0.12	0.41	0.07	0.03	0.08	0.15	0.12	0.08	0.13	0.11	0.06	0.39	0.16	0.16	0.1	0.26	0.11	0.15	0.11	0.1	0.1	0.09	0.13	0.08	0.06	0.27	0.1	0.09	0.12	0.17	0.09	0.1	0.21	0.09	0.07	0.12	0.31	0.24	0.09	0.23	0.126	0.172	0.216	0.114	0.216	0.133	0.167
Bacteroides zoogleoformans	0.05	0	0.25	0.03	0.36	0.29	0.21	0.03	0.15	0.32	0.02	0.41	0.19	0.02	0.02	0	0.26	0.02	0.17	0.01	0.15	0.1	0.21	0.14	0.06	0.31	0.25	0.04	0.09	0.01	0.26	0.04	0.39	0.1	0.11	0.08	0.37	0.2	0.02	0.05	0.04	0.05	0.252	0.288	0.035	0.392	0.405	0.115	0.278
Alistipes sp. 5CPEGH6	0.08	0	0.33	0.15	0.14	0.33	0.02	0.13	0.02	0.33	0.02	0.07	0.27	0	0.06	0.01	0.44	0.04	0.11	0.04	0.01	0.16	0.03	0.35	0.26	0.05	0.25	0.01	0.15	0	0.23	0.14	0.32	0.27	0.02	0.25	0.04	0.47	0.09	0.01	0.16	0.01	0.267	0.382	0.043	0.263	0.175	0.034	0.448
Prevotella enoeca	0.03	0.01	0.6	0	0.05	0.02	0.01	0.01	0.51	0.71	0	0.04	0.01	0	0.01	0	0.46	0	0.01	0	0.01	0.09	0.67	0.2	0	0.03	0.01	0	0.11	0.01	0.55	0	0.06	0.01	0.01	0.08	1.16	0.28	0	0	0	0	0.008	0.567	0.005	0.018	0.024	0.004	0.529
Prevotella jejuni	0.02	0.01	0.62	0	0.05	0.01	0.03	0.01	0.49	0.73	0	0.05	0.01	0.01	0.01	0	0.48	0.01	0.02	0	0.02	0.08	0.65	0.2	0	0.04	0.01	0.01	0.1	0.01	0.56	0	0.04	0.01	0.01	0.07	1.07	0.28	0	0.01	0	0.01	0.008	0.585	0.005	0.014	0.02	0.002	0.556
Streptococcus pasteurianus	0.04	0.04	0.03	0.5	0.06	0.01	0.02	0.04	0.03	0.01	1.76	0.04	0.02	0.11	0.04	0.04	0.02	0.96	0.02	0.05	0.03	0.05	0.02	0.02	0.18	0.02	0.02	0.1	0.03	0.02	0.01	0.18	0.03	0.02	0.04	0.02	0.01	0.02	0.11	0.73	0.03	0.06	0.02	0.03	0.047	0.009	0.042	0.023	0.027
Fusobacterium mortiferum	0	0	0.01	0.93	0.25	0	0	0	0.01	0.01	0.42	1.92	0	0.01	0	0	0	0.01	0.01	0	0	0	0.01	0	0.16	0.15	0	0.01	0	0	0.01	1.03	0.07	0	0	0	0.02	0.01	0.11	0.27	0	0	0.004	0.044	0.01	0.002	0.003	0.004	0.036
Oscillibacter sp. PEA192	0.09	0.03	0.13	0.15	0.1	0.15	0.1	0.15	0.05	0.3	0.08	0.07	0.15	0.12	0.08	0.05	0.22	0.09	0.11	0.1	0.15	0.19	0.05	0.3	0.11	0.07	0.13	0.08	0.17	0.01	0.09	0.09	0.11	0.11	0.1	0.12	0.01	0.24	0.13	0.04	0.08	0.13	0.145	0.121	0.057	0.101	0.05	0.073	0.19
Cloacibacillus porcorum	0.46	0	0.02	0	0	0	0	0.28	0	0.01	0	0	0.01	0	1.06	0.01	0.02	0.01	0.01	0	0	1.4	0.01	0.02	0	0	0.01	0	0.84	0	0.01	0.01	0.01	0.01	0	0.23	0	0.02	0.02	0.01	0.02	0	0.038	0.009	0.007	0.013	0.007	0.004	0.012
Streptococcus gallolyticus	0.29	0.22	0.04	0.23	0.07	0.01	0.19	0.27	0.07	0.04	0.61	0.09	0.05	0.06	0.18	0.35	0.03	0.43	0.22	0.15	0.05	0.3	0.05	0.04	0.15	0.25	0	0	0	0	0	0.01	0	0	0	0	0	0	0.01	0.03	0	0.01	0.001	0.005	0.033	0.001	0.002	0.001	0.005
Lachnospiraceae bacterium KGMB03038	0.09	0.1	0.09	0.17	0.05	0.03	0.08	0.1	0.07	0.05	0.1	0.08	0.05	0.31	0.1	0.11	0.09	0.18	0.09	0.13	0.08	0.1	0.06	0.08	0.08	0.06	0.04	0.27	0.1	0.06	0.08	0.06	0.07	0.06	0.15	0.08	0.03	0.09	0.16	0.16	0.07	0.16	0.112	0.134	0.133	0.102	0.123	0.089	0.138
Veillonella parvula	0.05	0.28	0.02	0	0.01	0	0.04	0.04	0.55	0.01	0.01	0.01	0.04	0.02	0.04	0.05	0.02	0.01	0.05	0.02	0.26	0.03	0.36	0.02	0.01	0.59	0.01	0.11	0.07	0.19	0.01	0.03	0.02	0.01	0.2	0.03	0.15	0.01	0.01	0.06	0.01	0.24	0.015	0.02	0.476	0.005	0.025	0.116	0.017
Hungatella hathewayi	0.07	0.06	0.08	0.15	0.05	0.02	0.06	0.08	0.07	0.06	0.1	0.08	0.05	0.18	0.06	0.09	0.08	0.17	0.08	0.09	0.08	0.06	0.05	0.07	0.09	0.06	0.05	0.13	0.08	0.04	0.09	0.09	0.07	0.08	0.13	0.06	0.04	0.09	0.23	0.15	0.06	0.1	0.093	0.107	0.127	0.14	0.103	0.114	0.123
Ruminococcus sp. JE7A12	0.04	0.01	0.05	0.06	0.04	0.03	0.01	0.08	0.03	0.04	0.24	0.03	0.04	0.03	0.04	0.03	0.05	0.98	0.12	0.1	0.04	0.05	0.03	0.03	0.11	0.05	0.05	0.03	0.05	0.01	0.06	0.17	0.05	0.06	0.02	0.03	0.06	0.06	0.39	0.06	0.09	0.01	0.061	0.099	0.018	0.008	0.16	0.015	0.062
Cronobacter dublinensis	0	0	0	0	0	0	0	0	0	0	0	0	0	0	0	0	0	0	0	0	3.49	0	0	0	0	0	0	0	0	0	0	0	0	0	0	0	0	0	0	0	0	0	0.001	0.001	0.001	1e-05	1e-05	0.001	0.001
Bifidobacterium breve	0.09	0.53	0.02	0.09	0.02	0.03	0.01	0.1	0.34	0.01	0.2	0.02	0.02	0.07	0.31	0.09	0.02	0.19	0.02	0.09	0.02	0.1	0.26	0.03	0.04	0.02	0.03	0.05	0.04	0.05	0.02	0.03	0.01	0.03	0.02	0.04	0.08	0.02	0.07	0.16	0.05	0.02	0.026	0.024	0.153	0.011	0.03	0.009	0.023
Eubacterium limosum	0.21	0.04	0.06	0.11	0.03	0.02	0.05	0.24	0.06	0.04	0.06	0.04	0.03	0.17	0.26	0.05	0.05	0.11	0.07	0.07	0.04	0.2	0.03	0.05	0.04	0.04	0.02	0.12	0.22	0.02	0.04	0.03	0.06	0.03	0.1	0.16	0.01	0.06	0.07	0.06	0.05	0.1	0.059	0.03	0.093	0.027	0.062	0.02	0.031
Blautia sp. YL58	0.11	0.12	0.16	0.38	0.09	0	0.04	0.17	0.09	0	0.18	0.13	0.04	0.33	0.16	0.15	0.09	0.33	0.09	0.09	0.03	0.06	0.05	0.16	0.16	0.04	0	0	0	0	0	0	0	0	0	0	0	0	0	0	0	0	1e-05	1e-05	1e-05	1e-05	1e-05	1e-05	1e-05
Veillonella dispar	0.04	0.28	0.01	0	0.01	0	0.03	0.01	0.51	0.01	0	0	0.05	0.01	0.02	0.03	0.01	0.01	0.03	0.01	0.29	0.04	0.36	0.01	0	0.54	0	0.05	0.03	0.23	0.01	0.01	0.01	0.01	0.21	0.02	0.06	0	0	0.03	0.01	0.26	0.017	0.017	0.418	0.003	0.058	0.126	0.015
Monoglobus pectinilyticus	0.08	0.01	0.06	0.06	0.05	0.03	0.04	0.06	0.02	0.03	0.03	0.05	0.05	0.37	0.08	0.02	0.06	0.07	0.12	0.17	0.08	0.05	0.02	0.08	0.03	0.05	0.04	0.23	0.06	0.01	0.06	0.02	0.06	0.06	0.18	0.04	0.03	0.09	0.09	0.12	0.1	0.24	0.035	0.059	0.031	0.022	0.041	0.019	0.051
Clostridium sp. SY8519	0.07	0.08	0.06	0.13	0.04	0.02	0.04	0.1	0.07	0.03	0.08	0.06	0.05	0.11	0.09	0.09	0.06	0.12	0.07	0.13	0.04	0.12	0.05	0.06	0.06	0.05	0.05	0.09	0.07	0.06	0.07	0.05	0.06	0.07	0.07	0.06	0.06	0.07	0.16	0.14	0.06	0.07	0.086	0.102	0.116	0.074	0.09	0.103	0.093
Prevotella sp. oral taxon 299	0.01	0.01	0.29	0	0.04	0.02	0.01	0.01	0.24	0.34	0	0.04	0.01	0	0.01	0	0.22	0	0.01	0	0.01	0.04	0.35	0.1	0	0.03	0.01	0	0.06	0	0.31	0	0.05	0.01	0.01	0.05	0.6	0.15	0	0.01	0	0	0.006	0.337	0.006	0.015	0.019	0.003	0.322
[Eubacterium] cellulosolvens	0.06	0.06	0.08	0.16	0.04	0.02	0.03	0.07	0.06	0.05	0.09	0.07	0.04	0.13	0.07	0.08	0.08	0.16	0.08	0.09	0.04	0.06	0.05	0.06	0.07	0.06	0.03	0.07	0.06	0.04	0.08	0.06	0.06	0.05	0.08	0.06	0.03	0.08	0.17	0.14	0.05	0.08	0.08	0.099	0.096	0.048	0.099	0.055	0.098
Campylobacter jejuni	0.06	0.24	0.05	0.23	0.02	0.01	0.01	0.08	0.15	0.04	0.12	0.06	0.03	0.05	0.11	0.17	0.04	0.29	0.07	0.09	0.08	0.16	0.13	0.04	0.11	0.04	0.01	0.02	0.02	0.05	0.02	0.07	0.02	0.02	0.01	0.01	0.04	0.03	0.12	0.06	0.01	0.01	0.098	0.026	0.049	0.064	0.128	0.037	0.023
[Clostridium] saccharolyticum	0.06	0.07	0.06	0.11	0.06	0.01	0.05	0.06	0.06	0.04	0.07	0.07	0.04	0.13	0.05	0.15	0.06	0.13	0.11	0.07	0.06	0.05	0.05	0.05	0.06	0.08	0.03	0.11	0.05	0.04	0.06	0.06	0.1	0.06	0.09	0.04	0.04	0.07	0.15	0.15	0.04	0.07	0.101	0.082	0.102	0.093	0.141	0.087	0.082
Streptococcus sp. FDAARGOS_192	0.17	0.47	0.03	0	0	0	0	0.24	0.07	0.01	0	0.02	0.02	0.04	0.19	0.22	0.03	0	0.06	0.04	0.05	0.2	0.11	0.07	0.01	0.04	0	0.03	0.19	0.14	0.02	0	0.02	0	0.02	0.06	0.08	0.02	0.01	0.18	0	0.03	0.001	0.008	0.098	0.004	0.003	0.003	0.004
[Clostridium] sphenoides	0.06	0.06	0.06	0.14	0.04	0.02	0.05	0.07	0.06	0.04	0.08	0.07	0.04	0.14	0.05	0.07	0.06	0.14	0.06	0.08	0.05	0.05	0.04	0.05	0.08	0.05	0.04	0.1	0.06	0.04	0.06	0.07	0.06	0.06	0.09	0.05	0.04	0.07	0.17	0.13	0.05	0.08	0.06	0.091	0.096	0.085	0.093	0.075	0.093
Erysipelotrichaceae bacterium GAM147	0.02	0.07	0.06	0.04	0.08	0.02	0.1	0.02	0.07	0.02	0.03	0.06	0.04	0.54	0.02	0.2	0.03	0.04	0.08	0.06	0.11	0.02	0.04	0.03	0.02	0.12	0.02	0.28	0.01	0.04	0.01	0.01	0.05	0.02	0.09	0.01	0.03	0.02	0.02	0.1	0.02	0.17	0.032	0.031	0.025	0.018	0.136	0.03	0.025
Streptococcus parasanguinis	0.03	0.5	0.04	0	0	0	0.01	0.01	0.13	0.01	0	0.02	0.01	0.05	0.03	0.26	0.07	0	0.04	0.06	0.05	0.02	0.06	0.04	0	0.13	0	0.01	0.06	0.36	0.03	0	0.02	0.01	0.12	0.03	0.11	0.03	0.01	0.1	0.01	0.09	0.007	0.008	0.15	0.082	0.023	0.024	0.007
Anaerostipes rhamnosivorans	0.05	0.05	0.06	0.1	0.03	0.01	0.05	0.07	0.04	0.04	0.06	0.05	0.03	0.16	0.06	0.05	0.06	0.11	0.05	0.07	0.06	0.06	0.04	0.05	0.05	0.04	0.03	0.12	0.05	0.03	0.06	0.05	0.04	0.04	0.13	0.05	0.04	0.06	0.12	0.1	0.04	0.09	0.07	0.078	0.062	0.049	0.07	0.051	0.08
Christensenella minuta	0.06	0.03	0.05	0.07	0.01	0.05	0.01	0.13	0.03	0.04	0.05	0.01	0.07	0.04	0.22	0.04	0.04	0.12	0.02	0.21	0.01	0.08	0.02	0.07	0.04	0.01	0.08	0.04	0.07	0.01	0.06	0.04	0.02	0.12	0.02	0.08	0.03	0.08	0.09	0.03	0.16	0.02	0.07	0.077	0.204	0.169	0.021	0.048	0.075
Enterobacter hormaechei	0.01	0.01	0.03	0.01	0.01	0	0.01	0.02	0.01	0.05	0.02	0.05	0.02	0.04	0.01	0.17	0.03	0.02	0.03	0.01	0.01	0.02	1.61	0.03	0.01	0.01	0.01	0.01	0	0.02	0.01	0	0.01	0	0	0	0.04	0.01	0	0	0.07	0	0.009	0.003	0.004	0.007	0.009	0.003	0.003
Desulfovibrio fairfieldensis	0.37	0	0.01	0.01	0	0	0	0.15	0	0.01	0	0.01	0.01	0.01	0.64	0	0.01	0.01	0	0	0	0.41	0	0.01	0.02	0.01	0.01	0	0.34	0	0.01	0.05	0.01	0.02	0.01	0.14	0	0.01	0.02	0.01	0.03	0.01	0.018	0.017	0.005	0.012	0.007	0.007	0.023
Streptococcus equinus	0.14	0.42	0.02	0	0	0	0	0.21	0.07	0	0.01	0.01	0.02	0.02	0.15	0.21	0.02	0.01	0.04	0.04	0.02	0.16	0.1	0.05	0.01	0.03	0	0.02	0.13	0.1	0.01	0	0.01	0	0.01	0.04	0.06	0.01	0.01	0.11	0.01	0.02	0.001	0.006	0.079	0.003	0.002	0.004	0.003
Butyrivibrio fibrisolvens	0.04	0.04	0.08	0.09	0.03	0.01	0.03	0.05	0.04	0.05	0.07	0.04	0.03	0.1	0.05	0.05	0.07	0.14	0.05	0.07	0.03	0.05	0.04	0.05	0.05	0.06	0.03	0.05	0.05	0.03	0.08	0.04	0.04	0.05	0.05	0.04	0.04	0.06	0.11	0.09	0.04	0.05	0.059	0.089	0.057	0.028	0.063	0.059	0.087
Bacteroides coprosuis	0.01	0	0.13	0	0.09	0.06	0.04	0.01	0.12	0.15	0	0.11	0.04	0.01	0	0	0.12	0	0.03	0	0.04	0.02	0.13	0.06	0.01	0.08	0.03	0.01	0.04	0	0.16	0.01	0.09	0.03	0.03	0.03	0.38	0.11	0.01	0.02	0.01	0.01	0.024	0.161	0.017	0.064	0.071	0.009	0.148
Butyrivibrio proteoclasticus	0.04	0.03	0.07	0.11	0.03	0.01	0.02	0.06	0.04	0.04	0.07	0.04	0.03	0.09	0.05	0.04	0.07	0.12	0.05	0.08	0.03	0.06	0.04	0.05	0.05	0.05	0.02	0.05	0.05	0.02	0.07	0.04	0.04	0.05	0.05	0.05	0.05	0.06	0.12	0.09	0.04	0.04	0.064	0.085	0.047	0.023	0.059	0.06	0.081
Blautia coccoides	0.09	0.07	0	0.1	0.05	0	0.08	0.06	0.09	0	0.06	0.06	0.08	0.29	0.07	0.08	0.08	0.09	0.13	0.22	0.13	0.11	0.1	0	0.05	0.11	0	0	0	0	0	0	0	0	0	0	0	0	0	0	0	0	1e-05	1e-05	1e-05	1e-05	1e-05	1e-05	1e-05
Streptococcus thermophilus	0.16	0.27	0.01	0.01	0.01	0	0	0.12	0.19	0	0	0.02	0.01	0.02	0.06	0.14	0.01	0.01	0.03	0.02	0.02	0.07	0.06	0.03	0.01	0.04	0	0.03	0.09	0.11	0.01	0.01	0.02	0	0.01	0.09	0.05	0.01	0.01	0.39	0.01	0.03	0.005	0.014	0.1	0.007	0.012	0.008	0.013
Ruminococcus champanellensis	0.06	0.01	0.1	0.03	0.01	0.11	0.01	0.14	0.01	0.06	0.03	0.01	0.07	0.02	0.07	0.03	0.15	0.1	0.03	0.03	0.02	0.11	0.02	0.06	0.02	0.02	0.03	0.02	0.12	0.01	0.1	0.02	0.03	0.03	0.02	0.09	0.01	0.07	0.06	0.03	0.05	0.02	0.069	0.106	0.038	0.017	0.086	0.019	0.109
Streptococcus sp. HSISM1	0.02	0.44	0.03	0	0	0	0.01	0.01	0.12	0.01	0	0.01	0.01	0.04	0.02	0.21	0.06	0	0.03	0.05	0.04	0.02	0.05	0.03	0	0.05	0	0.01	0.05	0.32	0.03	0	0.01	0	0.11	0.03	0.09	0.03	0	0.03	0	0.07	0.002	0.004	0.132	0.038	0.02	0.013	0.003
Butyrivibrio hungatei	0.04	0.03	0.07	0.09	0.03	0.01	0.02	0.05	0.03	0.05	0.06	0.03	0.02	0.08	0.04	0.03	0.07	0.12	0.04	0.07	0.03	0.05	0.02	0.05	0.05	0.05	0.02	0.05	0.05	0.02	0.06	0.04	0.03	0.05	0.04	0.05	0.01	0.05	0.12	0.07	0.03	0.05	0.053	0.069	0.04	0.025	0.047	0.052	0.067
Lachnoclostridium phytofermentans	0.04	0.03	0.05	0.08	0.03	0.01	0.03	0.05	0.03	0.03	0.05	0.04	0.02	0.11	0.04	0.04	0.05	0.09	0.04	0.06	0.05	0.05	0.02	0.04	0.04	0.05	0.02	0.08	0.05	0.02	0.05	0.04	0.04	0.05	0.06	0.04	0.02	0.05	0.1	0.08	0.03	0.05	0.055	0.065	0.058	0.034	0.052	0.047	0.061
Salmonella enterica	0.02	0.02	0.07	0.01	0.02	0.02	0.02	0.07	0.06	0.19	0.07	0.15	0.07	0.17	0.04	0.11	0.04	0.04	0.03	0.05	0.04	0.03	0.06	0.03	0.02	0.03	0.01	0.04	0.01	0.02	0.03	0.01	0.04	0.01	0.01	0.01	0.07	0.03	0.02	0.01	0.03	0.02	0.017	0.028	0.013	0.01	0.018	0.01	0.027
Lachnoanaerobaculum umeaense	0.04	0.03	0.04	0.08	0.03	0.01	0.02	0.04	0.04	0.03	0.06	0.03	0.02	0.09	0.04	0.03	0.04	0.1	0.04	0.06	0.04	0.04	0.03	0.03	0.04	0.05	0.02	0.06	0.04	0.02	0.03	0.04	0.04	0.04	0.06	0.03	0.04	0.04	0.11	0.08	0.03	0.06	0.045	0.057	0.047	0.038	0.049	0.042	0.053
Oscillibacter valericigenes	0.03	0.01	0.04	0.02	0.02	0.03	0.02	0.07	0.03	0.09	0.02	0.02	0.03	0.03	0.06	0.04	0.07	0.05	0.03	0.03	0.03	0.11	0.04	0.08	0.01	0.02	0.04	0.02	0.14	0.01	0.06	0.02	0.05	0.04	0.04	0.09	0.01	0.14	0.06	0.02	0.04	0.03	0.146	0.153	0.047	0.04	0.036	0.046	0.273
Porphyromonas gingivalis	0.01	0	0.07	0	0.08	0.04	0.02	0.01	0.13	0.08	0	0.07	0.02	0	0.01	0	0.07	0	0.04	0	0.01	0.04	0.15	0.04	0.01	0.06	0.02	0	0.05	0	0.09	0.01	0.09	0.02	0.01	0.04	0.39	0.06	0	0.01	0.01	0.01	0.016	0.08	0.011	0.031	0.035	0.008	0.078
Citrobacter freundii	0.01	0	0.02	0.01	0.01	0	0.02	0.01	0.02	0.02	0.01	0.02	0.01	0.04	0.01	1.09	0.01	0.01	0.01	0.01	0.01	0.01	0.02	0.01	0	0.01	0	0.02	0	0.04	0.01	0	0.01	0	0.01	0	0.02	0.02	0	0	0.22	0.01	0.057	0.005	0.004	0.003	0.006	0.005	0.006
Gordonibacter pamelaeae	0.4	0.03	0.03	0.01	0.02	0.02	0	0.2	0.01	0.01	0	0.01	0.02	0.01	0.33	0.04	0.03	0.01	0.02	0.07	0.01	0.11	0.02	0.04	0	0.01	0.01	0	0.04	0.01	0.01	0	0.01	0.04	0.01	0.04	0	0.02	0	0.02	0.05	0.01	0.016	0.01	0.036	0.027	0.003	0.004	0.011
Eubacterium maltosivorans	0.08	0.01	0.06	0.05	0.02	0.03	0.02	0.07	0.01	0.05	0.04	0.03	0.04	0.05	0.07	0.03	0.05	0.07	0.05	0.09	0.03	0.07	0.01	0.05	0.03	0.04	0.04	0.03	0.05	0.01	0.03	0.03	0.03	0.05	0.03	0.06	0	0.04	0.06	0.04	0.05	0.03	0.035	0.013	0.033	0.012	0.045	0.026	0.019
Clostridium perfringens	0.04	0.04	0.11	0.04	0.01	0	0.02	0.03	0.01	0.02	0.02	0.01	0.01	0.05	0.02	0.13	0.02	0.02	0.22	0.01	0.02	0.03	0.01	0.02	0.01	0.02	0.01	0.11	0.04	0.17	0.03	0.01	0.01	0.02	0.03	0.02	0.03	0.03	0.03	0.19	0.02	0.04	0.02	0.039	0.066	0.014	0.03	0.024	0.029
Muribaculum sp. TLL-A4	0.01	0	0.14	0.02	0.04	0.06	0.05	0.01	0.04	0.16	0.02	0.04	0.03	0.01	0.01	0	0.12	0.02	0.02	0	0.04	0.03	0.06	0.07	0.03	0.03	0.03	0.01	0.04	0	0.15	0.04	0.05	0.02	0.02	0.03	0.12	0.1	0.02	0.01	0.01	0.02	0.017	0.187	0.005	0.094	0.052	0.007	0.187
Lactobacillus reuteri	0.01	0	0.01	0.01	0	0	0	0.01	0	0.01	0	0	0	0.01	0	0	0.01	0	0	0	0	0.01	0	0.01	0	0.01	0	0.01	0.03	1.55	0.01	0	0	0	0	0	0	0.01	0.01	0.01	0	0	0.005	0.013	0.006	0.004	0.005	0.004	0.012
Clostridium botulinum	0.06	0.03	0.05	0.05	0.02	0.01	0.03	0.06	0.03	0.04	0.03	0.02	0.02	0.06	0.03	0.03	0.04	0.05	0.03	0.03	0.04	0.06	0.03	0.03	0.02	0.03	0.02	0.11	0.06	0.02	0.04	0.02	0.03	0.04	0.04	0.03	0.06	0.04	0.05	0.08	0.03	0.03	0.043	0.083	0.101	0.025	0.039	0.041	0.063
Bifidobacterium animalis	0.41	0.01	0.01	0.04	0	0.01	0	0.1	0.02	0	0.03	0.01	0.01	0.01	0.02	0.01	0	0.03	0	0.02	0	0	0.01	0.01	0.01	0	0	0	0.01	0	0	0	0	0	0.01	0.8	0	0	0	0	0.01	0	0.005	0.004	0.003	0.001	0.002	0.004	0.005
Muribaculum sp. H5	0.01	0	0.09	0.01	0.06	0.05	0.04	0.01	0.07	0.11	0	0.07	0.03	0.01	0	0	0.09	0	0.02	0	0.03	0.02	0.1	0.05	0.01	0.05	0.03	0.01	0.03	0	0.11	0.01	0.06	0.03	0.02	0.02	0.2	0.07	0.01	0.01	0.01	0.01	0.027	0.128	0.009	0.106	0.038	0.008	0.134
Streptococcus sp. HSISS1	0.08	0.44	0.02	0	0	0	0	0.13	0.07	0	0	0.01	0.01	0.03	0.1	0.22	0.02	0	0.04	0.01	0.03	0.11	0.1	0.05	0	0.01	0	0	0.02	0.02	0	0	0	0	0	0	0.01	0	0	0.02	0	0	1e-05	0.001	0.01	1e-05	1e-05	1e-05	1e-05
Muribaculum intestinale	0.01	0	0.11	0.01	0.05	0.03	0.02	0.01	0.06	0.14	0	0.05	0.02	0	0.01	0	0.1	0	0.02	0	0.02	0.02	0.08	0.06	0.02	0.04	0.02	0	0.03	0	0.13	0.01	0.06	0.02	0.01	0.02	0.17	0.09	0.01	0.01	0.01	0.01	0.019	0.13	0.01	0.106	0.052	0.008	0.134
Turicibacter sp. H121	0.04	0.01	0.02	0.06	0.02	0	0.04	0.02	0.01	0.01	0.01	0.01	0.01	0.03	0.04	0.03	0.01	0.02	0.01	0.01	0.02	0.02	0.01	0.02	0.01	0.01	0.01	0.17	0.02	0.02	0.02	0.01	0.04	0.02	0.26	0.03	0.04	0.02	0.01	0.03	0.11	0.08	0.023	0.012	0.034	0.005	0.041	0.008	0.012
Tannerella forsythia	0.02	0	0.06	0	0.06	0.05	0.03	0.02	0.03	0.08	0	0.07	0.03	0.01	0.01	0	0.06	0.01	0.03	0	0.02	0.03	0.04	0.04	0.01	0.05	0.03	0.01	0.05	0	0.08	0.01	0.06	0.03	0.02	0.03	0.08	0.07	0.01	0.02	0.01	0.01	0.034	0.097	0.01	0.044	0.043	0.007	0.096
Streptococcus infantarius	0.01	0.02	0.01	0.01	0	0.01	0	0.01	0.01	0	0.01	0	0	0	0.01	0.01	0	0.01	0.01	0.23	0	0.02	0.01	0	0	0.56	0	0	0.07	0.01	0	0	0	0	0	0	0	0	0	0.01	0	0.22	0.002	0.002	0.294	0.001	0.003	0.001	0.001
Alistipes sp. 5CPYCFAH4	0	0	0	0	0	0.69	0	0	0	0	0	0	0.24	0	0.15	0	0	0	0	0	0	0.16	0	0	0	0	0	0	0	0	0	0	0	0	0	0	0	0	0	0	0	0	1e-05	1e-05	1e-05	1e-05	1e-05	1e-05	1e-05
Schaalia odontolytica	0.01	0.06	0.01	0.03	0.01	0	0.02	0.02	0.02	0	0.02	0.03	0.01	0.05	0.05	0.04	0.01	0.03	0.03	0.04	0.03	0.02	0.03	0.01	0.01	0.02	0.01	0.02	0.04	0.07	0	0.02	0.03	0.02	0.05	0.04	0.04	0.02	0.01	0.13	0.04	0.08	0.004	0.014	0.132	0.016	0.029	0.007	0.008
Herbinix luporum	0.02	0.02	0.04	0.06	0.02	0.01	0.02	0.03	0.01	0.02	0.03	0.02	0.02	0.06	0.02	0.02	0.04	0.05	0.03	0.05	0.03	0.04	0.01	0.03	0.03	0.03	0.01	0.04	0.03	0.01	0.03	0.02	0.02	0.03	0.03	0.03	0.01	0.03	0.06	0.05	0.02	0.03	0.034	0.039	0.029	0.015	0.027	0.026	0.034
Paeniclostridium sordellii	0.02	0.09	0.02	0.05	0.01	0	0.01	0.02	0.02	0.01	0.01	0.02	0.01	0.05	0.01	0.02	0.01	0.01	0.01	0.01	0.02	0.01	0	0.01	0.01	0.01	0	0.08	0.02	0.04	0.02	0.01	0.03	0.01	0.05	0.01	0.14	0.02	0.02	0.2	0.03	0.06	0.013	0.008	0.015	0.003	0.01	0.007	0.006
Proteiniphilum saccharofermentans	0.01	0	0.07	0	0.05	0.04	0.03	0.01	0.05	0.08	0	0.06	0.02	0	0	0	0.06	0.01	0.02	0	0.02	0.02	0.06	0.04	0.01	0.04	0.02	0	0.04	0	0.09	0.01	0.06	0.02	0.02	0.03	0.13	0.06	0	0.01	0.01	0.01	0.019	0.096	0.015	0.034	0.044	0.006	0.096
Sutterella megalosphaeroides	0	0	0.01	0.06	0.04	0	0.01	0	0.02	0.01	0.15	0.22	0.01	0	0	0	0.01	0.05	0.05	0	0	0	0.03	0.01	0.09	0.1	0.01	0	0	0.01	0.01	0.1	0.06	0	0.02	0	0.04	0.01	0.04	0.01	0.01	0	0.006	0.156	0.01	0.266	0.005	0.005	0.211
Olsenella sp. GAM18	0.02	0.01	0.02	0.01	0.01	0.04	0.01	0.03	0.01	0.01	0.02	0.01	0.06	0.01	0.04	0.02	0.01	0.02	0.02	0.17	0.01	0.02	0.01	0.01	0	0.01	0.06	0.01	0.03	0.01	0.02	0	0.01	0.17	0.02	0.03	0	0.02	0.01	0.02	0.13	0.01	0.015	0.116	0.008	0.016	0.009	0.009	0.105
Erysipelotrichaceae bacterium I46	0.05	0	0	0.07	0	0.04	0.14	0.08	0	0	0	0	0	0.2	0.04	0	0	0.03	0	0.26	0.11	0.05	0	0	0.06	0	0	0	0	0	0	0	0	0	0	0	0	0	0	0	0	0	1e-05	1e-05	1e-05	1e-05	1e-05	1e-05	1e-05
Alistipes sp. 5NYCFAH2	0	0	0	0	0	0.51	0	0	0	0	0	0	0.33	0	0	0	0	0	0	0	0	0.28	0	0	0	0	0	0	0	0	0	0	0	0	0	0	0	0	0	0	0	0	1e-05	1e-05	1e-05	1e-05	1e-05	1e-05	1e-05
Ruminococcus albus	0.03	0.01	0.04	0.03	0.01	0.04	0.01	0.04	0.01	0.03	0.03	0.01	0.02	0.02	0.03	0.02	0.05	0.09	0.03	0.03	0.01	0.03	0.01	0.03	0.02	0.02	0.01	0.01	0.03	0.01	0.04	0.02	0.02	0.02	0.01	0.03	0.01	0.03	0.06	0.03	0.02	0.01	0.048	0.047	0.025	0.009	0.046	0.012	0.044
Bacillus cereus	0.05	0.01	0.05	0.04	0.02	0.01	0.02	0.06	0.02	0.04	0.02	0.03	0.01	0.07	0.02	0.02	0.05	0.12	0.02	0.02	0.03	0.04	0.01	0.03	0.02	0.02	0.01	0.02	0.02	0	0.02	0.01	0.01	0.01	0.01	0.01	0.01	0.02	0.02	0.02	0.01	0.01	0.017	0.027	0.022	0.008	0.011	0.007	0.022
Petrimonas mucosa	0.01	0	0.06	0	0.04	0.03	0.03	0.01	0.05	0.07	0	0.04	0.02	0	0	0	0.05	0	0.02	0	0.02	0.02	0.07	0.03	0	0.03	0.02	0.01	0.03	0	0.07	0	0.04	0.02	0.02	0.02	0.14	0.05	0	0.01	0.01	0.01	0.013	0.136	0.035	0.023	0.025	0.006	0.134
Streptococcus mutans	0.01	0.03	0.08	0.01	0	0	0	0.01	0	0.01	0	0.01	0	0.01	0.01	0.01	0.11	0.01	0.01	0.01	0	0.01	0.01	0.13	0	0.01	0	0.01	0.01	0.02	0.08	0	0.01	0	0.01	0.01	0.01	0.37	0.01	0.01	0	0	0.007	0.01	0.011	0.003	0.01	0.004	0.008
Acidaminococcus fermentans	0.09	0.01	0.02	0.01	0.01	0	0.01	0.09	0.01	0.01	0.01	0.01	0.01	0.01	0.12	0.01	0.02	0.01	0.01	0.01	0.01	0.06	0.01	0.02	0	0.01	0.01	0.01	0.15	0	0.02	0	0.01	0.01	0.01	0.1	0	0.02	0.01	0.03	0.02	0.01	0.014	0.061	0.019	0.013	0.018	0.009	0.065
Anaerotignum propionicum	0.02	0.01	0.02	0.02	0.01	0.01	0.01	0.02	0.03	0.02	0.02	0.03	0.01	0.04	0.01	0.03	0.02	0.04	0.02	0.02	0.06	0.02	0.02	0.02	0.01	0.02	0.02	0.05	0.02	0.01	0.02	0.01	0.03	0.03	0.04	0.01	0.02	0.03	0.03	0.04	0.02	0.04	0.023	0.041	0.021	0.029	0.026	0.037	0.052
Streptococcus vestibularis	0.03	0.2	0.01	0	0	0	0	0.04	0.03	0	0	0.01	0.01	0.01	0.03	0.09	0.02	0	0.02	0.01	0.01	0.03	0.04	0.03	0	0.01	0	0.02	0.04	0.08	0.01	0	0.01	0	0.01	0.02	0.04	0.02	0	0.07	0	0.02	0.001	0.004	0.146	0.005	0.004	0.003	0.002
Christensenella massiliensis	0.04	0.01	0.02	0.02	0.01	0.01	0.02	0.04	0.01	0.02	0.01	0.02	0.01	0.04	0.04	0.02	0.02	0.04	0.03	0.02	0.03	0.03	0.01	0.03	0.01	0.02	0.01	0.04	0.04	0.01	0.02	0.01	0.02	0.01	0.03	0.04	0	0.03	0.03	0.03	0.02	0.02	0.034	0.031	0.024	0.012	0.017	0.018	0.036
Streptococcus pyogenes	0.01	0.04	0.04	0.02	0.01	0	0.04	0.02	0.02	0.02	0.01	0.01	0.01	0.16	0.02	0.03	0.05	0.02	0.02	0.01	0.12	0.02	0.02	0.04	0.01	0.01	0	0.03	0.01	0.01	0.01	0.01	0	0	0.01	0.01	0.01	0.01	0.01	0.01	0	0.01	0.009	0.012	0.009	0.006	0.013	0.005	0.01
Klebsiella quasipneumoniae	0	0	0.02	0.03	0	0	0.05	0	0	0.01	0	0	0	0.13	0	0.11	0	0.03	0.18	0.01	0.02	0.01	0.01	0	0	0.03	0	0.03	0	0.08	0	0	0	0	0	0	0	0	0	0	0.04	0.13	0.015	0.002	0.004	0.001	0.016	0.017	0.001
Clostridium butyricum	0.03	0.02	0.03	0.03	0.01	0.01	0.02	0.03	0.01	0.01	0.02	0.02	0.01	0.03	0.02	0.02	0.02	0.04	0.01	0.02	0.02	0.03	0.01	0.01	0.02	0.02	0.01	0.06	0.04	0.01	0.02	0.02	0.02	0.02	0.02	0.02	0.01	0.02	0.04	0.05	0.01	0.02	0.021	0.035	0.068	0.012	0.025	0.02	0.028
Streptococcus agalactiae	0.03	0.03	0.02	0.01	0.01	0	0.04	0.03	0.01	0.01	0	0.02	0.01	0.13	0.04	0.06	0.02	0.01	0.02	0.01	0.08	0.05	0.02	0.02	0	0.02	0	0.04	0.01	0.01	0.01	0	0.01	0	0.02	0.02	0	0.01	0	0.05	0	0.02	0.048	0.023	0.029	0.003	0.01	0.077	0.017
Acinetobacter baumannii	0.01	0	0.02	0.01	0.01	0	0	0.01	0.03	0.02	0.01	0.01	0	0.02	0.01	0.01	0.02	0.09	0.01	0.01	0.01	0.02	0.18	0.02	0.01	0.04	0.06	0.22	0	0	0	0	0.01	0	0	0	0.01	0	0	0	0	0	0.004	0.011	0.001	0.003	0.002	0.002	0.008
Christensenella sp. Marseille-P3954	0.03	0.01	0.02	0.02	0.01	0.01	0.01	0.04	0.01	0.02	0.01	0.01	0.01	0.04	0.03	0.02	0.02	0.02	0.03	0.02	0.02	0.03	0.01	0.03	0.01	0.02	0.01	0.03	0.04	0.01	0.03	0.01	0.02	0.02	0.02	0.03	0	0.05	0.02	0.02	0.02	0.02	0.05	0.029	0.021	0.013	0.017	0.014	0.038
Streptococcus gordonii	0.02	0.09	0.01	0.01	0	0	0	0.03	0.05	0.01	0	0.01	0	0.02	0.02	0.13	0.01	0.01	0.01	0.01	0.01	0.01	0.06	0.01	0	0.01	0	0.01	0.02	0.07	0.01	0.01	0.01	0	0.02	0.01	0.09	0.02	0.01	0.02	0	0.02	0.003	0.013	0.025	0.013	0.004	0.004	0.012
Paenibacillus polymyxa	0.04	0.01	0.05	0.05	0.01	0.01	0.01	0.04	0.03	0.04	0.02	0.02	0.02	0.05	0.03	0.02	0.04	0.04	0.02	0.04	0.02	0.03	0.03	0.03	0.02	0.02	0	0.01	0.01	0	0.01	0	0	0	0	0.01	0.03	0.01	0.01	0.01	0	0.01	0.011	0.02	0.008	0.005	0.008	0.006	0.018
Ruminococcaceae bacterium CPB6	0.02	0.01	0.02	0.02	0.01	0.01	0.01	0.03	0.01	0.01	0.02	0.01	0.02	0.03	0.02	0.02	0.02	0.07	0.03	0.03	0.01	0.02	0.01	0.02	0.01	0.02	0.01	0.02	0.03	0.01	0.02	0.01	0.02	0.02	0.02	0.03	0	0.03	0.04	0.02	0.03	0.02	0.031	0.032	0.017	0.009	0.03	0.009	0.034
Caproiciproducens sp. NJN-50	0.02	0.01	0.02	0.01	0.01	0.01	0.01	0.03	0.01	0.02	0.02	0.01	0.01	0.03	0.02	0.02	0.02	0.07	0.02	0.02	0.02	0.02	0.01	0.03	0.01	0.01	0.01	0.02	0.03	0.01	0.02	0.02	0.02	0.02	0.03	0.02	0	0.04	0.04	0.02	0.02	0.02	0.033	0.031	0.018	0.013	0.024	0.013	0.04
Paludibacter propionicigenes	0.01	0	0.04	0	0.04	0.03	0.03	0.01	0.02	0.05	0	0.05	0.02	0	0	0	0.04	0	0.02	0	0.02	0.01	0.03	0.03	0	0.04	0.01	0	0.02	0	0.06	0	0.05	0.01	0.02	0.02	0.07	0.04	0	0.01	0	0.01	0.015	0.053	0.008	0.024	0.038	0.004	0.055
Weissella cibaria	0	0	0.01	0	0	0	0	0.01	0.01	0	0	0.01	0.05	0	0.04	0.01	0.01	0	0	0.07	0	0.08	0.01	0	0	0	0.03	0	0.2	0	0	0	0	0	0.15	0.04	0.03	0	0	0	0.04	0	0.003	0.006	0.026	0.001	0.001	0.001	0.005
Ethanoligenens harbinense	0.02	0.01	0.02	0.01	0.01	0.01	0.01	0.03	0.01	0.02	0.02	0.01	0.01	0.02	0.02	0.02	0.02	0.04	0.02	0.02	0.02	0.03	0.02	0.02	0.01	0.01	0.01	0.02	0.03	0.01	0.02	0.01	0.02	0.02	0.02	0.03	0.01	0.03	0.03	0.02	0.02	0.01	0.039	0.034	0.018	0.012	0.023	0.012	0.046
Tannerella sp. oral taxon HOT-286	0.01	0	0.05	0	0.03	0.02	0.01	0.01	0.04	0.06	0	0.02	0.01	0	0	0	0.04	0	0.01	0	0	0.01	0.05	0.03	0.01	0.02	0.02	0	0.02	0	0.06	0.01	0.04	0.02	0	0.02	0.09	0.04	0	0	0.01	0	0.016	0.074	0.002	0.022	0.015	0.009	0.076
Streptococcus mitis	0.01	0.07	0.01	0.02	0	0	0	0.01	0.02	0.01	0.02	0.01	0	0.02	0.01	0.12	0.01	0.04	0.01	0.01	0.02	0.01	0.02	0.01	0.01	0.01	0	0.02	0.01	0.03	0.01	0.01	0.01	0	0.01	0.01	0.07	0.01	0.02	0.02	0	0.04	0.005	0.008	0.026	0.03	0.006	0.006	0.007
Gordonibacter urolithinfaciens	0.05	0.04	0.02	0	0.01	0	0.01	0.03	0.03	0.01	0	0.01	0.01	0.05	0.06	0.03	0.02	0.01	0.01	0.03	0.01	0.02	0.02	0.03	0	0.01	0.01	0.01	0.01	0.01	0.01	0	0.01	0.02	0.04	0.01	0	0.02	0	0.01	0.02	0.04	0.008	0.009	0.009	0.007	0.007	0.004	0.009
Streptococcus suis	0.02	0.02	0.02	0.02	0.02	0	0.01	0.02	0.01	0.01	0.02	0.02	0.01	0.02	0.02	0.02	0.02	0.03	0.05	0.02	0.01	0.03	0.01	0.03	0.01	0.02	0.01	0.02	0.02	0.01	0.02	0.01	0.02	0.01	0.01	0.01	0.01	0.02	0.03	0.03	0.01	0.01	0.015	0.021	0.023	0.009	0.013	0.011	0.019
Lactococcus lactis	0.02	0.01	0.01	0.01	0.01	0	0.01	0.03	0.01	0.01	0.01	0.01	0.01	0.02	0.02	0.06	0.02	0.01	0.09	0.01	0.01	0.02	0.02	0.01	0.01	0.02	0.01	0.02	0.02	0.02	0.01	0	0.01	0.01	0.01	0.04	0.02	0.01	0.01	0.02	0.03	0.03	0.018	0.019	0.022	0.011	0.016	0.007	0.017
Clostridium pasteurianum	0.03	0.01	0.03	0.02	0.01	0.01	0.01	0.02	0.02	0.02	0.01	0.01	0.01	0.02	0.01	0.01	0.02	0.02	0.01	0.02	0.02	0.02	0.01	0.02	0.01	0.02	0.01	0.03	0.03	0.01	0.03	0.01	0.02	0.02	0.01	0.01	0.04	0.02	0.02	0.03	0.01	0.01	0.017	0.034	0.03	0.014	0.017	0.016	0.027
Lactobacillus ruminis	0.02	0.01	0.01	0.02	0.04	0	0	0.02	0.01	0.01	0.01	0.02	0.02	0.02	0.01	0.01	0.02	0.02	0.04	0.05	0	0.02	0.01	0.01	0.01	0.02	0.01	0.01	0.02	0.01	0.02	0.01	0.03	0.02	0.01	0.02	0.02	0.01	0.01	0.07	0.02	0.01	0.013	0.029	0.017	0.012	0.029	0.011	0.032
Sutterella sp. KGMB03119	0	0	0.01	0.03	0.02	0	0.01	0	0.02	0.02	0.07	0.1	0.01	0	0	0	0.01	0.02	0.03	0	0	0	0.03	0.01	0.05	0.05	0	0	0.01	0.01	0.02	0.05	0.03	0	0.01	0	0.04	0.01	0.02	0.01	0.02	0	0.006	0.086	0.01	0.131	0.004	0.006	0.114
Streptococcus sp. A12	0	0.13	0	0.01	0	0	0	0	0.04	0	0.01	0.01	0	0.01	0	0.26	0.01	0.01	0.02	0.01	0	0	0.01	0	0	0.04	0	0	0.01	0.04	0	0	0.01	0	0.01	0	0.05	0	0	0.01	0	0.01	0.002	0.004	0.017	0.003	0.003	0.002	0.003
Streptococcus oralis	0.01	0.08	0.01	0.01	0	0	0	0.01	0.02	0.01	0.02	0.01	0	0.02	0.01	0.14	0.02	0.01	0.01	0.01	0.02	0.01	0.02	0.01	0.01	0.01	0	0.02	0.01	0.03	0.01	0.01	0.01	0	0.02	0.01	0.03	0.01	0.01	0.02	0	0.03	0.004	0.006	0.024	0.013	0.004	0.004	0.004
Enterobacter roggenkampii	0	0	0.04	0	0	0	0	0	0	0.01	0	0.01	0.01	0.01	0	0.11	0	0	0.04	0	0	0	0.04	0	0	0	0	0.02	0	0.12	0	0	0	0	0.01	0.01	0.02	0	0	0	0.1	0.14	0.004	1e-05	0.022	0.01	0.072	0.018	1e-05
Streptococcus sanguinis	0.02	0.03	0.02	0.02	0	0	0	0.03	0.02	0.01	0.01	0.01	0	0.01	0.02	0.04	0.02	0.02	0.01	0.02	0.01	0.01	0.02	0.01	0.01	0.01	0	0.01	0.02	0.02	0.01	0.03	0.01	0	0.02	0.02	0.04	0.01	0.02	0.04	0.01	0.04	0.007	0.012	0.037	0.014	0.011	0.008	0.01
Erysipelotrichaceae bacterium SG0102	0.02	0.01	0.02	0.03	0.01	0	0.01	0.02	0.01	0.01	0.02	0.02	0.01	0.02	0.01	0.01	0.02	0.03	0.02	0.03	0.01	0.01	0.01	0.02	0.01	0.01	0.01	0.02	0.02	0.01	0.03	0.01	0.02	0.01	0.01	0.01	0.01	0.03	0.03	0.04	0.01	0.01	0.02	0.071	0.024	0.009	0.017	0.014	0.067
Streptococcus sp. HSISS2	0.02	0.18	0.01	0	0	0	0	0.03	0.03	0	0	0	0	0.01	0.03	0.08	0.01	0	0.01	0.01	0.01	0.02	0.04	0.01	0	0.01	0	0.01	0.03	0.05	0	0	0	0	0	0.01	0.03	0	0	0.04	0	0	1e-05	0.002	0.031	0.001	0.001	0.001	0.001
Chitinophaga pinensis	0.01	0	0.05	0	0.02	0.02	0.02	0.01	0.02	0.06	0	0.02	0.01	0	0	0	0.04	0	0.01	0	0.01	0.01	0.04	0.02	0	0.02	0.01	0	0.02	0	0.06	0	0.03	0.01	0.01	0.01	0.07	0.04	0.01	0.01	0.01	0	0.012	0.048	0.005	0.013	0.021	0.006	0.05
Eubacterium callanderi	0.02	0.01	0.01	0.01	0.01	0.01	0.01	0.02	0.01	0.01	0.01	0.01	0.01	0.05	0.02	0.01	0.01	0.02	0.01	0.02	0.02	0.02	0.01	0.01	0.01	0.01	0.01	0.02	0.02	0	0.01	0.01	0.01	0.01	0.04	0.02	0	0.02	0.03	0.03	0.02	0.04	0.014	0.016	0.011	0.009	0.013	0.01	0.019
Streptococcus sp. HSISS3	0.04	0.1	0.01	0	0	0	0	0.06	0.02	0	0	0	0	0.01	0.04	0.05	0.01	0	0.01	0.01	0.01	0.04	0.02	0.02	0	0.01	0	0.01	0.05	0.04	0.01	0	0	0	0	0.01	0.02	0	0	0.05	0	0	0.001	0.002	0.022	0.001	0.001	0.001	0.001
Bacillus thuringiensis	0.04	0.01	0.03	0.02	0.01	0.01	0.01	0.04	0.02	0.02	0.01	0.03	0.01	0.06	0.03	0.02	0.02	0.03	0.01	0.02	0.02	0.03	0.02	0.02	0.01	0.01	0	0.01	0.01	0	0.01	0	0	0.01	0	0.01	0.01	0.01	0	0.01	0	0.01	0.008	0.022	0.01	0.008	0.01	0.006	0.017
Olsenella sp. Marseille-P2300	0.03	0.01	0.02	0.01	0	0	0.01	0.04	0.01	0.02	0.01	0.01	0.01	0	0.06	0.01	0.02	0.01	0.01	0.03	0.01	0.03	0.01	0.02	0	0.01	0.01	0.01	0.04	0	0.02	0	0.01	0.02	0.01	0.04	0.01	0.02	0.01	0.02	0.02	0.01	0.016	0.018	0.009	0.011	0.008	0.007	0.024
Ornithobacterium rhinotracheale	0	0	0.08	0.01	0.02	0.01	0.01	0	0.02	0.09	0	0.02	0	0	0	0	0.06	0.01	0.01	0	0.01	0.01	0.03	0.03	0.01	0.01	0	0	0.01	0	0.07	0	0.01	0	0.01	0.01	0.06	0.04	0	0	0	0	0.008	0.044	0.003	0.011	0.005	0.002	0.038
Campylobacter coli	0.01	0.02	0.01	0.05	0.01	0.01	0.01	0.02	0.01	0	0.03	0.01	0.01	0.01	0.01	0.03	0.01	0.05	0.02	0.03	0.01	0.02	0.01	0.01	0.02	0.01	0.01	0.01	0.02	0	0.01	0.01	0.01	0.01	0.01	0.01	0	0.01	0.04	0.02	0.01	0.01	0.015	0.02	0.018	0.003	0.008	0.015	0.022
Bifidobacterium angulatum	0.02	0.06	0.01	0	0	0.02	0	0.03	0.04	0.01	0.01	0	0.01	0	0.08	0.01	0.01	0.01	0	0.05	0	0.02	0.03	0.01	0	0	0.02	0	0.03	0.01	0.01	0	0	0.02	0	0.02	0.01	0.01	0	0.03	0.03	0	0.004	0.016	0.015	0.003	0.022	0.003	0.012
Bifidobacterium gallinarum	0.01	0.17	0	0	0	0	0	0.01	0.12	0	0.01	0	0	0	0.03	0.03	0	0.01	0	0.01	0	0.01	0.09	0	0	0	0	0	0.01	0.01	0	0	0	0.01	0	0.01	0.04	0	0.01	0.02	0.01	0	0.006	0.005	0.005	0.002	0.006	0.003	0.005
Fusobacterium nucleatum	0.03	0.01	0.02	0.02	0.01	0	0.01	0.02	0.02	0.01	0.01	0.01	0.01	0.02	0.01	0.02	0.02	0.01	0.01	0.01	0.02	0.02	0	0.01	0.01	0.01	0.01	0.03	0.02	0.01	0.01	0.01	0	0.01	0.01	0.01	0.08	0.01	0.01	0.02	0.01	0.01	0.015	0.021	0.021	0.009	0.007	0.011	0.016
Selenomonas ruminantium	0.02	0.01	0.02	0.02	0.01	0	0.01	0.02	0.01	0.02	0.01	0.01	0.01	0.02	0.01	0.01	0.02	0.02	0.01	0.02	0.01	0.02	0.02	0.01	0.01	0.01	0.01	0.01	0.02	0	0.02	0.01	0.01	0.01	0.02	0.02	0.02	0.02	0.02	0.03	0.01	0.01	0.018	0.078	0.017	0.012	0.014	0.01	0.136
Clostridium beijerinckii	0.02	0.01	0.02	0.02	0.01	0.01	0.01	0.02	0.01	0.02	0.01	0.01	0.01	0.02	0.01	0.01	0.02	0.02	0.01	0.01	0.01	0.02	0.01	0.01	0.01	0.01	0.01	0.03	0.02	0	0.02	0.01	0.01	0.01	0.01	0.01	0.03	0.02	0.02	0.02	0.01	0.01	0.013	0.031	0.033	0.007	0.011	0.015	0.021
Clostridium saccharoperbutylacetonicum	0.02	0.01	0.02	0.02	0.01	0.01	0.01	0.02	0.01	0.01	0.01	0.01	0.01	0.02	0.01	0.01	0.01	0.02	0.01	0.01	0.02	0.01	0.01	0.01	0.01	0.01	0.01	0.04	0.02	0.01	0.02	0.01	0.01	0.01	0.01	0.01	0.02	0.02	0.02	0.02	0.01	0.01	0.011	0.029	0.035	0.008	0.02	0.014	0.024
Klebsiella aerogenes	0.01	0	0.01	0.01	0	0	0.02	0.01	0	0.01	0	0	0	0	0	0.24	0.01	0.01	0.03	0	0	0.01	0.01	0	0	0	0	0.12	0.01	0.02	0.01	0	0	0	0	0	0.01	0	0.01	0	0.01	0.01	0.084	0.007	0.005	0.001	0.006	0.008	0.006
Agrobacterium tumefaciens	0.01	0.01	0.03	0.01	0.01	0.01	0.01	0.01	0.02	0.03	0.01	0.02	0.01	0.01	0.01	0.01	0.03	0.02	0.01	0.01	0.01	0.01	0.02	0.02	0.01	0.01	0.01	0.01	0.01	0	0.02	0.01	0.01	0.01	0.01	0.01	0.02	0.02	0.02	0.01	0.01	0.01	0.012	0.028	0.007	0.007	0.013	0.008	0.032
Staphylococcus aureus	0.03	0.01	0.02	0.02	0.01	0.01	0.01	0.02	0.02	0.01	0.01	0.01	0.01	0.03	0.01	0.01	0.01	0.02	0.02	0.01	0.02	0.02	0.02	0.02	0.01	0.02	0	0.01	0.01	0.01	0.01	0.01	0.01	0	0.02	0.01	0.01	0.02	0.01	0.01	0	0	0.005	0.009	0.011	0.004	0.003	0.005	0.008
Streptococcus australis	0.01	0.08	0	0.01	0	0	0	0.01	0.02	0	0.01	0.01	0	0.01	0.01	0.14	0.01	0.01	0.01	0.01	0.01	0.01	0.01	0	0	0.03	0	0.01	0.01	0.03	0	0	0.01	0	0.01	0.01	0.03	0	0	0.02	0	0.01	0.004	0.006	0.02	0.006	0.003	0.003	0.005
Pseudomonas aeruginosa	0.02	0.01	0.02	0.01	0.02	0.01	0.03	0.02	0.05	0.02	0.01	0.02	0.02	0.01	0.02	0.02	0.01	0.02	0.02	0.01	0.01	0.02	0.04	0.03	0.01	0.02	0	0.01	0	0	0	0	0.01	0	0.01	0	0	0.01	0	0	0.01	0	0.005	0.011	0.005	0.004	0.006	0.004	0.013
Haemophilus influenzae	0.01	0.01	0.01	0	0	0	0.01	0.01	0.02	0.01	0	0.01	0	0.01	0	0.06	0.01	0.01	0.02	0	0.03	0.01	0.02	0.01	0	0.1	0	0.04	0.01	0.02	0.02	0	0.01	0	0.01	0	0.02	0	0.01	0.02	0	0.02	0.004	0.011	0.011	0.001	0.003	0.012	0.009
Bacillus subtilis	0.02	0.01	0.03	0.02	0.01	0.01	0.02	0.02	0.01	0.01	0.01	0.02	0.01	0.04	0.02	0.02	0.03	0.02	0.02	0.03	0.02	0.02	0.02	0.02	0.01	0.01	0	0.01	0.01	0	0	0	0	0	0.01	0	0	0	0.01	0.01	0	0.01	0.006	0.009	0.007	0.006	0.006	0.004	0.009
Lachnospiraceae bacterium oral taxon 500	0.01	0.01	0.01	0.03	0.01	0	0.01	0.02	0.01	0.01	0.02	0.01	0.01	0.03	0.01	0.01	0.01	0.02	0.01	0.02	0.01	0.02	0	0.01	0.01	0.01	0.01	0.02	0.02	0	0.01	0.01	0.01	0.01	0.01	0.01	0	0.02	0.03	0.02	0.01	0.02	0.02	0.022	0.016	0.01	0.013	0.018	0.02
Fermentimonas caenicola	0.01	0	0.02	0	0.03	0.02	0.02	0	0.02	0.03	0	0.04	0.01	0	0	0	0.02	0	0.01	0	0.01	0.01	0.03	0.02	0	0.03	0.01	0	0.01	0	0.03	0	0.03	0.01	0.01	0.01	0.06	0.03	0	0.01	0	0	0.008	0.034	0.005	0.016	0.016	0.002	0.035
Morganella morganii	0.01	0	0.01	0.01	0.01	0.01	0.07	0.01	0.01	0.01	0	0.01	0.01	0.01	0	0	0.01	0.01	0.01	0	0.01	0.01	0.01	0.01	0.01	0.01	0	0.16	0.01	0	0.01	0	0.01	0.01	0.01	0.01	0.02	0.01	0.01	0.01	0	0	0.009	0.015	0.005	0.005	0.011	0.005	0.015
Klebsiella variicola	0	0	0.04	0	0	0	0	0	0	0	0	0	0	0.01	0	0.28	0	0	0.05	0	0	0	0.02	0	0	0.03	0	0.02	0	0.03	0	0	0	0	0	0	0.03	0	0	0	0.01	0.02	0.017	0.001	0.007	1e-05	0.014	0.015	1e-05
Shigella flexneri	0	0.01	0.06	0	0	0	0.04	0	0.01	0.08	0	0	0.01	0.17	0.01	0.02	0.01	0	0.02	0.01	0.01	0	0.01	0	0.01	0.03	0	0.01	0	0	0	0	0.02	0	0	0	0	0	0	0	0	0	0.002	1e-05	0.001	1e-05	0.001	1e-05	1e-05
Desulfovibrio vulgaris	0	0	0.01	0.02	0.01	0	0.01	0.01	0	0	0.01	0.02	0.02	0.01	0.01	0.01	0.01	0.01	0.01	0.01	0.01	0.01	0	0.01	0.03	0.01	0.02	0.01	0.02	0	0.01	0.03	0.02	0.04	0.02	0.02	0	0.01	0.02	0.01	0.05	0.01	0.024	0.029	0.007	0.026	0.01	0.007	0.041
Lactobacillus salivarius	0.01	0.01	0.05	0.01	0	0	0	0.01	0	0.01	0.01	0	0	0.01	0.01	0.01	0.07	0.01	0	0.01	0.01	0.01	0	0.06	0	0	0	0.01	0.01	0	0.05	0.01	0	0.01	0	0.01	0.01	0.09	0.01	0.01	0.01	0	0.008	0.013	0.011	0.005	0.007	0.007	0.011
Pseudomonas fluorescens	0.01	0	0.03	0.01	0.01	0.01	0.01	0.01	0.02	0.03	0.01	0.01	0.01	0.01	0.01	0.01	0.03	0.02	0.01	0.01	0.01	0.01	0.02	0.02	0.01	0.01	0.01	0.01	0.01	0	0.02	0	0.01	0.01	0.01	0.01	0.03	0.02	0.01	0.01	0.01	0.01	0.012	0.036	0.006	0.009	0.015	0.006	0.037
Pseudomonas syringae	0.01	0	0.03	0.01	0.01	0	0.01	0.01	0.04	0.03	0.01	0.01	0.01	0.01	0.01	0.01	0.03	0.02	0.01	0.01	0.01	0.01	0.05	0.02	0.01	0.01	0	0	0.01	0	0.01	0	0.01	0.01	0.01	0.01	0.04	0.01	0.01	0.01	0.01	0	0.005	0.017	0.005	0.004	0.006	0.004	0.02
Libanicoccus massiliensis	0.02	0.01	0.02	0.01	0	0	0.01	0.02	0.01	0.02	0.01	0.01	0.01	0	0.03	0.01	0.02	0.01	0.01	0.03	0.01	0.02	0.01	0.01	0	0.01	0.01	0	0.02	0	0.02	0	0.01	0.01	0.01	0.02	0.02	0.02	0.01	0.02	0.03	0	0.009	0.024	0.005	0.009	0.005	0.004	0.026
Pseudomonas putida	0.01	0.01	0.04	0.01	0.01	0.01	0.01	0.01	0.01	0.04	0.01	0.01	0.01	0.01	0.01	0.01	0.03	0.01	0.01	0.01	0.02	0.01	0.01	0.02	0.01	0.01	0.01	0.01	0.01	0	0.02	0.01	0.01	0.01	0.01	0.01	0	0.02	0.01	0.01	0.01	0.01	0.014	0.05	0.009	0.007	0.012	0.006	0.05
Stenotrophomonas maltophilia	0.01	0.01	0.03	0.01	0.01	0.01	0.01	0.01	0.02	0.03	0.01	0.01	0.01	0.01	0.01	0.01	0.03	0.01	0.01	0.01	0.01	0.01	0.03	0.02	0.01	0.01	0	0	0.01	0	0.03	0.01	0.01	0.01	0.01	0.01	0.03	0.02	0.01	0	0.01	0	0.008	0.028	0.006	0.007	0.007	0.003	0.032
Desulfovibrio desulfuricans	0.01	0	0.01	0.01	0.01	0.01	0.01	0.01	0.01	0.01	0.01	0.02	0.02	0.01	0.01	0.01	0.02	0.01	0.01	0.01	0.01	0.01	0.01	0.02	0.02	0.01	0.01	0.01	0.01	0	0.01	0.01	0.01	0.02	0.01	0.01	0.02	0.01	0.01	0.01	0.06	0.01	0.014	0.02	0.006	0.012	0.007	0.005	0.027
Haemophilus haemolyticus	0	0.01	0.01	0	0	0	0.01	0	0.02	0	0	0.01	0	0.01	0	0.07	0.01	0	0.02	0	0.04	0	0.01	0	0	0.11	0	0.05	0.01	0.02	0.01	0	0.01	0	0.02	0	0.01	0	0	0.03	0	0.03	0.002	0.001	0.011	0.001	0.004	0.01	0.001
Bacteroidales bacterium CF	0	0	0.05	0	0.01	0.01	0.01	0	0.03	0.06	0	0.01	0	0	0	0	0.04	0.01	0.01	0	0	0.01	0.05	0.02	0	0.01	0	0	0.01	0	0.05	0	0.01	0	0	0.01	0.08	0.03	0	0	0	0	0.005	0.029	0.003	0.006	0.006	0.002	0.029
Oxalobacter formigenes	0	0	0.08	0.01	0.01	0	0	0.01	0	0.03	0	0	0.02	0	0	0	0.09	0	0	0	0	0	0	0.03	0	0	0	0	0.01	0	0.01	0.01	0.01	0.02	0	0	0	0.1	0.01	0	0.07	0	0.014	0.013	0.004	0.023	0.003	0.001	0.013
Clostridium baratii	0.02	0.02	0.02	0.02	0.01	0	0.01	0.01	0	0.01	0.01	0.01	0.01	0.01	0.01	0.02	0.01	0.01	0	0.01	0.01	0.01	0	0.01	0.01	0.01	0.01	0.05	0.02	0.02	0.01	0.01	0.01	0.01	0.01	0.01	0.01	0.01	0.01	0.03	0.01	0.01	0.009	0.015	0.043	0.007	0.018	0.008	0.012
Acidaminococcus intestini	0.04	0	0.01	0.01	0	0	0.01	0.05	0	0.01	0.01	0.01	0	0.01	0.05	0	0.02	0.01	0	0.01	0.01	0.03	0	0.01	0	0.01	0	0.01	0.06	0	0.01	0	0.01	0.01	0.01	0.04	0	0.01	0.01	0.01	0.01	0.01	0.006	0.024	0.015	0.009	0.014	0.005	0.025
Streptococcus pneumoniae	0.01	0.04	0.01	0.01	0	0	0	0.01	0.01	0.01	0.01	0.01	0	0.02	0.01	0.07	0.01	0.03	0.01	0.01	0.01	0.01	0.01	0.01	0.01	0.01	0	0.01	0.01	0.02	0.01	0.01	0.01	0	0.01	0.01	0.02	0.01	0.01	0.01	0	0.02	0.006	0.013	0.012	0.01	0.007	0.006	0.01
Sorangium cellulosum	0.01	0	0.02	0.01	0.01	0	0	0.01	0.02	0.02	0.01	0.01	0.01	0	0.01	0.01	0.02	0.01	0.01	0.01	0.01	0.01	0.03	0.02	0.01	0.01	0.01	0	0.02	0	0.02	0.01	0.01	0.01	0.01	0.01	0.05	0.02	0.01	0.01	0.02	0	0.017	0.027	0.007	0.012	0.008	0.006	0.036
Aminipila sp. JN-39	0.01	0.01	0.02	0.01	0.01	0	0.01	0.01	0.01	0.01	0.01	0.01	0.01	0.02	0.01	0.01	0.02	0.02	0.01	0.01	0.01	0.01	0.01	0.01	0.01	0.01	0.01	0.01	0.01	0	0.02	0.01	0.01	0.01	0.01	0.01	0.02	0.02	0.02	0.02	0.01	0.01	0.016	0.027	0.016	0.013	0.011	0.009	0.028
Rothia mucilaginosa	0.01	0.03	0.01	0	0	0	0.01	0.01	0.03	0	0	0.02	0	0.03	0.01	0.05	0.01	0.01	0.01	0	0.02	0	0.02	0.01	0	0.01	0	0.01	0.01	0.03	0.01	0	0.01	0	0.03	0.01	0.02	0.01	0	0.02	0	0.03	0.004	0.027	0.104	0.01	0.031	0.016	0.016
Porphyromonas cangingivalis	0	0	0.04	0	0.02	0.01	0.01	0	0.02	0.04	0	0.01	0.01	0	0	0	0.03	0	0.01	0	0.01	0.01	0.03	0.02	0	0.01	0.01	0	0.01	0	0.04	0	0.02	0.01	0.01	0.01	0.07	0.03	0	0	0	0	0.006	0.035	0.003	0.012	0.011	0.002	0.036
Pseudoclostridium thermosuccinogenes	0.01	0	0.02	0.01	0.01	0	0.01	0.01	0.01	0.01	0.01	0.01	0.01	0.02	0.01	0.01	0.02	0.03	0.01	0.01	0.01	0.01	0.01	0.01	0.01	0.01	0	0.02	0.01	0	0.02	0.01	0.01	0.01	0.01	0.01	0.02	0.02	0.02	0.01	0.01	0.01	0.015	0.02	0.01	0.006	0.01	0.006	0.02
Olsenella umbonata	0.01	0.01	0.01	0.01	0	0.01	0	0.03	0.01	0.01	0	0.01	0.01	0.01	0.04	0.01	0.01	0.01	0.01	0.03	0.01	0.02	0.01	0.01	0	0.01	0.01	0	0.03	0	0.01	0	0.01	0.02	0.01	0.02	0.01	0.01	0.01	0.01	0.03	0	0.014	0.013	0.01	0.009	0.007	0.005	0.019
Gordonibacter massiliensis	0.02	0.01	0.02	0.01	0.01	0	0	0.02	0	0.01	0.01	0.01	0.01	0.01	0.03	0.01	0.02	0.01	0	0.03	0.01	0.01	0	0.03	0.01	0	0.01	0.01	0.01	0	0.01	0	0.01	0.02	0.02	0.01	0	0.02	0.01	0.01	0.02	0.01	0.009	0.011	0.006	0.006	0.004	0.004	0.014
Hungateiclostridium clariflavum	0.01	0.01	0.02	0.01	0.01	0	0.01	0.01	0.02	0.01	0.01	0.01	0.01	0.02	0.01	0.01	0.02	0.02	0.01	0.01	0.01	0.01	0.02	0.01	0.01	0.01	0	0.02	0.01	0	0.01	0	0.01	0.01	0.01	0.01	0.03	0.01	0.01	0.01	0.01	0.01	0.012	0.023	0.01	0.005	0.009	0.007	0.019
Megasphaera stantonii	0.01	0	0.01	0.01	0	0	0	0.02	0.01	0.01	0.01	0.01	0.01	0.01	0.02	0.01	0.02	0.01	0.01	0.01	0.01	0.01	0.01	0.02	0.01	0.01	0.01	0.01	0.02	0	0.02	0.01	0.01	0.01	0.01	0.02	0.02	0.02	0.01	0.02	0.01	0.01	0.018	0.029	0.023	0.009	0.01	0.01	0.033
Megasphaera elsdenii	0.01	0.01	0.01	0.01	0.01	0	0	0.02	0.01	0.01	0.01	0.01	0	0.01	0.01	0.01	0.01	0.03	0.01	0.01	0.01	0.01	0.01	0.01	0.01	0.01	0	0.01	0.02	0.01	0.01	0.01	0.01	0.01	0.01	0.01	0.02	0.01	0.02	0.04	0.01	0.01	0.014	0.107	1.092	0.009	0.011	0.011	0.11
Streptococcus viridans	0	0.09	0	0.01	0	0	0	0	0.02	0	0.01	0.01	0	0.01	0	0.15	0	0.01	0.01	0.01	0	0	0.01	0	0	0.03	0	0	0	0.03	0	0	0.01	0	0.01	0	0.03	0	0	0.01	0	0.01	0.003	0.004	0.017	0.004	0.002	0.002	0.003
Fusobacterium varium	0.01	0	0.01	0.03	0.01	0	0.03	0.01	0	0.01	0.01	0.01	0	0.02	0.01	0	0.01	0.01	0	0	0.01	0.01	0	0.01	0.02	0.01	0	0.02	0.01	0	0.01	0.04	0.01	0.01	0.03	0	0.03	0.01	0.03	0.01	0	0.02	0.004	0.015	0.013	0.021	0.007	0.004	0.011
Chryseobacterium gallinarum	0	0	0.1	0	0.01	0.01	0	0	0	0.11	0	0.01	0	0	0	0	0.07	0	0	0	0	0	0	0.02	0	0.01	0	0	0	0	0.08	0	0.01	0	0	0	0	0.04	0	0	0	0	0.005	0.05	0.003	0.008	0.002	0.002	0.05
Chryseobacterium indologenes	0.01	0	0.02	0	0.02	0.01	0.01	0	0.02	0.03	0	0.02	0.01	0.01	0	0	0.02	0.01	0.01	0	0.01	0.01	0.03	0.01	0	0.02	0.01	0	0.01	0	0.02	0.01	0.01	0.01	0.01	0.01	0.05	0.02	0.01	0.01	0	0	0.006	0.03	0.005	0.01	0.018	0.004	0.027
Draconibacterium orientale	0	0	0.02	0	0.02	0.02	0.01	0	0.02	0.03	0	0.03	0.01	0	0	0	0.02	0	0.01	0	0.01	0.01	0.02	0.01	0	0.02	0.01	0.01	0.01	0	0.03	0	0.02	0.01	0.01	0.01	0.06	0.02	0	0.01	0	0	0.009	0.035	0.006	0.014	0.013	0.003	0.034
Weissella confusa	0	0	0.02	0	0	0	0	0.01	0	0	0	0	0.01	0	0.01	0.04	0.01	0	0	0.05	0	0.02	0.06	0	0	0.02	0	0	0.06	0.01	0	0	0.01	0	0	0.05	0	0	0	0	0.07	0	0.012	0.004	0.097	0.003	0.004	0.001	0.004
Clostridium sp. DL-VIII	0.02	0.01	0.01	0.01	0.01	0	0.01	0.01	0.01	0.01	0.01	0.01	0	0.02	0.01	0.01	0.01	0.01	0.01	0.01	0.01	0.01	0.01	0.01	0.01	0.01	0	0.03	0.02	0	0.01	0	0.01	0.01	0.01	0.01	0.02	0.01	0.01	0.02	0.01	0.01	0.009	0.017	0.031	0.007	0.014	0.01	0.013
Faecalibaculum rodentium	0.01	0.01	0.02	0.01	0.01	0	0	0.02	0	0.02	0.01	0.01	0.01	0.01	0.01	0.01	0.02	0.01	0.01	0.01	0.01	0.01	0.01	0.02	0	0.01	0.01	0.01	0.02	0	0.02	0	0.01	0.01	0.01	0.02	0	0.02	0.01	0.01	0.01	0.01	0.016	0.02	0.01	0.016	0.014	0.016	0.022
Actinomyces sp. oral taxon 414	0	0.01	0	0.02	0	0	0.01	0.01	0	0	0	0	0	0.03	0.01	0.01	0	0.01	0	0.01	0.05	0	0.01	0	0	0	0	0.05	0	0.02	0	0	0	0	0.1	0	0.01	0.01	0	0.01	0.01	0.05	0.003	0.002	0.002	0.001	0.001	0.001	0.003
Clostridium cellulovorans	0.02	0.01	0.01	0.01	0.01	0	0.01	0.01	0.01	0.01	0.01	0.01	0.01	0.01	0.01	0.01	0.01	0.02	0	0.01	0.01	0.01	0	0.01	0.01	0.01	0	0.02	0.02	0	0.01	0.01	0.01	0.01	0.01	0.01	0.02	0.01	0.02	0.01	0.01	0.01	0.009	0.024	0.019	0.007	0.012	0.015	0.018
Clostridium argentinense	0.01	0.01	0.01	0.01	0.01	0	0.01	0.01	0.01	0.01	0.01	0.01	0.01	0.02	0.01	0.01	0.01	0.02	0.01	0.01	0.01	0.01	0.01	0.01	0	0.01	0	0.02	0.01	0.01	0.01	0.01	0.01	0.01	0.01	0.01	0.01	0.01	0.01	0.02	0.01	0.01	0.011	0.014	0.025	0.006	0.013	0.006	0.01
Streptococcus sp. oral taxon 431	0	0.02	0.01	0.01	0	0	0	0	0.01	0	0.02	0.01	0	0.01	0	0.12	0.01	0.01	0.01	0	0.01	0	0.01	0	0.01	0.01	0	0.01	0.01	0.01	0.01	0.01	0.01	0	0.01	0	0.03	0	0.01	0.02	0	0.02	0.004	0.007	0.019	0.005	0.004	0.003	0.006
Streptococcus cristatus	0.01	0.02	0.01	0	0	0	0	0.02	0.03	0.01	0	0	0	0.02	0.01	0.05	0.01	0.01	0	0	0.03	0.01	0.01	0.01	0	0.01	0	0.02	0.01	0.01	0.01	0	0	0	0.01	0.01	0.03	0.01	0	0.01	0	0.04	0.003	0.013	0.009	0.008	0.006	0.003	0.012
Rufibacter tibetensis	0	0	0.04	0	0.01	0	0.01	0	0.03	0.04	0	0.01	0	0	0	0	0.03	0	0	0	0.01	0.01	0.04	0.01	0	0.01	0	0	0.01	0	0.04	0	0.01	0	0.01	0.01	0.08	0.02	0	0	0	0	0.002	0.028	0.002	0.004	0.005	0.001	0.029
Niastella koreensis	0	0	0.03	0	0.01	0.01	0.01	0	0.03	0.03	0	0.01	0.01	0	0	0	0.02	0	0.01	0	0	0.01	0.04	0.01	0	0.01	0.01	0	0.01	0	0.03	0	0.01	0.01	0	0.01	0.08	0.02	0	0.01	0	0	0.007	0.034	0.005	0.007	0.021	0.002	0.034
Mucinivorans hirudinis	0	0	0.03	0	0.01	0.01	0	0	0.02	0.04	0	0.01	0.01	0	0	0	0.03	0	0.01	0	0	0.01	0.03	0.02	0	0.01	0.01	0	0.01	0	0.04	0	0.02	0.01	0	0.01	0.06	0.03	0	0	0	0	0.007	0.041	0.005	0.007	0.01	0.003	0.043
Pseudomonas stutzeri	0.01	0	0.02	0.01	0.01	0.01	0.01	0.01	0.01	0.02	0.01	0.01	0.01	0.01	0.01	0.01	0.01	0.01	0.01	0.01	0.01	0.01	0.02	0.01	0	0.01	0.01	0.01	0.01	0	0.01	0	0.01	0.01	0.01	0.01	0.03	0.01	0.01	0.01	0.01	0	0.013	0.026	0.006	0.007	0.008	0.006	0.03
Rhizobium leguminosarum	0.01	0	0.02	0.01	0	0.01	0.01	0.01	0.01	0.02	0.01	0.01	0.01	0.01	0.01	0.01	0.02	0.02	0.01	0.01	0.01	0.01	0.02	0.01	0.01	0.01	0.01	0	0.01	0	0.02	0	0.01	0.01	0.01	0.01	0.02	0.01	0.01	0	0.01	0	0.008	0.023	0.005	0.007	0.008	0.004	0.028
Clostridium bornimense	0.02	0.01	0.02	0.01	0.01	0	0.01	0.01	0	0.01	0.01	0.01	0.01	0.01	0.01	0.01	0.01	0.02	0.01	0.01	0.01	0.01	0	0.01	0	0.01	0.01	0.03	0.01	0	0.01	0	0.01	0.01	0.01	0.01	0.01	0.01	0.01	0.02	0.01	0.01	0.009	0.018	0.026	0.006	0.011	0.008	0.012
Slackia heliotrinireducens	0.01	0.01	0.01	0.01	0.01	0	0	0.01	0.01	0.01	0.01	0.01	0.01	0.01	0.01	0.02	0.01	0.01	0.01	0.03	0.01	0.01	0.01	0.02	0	0.01	0.01	0.01	0.01	0	0.01	0	0.01	0.02	0.01	0.01	0	0.02	0.01	0.02	0.01	0	0.01	0.018	0.007	0.01	0.005	0.004	0.019
Sphingobacterium thalpophilum	0	0	0.02	0	0.02	0.01	0.01	0	0.03	0.02	0	0.02	0.01	0	0	0	0.02	0	0.01	0	0.01	0.01	0.04	0.01	0	0.02	0.01	0	0.01	0	0.02	0	0.01	0.01	0	0.01	0.07	0.02	0	0	0	0	0.006	0.026	0.004	0.009	0.009	0.001	0.026
Lactococcus garvieae	0	0	0.02	0	0	0	0.03	0.03	0	0.01	0	0	0	0	0.02	0.03	0.01	0.01	0.01	0.01	0	0.01	0	0.01	0	0	0.03	0.02	0.02	0	0	0	0	0	0	0.01	0	0.01	0	0	0.01	0.12	0.015	0.003	0.013	0.002	0.003	0.002	0.002
Enterococcus faecalis	0.02	0	0.01	0.01	0.01	0	0.02	0.01	0	0.01	0	0.01	0	0.01	0.01	0.01	0.01	0.01	0.01	0	0	0.01	0	0.01	0	0.01	0	0.05	0.03	0.05	0.02	0	0	0.01	0.01	0.01	0	0.03	0.01	0.01	0	0	0.012	0.009	0.015	0.006	0.011	0.007	0.009
Cupriavidus taiwanensis	0.01	0.01	0.02	0.01	0	0	0.01	0.01	0.01	0.02	0.01	0.01	0.01	0.01	0.01	0.01	0.02	0.01	0.01	0.01	0.01	0.01	0.01	0.01	0	0.01	0.01	0.01	0.01	0	0.02	0	0.01	0.01	0.01	0.01	0.01	0.02	0.01	0.01	0.01	0	0.013	0.023	0.005	0.011	0.007	0.008	0.027
Fusobacterium periodonticum	0.01	0	0.01	0.01	0	0	0	0.01	0.12	0.01	0	0	0	0.01	0.01	0.03	0.01	0.01	0	0.01	0.01	0.01	0	0.01	0.01	0.01	0	0.01	0.01	0	0.01	0.01	0	0.01	0	0.01	0.01	0.01	0.01	0.01	0	0.01	0.007	0.023	0.018	0.004	0.004	0.009	0.015
Streptococcus sp. JS71	0	0.06	0	0.01	0	0	0	0	0.02	0	0.01	0.01	0	0.01	0	0.09	0	0.01	0.01	0.01	0.01	0	0.01	0	0.01	0.03	0	0	0.01	0.02	0	0.01	0.01	0	0.01	0	0.02	0	0.01	0.01	0	0.01	0.003	0.006	0.035	0.005	0.004	0.004	0.006
Glaciecola sp. THG-3.7	0	0	0.03	0	0.01	0	0	0	0.03	0.03	0	0.01	0	0	0	0	0.02	0.01	0	0	0	0.01	0.05	0.01	0	0.01	0	0	0.01	0	0.04	0	0.01	0	0	0.01	0.09	0.02	0.01	0	0	0	0.004	0.023	0.003	0.005	0.005	0.001	0.021
Clostridium kluyveri	0.01	0.01	0.02	0.01	0	0	0	0.01	0.01	0.02	0.01	0.01	0	0.01	0.01	0.01	0.01	0.01	0	0.01	0.01	0.01	0.01	0.01	0.01	0.01	0	0.02	0.01	0	0.02	0.01	0.01	0.01	0.01	0	0.02	0.02	0.01	0.01	0.01	0.01	0.01	0.015	0.013	0.005	0.011	0.009	0.011
Clostridium novyi	0.02	0.01	0.01	0.02	0.01	0	0.01	0.01	0	0.01	0.01	0.01	0.01	0.01	0.01	0.01	0.01	0.01	0.01	0.01	0.01	0.01	0	0.01	0.01	0.01	0	0.02	0.01	0	0.01	0	0.01	0.01	0.01	0.01	0.01	0.01	0.01	0.02	0.01	0.01	0.011	0.018	0.026	0.005	0.011	0.009	0.013
Clostridium saccharobutylicum	0.01	0.01	0.01	0.01	0	0	0.01	0.01	0	0.01	0.01	0.01	0	0.02	0.01	0.01	0.01	0.01	0.01	0.01	0.01	0.01	0	0.01	0.01	0.01	0	0.04	0.01	0	0.01	0.01	0.01	0.01	0.01	0.01	0.01	0.01	0.01	0.02	0.01	0.01	0.01	0.012	0.029	0.005	0.01	0.008	0.011
Mogibacterium diversum	0.01	0.01	0.01	0.01	0.01	0	0	0.01	0	0.01	0.01	0.01	0	0.01	0.01	0.01	0.01	0.01	0.01	0.01	0	0.01	0.01	0.01	0.01	0.01	0.01	0.01	0.01	0.01	0.01	0.01	0.01	0.01	0.01	0.01	0.01	0.01	0.02	0.01	0.02	0.02	0.005	0.008	0.007	0.003	0.005	0.004	0.008
[Eubacterium] sulci	0.01	0	0.01	0.01	0.01	0	0	0.01	0.01	0.01	0.01	0.01	0	0.01	0.01	0	0.01	0.03	0.01	0.01	0.01	0.01	0.01	0.01	0.01	0.01	0	0.01	0.01	0	0.01	0.01	0.01	0.01	0.01	0.01	0.02	0.01	0.02	0.02	0.01	0.01	0.011	0.017	0.006	0.006	0.01	0.007	0.016
Clostridium septicum	0.01	0.02	0.02	0.01	0	0	0.01	0.01	0.01	0.01	0.01	0	0.01	0.01	0	0.01	0.01	0.01	0	0.01	0.01	0.01	0.01	0.01	0	0	0	0.06	0.01	0	0.01	0	0	0.01	0.01	0.01	0.02	0.01	0.01	0.02	0.01	0.01	0.006	0.019	0.051	0.004	0.016	0.007	0.012
Clostridium sp. BNL1100	0.01	0	0.01	0.01	0.01	0	0	0.01	0	0	0.01	0.01	0.01	0.01	0.01	0.01	0.01	0.03	0.01	0.01	0.01	0.01	0	0.01	0.01	0.01	0.01	0.01	0.01	0	0.01	0.02	0.01	0.01	0.01	0.01	0	0.01	0.04	0.01	0.01	0.01	0.01	0.013	0.01	0.004	0.013	0.012	0.011
Eggerthella sp. YY7918	0.01	0	0.02	0.01	0.01	0	0	0.01	0.01	0.01	0.01	0.01	0.01	0	0.01	0	0.02	0.01	0	0.05	0	0.01	0.01	0.02	0	0	0.01	0	0.01	0	0.02	0	0.01	0.04	0	0.01	0.01	0.01	0.01	0.01	0.02	0	0.008	0.017	0.003	0.004	0.003	0.002	0.016
Parolsenella catena	0.01	0.01	0.01	0	0	0	0.01	0.02	0.02	0.01	0.01	0.01	0.01	0	0.03	0.02	0.01	0.01	0.01	0.03	0.01	0.01	0.01	0.01	0	0	0.01	0	0.02	0	0.01	0	0	0.01	0.01	0.01	0	0.01	0.01	0.01	0.03	0	0.009	0.01	0.003	0.008	0.003	0.003	0.013
Porphyromonas crevioricanis	0	0	0.03	0	0.01	0.01	0.01	0	0.02	0.03	0	0.01	0.01	0	0	0	0.02	0	0.01	0	0.01	0.01	0.02	0.02	0	0.01	0.01	0	0.02	0	0.03	0	0.02	0.01	0	0.01	0.05	0.02	0	0	0	0	0.006	0.042	0.002	0.008	0.012	0.002	0.041
Rufibacter sp. DG15C	0	0	0.04	0	0.01	0	0	0	0.03	0.05	0	0.01	0	0	0	0	0.03	0	0	0	0	0	0.04	0.01	0	0	0	0	0.01	0	0.05	0	0.01	0	0	0.01	0.08	0.02	0	0	0	0	0.001	0.033	0.001	0.003	0.008	0.001	0.034
Desulfovibrio piger	0	0	0.01	0.01	0.01	0	0	0.01	0	0.01	0	0.01	0.01	0.01	0.01	0.01	0.02	0	0.01	0	0.01	0.01	0	0.02	0.02	0.01	0.01	0.01	0.02	0	0.01	0.02	0.01	0.02	0.01	0.01	0	0.02	0.01	0.01	0.03	0.01	2.122	0.964	0.006	0.016	0.006	0.005	1.119
Listeria monocytogenes	0.02	0	0.01	0.01	0.01	0	0.01	0.03	0	0.01	0.01	0.01	0.01	0.01	0.01	0.01	0.01	0.02	0.01	0.01	0.01	0.02	0	0.01	0.01	0.01	0	0.01	0.01	0	0.01	0.01	0	0.01	0.01	0.01	0	0.01	0.01	0.01	0.01	0.01	0.006	0.01	0.012	0.004	0.007	0.007	0.008
Clostridium estertheticum	0.01	0	0.01	0.01	0.01	0	0.01	0.01	0.01	0	0.01	0.01	0.01	0.01	0.01	0	0.01	0.02	0.01	0.01	0.01	0.01	0.01	0.01	0.01	0.01	0	0.01	0.01	0	0.01	0	0.01	0.01	0.01	0.01	0.02	0.01	0.02	0.02	0.01	0.01	0.008	0.013	0.016	0.009	0.014	0.008	0.011
Petrocella atlantisensis	0.01	0	0.01	0.01	0.01	0	0.01	0.01	0.01	0.01	0.01	0	0	0.01	0.01	0.01	0.01	0.02	0.01	0.01	0.02	0.01	0.01	0.01	0.01	0.01	0	0.01	0.01	0	0.01	0.01	0.01	0.01	0.01	0.01	0.01	0.01	0.02	0.01	0	0.01	0.009	0.017	0.008	0.005	0.008	0.01	0.015
Lactobacillus fermentum	0.01	0.02	0	0	0	0	0	0.02	0.01	0	0	0	0	0	0.1	0	0	0	0.02	0	0	0.01	0	0.01	0	0	0	0	0.02	0.03	0	0	0	0	0	0.02	0.03	0	0.02	0.01	0	0.05	0.003	0.005	0.003	0.002	0.003	0.001	0.005
Porphyromonas asaccharolytica	0	0	0.03	0	0.01	0.01	0	0	0.02	0.04	0	0.01	0	0	0	0	0.03	0	0	0	0	0.01	0.02	0.01	0	0	0.01	0	0.02	0	0.04	0.01	0.01	0	0	0.01	0.06	0.02	0	0.01	0	0	0.003	0.052	0.002	0.005	0.002	0.003	0.045
Burkholderiales bacterium YL45	0	0	0.02	0	0	0	0	0	0.03	0.02	0	0	0.02	0	0	0.04	0.02	0.01	0	0	0	0	0.01	0.01	0	0	0.03	0	0	0.01	0.02	0	0	0.02	0	0	0.04	0.01	0	0	0.07	0	0.04	0.006	0.003	0.015	0.042	0.009	0.007
Clostridium sp. CT4	0.01	0.01	0.01	0.01	0	0	0.01	0.01	0.01	0.01	0.01	0	0	0.01	0.01	0.01	0.01	0.01	0.01	0.01	0.01	0.01	0.01	0.01	0	0.01	0	0.02	0.01	0	0.01	0	0.01	0.01	0.01	0.01	0.02	0.01	0.01	0.02	0.01	0.01	0.017	0.017	0.025	0.005	0.009	0.006	0.013
Chryseobacterium gleum	0.01	0	0.02	0	0.02	0.01	0.01	0	0.01	0.02	0	0.03	0.01	0.01	0	0	0.02	0.01	0.01	0	0.01	0.01	0.01	0.01	0.01	0.02	0.01	0	0.01	0	0.01	0	0.02	0	0.01	0	0.02	0.01	0.01	0.01	0	0	0.006	0.018	0.009	0.008	0.019	0.003	0.017
Sebaldella termitidis	0.01	0	0.01	0.01	0	0	0	0.01	0.02	0.01	0.01	0.01	0	0.01	0.01	0	0.01	0.01	0.01	0.01	0	0.01	0.02	0.01	0.01	0.01	0	0.01	0.01	0	0.01	0.01	0.01	0.01	0.01	0.01	0.04	0.01	0.01	0.01	0	0.01	0.007	0.011	0.008	0.005	0.005	0.004	0.011
Pseudoflavitalea sp. 5GH32-13	0	0	0.03	0	0.01	0.01	0.01	0	0.02	0.04	0	0.01	0.01	0	0	0	0.02	0	0.01	0	0	0.01	0.02	0.01	0	0.01	0.01	0	0.01	0	0.04	0	0.01	0	0	0.01	0.05	0.02	0	0	0	0	0.006	0.032	0.003	0.008	0.015	0.002	0.031
Enterobacter kobei	0	0	0.01	0	0	0	0	0	0	0	0	0	0	0	0	0.31	0	0	0	0	0.01	0	0.01	0	0	0	0	0	0	0	0	0	0	0	0	0	0.01	0	0	0	0.01	0.01	0.001	1e-05	0.002	0.003	0.003	0.002	0.001
Marinifilaceae bacterium SPP2	0	0	0.03	0	0.01	0.01	0	0	0.01	0.04	0	0.01	0	0	0	0	0.03	0	0.01	0	0	0.01	0.02	0.02	0	0.01	0	0	0.01	0	0.04	0	0.01	0.01	0	0.01	0.05	0.03	0	0	0	0	0.005	0.034	0.006	0.01	0.006	0.004	0.033
Clostridium sp. SYSU GA15002T	0.01	0.01	0.01	0.01	0.01	0	0	0.01	0	0.01	0.01	0.01	0.01	0.01	0.01	0.01	0.01	0.02	0.01	0.01	0.01	0.01	0	0.01	0.01	0.01	0	0.01	0.01	0	0.01	0.01	0.01	0.01	0.01	0.01	0	0.01	0.02	0.01	0	0.01	0.012	0.015	0.01	0.004	0.008	0.007	0.013
Clostridium isatidis	0.01	0.02	0.02	0.01	0	0	0.01	0.01	0.01	0.01	0.01	0	0	0.01	0.01	0.01	0.01	0.01	0	0.01	0.01	0.01	0.01	0	0	0.01	0	0.04	0.01	0	0.01	0	0	0.01	0.01	0	0.02	0.01	0.01	0.02	0	0.01	0.008	0.014	0.038	0.005	0.009	0.006	0.011
Paenibacillus donghaensis	0.01	0	0.02	0.01	0	0	0	0.01	0.01	0.02	0.01	0.01	0	0.01	0.01	0	0.02	0.01	0.01	0.01	0	0.01	0.01	0.01	0	0.01	0	0.01	0.01	0	0.02	0	0.01	0	0.01	0.01	0.02	0.02	0.01	0.01	0.01	0.01	0.009	0.019	0.008	0.005	0.008	0.004	0.019
Bifidobacterium dentium	0	0.08	0.01	0	0	0	0	0.01	0.04	0.01	0	0	0	0	0.01	0.01	0.01	0	0	0.01	0	0	0.04	0.01	0	0	0	0	0.01	0.02	0.01	0	0	0.01	0	0.01	0.01	0.01	0.01	0.02	0.01	0	0.005	0.012	0.016	0.002	0.014	0.003	0.01
Cellulosilyticum sp. WCF-2	0.01	0.01	0.01	0.02	0.01	0	0.01	0.01	0.01	0.01	0.01	0.01	0.01	0.02	0.01	0.01	0.01	0.02	0.01	0.01	0.01	0.01	0	0.01	0.01	0.01	0	0.01	0	0	0.01	0.01	0.01	0.01	0	0	0	0	0.02	0.01	0	0	0.006	0.009	0.011	0.005	0.027	0.011	0.009
Pedobacter heparinus	0	0	0.02	0	0.01	0.01	0.01	0	0.02	0.02	0	0.02	0.01	0	0	0	0.02	0	0.01	0	0.01	0	0.03	0.01	0	0.01	0	0	0.01	0	0.02	0	0.01	0	0.01	0.01	0.06	0.02	0	0	0	0	0.003	0.02	0.002	0.007	0.014	0.003	0.021
[Clostridium] cellulosi	0.01	0	0.01	0.01	0.01	0	0	0.01	0	0.01	0.01	0	0	0.01	0.01	0.01	0.01	0.03	0.01	0.01	0.01	0.01	0	0.01	0.01	0.01	0	0.01	0.01	0	0.01	0.01	0.01	0.01	0.01	0.01	0	0.01	0.02	0.01	0.01	0	0.025	0.016	0.007	0.005	0.011	0.003	0.017
Murdochiella vaginalis	0.01	0	0.01	0.02	0	0	0.01	0.01	0	0.01	0.01	0.01	0	0.02	0.01	0.01	0.01	0.01	0.01	0	0.01	0.01	0	0.01	0.01	0.01	0	0.02	0.01	0	0.01	0	0.01	0	0.01	0.01	0	0.01	0.02	0.02	0	0.01	0.01	0.012	0.007	0.005	0.009	0.007	0.012
Fusobacterium ulcerans	0.01	0	0	0.03	0	0	0.01	0.01	0.01	0	0.01	0.01	0	0.01	0.01	0	0	0.01	0	0.01	0.01	0.01	0.01	0	0.02	0.01	0	0.01	0.01	0	0	0.04	0	0.01	0.01	0	0.02	0.01	0.03	0.01	0	0	0.008	0.012	0.013	0.004	0.006	0.006	0.01
Pontibacter korlensis	0	0	0.03	0	0.01	0.01	0	0	0.02	0.03	0	0.01	0	0	0	0	0.02	0	0	0	0	0.01	0.03	0.01	0	0	0.01	0	0.01	0	0.03	0	0.01	0.01	0	0.01	0.06	0.02	0	0	0	0	0.003	0.019	0.003	0.004	0.007	0.002	0.019
Thermoclostridium stercorarium	0.01	0	0.01	0.01	0	0	0	0.01	0	0	0.01	0.01	0	0.01	0.01	0.01	0.01	0.03	0.01	0.01	0.01	0.01	0	0.01	0.01	0.01	0	0.01	0.01	0	0.01	0.01	0.01	0.01	0.01	0	0	0.01	0.02	0.01	0.01	0.01	0.013	0.011	0.008	0.004	0.012	0.006	0.009
Pseudomonas chlororaphis	0	0	0.02	0	0.01	0.01	0	0.01	0.02	0.02	0	0.01	0.01	0	0	0	0.02	0.01	0	0	0.01	0.01	0.03	0.01	0	0.01	0	0	0.01	0	0.02	0	0.01	0.01	0	0.01	0.04	0.02	0	0	0	0	0.008	0.016	0.004	0.006	0.008	0.003	0.018
Comamonas kerstersii	0	0	0.02	0	0	0	0	0	0	0.07	0	0	0.02	0	0	0	0.01	0	0	0	0	0	0	0.11	0	0	0	0	0	0	0.08	0	0	0	0	0	0	0.01	0	0	0.01	0	0.002	0.002	0.002	0.002	0.003	0.002	0.002
Dialister pneumosintes	0.02	0.01	0	0.03	0	0	0	0.02	0.01	0	0.01	0.01	0	0.01	0.02	0.01	0	0	0	0	0.01	0.01	0	0	0.01	0.01	0	0.01	0.01	0.01	0	0.01	0	0	0.01	0.01	0.02	0	0.01	0.02	0.01	0.01	0.006	0.031	0.012	0.001	0.003	0.003	0.028
Clostridium tetani	0.01	0.01	0.01	0.01	0.01	0	0	0.01	0	0.01	0.01	0.01	0	0.01	0.01	0.01	0.01	0.01	0.01	0.01	0.01	0.01	0	0.01	0	0.01	0	0.01	0.01	0	0.01	0	0.01	0.01	0.01	0.01	0	0.01	0.01	0.01	0.01	0.01	0.006	0.014	0.016	0.004	0.009	0.009	0.01
Geosporobacter ferrireducens	0.01	0	0.01	0.01	0	0	0	0.01	0	0	0.01	0.01	0.01	0.01	0.01	0	0.01	0.01	0.01	0.01	0.01	0.01	0	0.01	0.01	0.01	0.01	0.01	0.01	0	0.01	0.01	0.01	0.01	0.01	0.01	0	0.01	0.01	0.01	0.01	0.01	0.013	0.013	0.014	0.006	0.01	0.007	0.011
Filifactor alocis	0.01	0	0.01	0.01	0.01	0	0	0.01	0	0	0.01	0.01	0	0.01	0.01	0	0.01	0.01	0.01	0.01	0.01	0.01	0	0.01	0.01	0.01	0	0.01	0.01	0	0.01	0	0.01	0.01	0.01	0.01	0	0.01	0.02	0.02	0.01	0.01	0.006	0.019	0.008	0.005	0.009	0.011	0.017
Selenomonas sputigena	0.01	0	0.01	0.01	0	0	0.01	0.01	0.01	0.01	0.01	0	0	0.01	0.01	0.01	0.01	0.01	0.01	0	0.01	0.01	0.01	0.01	0.01	0	0	0.01	0.01	0	0.01	0	0.01	0.01	0.01	0.01	0.01	0.01	0.01	0.01	0.01	0.01	0.013	0.043	0.009	0.005	0.006	0.008	0.094
Sporanaerobacter sp. NJN-17	0.01	0	0.01	0.01	0.01	0	0	0.01	0	0.01	0.01	0.01	0.01	0.01	0.01	0	0.01	0.01	0.01	0.01	0.01	0.01	0	0.01	0	0.01	0.01	0.01	0.01	0	0.01	0	0.01	0.01	0.01	0.01	0	0.01	0.01	0.01	0.01	0.01	0.011	0.012	0.009	0.005	0.01	0.004	0.009
Treponema succinifaciens	0.01	0	0.01	0.01	0.01	0	0	0.01	0	0.01	0.01	0.01	0.01	0.01	0.01	0	0.01	0.03	0.01	0.01	0	0.01	0	0.01	0.01	0.01	0	0	0.01	0	0.01	0.01	0.01	0.01	0	0.01	0	0.01	0.02	0.01	0.01	0	0.008	0.012	0.009	0.004	0.01	0.005	0.012
Victivallales bacterium CCUG 44730	0	0	0.03	0	0	0.08	0	0.01	0.01	0.02	0	0	0.01	0	0	0	0.02	0.01	0	0	0	0.01	0.01	0.01	0	0	0	0	0.01	0	0.02	0	0.01	0	0	0.01	0.02	0.01	0.01	0.01	0	0	0.427	0.024	0.003	0.047	0.007	0.003	0.034
Hungateiclostridium thermocellum	0.01	0	0.01	0.01	0	0	0	0.01	0	0.01	0.01	0	0	0.01	0.01	0.01	0.01	0.02	0.01	0.01	0.01	0.01	0	0.01	0.01	0.01	0	0.01	0.01	0	0.01	0.01	0.01	0.01	0.01	0	0	0.01	0.02	0.01	0	0.01	0.014	0.013	0.006	0.005	0.008	0.007	0.013
Rhodopseudomonas palustris	0.01	0	0.01	0	0	0	0	0.01	0.01	0.01	0	0.01	0.01	0	0.01	0.01	0.01	0.01	0.01	0.01	0	0.01	0.01	0.01	0.01	0.01	0.01	0	0.01	0	0.01	0	0.01	0.01	0.01	0.01	0.02	0.01	0.01	0.01	0.01	0	0.014	0.017	0.008	0.008	0.007	0.005	0.023
Coriobacteriaceae bacterium 68-1-3	0.01	0	0.01	0.01	0.01	0	0	0.01	0	0.01	0.01	0.01	0.01	0	0.01	0.01	0.01	0.01	0.01	0.03	0.01	0.01	0	0.02	0	0	0	0	0.01	0	0.01	0	0	0.02	0.01	0.01	0	0.01	0.01	0.01	0.01	0	0.007	0.011	0.003	0.005	0.002	0.002	0.013
Chryseobacterium indoltheticum	0	0	0.02	0	0.01	0	0	0	0.02	0.02	0	0.01	0	0	0	0	0.02	0.01	0	0	0.01	0.01	0.03	0.01	0	0.01	0	0	0.01	0	0.02	0	0.01	0	0	0	0.07	0.01	0.01	0	0	0	0.005	0.032	0.004	0.007	0.004	0.003	0.028
Flavobacterium commune	0	0	0.02	0	0.01	0.01	0	0	0.02	0.02	0	0.01	0.01	0	0	0	0.02	0	0.01	0	0	0	0.02	0.01	0	0.01	0.01	0	0.01	0	0.03	0	0.01	0	0	0.01	0.05	0.02	0	0	0	0	0.004	0.014	0.003	0.008	0.018	0.003	0.012
Elizabethkingia anophelis	0	0	0.01	0	0.01	0.02	0.01	0	0.02	0.02	0	0.01	0.01	0	0	0	0.02	0	0.01	0	0.01	0.01	0.03	0.01	0	0.01	0.01	0	0.01	0	0.01	0	0.01	0	0	0	0.05	0.01	0	0	0	0	0.005	0.02	0.003	0.007	0.014	0.003	0.02
Pedobacter steynii	0	0	0.02	0	0.01	0.01	0.01	0	0.02	0.02	0	0.01	0	0	0	0	0.01	0	0	0	0.01	0.01	0.03	0.01	0	0.01	0	0	0.01	0	0.02	0	0.01	0	0.01	0.01	0.05	0.01	0.01	0	0	0	0.004	0.015	0.003	0.008	0.009	0.003	0.014
Solitalea canadensis	0	0	0.01	0	0.01	0.01	0.01	0	0.03	0.02	0	0.01	0	0	0	0	0.01	0	0	0	0	0.01	0.03	0.01	0	0.01	0	0	0.01	0	0.02	0	0.01	0	0	0.01	0.08	0.01	0	0	0	0	0.005	0.035	0.005	0.005	0.006	0.002	0.031
Sphingobacteriaceae bacterium GW460-11-11-14-LB5	0	0	0.03	0	0.01	0	0	0	0.02	0.03	0	0.01	0	0	0	0	0.02	0	0	0	0	0	0.03	0.01	0	0.01	0	0	0.01	0	0.03	0	0.01	0	0	0.01	0.06	0.02	0	0	0	0	0.004	0.031	0.004	0.008	0.007	0.002	0.031
Duncaniella sp. C9	0	0	0	0	0.08	0.03	0	0	0	0	0	0.07	0	0	0	0	0	0	0.03	0	0.05	0	0	0	0	0.05	0	0	0	0	0	0	0	0	0	0	0	0	0	0	0	0	1e-05	1e-05	1e-05	1e-05	1e-05	1e-05	1e-05
Thermoanaerobacterium thermosaccharolyticum	0.01	0	0.01	0.01	0	0	0	0.01	0.01	0.01	0.01	0	0	0.01	0.01	0	0.01	0.02	0.01	0.01	0.01	0.01	0.01	0.01	0.01	0.01	0	0.01	0.01	0	0.01	0.01	0.01	0.01	0	0	0.01	0.01	0.01	0.01	0	0	0.007	0.016	0.009	0.004	0.006	0.006	0.013
Megasphaera hexanoica	0.01	0	0.01	0.01	0	0	0	0.01	0.01	0.01	0	0.01	0	0.01	0.01	0.01	0.01	0.01	0.01	0	0	0.01	0.01	0.01	0	0.01	0	0	0.01	0	0.01	0	0.01	0.01	0.01	0.01	0.02	0.01	0.01	0.02	0	0.01	0.013	0.036	0.028	0.005	0.008	0.005	0.037
Magnetospirillum gryphiswaldense	0.01	0.01	0.02	0.01	0.01	0.01	0.01	0.01	0	0.02	0.01	0.01	0.01	0.01	0.01	0.01	0.02	0.01	0.01	0.01	0.01	0.01	0	0.02	0.01	0.01	0	0	0	0	0.01	0	0	0	0	0	0	0.01	0	0	0	0	0.004	0.004	0.002	0.001	0.003	0.001	0.005
Shewanella sp. WE21	0	0	0.03	0	0	0	0	0	0.03	0.04	0	0	0	0	0	0	0.02	0	0	0	0	0	0.04	0.01	0	0	0	0	0	0	0.03	0	0	0	0	0	0.08	0.02	0	0	0	0	1e-05	0.005	1e-05	1e-05	0.002	0.001	0.004
Citrobacter portucalensis	0	0	0	0	0	0	0	0	0	0	0	0	0	0	0	0.11	0	0	0	0	0	0	0	0	0	0	0	0.01	0	0.1	0	0	0	0	0	0	0	0	0	0	0.08	0	0.027	1e-05	0.001	1e-05	0.001	1e-05	0.001
Dehalobacterium formicoaceticum	0.01	0	0.01	0.01	0	0	0.01	0.01	0	0.01	0.01	0	0	0.02	0.01	0.01	0.01	0.01	0.01	0.01	0.01	0.01	0	0.01	0	0.01	0	0.01	0.01	0	0.01	0	0.01	0	0.01	0.01	0	0.01	0.01	0.01	0	0.01	0.01	0.01	0.007	0.004	0.011	0.004	0.009
Achromobacter xylosoxidans	0.01	0	0.01	0.01	0.01	0.01	0.01	0.01	0.01	0.01	0.01	0.01	0.01	0.01	0.01	0.01	0.01	0.01	0.01	0.01	0.01	0.01	0.01	0.01	0	0.01	0	0	0	0	0	0	0.01	0.01	0.01	0	0	0.01	0	0	0.01	0	0.01	0.008	0.005	0.006	0.005	0.005	0.01
Lactobacillus pentosus	0	0.02	0	0	0	0	0	0.01	0.01	0	0.01	0.02	0	0	0.01	0	0	0.03	0	0	0.01	0.01	0.01	0	0	0	0	0.01	0.03	0	0.01	0	0.01	0	0.01	0	0.03	0.01	0.01	0.01	0	0.02	0.003	0.009	0.004	0.002	0.003	0.001	0.01
Proteus mirabilis	0.01	0	0.01	0	0	0	0.13	0	0.01	0.01	0	0	0	0	0	0	0	0	0	0	0	0.01	0.01	0	0	0	0	0.09	0	0	0	0	0	0	0	0	0.01	0	0	0	0	0	0.002	0.005	0.003	0.002	0.005	0.003	0.004
Corynebacterium glutamicum	0	0.01	0.02	0	0	0	0	0.01	0.02	0.02	0	0	0.01	0.01	0.01	0.01	0.02	0.01	0.01	0.01	0.01	0.01	0.03	0.01	0	0.01	0	0	0	0	0.01	0	0	0	0	0	0.03	0.01	0	0	0	0	0.003	0.006	0.002	0.001	0.003	0.001	0.005
Clostridium carboxidivorans	0.01	0	0.02	0.01	0	0	0	0.01	0	0.02	0	0	0	0.01	0.01	0.01	0.01	0.01	0	0.01	0.01	0.01	0	0.01	0	0.01	0	0.02	0.01	0	0.01	0	0.01	0.01	0	0.01	0	0.01	0.01	0.01	0	0.01	0.007	0.011	0.013	0.004	0.006	0.006	0.009
Olsenella sp. oral taxon 807	0.01	0	0.01	0.01	0	0	0	0.01	0.01	0.01	0	0	0	0.01	0.01	0.01	0.01	0.01	0	0.01	0	0.01	0.01	0.01	0	0	0	0.01	0.01	0	0.01	0	0	0.01	0.01	0.01	0.02	0.02	0	0.01	0.01	0.01	0.005	0.009	0.004	0.003	0.003	0.004	0.011
Denitrobacterium detoxificans	0.01	0	0.01	0.01	0.01	0	0	0.01	0	0	0	0.01	0.01	0	0.01	0.01	0.01	0.01	0.01	0.03	0	0.01	0	0.01	0	0	0.01	0	0.01	0	0.01	0	0.01	0.02	0	0.01	0	0.01	0.01	0.01	0.01	0	0.009	0.012	0.005	0.005	0.004	0.004	0.013
Parvimonas micra	0	0	0.01	0.01	0	0	0	0.01	0	0	0.01	0	0	0.02	0	0	0.01	0.01	0	0.01	0.01	0.01	0	0.01	0	0.01	0	0.01	0.01	0	0.01	0	0.01	0	0.01	0.01	0	0.01	0.01	0.02	0	0.05	0.008	0.008	0.006	0.004	0.008	0.003	0.008
Echinicola vietnamensis	0	0	0.02	0	0.01	0	0.01	0	0.02	0.02	0	0.01	0	0	0	0	0.02	0	0	0	0.01	0	0.03	0.01	0	0.01	0	0	0.01	0	0.02	0	0.01	0	0	0	0.06	0.01	0	0	0	0	0.005	0.015	0.005	0.005	0.005	0.002	0.015
Pseudopedobacter saltans	0	0	0.01	0	0.01	0.01	0.01	0	0.01	0.02	0	0.02	0.01	0	0	0	0.01	0	0.01	0	0.01	0.01	0.01	0.01	0	0.01	0.01	0	0.01	0	0.01	0	0.01	0	0	0.01	0.03	0.01	0	0.01	0	0	0.006	0.011	0.005	0.008	0.017	0.003	0.011
Desulfitobacterium hafniense	0.01	0	0.01	0.01	0	0	0	0.01	0.01	0.01	0	0	0	0.01	0.01	0	0.01	0.01	0.01	0.01	0	0.01	0.01	0.01	0	0	0	0.01	0.01	0	0.02	0	0.01	0.01	0	0.01	0.01	0.01	0.01	0.01	0.01	0	0.01	0.013	0.006	0.006	0.008	0.005	0.013
Pseudopropionibacterium propionicum	0	0.02	0.01	0.01	0	0	0.01	0	0	0.01	0	0	0	0.01	0	0.01	0.01	0.01	0	0	0.02	0	0.01	0	0	0	0	0.01	0	0.01	0.01	0.01	0.01	0	0.02	0	0	0.01	0.01	0.03	0	0.02	0.002	0.008	0.004	0.001	0.002	0.001	0.009
Spirosoma sp. KCTC 42546	0	0	0.02	0	0.01	0	0	0	0.02	0.03	0	0.01	0	0	0	0	0.02	0	0	0	0	0	0.02	0.01	0	0.01	0	0	0.01	0	0.03	0	0.01	0	0	0	0.05	0.02	0	0	0	0	0.003	0.029	0.003	0.006	0.01	0.001	0.026
Veillonella rodentium	0.01	0.02	0	0	0	0	0	0.01	0.02	0	0	0	0	0.01	0	0	0	0	0	0	0.01	0.01	0.05	0	0	0.04	0	0	0.01	0.03	0	0	0	0	0.01	0	0.01	0.01	0	0.01	0	0.01	0.004	0.013	0.061	0.002	0.003	0.009	0.012
Pediococcus acidilactici	0	0	0	0	0	0	0	0	0	0	0	0	0	0	0	0	0	0	0	0	0	0	0	0	0	0	0	0	0.01	0.26	0	0	0	0	0	0	0	0	0	0	0	0	0.001	0.006	0.003	0.001	0.002	0.002	0.005
Alkalitalea saponilacus	0	0	0.01	0	0.01	0.01	0.01	0	0.01	0.02	0	0.01	0.01	0	0	0	0.01	0	0.01	0	0.01	0.01	0.01	0.01	0	0.01	0.01	0	0.01	0	0.02	0	0.01	0	0.01	0.01	0.03	0.01	0	0	0	0	0.004	0.028	0.004	0.009	0.012	0.002	0.026
Riemerella anatipestifer	0	0	0.02	0	0.01	0.01	0	0	0.01	0.02	0	0.01	0.01	0	0	0	0.02	0	0	0	0	0.01	0.01	0.02	0	0.01	0	0.01	0.01	0	0.02	0	0.01	0	0	0.01	0.03	0.02	0	0	0	0	0.005	0.009	0.006	0.007	0.01	0.003	0.008
Clostridium tyrobutyricum	0.01	0	0.01	0.01	0	0	0	0.01	0.01	0	0.01	0	0	0.01	0	0	0.01	0.01	0	0.01	0.01	0.01	0.01	0	0.01	0.01	0	0.01	0.01	0	0.01	0.01	0	0.01	0	0	0.02	0.01	0.02	0.01	0	0	0.006	0.01	0.012	0.005	0.008	0.007	0.008
Sporosarcina ureae	0.01	0	0.01	0.01	0	0	0	0.01	0	0.01	0.01	0	0	0.01	0.01	0	0.01	0.01	0.01	0.01	0.01	0.01	0	0.01	0	0	0	0.01	0.01	0	0.01	0	0.01	0.01	0.01	0.01	0	0.01	0.01	0.01	0	0.01	0.011	0.008	0.009	0.005	0.006	0.004	0.007
Streptococcus acidominimus	0	0	0.01	0.01	0	0	0	0.01	0	0	0	0.01	0	0.03	0	0.01	0.01	0.01	0.01	0	0.02	0	0	0.01	0	0	0	0.03	0.01	0	0.01	0.01	0.01	0	0.01	0	0	0.01	0.01	0.01	0	0.01	0.011	0.008	0.007	0.008	0.011	0.005	0.007
Dyadobacter fermentans	0	0	0.02	0	0.01	0.01	0	0	0.01	0.03	0	0.01	0.01	0	0	0	0.02	0	0.01	0	0	0	0.01	0.01	0	0	0.01	0	0.01	0	0.02	0	0.01	0.01	0	0.01	0.02	0.02	0	0	0	0	0.006	0.019	0.003	0.006	0.007	0.002	0.02
Flammeovirgaceae bacterium 311	0	0	0.02	0	0.01	0	0.01	0	0.01	0.02	0	0.01	0	0	0	0	0.02	0	0	0	0.01	0.01	0.01	0.01	0	0.01	0	0	0.01	0	0.03	0	0.01	0	0.01	0.01	0.02	0.02	0	0	0	0	0.006	0.019	0.003	0.008	0.006	0.003	0.021
Pedobacter sp. eg	0	0	0.02	0	0.01	0.01	0	0	0.01	0.02	0	0.01	0	0	0	0	0.02	0	0	0	0	0.01	0.01	0.01	0	0.01	0.01	0	0.01	0	0.03	0	0.01	0	0	0.01	0.03	0.02	0	0	0	0	0.006	0.014	0.003	0.009	0.009	0.003	0.014
Paenibacillus sp. JDR-2	0	0	0.01	0.01	0	0	0	0.01	0.01	0.01	0	0.01	0	0.01	0	0	0.01	0.01	0.01	0.01	0	0.01	0.01	0.01	0	0	0	0.01	0.01	0	0.02	0	0.01	0	0.01	0.01	0.02	0.01	0.01	0.01	0	0	0.008	0.011	0.007	0.005	0.005	0.003	0.012
Hungateiclostridium saccincola	0.01	0	0.01	0.01	0	0	0	0.01	0	0	0.01	0.01	0	0.01	0.01	0.01	0.01	0.02	0.01	0.01	0.01	0.01	0	0	0.01	0.01	0	0.01	0.01	0	0	0	0.01	0.01	0	0	0	0.01	0.01	0.01	0	0	0.008	0.012	0.006	0.003	0.007	0.004	0.009
Ruminiclostridium cellulolyticum	0.01	0	0.01	0.01	0	0	0	0.01	0	0	0.01	0	0	0.01	0.01	0	0.01	0.02	0.01	0.01	0.01	0.01	0	0.01	0	0.01	0	0.01	0.01	0	0.01	0	0.01	0	0.01	0	0	0.01	0.01	0.01	0	0.01	0.013	0.009	0.008	0.004	0.011	0.005	0.008
Halocella sp. SP3-1	0.01	0	0.01	0.01	0	0	0	0.01	0.01	0.01	0.01	0.01	0	0.01	0	0	0.01	0.02	0	0	0.01	0.01	0.01	0	0.01	0	0	0.01	0.01	0	0.01	0.01	0.01	0	0	0	0.01	0.01	0.01	0.01	0	0	0.006	0.007	0.007	0.004	0.009	0.004	0.006
Enterococcus cecorum	0	0	0.01	0.01	0.01	0	0.01	0	0	0.01	0.01	0.01	0	0.01	0	0	0.01	0.01	0.01	0.01	0.01	0	0	0.01	0	0.01	0	0.02	0	0.01	0.01	0	0.01	0	0.01	0	0	0.01	0.01	0.01	0	0.01	0.015	0.02	0.007	0.004	0.017	0.009	0.014
Paenibacillus bovis	0	0	0	0.01	0	0	0.01	0.01	0	0	0.01	0.01	0	0.01	0	0	0.01	0.01	0.01	0.01	0.01	0.01	0	0.01	0.01	0.01	0	0.01	0.01	0	0.01	0	0.01	0	0.01	0.01	0	0.01	0.01	0.01	0	0.01	0.005	0.007	0.006	0.005	0.006	0.004	0.007
Zunongwangia profunda	0	0	0.03	0	0.01	0.01	0.01	0	0.01	0.03	0	0.01	0.01	0	0	0	0.02	0	0.01	0	0.01	0.01	0.01	0.01	0	0.01	0	0	0.01	0	0.01	0	0.01	0	0	0	0.01	0.01	0	0	0	0	0.005	0.011	0.003	0.005	0.007	0.002	0.01
Pedobacter sp. PACM 27299	0	0	0.01	0	0.01	0.01	0	0	0.01	0.01	0	0.02	0.01	0	0	0	0.01	0.01	0.01	0	0	0	0.02	0.01	0	0.01	0.01	0	0.01	0	0.01	0	0.01	0	0	0.01	0.04	0.01	0	0	0	0	0.005	0.019	0.006	0.009	0.016	0.003	0.018
Haemophilus pittmaniae	0	0.01	0	0	0	0	0	0	0.01	0	0	0	0	0	0	0.03	0	0	0.01	0	0.01	0	0.01	0	0	0.06	0	0.02	0.01	0.01	0.01	0	0.01	0	0.01	0	0.01	0	0	0.02	0	0.01	0.001	0.001	0.005	1e-05	0.002	0.005	0.001
Calditerrivibrio nitroreducens	0	0	0.04	0	0	0	0	0	0.01	0.04	0	0	0	0	0	0	0.03	0	0	0	0	0.01	0.01	0.02	0	0	0	0	0.01	0	0.04	0	0	0	0	0.01	0.01	0.02	0	0	0	0	0.002	0.025	0.002	0.001	0.003	1e-05	0.02
Candidatus Azobacteroides pseudotrichonymphae	0	0	0.02	0	0.01	0.01	0	0	0.01	0.02	0	0.02	0	0	0	0	0.02	0	0	0	0	0.01	0.01	0.02	0	0.01	0	0	0.01	0	0.02	0	0.01	0	0	0.01	0.02	0.02	0	0	0	0	0.005	0.018	0.005	0.009	0.007	0.001	0.017
Psychroflexus torquis	0	0	0.01	0	0	0	0	0	0.04	0.01	0	0	0	0	0	0	0.01	0	0	0	0	0	0.03	0	0	0	0	0	0	0	0.01	0	0	0	0	0	0.13	0.01	0	0	0	0	0.002	0.011	0.001	0.003	0.001	0.001	0.008
Phoenicibacter congonensis	0.01	0.01	0	0.01	0	0	0	0.01	0.01	0	0.01	0	0	0.01	0.02	0.01	0	0.01	0	0.02	0	0.01	0.01	0	0	0	0	0.01	0.01	0	0	0	0	0.01	0.01	0.01	0	0	0.01	0.01	0.01	0.01	0.005	0.005	0.003	0.002	0.003	0.003	0.004
Pannonibacter phragmitetus	0.01	0	0.01	0.01	0	0	0	0.01	0	0.01	0.01	0.01	0.01	0	0.01	0.01	0.02	0.01	0.01	0.01	0.01	0.01	0.01	0.01	0	0.01	0	0	0	0	0.01	0	0	0	0	0.01	0	0.01	0.01	0	0	0	0.005	0.006	0.002	0.002	0.002	0.003	0.007
Mogibacterium pumilum	0.01	0	0.01	0.01	0	0	0	0.01	0	0.01	0.01	0	0	0.01	0.01	0.01	0.01	0.02	0.01	0.01	0	0.01	0	0	0.01	0	0	0	0.01	0	0.01	0.01	0	0	0	0.01	0	0.01	0.02	0.01	0	0	0.005	0.013	0.007	0.004	0.007	0.005	0.014
Streptococcus sp. I-G2	0	0.04	0	0	0	0	0	0	0.01	0	0	0.01	0	0.01	0	0.07	0	0	0.01	0	0.01	0	0	0	0	0.02	0	0	0.01	0.01	0	0	0.01	0	0.01	0	0.01	0	0	0.01	0	0	0.002	0.003	0.023	0.004	0.003	0.003	0.003
Klebsiella michiganensis	0	0	0.01	0	0	0	0.01	0	0.01	0.01	0.01	0.02	0.01	0.01	0	0.05	0.01	0.01	0.01	0.01	0.01	0	0.03	0	0	0.01	0	0.01	0	0	0	0	0	0	0	0	0	0	0	0	0	0	0.004	0.003	0.001	0.002	0.003	0.004	0.003
Cellulosilyticum lentocellum	0.01	0	0.01	0.01	0	0	0.01	0.01	0	0	0.01	0	0	0.02	0.01	0.01	0.01	0.02	0	0.01	0.02	0.01	0	0.01	0.01	0.01	0	0.01	0	0	0	0	0	0	0.01	0	0	0	0.01	0	0	0.01	0.004	0.006	0.005	0.001	0.002	0.003	0.006
Clostridium formicaceticum	0.01	0	0.01	0.01	0.01	0	0	0	0.01	0.01	0	0.01	0	0.01	0	0	0.01	0	0	0	0.01	0.01	0.01	0.01	0	0.01	0	0.01	0.01	0	0.01	0	0.01	0.01	0	0	0.02	0.01	0.01	0.01	0	0	0.004	0.011	0.007	0.006	0.008	0.004	0.01
Hathewaya histolytica	0.01	0	0.01	0.01	0	0	0	0.01	0.01	0.01	0.01	0	0	0.01	0	0	0.01	0.01	0	0.01	0.01	0.01	0.01	0.01	0	0	0	0.01	0.01	0	0.01	0	0	0.01	0	0	0.02	0.01	0.01	0.01	0	0	0.004	0.006	0.008	0.002	0.005	0.004	0.005
Paenibacillus odorifer	0.01	0	0.01	0.01	0	0	0	0.01	0.01	0.01	0	0	0	0.01	0.01	0	0.01	0.01	0	0.01	0	0.01	0.01	0.01	0	0	0	0.01	0.01	0	0.02	0	0	0	0	0.01	0.02	0.01	0.01	0.01	0	0	0.004	0.012	0.009	0.005	0.005	0.005	0.012
Actinomyces sp. oral taxon 171	0.01	0.02	0	0.01	0	0	0	0.01	0.01	0	0	0	0	0.01	0.03	0.01	0	0	0	0.01	0.01	0	0.01	0.01	0	0	0	0	0	0.01	0	0	0	0	0.02	0.01	0	0.01	0	0.02	0.01	0.01	1e-05	0.001	0.003	0.001	0.001	1e-05	0.001
Enterococcus durans	0	0	0	0	0.01	0.01	0.03	0.01	0	0	0	0.01	0.01	0.03	0	0.01	0	0	0.01	0	0.02	0	0	0	0	0.01	0	0	0.01	0.07	0	0	0	0	0	0	0	0	0	0	0	0	0.001	0.001	0.001	1e-05	0.001	1e-05	0.001
Corynebacterium argentoratense	0	0	0	0	0	0	0	0	0	0	0	0	0.01	0	0	0	0	0	0	0.04	0	0	0	0	0	0	0.01	0	0	0	0	0	0	0.01	0	0	0	0	0	0	0.17	0	0.001	0.001	1e-05	0.001	0.006	1e-05	0.002
Capnocytophaga sputigena	0	0	0.02	0	0.01	0.01	0.01	0	0.01	0.02	0	0.01	0.01	0	0	0	0.02	0	0	0	0.01	0	0.02	0.01	0	0.01	0	0	0	0	0.02	0	0.01	0	0	0	0.03	0.01	0	0	0	0	0.004	0.02	0.006	0.008	0.009	0.002	0.016
Capnocytophaga haemolytica	0	0	0.03	0	0.01	0	0	0	0.01	0.03	0	0.01	0	0	0	0	0.02	0	0	0	0	0	0.01	0.01	0	0.01	0	0	0.01	0	0.03	0	0.01	0	0	0	0.03	0.02	0	0	0	0	0.003	0.023	0.002	0.005	0.005	0.001	0.021
Pontibacter akesuensis	0	0	0.02	0	0.01	0.01	0.01	0	0.01	0.02	0	0.01	0	0	0	0	0.02	0	0.01	0	0	0	0.01	0.01	0	0.01	0	0	0.01	0	0.02	0	0.01	0	0	0.01	0.03	0.01	0	0	0	0	0.006	0.035	0.001	0.004	0.003	0.001	0.035
Mucilaginibacter sp. HYN0043	0	0	0.02	0	0.01	0	0	0	0.01	0.02	0	0.01	0	0	0	0	0.02	0	0	0	0	0.01	0.02	0.01	0	0	0	0	0.01	0	0.03	0	0.01	0	0	0.01	0.03	0.02	0	0	0	0	0.005	0.025	0.002	0.004	0.006	0.002	0.027
Treponema denticola	0	0	0.01	0.01	0.01	0.01	0	0.01	0.02	0.01	0.01	0.01	0	0	0	0	0.01	0.01	0.01	0	0	0.01	0.02	0.01	0.01	0.01	0	0	0	0	0.01	0	0.01	0	0	0	0.01	0.01	0.01	0	0	0	0.006	0.007	0.005	0.005	0.007	0.004	0.006
Bacillus velezensis	0.02	0	0.01	0.01	0	0	0.01	0.02	0.01	0.02	0.01	0	0	0.02	0.01	0.01	0.01	0.01	0	0	0.01	0.01	0.01	0.01	0.01	0.01	0	0	0	0	0	0	0	0	0	0	0	0	0	0	0	0	0.003	0.004	0.005	0.002	0.002	0.003	0.003
Clostridium sp. JN-9	0.01	0	0.01	0.01	0	0	0	0.01	0.01	0.01	0.01	0	0	0.01	0	0	0.01	0.01	0	0.01	0	0.01	0.01	0.01	0	0	0	0.01	0.01	0	0.01	0	0.01	0.01	0	0	0.01	0.01	0.01	0.01	0	0	0.007	0.012	0.011	0.004	0.007	0.005	0.008
Syntrophobotulus glycolicus	0.01	0	0.01	0.01	0	0	0	0.01	0.01	0	0	0.01	0	0	0	0	0.01	0.01	0.01	0.01	0	0.01	0.01	0.01	0	0.01	0	0	0.01	0	0.01	0	0.01	0	0	0.01	0.02	0.01	0.01	0.01	0	0	0.007	0.011	0.005	0.002	0.006	0.002	0.011
Finegoldia magna	0.01	0	0.01	0.01	0	0	0.01	0.01	0	0	0	0.01	0	0.01	0	0.01	0.01	0.01	0	0.01	0.01	0.01	0	0	0	0.01	0	0.01	0.01	0	0.01	0	0.01	0	0.01	0	0	0.01	0.01	0.01	0	0.01	0.007	0.015	0.009	0.003	0.007	0.004	0.011
Serratia marcescens	0.01	0	0.01	0.01	0	0	0.01	0.01	0.01	0.01	0	0	0	0.01	0.01	0.01	0.01	0.01	0.01	0.01	0.01	0.01	0.01	0.01	0	0	0	0.01	0	0	0.01	0	0	0	0	0	0.01	0.01	0	0	0.01	0	0.005	0.005	0.004	0.004	0.007	0.004	0.007
Mageeibacillus indolicus	0	0	0.01	0.01	0	0	0	0.01	0	0	0.01	0	0	0.01	0	0.01	0.01	0.01	0.01	0.01	0.01	0.01	0	0.01	0.01	0.01	0	0.01	0.01	0	0.01	0.01	0.01	0	0	0	0	0.01	0.01	0.01	0	0	0.011	0.013	0.015	0.003	0.008	0.005	0.012
Streptococcus sp. I-P16	0	0.04	0	0	0	0	0	0	0.01	0	0	0.01	0	0.01	0	0.07	0	0	0.01	0	0.01	0	0	0	0	0.02	0	0	0	0.01	0	0	0.01	0	0.01	0	0.01	0	0	0.01	0	0	0.002	0.004	0.025	0.005	0.003	0.003	0.003
Chryseobacterium taklimakanense	0	0	0.01	0	0.02	0.01	0.01	0	0.01	0.01	0	0.02	0.01	0	0	0	0.01	0	0.01	0	0.01	0	0.01	0.01	0	0.02	0.01	0	0	0	0.01	0	0.01	0	0	0	0.02	0.01	0	0	0	0	0.003	0.008	0.003	0.005	0.006	0.001	0.009
Spirosoma pollinicola	0	0	0.02	0	0.01	0.01	0	0	0.01	0.02	0	0.01	0	0	0	0	0.02	0	0	0	0	0	0.02	0.01	0	0	0	0	0.01	0	0.02	0	0.01	0	0	0.01	0.04	0.01	0	0	0	0	0.005	0.016	0.003	0.003	0.007	0.001	0.016
Mucilaginibacter mallensis	0	0	0.02	0	0.01	0.01	0	0	0.01	0.02	0	0.01	0	0	0	0	0.02	0	0	0	0	0	0.02	0.01	0	0.01	0	0	0.01	0	0.02	0	0.01	0	0	0	0.04	0.01	0	0	0	0	0.004	0.026	0.003	0.007	0.011	0.001	0.024
Olsenella uli	0.01	0	0.01	0	0	0	0	0.02	0	0.01	0	0	0	0	0.02	0.01	0.01	0	0.01	0.01	0	0.01	0	0.01	0	0	0	0	0.02	0	0.01	0	0	0.01	0.01	0.02	0	0.01	0	0.01	0.01	0	0.011	0.007	0.004	0.005	0.003	0.002	0.01
Citrobacter youngae	0	0	0	0	0	0	0	0	0	0	0	0	0	0	0	0.15	0	0	0	0	0	0	0	0	0	0	0	0.01	0	0.04	0	0	0	0	0	0	0	0	0	0	0.03	0	0.011	1e-05	1e-05	1e-05	0.001	0.001	0.001
Kordia sp. SMS9	0	0	0.02	0	0.01	0	0	0	0.01	0.02	0	0.01	0	0	0	0	0.02	0	0	0	0	0.01	0.01	0.01	0	0.01	0	0	0.01	0	0.02	0	0.01	0	0	0.01	0.03	0.02	0	0	0	0	0.003	0.028	0.002	0.003	0.007	0.001	0.023
Flavobacterium columnare	0.01	0	0.01	0	0.01	0.01	0.01	0	0.01	0.01	0	0.01	0	0	0	0	0.01	0	0	0	0	0.01	0.02	0.01	0	0.01	0	0	0.01	0	0.01	0	0.01	0	0	0	0.04	0.01	0	0	0	0	0.004	0.018	0.004	0.008	0.009	0.002	0.017
Clostridium sp. AWRP	0.01	0	0	0.01	0	0	0	0.01	0.01	0	0.01	0.01	0	0	0	0	0	0.01	0.01	0.01	0	0.01	0.01	0	0	0.01	0	0.01	0.01	0	0	0	0.01	0.01	0	0.01	0.02	0.01	0.01	0.01	0	0	0.006	0.011	0.01	0.003	0.006	0.004	0.008
Clostridium chauvoei	0	0.02	0.01	0.01	0	0	0.01	0	0	0.01	0	0	0	0.01	0	0.01	0	0.01	0	0	0	0.01	0	0	0	0	0	0.04	0.01	0	0.01	0	0	0.01	0	0	0.01	0.01	0.01	0.02	0	0	0.007	0.009	0.042	0.002	0.01	0.005	0.006
Gramella flava	0	0	0.02	0	0	0	0.01	0	0.01	0.03	0	0.01	0	0	0	0	0.02	0	0	0	0.01	0	0.02	0.01	0	0	0	0	0	0	0.02	0	0.01	0	0	0	0.04	0.01	0	0	0	0	0.002	0.02	0.001	0.004	0.006	0.001	0.02
Hymenobacter sp. APR13	0	0	0.02	0	0.01	0.01	0.01	0	0.01	0.03	0	0.01	0	0	0	0	0.02	0	0	0	0	0	0.02	0.01	0	0.01	0	0	0	0	0.01	0	0.01	0	0	0	0.03	0.01	0	0	0	0	0.003	0.018	0.001	0.001	0.005	0.001	0.021
Filimonas lacunae	0	0	0.02	0	0.01	0.01	0	0	0.01	0.02	0	0.02	0.01	0	0	0	0.01	0	0.01	0	0	0	0.01	0.01	0	0.01	0	0	0.01	0	0.02	0	0.01	0	0	0	0.02	0.01	0	0	0	0	0.006	0.024	0.004	0.007	0.013	0.002	0.023
Escherichia albertii	0	0	0.01	0	0	0	0.01	0	0.01	0.01	0	0	0	0.02	0	0	0.01	0	0	0	0	0	0.01	0	0	0	0	0.04	0.01	0	0.01	0	0.03	0	0	0	0.03	0.01	0	0	0.01	0	0.006	0.013	0.003	0.002	0.004	0.002	0.014
Aggregatibacter aphrophilus	0	0.01	0	0	0	0	0	0	0.01	0	0	0	0	0	0	0.02	0	0	0.01	0	0.01	0	0.01	0	0	0.04	0	0.02	0.01	0.02	0.01	0	0	0	0.01	0	0.02	0	0	0.01	0	0.01	0.002	0.004	0.007	0.002	0.003	0.004	0.004
Chryseobacterium carnipullorum	0	0	0.03	0	0.01	0.01	0	0	0.01	0.03	0	0.01	0	0	0	0	0.02	0	0	0	0	0	0.02	0.01	0	0.01	0	0	0	0	0.02	0	0.01	0	0	0	0.02	0.01	0	0	0	0	0.003	0.02	0.003	0.003	0.009	0.002	0.019
Flavobacterium anhuiense	0	0	0.01	0	0.01	0.01	0	0	0.01	0.02	0	0.01	0	0	0	0	0.01	0	0	0	0.01	0.01	0.01	0.01	0	0.01	0	0	0.01	0	0.02	0	0.01	0	0	0.01	0.03	0.01	0	0	0	0	0.008	0.014	0.004	0.007	0.006	0.002	0.013
Capnocytophaga gingivalis	0	0	0.02	0	0.01	0	0	0	0.01	0.03	0	0.01	0	0	0	0	0.02	0	0	0	0	0	0.01	0.01	0	0.01	0	0	0	0	0.03	0	0.01	0	0	0	0.03	0.02	0	0	0	0	0.003	0.021	0.002	0.004	0.004	0.002	0.022
Pontibacter sp. SGAir0037	0	0	0.02	0	0.01	0	0.01	0	0.01	0.02	0	0.01	0	0	0	0	0.01	0	0	0	0.01	0	0.01	0.01	0	0.01	0	0	0.01	0	0.02	0	0.01	0	0.01	0	0.03	0.01	0	0	0	0	0.006	0.015	0.002	0.006	0.006	0.002	0.016
Cronobacter muytjensii	0	0	0	0	0	0	0	0	0	0	0	0	0	0	0	0	0	0	0	0	0.22	0	0	0	0	0	0	0	0	0	0	0	0	0	0	0	0	0	0	0	0	0	0.002	0.002	0.001	0.001	0.002	0.001	0.002
Brevibacillus laterosporus	0.01	0	0.01	0.01	0	0	0	0.01	0	0	0	0.01	0	0.01	0.01	0	0.01	0.01	0	0.01	0	0.01	0	0.01	0	0	0	0.01	0.01	0	0.01	0	0	0.01	0	0.01	0	0.01	0.01	0.01	0.01	0	0.007	0.01	0.013	0.006	0.007	0.006	0.009
Actinomyces oris	0.01	0.02	0	0.01	0	0	0	0.01	0.01	0	0	0	0	0.01	0.03	0.01	0	0	0.01	0.01	0	0.01	0.01	0.01	0	0	0	0	0	0.01	0	0	0	0	0.01	0	0	0	0	0.02	0.01	0	1e-05	0.001	0.004	0.001	1e-05	1e-05	0.001
Paenibacillus durus	0	0	0.01	0.01	0	0	0.01	0.01	0	0.01	0.01	0	0	0.01	0	0.01	0.01	0.01	0	0	0.01	0	0	0.01	0	0	0	0.01	0.01	0	0.01	0	0	0	0.01	0.01	0	0.01	0.01	0.01	0	0.01	0.007	0.01	0.007	0.005	0.007	0.006	0.012
Paenibacillus lentus	0	0	0	0.01	0	0	0	0.01	0.01	0	0.01	0.01	0	0	0.01	0	0.01	0.01	0.01	0.01	0	0.01	0.01	0.01	0	0	0	0	0.01	0	0.01	0	0.01	0	0	0.01	0.01	0.01	0.01	0.01	0	0	0.006	0.01	0.007	0.003	0.005	0.002	0.01
Chryseobacterium shandongense	0	0	0.03	0	0.01	0	0.01	0	0	0.04	0	0.01	0	0.01	0	0	0.02	0.01	0	0	0.01	0	0	0.01	0	0.01	0	0.01	0	0	0.02	0	0	0	0	0	0	0.01	0	0	0	0	0.004	0.011	0.003	0.006	0.003	0.002	0.011
Sphingobacterium sp. CZ-2	0	0	0.01	0	0.01	0	0	0	0.01	0.01	0	0.01	0	0	0	0	0.01	0.01	0	0	0	0.01	0.01	0.01	0	0.01	0	0	0.01	0	0.02	0	0.01	0	0	0.01	0.03	0.01	0.01	0	0	0	0.003	0.021	0.003	0.007	0.012	0.003	0.019
Sphingobacterium sp. 21	0	0	0.01	0	0.01	0.01	0.01	0	0.01	0.01	0	0.01	0.01	0	0	0	0.01	0	0	0	0.01	0	0.01	0.01	0	0.01	0.01	0	0.01	0	0.01	0	0.01	0	0	0	0.03	0.01	0	0	0	0	0.004	0.017	0.005	0.01	0.008	0.005	0.017
Aggregatibacter segnis	0	0	0.01	0	0	0	0.01	0	0.01	0	0	0	0	0	0	0.01	0	0	0.01	0	0.02	0	0	0	0	0.02	0	0.03	0	0	0.01	0	0	0	0.02	0	0	0	0	0.01	0	0.05	0.002	0.004	0.003	0.001	0.001	0.003	0.004
Clostridium taeniosporum	0.01	0.01	0.01	0.01	0	0	0	0.01	0	0	0.01	0	0	0.01	0	0.01	0	0.01	0	0	0	0.01	0	0	0	0	0	0.03	0.01	0	0.01	0	0	0.01	0	0	0	0.01	0.01	0.02	0	0	0.006	0.007	0.018	0.003	0.007	0.004	0.005
Desulfallas gibsoniae	0.01	0	0.01	0.01	0.01	0	0	0.01	0	0.01	0.01	0.01	0	0.01	0	0	0.01	0.01	0.01	0	0	0	0	0	0	0.01	0	0.01	0.01	0	0.01	0	0.01	0	0	0	0	0.01	0.01	0.01	0	0	0.006	0.006	0.004	0.005	0.007	0.002	0.005
Bacillus megaterium	0.01	0	0.01	0.01	0	0	0	0.01	0.01	0.01	0.01	0.01	0	0.01	0.01	0	0.01	0.01	0.01	0.01	0.01	0.01	0	0.01	0	0.01	0	0.01	0.01	0	0	0	0	0	0	0	0	0	0	0	0	0	0.006	0.006	0.006	0.002	0.005	0.003	0.004
Bacillus coagulans	0.01	0	0.01	0.01	0.01	0	0	0.01	0	0	0	0.01	0	0.01	0	0	0.01	0.01	0.01	0.01	0	0.01	0	0.01	0	0.01	0	0	0.01	0	0.01	0	0.01	0	0	0	0	0.01	0.01	0.01	0	0	0.008	0.013	0.007	0.006	0.009	0.004	0.012
Brachyspira pilosicoli	0.01	0	0.01	0.01	0	0	0	0.01	0.01	0.01	0.01	0	0	0.01	0.01	0	0.01	0.01	0	0	0	0.01	0	0.01	0	0	0	0.01	0.01	0	0.01	0	0	0	0	0	0.01	0.01	0.01	0.01	0	0	0.003	0.008	0.009	0.002	0.004	0.003	0.005
Streptomyces lividans	0	0	0	0.01	0.01	0	0	0.01	0	0	0.01	0.01	0.02	0.01	0	0.01	0	0.03	0.01	0.01	0.01	0.01	0.01	0.02	0	0.01	0	0	0	0	0	0	0	0	0	0	0	0	0	0	0	0	0.005	0.029	1e-05	1e-05	0.003	0.002	0.016
Nostoc sp. NIES-4103	0	0	0.05	0	0	0	0	0	0	0.06	0	0	0	0	0	0	0.03	0	0	0	0	0	0	0.01	0	0	0	0	0	0	0.03	0	0	0	0	0	0.01	0.01	0	0	0	0	0.001	0.004	0.004	0.001	0.001	0.003	0.003
Pasteurella multocida	0.01	0	0.01	0	0	0	0	0.01	0.01	0.01	0	0	0	0	0	0	0.01	0.01	0.01	0	0.01	0.01	0.01	0.01	0	0.02	0	0	0.01	0	0.01	0	0	0	0	0	0.03	0.01	0	0	0	0	0.004	0.012	0.004	0.002	0.007	0.003	0.01
Flavobacteriaceae bacterium MAR_2010_188	0	0	0.02	0	0	0	0	0	0.02	0.02	0	0	0	0	0	0	0.01	0	0	0	0	0	0.03	0.01	0	0	0	0	0	0	0.02	0	0	0	0	0	0.06	0.01	0	0	0	0	0.002	0.017	0.001	0.002	0.003	1e-05	0.015
Sphingobacterium sp. ML3W	0	0	0.01	0	0.01	0.01	0.01	0	0.01	0.02	0	0.01	0	0	0	0	0.01	0	0	0	0.01	0	0.01	0.01	0	0.01	0	0	0	0	0.02	0	0.01	0	0.01	0	0.02	0.01	0	0	0	0	0.003	0.015	0.005	0.007	0.013	0.003	0.015
Streptococcus lutetiensis	0.01	0	0	0.01	0	0	0	0.01	0	0	0.02	0	0	0.03	0.01	0	0	0.02	0	0.01	0.01	0	0	0	0.01	0.01	0	0.01	0	0	0	0	0	0	0	0	0	0	0.01	0.01	0	0.01	0.001	0.005	0.004	0.002	0.001	0.001	0.004
Pelosinus sp. UFO1	0.03	0	0.01	0.01	0	0	0	0.02	0	0	0	0	0	0	0.01	0	0.01	0.01	0	0	0	0.02	0	0	0	0	0	0	0.02	0	0	0	0	0.01	0	0.01	0	0	0.01	0.01	0.01	0	0.004	0.012	0.021	0.004	0.004	0.008	0.01
Alkaliphilus metalliredigens	0.01	0	0.01	0.01	0	0	0	0.01	0	0.01	0.01	0	0	0.01	0	0	0.01	0.01	0	0.01	0	0.01	0	0.01	0	0	0	0.01	0.01	0	0.01	0	0.01	0	0	0	0	0.01	0.01	0.01	0	0	0.007	0.007	0.007	0.004	0.005	0.004	0.007
Lysinibacillus sphaericus	0.01	0	0.01	0.01	0.01	0	0	0.01	0	0.01	0.01	0.01	0	0.01	0	0	0.01	0.01	0.01	0.01	0.01	0.01	0	0.01	0	0.01	0	0	0	0	0.01	0	0	0	0	0	0	0.01	0	0	0	0	0.006	0.005	0.005	0.004	0.004	0.004	0.004
Dehalococcoides mccartyi	0	0	0.01	0.01	0	0	0	0.01	0.01	0.01	0.01	0	0	0	0.01	0	0.01	0.01	0	0.01	0	0.01	0.01	0.01	0	0	0	0	0.01	0	0.01	0	0	0	0	0	0.01	0.01	0.01	0.01	0	0	0.007	0.009	0.004	0.003	0.003	0.003	0.009
Rufibacter sp. DG31D	0	0	0.02	0	0	0	0	0	0.02	0.02	0	0	0	0	0	0	0.02	0	0	0	0	0	0.02	0.01	0	0	0	0	0	0	0.02	0	0.01	0	0	0	0.04	0.01	0	0	0	0	0.002	0.021	0.002	0.004	0.006	0.001	0.021
Robiginitalea biformata	0	0	0.02	0	0	0	0	0	0.02	0.02	0	0	0	0	0	0	0.02	0	0	0	0	0	0.03	0.01	0	0	0	0	0	0	0.02	0	0	0	0	0	0.04	0.01	0	0	0	0	0.002	0.018	0.001	0.002	0.003	0.001	0.02
Hymenobacter sp. sh-6	0	0	0.02	0	0.01	0.01	0.01	0	0	0.02	0	0.01	0.01	0	0	0	0.01	0	0.01	0	0.01	0	0	0.01	0	0.01	0	0	0	0	0.02	0	0.01	0	0.01	0	0	0.01	0	0	0	0	0.005	0.016	0.002	0.003	0.005	0.001	0.016
Flammeovirga sp. L12M1	0	0	0	0	0.01	0	0.01	0	0.02	0	0	0.01	0	0	0	0	0	0	0	0	0.01	0.01	0.02	0	0	0.01	0	0.01	0.01	0	0	0	0.01	0	0	0	0.05	0.01	0	0	0	0	0.003	0.019	0.004	0.006	0.011	0.003	0.017
Arachidicoccus sp. BS20	0	0	0.02	0	0.01	0	0	0	0.01	0.02	0	0.01	0	0	0	0	0.01	0	0	0	0	0	0.02	0.01	0	0.01	0	0	0	0	0.02	0	0.01	0	0	0	0.03	0.01	0	0	0	0	0.004	0.017	0.002	0.006	0.003	0.001	0.016
Escherichia fergusonii	0	0	0.01	0	0	0	0.01	0	0	0	0	0	0	0.01	0	0.01	0	0	0	0	0	0	0	0	0	0	0	0.01	0.13	0	0	0	0.01	0	0	0	0	0	0	0	0	0	0.003	0.001	0.002	0.001	0.002	0.001	0.001
Shigella boydii	0	0	0.02	0	0	0	0.01	0	0	0.03	0	0.01	0.01	0.06	0	0	0	0	0.01	0	0	0	0	0	0	0	0	0.01	0	0	0.01	0	0.02	0	0	0	0	0	0	0	0	0	0.001	1e-05	0.001	1e-05	0.002	1e-05	1e-05
Salinivirga cyanobacteriivorans	0	0	0.02	0	0.01	0	0	0	0.01	0.02	0	0.01	0	0	0	0	0.01	0	0	0	0	0	0.01	0.01	0	0.01	0	0	0.01	0	0.02	0	0.01	0	0	0.01	0.02	0.01	0	0	0	0	0.002	0.016	0.003	0.006	0.003	0.001	0.016
Arachidicoccus sp. KIS59-12	0	0	0.02	0	0.01	0	0	0	0.01	0.02	0	0.01	0	0	0	0	0.02	0	0	0	0	0	0.01	0.01	0	0.01	0	0	0.01	0	0.02	0	0.01	0	0	0	0.02	0.01	0	0	0	0	0.004	0.012	0.003	0.006	0.003	0.001	0.011
Pelosinus fermentans	0.03	0	0	0	0	0	0	0.02	0	0	0	0	0	0.01	0.01	0	0.01	0	0	0	0	0.02	0	0	0	0	0	0.01	0.02	0	0	0	0	0.01	0	0.01	0	0.01	0.01	0	0.01	0	0.002	0.009	0.022	0.003	0.003	0.009	0.009
Acetobacterium sp. KB-1	0.01	0	0	0.01	0	0	0	0.01	0	0	0.01	0	0	0.01	0.01	0	0.01	0.01	0	0.01	0	0.01	0	0.01	0.01	0	0	0	0.01	0	0.01	0	0	0	0	0.01	0	0.01	0.01	0.01	0	0	0.01	0.008	0.006	0.004	0.005	0.003	0.007
Peptoclostridium acidaminophilum	0.01	0	0	0	0	0	0	0.01	0.01	0	0	0	0	0.01	0.01	0	0	0.01	0	0.01	0	0.01	0.01	0	0	0	0	0.01	0.01	0	0	0	0.01	0	0.01	0.01	0.02	0	0	0.01	0	0.01	0.011	0.006	0.007	0.003	0.004	0.004	0.007
Streptococcus anginosus	0.01	0.02	0	0	0	0	0	0.01	0.01	0	0	0	0	0	0.01	0.01	0.01	0	0	0	0	0.01	0.01	0.01	0	0	0	0	0	0.02	0.01	0	0	0	0.01	0	0.01	0.01	0	0.01	0	0	0.001	0.002	0.017	0.004	0.003	0.003	0.002
Brevibacillus brevis	0.01	0	0.01	0.01	0	0	0	0.01	0.01	0.01	0	0	0	0.01	0.01	0	0.01	0.01	0	0	0	0.01	0.01	0.01	0	0	0	0	0.01	0	0.01	0	0	0	0	0	0.01	0.01	0.01	0	0	0	0.009	0.019	0.006	0.004	0.006	0.004	0.017
Desulfosporosinus youngiae	0	0	0.01	0	0	0	0	0	0.01	0.01	0	0	0	0	0	0	0.01	0.01	0	0	0	0.01	0.02	0.01	0	0	0	0	0.01	0	0.02	0	0	0	0	0.01	0.03	0.01	0.01	0	0	0	0.003	0.013	0.006	0.004	0.004	0.003	0.013
Bifidobacterium thermophilum	0	0.01	0.01	0.01	0	0	0	0.01	0.01	0.01	0.01	0	0	0	0.01	0.01	0.01	0.01	0	0.01	0	0	0.01	0	0	0	0	0	0	0	0.01	0	0	0	0	0.01	0.01	0	0	0.01	0.01	0	0.004	0.01	0.005	0.002	0.004	0.002	0.011
Capnocytophaga stomatis	0	0	0.01	0	0.01	0.01	0.01	0	0.01	0.01	0	0.01	0	0	0	0	0.01	0	0	0	0.01	0	0.01	0.01	0	0.01	0	0	0	0	0.01	0	0.01	0	0	0	0.03	0.01	0	0	0	0	0.004	0.01	0.003	0.004	0.009	0.001	0.008
Hymenobacter sp. DG01	0	0	0.02	0	0.01	0.01	0	0	0.01	0.02	0	0.01	0.01	0	0	0	0.01	0	0	0	0	0.01	0.01	0.01	0	0.01	0	0	0	0	0.01	0	0.01	0	0	0	0.01	0.01	0	0	0	0	0.004	0.013	0.001	0.004	0.008	0.001	0.015
Pseudodesulfovibrio indicus	0	0	0.01	0	0	0	0.01	0	0.01	0.01	0	0	0	0	0	0	0.01	0.01	0	0	0.01	0	0.01	0	0	0	0	0.01	0.01	0	0.01	0	0	0.01	0.01	0	0.02	0.01	0.01	0	0.01	0	0.004	0.013	0.003	0.004	0.007	0.003	0.014
Rhodobacter sphaeroides	0	0	0.02	0	0	0	0	0.01	0.01	0.02	0	0	0	0	0.01	0	0.01	0	0	0	0	0	0.01	0.01	0	0	0	0	0.01	0	0.02	0	0.01	0	0	0.01	0.02	0.01	0	0	0	0	0.006	0.018	0.004	0.005	0.002	0.003	0.02
Echinicola strongylocentroti	0	0	0.02	0	0.01	0	0	0	0.01	0.02	0	0.01	0	0	0	0	0.01	0	0	0	0	0	0.01	0.01	0	0.01	0	0	0.01	0	0.02	0	0.01	0	0	0	0.02	0.01	0	0	0	0	0.002	0.025	0.002	0.005	0.01	0.001	0.024
Clostridium acetobutylicum	0.01	0	0	0.01	0	0	0	0.01	0	0	0	0.01	0	0.01	0	0	0	0.01	0	0.01	0.01	0.01	0	0	0	0.01	0	0.01	0.01	0	0	0	0.01	0.01	0	0	0	0.01	0.01	0.01	0	0	0.004	0.012	0.015	0.006	0.006	0.006	0.008
Clostridium aceticum	0.01	0	0.01	0.01	0	0	0	0.01	0	0.01	0	0	0	0.01	0	0.01	0.01	0.01	0	0	0.01	0.01	0	0	0	0	0	0.01	0.01	0	0.01	0	0	0	0	0	0	0.01	0.01	0.01	0	0	0.006	0.01	0.01	0.005	0.012	0.003	0.01
Clostridiaceae bacterium 14S0207	0.01	0	0.01	0.01	0	0	0	0.01	0	0	0.01	0	0	0.01	0	0	0	0.01	0	0	0.01	0.01	0	0	0.01	0.01	0	0.01	0.01	0	0	0.01	0	0	0	0	0	0.01	0.01	0.01	0	0	0.005	0.009	0.011	0.003	0.004	0.003	0.007
Desulfosporosinus acidiphilus	0.01	0	0.01	0	0	0	0	0.01	0.01	0.01	0	0	0	0.01	0	0	0.01	0.01	0	0	0	0.01	0.01	0	0	0	0	0.01	0.01	0	0.01	0	0	0	0	0	0.01	0.01	0.01	0.01	0	0	0.004	0.011	0.005	0.003	0.004	0.003	0.011
Thermoanaerobacterium sp. RBIITD	0.01	0	0.01	0.01	0	0	0	0.01	0	0	0	0	0	0.01	0	0	0.01	0.01	0	0.01	0.01	0.01	0	0	0	0	0	0.01	0.01	0	0	0	0	0.01	0	0.01	0	0.01	0.01	0.01	0	0	0.005	0.011	0.009	0.003	0.005	0.006	0.008
Bacillus mesonae	0.01	0	0.01	0.01	0	0	0	0.01	0.01	0.01	0	0	0	0.01	0	0	0.01	0.01	0	0	0	0.01	0.01	0.01	0	0	0	0	0.01	0	0.01	0	0	0	0	0	0.01	0.01	0.01	0	0	0	0.006	0.01	0.008	0.003	0.004	0.003	0.01
Gottschalkia acidurici	0.01	0	0.01	0.01	0	0	0	0.01	0	0	0.01	0	0	0.01	0	0	0.01	0.01	0	0.01	0.01	0.01	0	0	0	0	0	0.01	0.01	0	0	0	0	0.01	0	0	0	0.01	0.01	0.01	0	0	0.007	0.01	0.008	0.002	0.005	0.005	0.006
Fusobacterium necrophorum	0.01	0	0	0	0	0	0.01	0.01	0	0	0	0.01	0	0.01	0	0	0	0.01	0	0	0.01	0.01	0	0	0	0.01	0	0.01	0.01	0	0	0	0.01	0	0.01	0	0	0.01	0.01	0.01	0	0.01	0.007	0.008	0.006	0.005	0.007	0.004	0.008
Selenomonas sp. oral taxon 126	0	0	0.01	0	0	0	0	0.01	0.01	0.01	0	0	0	0	0.01	0	0.01	0	0	0	0	0.01	0.02	0.01	0	0	0	0	0.01	0	0.01	0	0	0	0	0.01	0.03	0.01	0	0	0	0	0.009	0.027	0.005	0.004	0.009	0.004	0.053
Paenibacillus mucilaginosus	0	0	0.01	0	0	0	0	0.01	0	0.01	0	0	0	0	0.01	0.01	0.01	0.01	0	0.01	0	0.01	0	0.01	0	0	0	0	0.01	0	0.01	0	0	0.01	0.01	0.01	0	0.01	0.01	0	0	0	0.009	0.019	0.007	0.005	0.006	0.005	0.021
Paenibacillus glucanolyticus	0	0	0	0.01	0	0	0	0	0.01	0	0	0	0	0.01	0	0	0.01	0	0	0.01	0	0.01	0.01	0.01	0	0	0	0.01	0.01	0	0.01	0	0	0	0	0.01	0.02	0.01	0.01	0.01	0	0	0.005	0.016	0.007	0.002	0.007	0.002	0.015
Hymenobacter sedentarius	0	0	0.02	0	0	0	0	0	0.01	0.03	0	0	0	0	0	0	0.02	0	0	0	0	0	0.01	0.01	0	0	0	0	0	0	0.02	0	0.01	0	0	0	0.03	0.01	0	0	0	0	0.005	0.019	0.003	0.004	0.004	0.001	0.02
Chryseolinea sp. KIS68-18	0	0	0.01	0	0.01	0.01	0.01	0	0	0.02	0	0.01	0.01	0	0	0	0.01	0	0	0	0.01	0	0	0.01	0	0.01	0.01	0	0	0	0.01	0	0.01	0.01	0	0	0	0.01	0	0	0	0	0.005	0.011	0.002	0.007	0.009	0.003	0.013
Cedecea neteri	0	0	0.01	0	0	0	0	0	0.01	0.01	0	0	0	0.01	0	0.01	0.01	0	0	0	0	0	0.01	0.01	0	0	0	0.01	0	0	0.02	0	0.01	0	0	0	0.02	0.01	0	0.01	0.01	0	0.005	0.012	0.004	0.004	0.005	0.003	0.013
Leptolyngbya sp. PCC 7376	0	0	0.02	0	0	0	0	0	0.01	0.02	0	0	0	0	0	0	0.02	0	0	0	0	0	0.01	0.01	0	0	0	0	0	0	0.03	0	0	0	0	0	0.03	0.02	0	0	0	0	0.001	0.018	0.002	0.002	0.001	0.001	0.014
Chryseobacterium sp. 3008163	0	0	0.02	0	0.01	0	0	0	0.01	0.02	0	0.01	0	0	0	0	0.01	0	0	0	0.01	0	0.01	0.01	0	0.01	0	0	0	0	0.02	0	0.01	0	0	0	0.01	0.01	0	0	0	0	0.003	0.005	0.003	0.004	0.008	0.001	0.004
Capnocytophaga sp. oral taxon 878	0	0	0.02	0	0.01	0	0	0	0.01	0.02	0	0.01	0	0	0	0	0.01	0	0	0	0	0	0.01	0.01	0	0.01	0	0	0	0	0.02	0	0.01	0	0	0	0.02	0.01	0	0	0	0	0.002	0.01	0.002	0.005	0.007	0.001	0.01
Pedobacter ginsengisoli	0	0	0.01	0	0.01	0	0	0	0.01	0.02	0	0.01	0	0	0	0	0.01	0	0	0	0	0	0.01	0.01	0	0.01	0	0	0.01	0	0.02	0	0.01	0	0	0	0.02	0.01	0	0	0	0	0.003	0.019	0.005	0.006	0.002	0.002	0.018
Sphingobacterium mizutaii	0	0	0.01	0	0.01	0.01	0	0	0.01	0.01	0	0.01	0	0	0	0	0.01	0	0	0	0	0	0.01	0.01	0	0.01	0	0	0.01	0	0.01	0	0.01	0	0	0	0.03	0.01	0	0	0	0	0.002	0.007	0.003	0.006	0.006	0.002	0.007
Xanthomonas citri	0	0	0.02	0	0	0	0	0	0.02	0.02	0	0	0	0	0	0	0.01	0	0	0	0	0.01	0.03	0.01	0	0	0	0	0	0	0.01	0	0	0	0	0	0.03	0.01	0	0	0	0	0.001	0.01	0.002	0.001	0.001	1e-05	0.01
Beggiatoa leptomitoformis	0	0	0.02	0	0	0	0	0	0.01	0.02	0	0	0	0	0	0	0.02	0	0	0	0	0	0.01	0.01	0	0	0	0	0	0	0.03	0	0	0	0	0	0.03	0.02	0	0	0	0	0.001	0.013	0.001	1e-05	0.001	1e-05	0.011
Echinicola rosea	0	0	0.02	0	0	0	0	0	0.01	0.02	0	0	0	0	0	0	0.02	0	0	0	0	0	0.02	0.01	0	0	0	0	0	0	0.02	0	0	0	0	0	0.03	0.01	0	0	0	0	0.004	0.01	0.001	0.004	0.004	0.002	0.01
Cronobacter sakazakii	0	0	0	0	0	0	0	0	0	0	0	0	0	0	0	0.01	0	0	0	0	0.14	0	0	0	0	0	0	0	0	0.01	0	0	0	0	0	0	0	0	0	0	0	0	0.002	0.005	0.001	0.001	0.002	0.001	0.005
Clostridium sp. JN-1	0.01	0	0.01	0.01	0	0	0	0.01	0	0	0	0	0	0.01	0	0	0	0.01	0	0.01	0.01	0.01	0	0	0	0	0	0.01	0.01	0	0	0	0	0	0.01	0	0	0.01	0.01	0.01	0	0.01	0.005	0.015	0.009	0.004	0.007	0.004	0.012
Streptococcus equi	0.01	0.01	0.01	0.01	0	0	0	0.01	0	0.01	0	0	0	0.01	0.01	0.01	0.01	0.01	0	0	0	0	0	0	0	0	0	0	0.01	0	0.01	0	0	0	0	0	0	0.01	0.01	0.01	0	0	0.003	0.011	0.006	0.002	0.004	0.003	0.01
Flavisolibacter tropicus	0.01	0	0.01	0	0	0	0	0	0.01	0.02	0	0.01	0	0	0	0	0.01	0	0	0	0	0.01	0.01	0.01	0	0	0	0	0.01	0	0.02	0	0.01	0	0	0	0.01	0.01	0	0	0	0	0.003	0.012	0.005	0.007	0.003	0.003	0.012
Acetobacterium woodii	0	0	0	0.01	0	0	0	0.01	0.01	0	0	0	0	0.01	0	0.01	0	0.01	0	0.01	0.01	0	0.01	0	0	0	0	0.01	0	0	0	0	0.01	0	0.01	0	0.01	0	0.01	0.01	0	0.01	0.006	0.013	0.008	0.003	0.008	0.003	0.013
Lactobacillus rhamnosus	0	0	0.01	0	0	0	0	0	0.01	0.01	0	0	0	0	0	0	0.01	0.01	0	0	0	0	0.01	0	0	0	0	0	0	0.06	0.01	0	0	0	0	0	0.02	0.01	0	0	0	0	0.004	0.008	0.002	0.002	0.003	0.002	0.008
Paenibacillus borealis	0	0	0.01	0	0	0	0	0.01	0.01	0.01	0	0	0	0.01	0	0.01	0.01	0	0	0	0	0.01	0.01	0	0	0	0	0.01	0.01	0	0.01	0	0	0	0.01	0.01	0.01	0.01	0	0	0	0	0.003	0.015	0.004	0.003	0.004	0.005	0.014
Paenibacillus riograndensis	0	0	0.01	0	0	0	0	0	0.01	0.01	0	0	0	0.01	0	0	0.01	0.01	0	0	0	0	0.01	0.01	0	0	0	0	0	0	0.01	0	0.01	0	0.01	0	0.02	0.01	0.01	0.01	0	0	0.006	0.012	0.005	0.004	0.006	0.004	0.012
Gemella haemolysans	0	0.01	0	0.01	0	0	0	0	0	0	0.01	0	0	0.01	0	0.01	0	0.02	0	0	0.01	0	0	0	0.01	0	0	0.01	0	0	0	0.01	0	0	0	0	0.01	0	0.02	0.01	0	0.01	0.003	0.006	0.012	0.002	0.003	0.003	0.005
Aquimarina sp. AD1	0	0	0.02	0	0	0	0	0	0.01	0.02	0	0	0	0	0	0	0.02	0	0	0	0	0	0.01	0.01	0	0	0	0	0	0	0.02	0	0	0	0	0	0.04	0.01	0	0	0	0	0.003	0.008	0.003	0.003	0.005	0.001	0.007
Sediminicola sp. YIK13	0	0	0.01	0	0	0	0	0	0.01	0.01	0	0.01	0	0	0	0	0.01	0	0	0	0	0	0.02	0.01	0	0	0	0	0	0	0.02	0	0.01	0	0	0	0.04	0.01	0	0	0	0	0.002	0.012	0.001	0.003	0.003	1e-05	0.011
Weeksella virosa	0	0	0.01	0	0	0	0	0	0.02	0.01	0	0	0	0	0	0	0.01	0	0	0	0	0	0.03	0.01	0	0	0	0	0	0	0.01	0	0	0	0	0	0.05	0.01	0	0	0	0	0.002	0.01	0.001	0.002	0.001	1e-05	0.01
Spirosoma aerolatum	0	0	0.01	0	0.01	0	0	0	0.01	0.02	0	0.01	0	0	0	0	0.01	0	0	0	0	0	0.01	0.01	0	0.01	0	0	0	0	0.02	0	0.01	0	0	0	0.02	0.01	0	0	0	0	0.004	0.028	0.002	0.004	0.004	0.001	0.025
Kluyvera intermedia	0	0	0	0	0	0	0	0	0	0	0	0	0	0	0	0.08	0	0	0	0	0	0	0	0	0	0	0	0	0	0.02	0	0	0	0	0	0	0.04	0	0	0	0.02	0	0.003	0.006	0.001	0.001	0.002	0.001	0.006
Ralstonia insidiosa	0	0	0.01	0	0.01	0	0	0	0.02	0.01	0	0	0	0.01	0	0	0.01	0	0	0	0.01	0	0.02	0	0	0	0	0	0	0	0.01	0.02	0	0	0	0	0.03	0	0	0	0	0	0.003	0.005	0.001	0.003	0.001	0.002	0.006
Capnocytophaga canimorsus	0	0	0.01	0	0.01	0.01	0	0	0.01	0.01	0	0.01	0	0	0	0	0.01	0	0.01	0	0	0	0.01	0.01	0	0.01	0	0	0	0	0.01	0	0.01	0	0	0	0.02	0.01	0	0	0	0	0.002	0.014	0.004	0.007	0.006	0.001	0.013
Spirosoma montaniterrae	0	0	0.01	0	0.01	0.01	0	0	0.01	0.01	0	0.01	0	0	0	0	0.01	0	0	0	0	0	0.01	0.01	0	0	0	0	0.01	0	0.01	0	0.01	0	0	0.01	0.02	0.01	0	0	0	0	0.003	0.018	0.003	0.003	0.004	0.001	0.019
Lactobacillus amylovorus	0.01	0	0.01	0	0	0	0	0	0.01	0.01	0	0	0	0	0	0	0.01	0	0	0	0	0.01	0.01	0.01	0	0	0	0	0.01	0	0.01	0	0	0	0	0	0.03	0.01	0.01	0	0	0	0.003	0.014	0.007	0.003	0.003	0.006	0.013
Bacillus oceanisediminis	0	0	0	0.01	0	0	0	0.01	0.01	0	0	0	0	0.01	0	0	0.01	0.01	0.01	0.01	0	0	0.01	0	0	0	0	0	0	0	0.01	0	0	0	0	0	0.02	0.01	0.01	0.01	0	0	0.007	0.006	0.006	0.002	0.007	0.003	0.006
Paenibacillus ihbetae	0	0	0.01	0.01	0	0	0	0	0.01	0.01	0	0	0	0	0	0	0.01	0.01	0	0	0	0	0.01	0.01	0	0	0	0	0.01	0	0.01	0	0	0	0	0	0.02	0.01	0.01	0.01	0	0	0.006	0.013	0.004	0.003	0.003	0.003	0.014
Staphylococcus condimenti	0	0	0	0	0	0	0	0	0	0	0	0	0	0	0	0	0	0	0	0	0	0	0	0	0	0	0	0	0.01	0.14	0	0	0	0	0	0	0	0	0	0	0	0	0.002	0.005	0.002	0.002	0.002	0.001	0.003
Mucilaginibacter gotjawali	0	0	0.02	0	0.01	0	0	0	0	0.02	0	0.01	0	0	0	0	0.02	0	0	0	0	0	0	0.01	0	0.01	0	0	0	0	0.03	0	0.01	0	0	0	0	0.01	0	0	0	0	0.003	0.014	0.003	0.006	0.01	0.002	0.015
Shewanella denitrificans	0	0	0.01	0	0	0	0	0	0.02	0.01	0	0	0	0	0	0	0.01	0	0	0	0	0	0.02	0.01	0	0	0	0	0	0	0.01	0	0	0	0	0	0.05	0.01	0	0	0	0	0.001	0.011	0.001	0.001	1e-05	0.001	0.01
Caloramator sp. E03	0.01	0	0	0.01	0	0	0	0.01	0	0	0.01	0	0	0.01	0	0	0	0.01	0	0	0.01	0.01	0	0	0	0.01	0	0.01	0.01	0	0	0	0	0.01	0	0	0	0.01	0.01	0.01	0	0	0.008	0.007	0.007	0.004	0.005	0.007	0.007
Acetoanaerobium sticklandii	0.01	0	0	0.01	0	0	0	0.01	0.01	0	0	0	0	0	0	0	0.01	0	0	0	0.01	0.01	0.01	0	0	0	0	0.01	0.01	0	0	0	0	0	0	0.01	0.02	0.01	0	0.01	0	0	0.006	0.01	0.006	0.002	0.003	0.004	0.008
Actinomyces naeslundii	0.01	0.01	0	0	0	0	0	0.01	0	0	0	0	0	0.01	0.03	0.01	0	0	0	0.01	0	0	0.01	0.01	0	0	0	0	0	0.01	0	0	0	0	0.01	0	0	0	0	0.01	0.01	0	1e-05	1e-05	0.004	0.001	1e-05	1e-05	1e-05
Helicobacter pylori	0.01	0	0.01	0	0	0	0	0.01	0.01	0.01	0	0	0	0	0	0	0.01	0.01	0	0	0	0.01	0.01	0	0	0	0	0	0.01	0	0.01	0	0	0	0	0	0.02	0.01	0.01	0	0	0	0.007	0.005	0.005	0.004	0.005	0.003	0.004
Ralstonia solanacearum	0.01	0	0.01	0	0	0	0	0.01	0	0.01	0	0	0.01	0	0.01	0.01	0.01	0	0	0.01	0	0.01	0	0.01	0	0	0	0	0.01	0	0.01	0	0	0	0	0.01	0	0.01	0	0	0	0	0.007	0.013	0.002	0.005	0.005	0.004	0.017
Selenomonas sp. oral taxon 920	0	0	0	0	0	0	0	0.01	0.01	0	0	0	0	0	0	0.01	0.01	0.01	0	0	0	0.01	0.01	0.01	0	0	0	0	0.01	0	0.01	0	0	0	0.01	0.01	0.01	0.01	0.01	0	0	0	0.006	0.023	0.004	0.004	0.006	0.004	0.04
Chryseobacterium camelliae	0	0	0.02	0	0	0	0	0	0.01	0.02	0	0.01	0	0	0	0	0.02	0	0	0	0	0	0.01	0.01	0	0	0	0	0	0	0.02	0	0	0	0	0	0.02	0.01	0	0	0	0	0.003	0.019	0.002	0.003	0.008	0.002	0.019
Chryseobacterium nakagawai	0	0	0.02	0	0	0	0	0	0.01	0.03	0	0.01	0	0	0	0	0.02	0	0	0	0	0	0.01	0.01	0	0	0	0	0	0	0.01	0	0	0	0	0	0.02	0.01	0	0	0	0	0.002	0.01	0.001	0.001	1e-05	0.001	0.009
Flavobacterium kingsejongi	0	0	0.01	0	0.01	0.01	0	0	0.01	0.01	0	0.01	0	0	0	0	0.01	0	0	0	0	0	0.01	0.01	0	0	0	0	0	0	0.01	0	0.01	0	0	0	0.03	0.01	0	0	0	0	0.004	0.014	0.002	0.003	0.007	0.002	0.014
Mariniflexile sp. TRM1-10	0	0	0.01	0	0.01	0.01	0	0	0.01	0.01	0	0.01	0	0	0	0	0.01	0	0.01	0	0	0	0.01	0	0	0.01	0	0	0.01	0	0.01	0	0.01	0	0	0	0.01	0.01	0	0	0	0	0.003	0.013	0.003	0.007	0.01	0.002	0.01
Muricauda ruestringensis	0	0	0.01	0	0	0	0	0	0.01	0.01	0	0.01	0	0	0	0	0.01	0	0	0	0	0	0.02	0.01	0	0	0	0	0	0	0.01	0	0.01	0	0	0	0.04	0.01	0	0	0	0	0.001	0.009	0.001	0.003	0.004	0.002	0.009
Antarcticibacterium flavum	0	0	0.01	0	0.01	0	0	0	0.01	0.01	0	0.01	0	0	0	0	0.01	0	0	0	0	0	0.01	0.01	0	0.01	0	0	0	0	0.02	0	0.01	0	0	0	0.02	0.01	0	0	0	0	0.003	0.021	0.001	0.003	0.007	0.002	0.019
Hymenobacter sp. 17J68-5	0	0	0.02	0	0.01	0	0.01	0	0	0.02	0	0.01	0	0	0	0	0.01	0	0	0	0	0	0	0.01	0	0.01	0	0	0	0	0.02	0	0.01	0	0	0	0.01	0.01	0	0	0	0	0.005	0.013	0.002	0.006	0.007	0.002	0.013
Pontibacter actiniarum	0	0	0.01	0	0.01	0.01	0	0	0.01	0.01	0	0	0	0	0	0	0.01	0	0	0	0	0	0.02	0	0	0	0	0	0	0	0.01	0	0.01	0	0	0	0.04	0.01	0	0	0	0	0.003	0.015	0.001	0.004	0.003	0.001	0.017
Aquiflexum balticum	0	0	0.01	0	0	0	0	0	0.01	0.01	0	0	0	0	0	0	0.01	0	0	0	0	0	0.02	0.01	0	0	0	0	0.01	0	0.01	0	0	0	0	0	0.04	0.01	0.01	0	0	0	0.003	0.016	0.003	0.006	0.003	0.003	0.016
Flammeovirga sp. MY04	0	0	0.01	0	0.01	0.01	0	0	0	0.01	0	0.02	0.01	0	0	0	0.01	0	0	0	0	0	0	0.01	0	0.01	0.01	0	0	0	0.01	0	0.01	0	0	0	0.01	0.01	0	0	0	0	0.005	0.021	0.004	0.008	0.022	0.002	0.02
Chitinophaga sp. MD30	0	0	0.01	0	0.01	0.01	0	0	0.01	0.01	0	0.01	0	0	0	0	0.01	0	0	0	0	0	0.01	0.01	0	0.01	0	0	0	0	0.01	0	0.01	0	0	0	0.02	0.01	0	0	0	0	0.003	0.016	0.001	0.006	0.007	0.001	0.017
Klebsiella oxytoca	0	0	0.01	0	0	0	0.01	0	0	0.01	0	0	0	0.01	0	0.04	0	0	0.01	0	0	0	0	0	0	0	0	0.01	0	0.01	0	0	0.01	0	0	0	0.01	0	0	0	0.01	0.01	0.024	0.003	0.003	0.003	0.005	0.005	0.003
Buchnera aphidicola	0	0	0.01	0.01	0	0	0	0	0.01	0.01	0	0	0	0	0	0	0.01	0	0	0	0	0.01	0.01	0.01	0	0	0	0.01	0.01	0	0.01	0	0	0	0	0	0.02	0.01	0.01	0	0	0	0.005	0.011	0.006	0.003	0.003	0.003	0.007
Aeromonas hydrophila	0	0	0.01	0	0.01	0.01	0.01	0.01	0	0.01	0	0.01	0	0	0	0	0.01	0.01	0	0	0.01	0.01	0	0.01	0	0.01	0	0	0	0	0.01	0	0	0	0	0	0	0.01	0	0	0	0	0.006	0.012	0.003	0.004	0.004	0.002	0.013
Azospirillum brasilense	0	0	0.01	0	0	0	0.01	0.01	0	0	0	0	0	0	0.01	0.01	0.01	0	0	0	0.01	0	0.01	0.01	0	0	0	0	0.01	0	0.01	0	0	0	0.01	0.01	0	0.01	0	0	0.01	0	0.009	0.01	0.005	0.004	0.004	0.005	0.014
Clostridium drakei	0.01	0	0.01	0	0	0	0	0.01	0.01	0.01	0	0	0	0	0	0	0.01	0	0	0	0	0	0.01	0.01	0	0	0	0.01	0	0	0.01	0	0	0	0	0	0.02	0.01	0	0.01	0	0	0.003	0.012	0.007	0.002	0.003	0.003	0.009
Paenibacillus xylanexedens	0	0	0.01	0.01	0	0	0	0	0.01	0.01	0	0	0	0.01	0	0	0.01	0.01	0	0	0	0	0.01	0.01	0	0	0	0	0	0	0.01	0	0	0	0	0	0.02	0.01	0.01	0	0	0	0.004	0.009	0.005	0.003	0.007	0.002	0.008
Chryseobacterium sp. StRB126	0	0	0.01	0	0	0	0	0	0.01	0.01	0	0.01	0	0	0	0	0.01	0	0	0.01	0	0	0.01	0	0	0	0	0	0.01	0	0.01	0	0.01	0	0	0	0.02	0	0.01	0.01	0	0	0.003	0.007	0.003	0.003	0.008	0.001	0.008
Elizabethkingia miricola	0	0	0.03	0	0	0	0	0	0.01	0.03	0	0	0	0	0	0	0.02	0	0	0	0	0	0.01	0.01	0	0	0	0	0	0	0.01	0	0	0	0	0	0.01	0.01	0	0	0	0	1e-05	0.004	0.001	0.001	1e-05	1e-05	0.003
Hymenobacter sp. PAMC 26554	0	0	0.01	0	0	0	0	0	0.01	0.01	0	0	0	0	0	0	0.01	0	0	0	0	0	0.01	0.01	0	0	0	0	0.01	0	0.02	0	0.01	0	0	0.01	0.02	0.01	0	0	0	0	0.002	0.016	0.001	0.004	0.003	0.001	0.018
Haliscomenobacter hydrossis	0	0	0.01	0	0	0	0	0	0.02	0.01	0	0	0	0	0	0	0.01	0	0	0	0	0	0.02	0	0	0	0	0	0	0	0.01	0	0.01	0	0	0	0.04	0.01	0	0	0	0	0.004	0.015	0.001	0.005	0.003	0.001	0.014
Escherichia sp. E4742	0	0	0.01	0	0	0	0.01	0	0.01	0.01	0	0	0	0.01	0	0	0.01	0	0	0	0	0	0.01	0	0	0	0	0.02	0	0	0.01	0	0.01	0	0	0	0.02	0.01	0	0	0	0	0.002	0.009	0.001	0.001	0.002	1e-05	0.007
Citrobacter werkmanii	0	0	0.01	0	0	0	0.02	0	0	0.01	0	0	0	0	0	0.04	0	0	0	0	0	0	0	0	0	0	0	0.02	0	0.02	0.01	0	0	0	0	0	0	0	0	0	0.01	0	0.006	0.001	0.001	0.001	0.001	0.001	0.001
Pluralibacter gergoviae	0	0	0.01	0	0	0	0	0	0.01	0.01	0	0	0	0	0	0.02	0.01	0	0	0	0	0	0.01	0	0	0	0	0.03	0	0	0.01	0	0	0	0	0	0.02	0.01	0	0	0	0	0.003	0.009	0.001	0.002	0.003	0.002	0.01
Geobacter sp. M18	0	0	0.01	0	0	0	0	0	0.01	0.02	0	0	0	0	0	0	0.01	0	0	0	0	0	0.02	0.01	0	0	0	0	0	0	0.02	0	0	0	0	0	0.03	0.01	0	0	0	0	0.005	0.008	0.002	0.002	0.003	0.001	0.01
Zymomonas mobilis	0	0	0.01	0	0.01	0	0	0	0.01	0.01	0	0.01	0	0	0	0	0.01	0	0	0	0	0	0.01	0.01	0	0	0	0	0.01	0	0.01	0	0	0	0	0	0.03	0.01	0	0	0	0	0.003	0.014	0.003	0.001	0.003	0.001	0.013
Asticcacaulis excentricus	0	0	0.01	0	0	0	0	0	0.01	0.02	0	0	0	0	0	0	0.01	0	0	0	0	0	0.02	0.01	0	0	0	0	0	0	0.02	0	0	0	0	0	0.03	0.01	0	0	0	0	0.003	0.015	0.002	0.003	0.005	0.001	0.017
Opitutaceae bacterium TAV5	0	0	0.01	0	0	0	0	0	0.01	0.02	0	0	0	0	0	0	0.01	0	0	0	0	0	0.01	0.01	0	0	0	0	0.01	0	0.02	0	0	0	0	0	0.03	0.01	0	0	0	0	0.005	0.017	0.001	0.002	0.002	0.001	0.017
Clostridium sp. JN500901	0.01	0	0.01	0.01	0	0	0	0.01	0	0	0	0	0	0.01	0	0	0.01	0	0	0.01	0.01	0.01	0	0	0	0.01	0	0.01	0.01	0	0	0	0	0	0	0	0	0.01	0	0.01	0	0	0.007	0.009	0.009	0.002	0.004	0.004	0.006
Alkaliphilus oremlandii	0.01	0	0.01	0	0	0	0	0.01	0	0.01	0	0	0	0.01	0	0	0.01	0.01	0	0	0.01	0.01	0	0	0	0	0	0.01	0.01	0	0	0	0	0	0	0	0	0.01	0.01	0.01	0	0	0.006	0.009	0.003	0.002	0.005	0.003	0.008
[Clostridium] ultunense	0.01	0	0.01	0.01	0	0	0	0.01	0	0	0.01	0	0	0.01	0	0	0.01	0.01	0	0.01	0	0	0	0	0	0	0	0.01	0.01	0	0	0	0	0	0	0	0	0.01	0.01	0.01	0	0	0.007	0.007	0.005	0.001	0.006	0.002	0.006
Prochlorococcus marinus	0.01	0	0.01	0	0	0	0	0.01	0	0.01	0	0.01	0	0	0	0	0.01	0	0	0	0	0.01	0	0.01	0	0.01	0	0	0.01	0	0.01	0	0	0	0	0.01	0	0.01	0	0.01	0	0	0.005	0.017	0.01	0.005	0.004	0.004	0.013
[Eubacterium] minutum	0	0	0.01	0.01	0	0	0	0	0	0	0	0	0	0.01	0	0	0.01	0.01	0	0.01	0	0.01	0	0	0.01	0	0	0	0.01	0	0.01	0	0	0.01	0	0	0.01	0.01	0.01	0	0	0	0.009	0.007	0.003	0.003	0.008	0.004	0.008
Heliobacterium modesticaldum	0	0	0.01	0.01	0	0	0	0.01	0	0.01	0	0	0	0	0.01	0	0.01	0.01	0	0	0	0	0	0.01	0	0.01	0	0	0	0	0.01	0	0	0	0.01	0	0	0.01	0.01	0.01	0	0	0.007	0.008	0.004	0.003	0.003	0.002	0.01
Gemella morbillorum	0	0.01	0	0.01	0	0	0	0	0	0	0.01	0	0	0.01	0	0.01	0	0.01	0	0	0.01	0	0	0	0	0	0	0.01	0	0	0	0.01	0	0	0.01	0	0.01	0	0.01	0.01	0	0.01	0.003	0.008	0.008	0.002	0.002	0.003	0.005
Flavobacterium johnsoniae	0	0	0	0	0.01	0	0.01	0	0	0	0	0.01	0	0.01	0	0	0.01	0.01	0.01	0	0.01	0	0	0	0	0.01	0	0	0	0	0.01	0	0.01	0	0.01	0	0	0.01	0.01	0	0	0	0.005	0.013	0.005	0.006	0.008	0.002	0.012
Flavobacterium sediminis	0	0	0.02	0	0.01	0.01	0	0	0	0.02	0	0.01	0	0	0	0	0.01	0	0.01	0	0	0	0	0.01	0	0.01	0	0	0	0	0.01	0	0.01	0	0	0	0	0.01	0	0	0	0	0.002	0.006	0.002	0.004	0.005	0.002	0.006
Runella sp. HYN0085	0	0	0.01	0	0.01	0.01	0	0	0.01	0.01	0	0.01	0	0	0	0	0.01	0	0	0	0	0	0.01	0	0	0.01	0	0	0	0	0.01	0	0.01	0	0	0	0.02	0.01	0	0	0	0	0.004	0.021	0.001	0.004	0.009	0.002	0.02
Echinicola sp. LN3S3	0	0	0.01	0	0.01	0.01	0.01	0	0	0.01	0	0.01	0.01	0	0	0	0.01	0	0	0	0	0	0	0.01	0	0.01	0.01	0	0	0	0.01	0	0.01	0	0	0	0	0.01	0	0	0	0	0.004	0.01	0.003	0.007	0.017	0.002	0.009
Sphingobacterium sp. G1-14	0	0	0.02	0	0.01	0.01	0	0	0.01	0.02	0	0.01	0	0	0	0	0.01	0	0	0	0	0	0	0.01	0	0.01	0	0	0	0	0.01	0	0	0	0	0	0.01	0.01	0	0	0	0	1e-05	0.005	0.001	0.002	0.006	0.001	0.004
Flavisolibacter sp. 17J28-1	0	0	0.01	0	0.01	0	0	0	0.01	0.01	0	0.01	0	0	0	0	0.01	0	0	0	0	0	0.01	0.01	0	0.01	0	0	0	0	0.01	0	0.01	0	0	0	0.02	0.01	0	0	0	0	0.003	0.019	0.002	0.006	0.005	0.003	0.02
Shigella dysenteriae	0	0	0.01	0	0	0	0.02	0	0	0.02	0	0	0	0.04	0	0	0	0	0	0	0	0	0	0	0	0	0	0.02	0	0	0.01	0	0.02	0	0	0	0	0	0	0	0	0	0.002	0.001	0.001	0.001	0.002	1e-05	0.001
Desulfobacter postgatei	0	0	0.01	0	0	0	0	0	0.01	0.01	0	0	0	0.01	0	0	0.01	0	0	0	0	0	0.01	0.01	0	0	0	0.01	0	0	0.01	0	0	0.01	0	0	0.01	0.01	0	0.01	0.01	0	0.003	0.007	0.004	0.002	0.004	0.001	0.007
Lactobacillus johnsonii	0.01	0	0.01	0.01	0	0	0	0.01	0	0	0	0	0	0.01	0	0	0.01	0	0	0	0	0.01	0	0	0	0	0	0.01	0.01	0.02	0	0	0	0	0	0	0	0.01	0	0.01	0	0	0.005	0.009	0.009	0.002	0.004	0.004	0.007
Bacillus litoralis	0.01	0	0	0.01	0	0	0	0.01	0.01	0	0	0	0	0.01	0	0	0	0.01	0	0	0	0.01	0.01	0	0	0	0	0.01	0.01	0	0	0	0	0	0	0	0.02	0	0.01	0	0	0	0.005	0.008	0.009	0.003	0.005	0.005	0.006
Staphylococcus epidermidis	0.01	0	0	0	0	0	0	0.01	0.01	0	0	0	0	0	0	0	0	0.01	0	0	0	0.01	0.01	0	0	0	0	0.01	0.01	0.03	0	0	0	0	0	0	0.02	0	0	0	0	0	0.004	0.009	0.005	0.002	0.006	0.002	0.006
Actinomyces pacaensis	0	0.01	0	0	0	0	0	0	0.01	0	0	0	0	0	0	0.01	0	0.01	0	0.01	0	0	0	0	0	0	0	0	0	0.01	0	0	0	0	0.01	0.01	0.01	0	0	0.02	0.01	0.01	0.001	0.004	0.013	0.001	0.005	0.004	0.004
Flavobacterium sp. GS03	0	0	0.01	0	0	0	0	0	0.01	0.01	0	0.01	0	0	0	0	0.01	0	0	0	0	0	0.01	0.01	0	0	0	0	0.01	0	0.01	0	0	0	0	0	0.03	0.01	0	0	0	0	0.001	0.015	0.002	0.002	0.003	0.001	0.014
Flavobacterium sp. CJ74	0	0	0.01	0	0	0	0	0	0.01	0.02	0	0	0	0	0	0	0.01	0	0	0	0	0	0.01	0	0	0	0	0.01	0	0	0.02	0	0.01	0	0	0	0.02	0.01	0	0	0	0	0.002	0.011	0.002	0.004	0.006	0.002	0.011
Flavobacterium arcticum	0	0	0.01	0	0.01	0	0	0	0.01	0.01	0	0.01	0	0	0	0	0.01	0	0	0	0	0	0.01	0	0	0.01	0	0	0	0	0.01	0	0.01	0	0	0	0.02	0.01	0	0	0	0	0.001	0.006	0.004	0.002	0.002	1e-05	0.006
Spirosoma rigui	0	0	0.01	0	0.01	0	0	0	0.01	0.01	0	0.01	0	0	0	0	0.01	0	0	0	0	0	0.01	0	0	0.01	0	0	0	0	0.01	0	0.01	0	0	0	0.02	0.01	0	0	0	0	0.004	0.006	0.002	0.004	0.006	0.001	0.007
Fibrella sp. ES10-3-2-2	0	0	0.01	0	0.01	0	0	0	0.01	0.01	0	0.01	0	0	0	0	0.01	0	0	0	0	0	0.01	0	0	0.01	0	0	0	0	0.01	0	0.01	0	0	0	0.02	0.01	0	0	0	0	0.003	0.012	0.001	0.004	0.005	0.002	0.013
Chitinophaga caeni	0	0	0.01	0	0.01	0	0	0	0.01	0.01	0	0.01	0	0	0	0	0.01	0	0	0	0	0	0.01	0.01	0	0	0	0	0	0	0.01	0	0.01	0	0	0	0.02	0.01	0	0	0	0	0.004	0.011	0.002	0.006	0.008	0.002	0.011
Citrobacter sp. FDAARGOS_156	0	0	0	0	0	0	0	0	0	0	0	0	0	0	0	0.13	0	0	0	0	0	0	0	0	0	0	0	0	0	0	0	0	0	0	0	0	0	0	0	0	0	0	0.002	1e-05	1e-05	1e-05	1e-05	1e-05	1e-05
Pseudomonas entomophila	0	0	0.02	0	0	0	0	0	0.01	0.02	0	0	0	0	0	0	0.02	0	0	0	0	0	0.01	0.01	0	0	0	0	0	0	0.02	0	0	0	0	0	0.01	0.01	0	0	0	0	0.002	0.017	0.001	0.002	0.001	0.001	0.018
Cystobacter fuscus	0	0	0.01	0	0	0	0	0	0.01	0.01	0	0	0	0	0	0	0.01	0	0	0	0	0	0.01	0.01	0	0	0	0	0.01	0	0.02	0	0	0	0	0	0.03	0.01	0	0	0	0	0.004	0.013	0.001	0.003	0.005	0.002	0.015
Rhizobium etli	0	0	0.01	0	0	0	0	0	0.01	0.01	0	0	0	0	0	0	0.01	0.01	0	0	0	0	0.02	0.01	0	0	0	0	0	0	0.01	0	0	0	0	0	0.03	0.01	0	0	0	0	0.004	0.007	0.002	0.002	0.002	0.002	0.008
Azoarcus communis	0	0	0.01	0	0	0	0	0	0.02	0.01	0	0	0	0	0	0	0.01	0	0	0	0	0	0.02	0.01	0	0	0	0	0	0	0.01	0	0	0	0	0	0.03	0.01	0	0	0	0	0.005	0.013	0.002	0.003	0.003	0.001	0.014
Solibacillus silvestris	0.01	0	0.01	0.01	0	0	0	0	0	0.01	0	0	0	0.01	0	0	0.01	0.01	0.01	0.01	0	0.01	0	0	0	0	0	0	0	0	0.01	0	0	0	0	0	0	0	0.01	0.01	0	0	0.003	0.005	0.004	0.002	0.003	0.002	0.004
Desulfotomaculum ruminis	0	0	0.01	0.01	0	0	0	0.01	0	0.01	0	0	0	0	0	0	0.01	0.01	0	0	0	0	0	0.01	0	0	0	0	0.01	0	0.01	0	0	0	0	0.01	0	0.01	0.01	0.01	0	0	0.006	0.009	0.003	0.004	0.004	0.002	0.01
Bacillus amyloliquefaciens	0	0	0.01	0.01	0	0	0	0	0.01	0.01	0.01	0	0	0	0	0.01	0.01	0.01	0.01	0.01	0	0	0.01	0.01	0.01	0	0	0	0	0	0	0	0	0	0	0	0	0	0	0	0	0	0.002	0.003	0.001	0.001	0.002	0.001	0.003
Paenibacillus sp. FSL R7-0331	0	0	0.01	0.01	0	0	0	0	0	0	0	0	0	0.01	0	0	0.01	0	0.01	0.01	0	0	0	0.01	0	0	0	0.01	0.01	0	0.01	0	0	0	0	0	0	0.01	0.01	0.01	0	0	0.007	0.01	0.006	0.004	0.009	0.004	0.01
Saccharibacillus sp. ATSA2	0	0	0	0.01	0	0	0	0.01	0	0	0	0	0	0	0.01	0	0.01	0.01	0	0	0	0.01	0	0.01	0	0	0	0	0.01	0	0	0	0.01	0	0	0.01	0	0.01	0.01	0.01	0	0	0.012	0.009	0.006	0.004	0.006	0.004	0.012
Streptomyces pratensis	0	0	0.02	0	0	0	0	0	0.02	0.02	0	0	0	0	0	0	0.01	0	0	0	0	0	0.02	0.01	0	0	0	0	0	0	0.01	0	0	0	0	0	0.02	0	0	0	0	0	1e-05	0.005	1e-05	1e-05	1e-05	1e-05	0.006
Chryseobacterium sp. G0186	0	0	0.01	0	0.01	0	0	0	0.01	0.01	0	0.01	0	0	0	0	0.01	0	0	0	0	0	0.01	0.01	0	0.01	0	0	0	0	0.01	0	0.01	0	0	0	0.01	0.01	0	0	0	0	0.001	0.006	0.003	0.003	0.002	0.001	0.005
Flavobacterium magnum	0	0	0.01	0	0.01	0	0	0	0.01	0.01	0	0.01	0	0	0	0	0.01	0	0	0	0	0	0.01	0.01	0	0.01	0	0	0	0	0.01	0	0.01	0	0	0	0.01	0.01	0	0	0	0	0.002	0.008	0.001	0.005	0.004	0.002	0.009
Euzebyella marina	0	0	0.01	0	0.01	0	0	0	0.01	0.01	0	0.01	0	0	0	0	0.01	0	0	0	0	0	0.01	0.01	0	0.01	0	0	0	0	0.01	0	0.01	0	0	0	0.01	0.01	0	0	0	0	0.001	0.014	0.001	0.004	0.005	0.001	0.015
Pedobacter sp. G11	0	0	0.01	0	0.01	0.01	0.01	0	0	0.01	0	0.01	0	0	0	0	0.01	0	0	0	0.01	0	0	0	0	0.01	0	0	0	0	0.01	0	0.01	0	0	0	0.01	0.01	0	0	0	0	0.004	0.01	0.004	0.003	0.008	0.001	0.01
Shewanella putrefaciens	0	0	0.02	0	0	0	0	0	0.01	0.02	0	0.01	0	0	0	0	0.01	0	0	0	0	0	0.01	0.01	0	0.01	0	0	0	0	0.01	0	0	0	0	0	0.01	0.01	0	0	0	0	0.001	0.009	0.001	0.001	0.004	1e-05	0.007
Dehalobacter sp. CF	0.01	0	0	0.01	0	0	0	0.01	0	0	0.01	0	0	0.01	0.01	0.01	0	0.02	0.01	0.01	0	0.01	0	0	0	0	0	0	0	0	0	0	0	0	0	0	0	0	0	0	0	0	0.001	0.001	0.001	1e-05	0.001	1e-05	0.001
Paenibacillus sp. FSL H7-0737	0	0	0.01	0.01	0	0	0	0	0.01	0.01	0	0	0	0.01	0	0	0.01	0	0	0.01	0	0	0.01	0	0	0	0	0	0	0	0.01	0	0	0	0	0	0.02	0	0.01	0	0	0	0.006	0.01	0.005	0.003	0.006	0.004	0.009
Gardnerella vaginalis	0	0	0.01	0	0	0	0	0	0.01	0.01	0	0	0	0	0	0	0.01	0.01	0	0	0	0	0.01	0	0	0	0	0	0	0	0.01	0	0.01	0	0	0	0.02	0.01	0.01	0	0	0	0.005	0.006	0.004	0.001	0.003	0.004	0.005
Actinomyces viscosus	0	0.01	0	0	0	0	0	0	0	0	0	0	0	0	0.02	0.01	0	0	0	0.01	0	0	0.01	0	0	0	0	0	0	0.01	0	0	0	0	0.02	0	0	0	0	0.01	0.01	0.01	1e-05	0.001	0.002	0.001	0.001	1e-05	0.001
Chryseobacterium sp. IHB B 17019	0	0	0	0	0.01	0	0	0	0.01	0.01	0	0.01	0	0	0	0	0	0.01	0	0	0	0	0.01	0	0	0.01	0	0	0	0	0.01	0	0.01	0	0	0	0.02	0.01	0	0	0	0	0.004	0.014	0.002	0.004	0.006	0.001	0.011
Chryseobacterium sp. G0162	0	0	0.01	0	0	0	0	0	0.02	0.01	0	0.01	0	0	0	0	0.01	0	0	0	0	0	0.02	0	0	0	0	0	0	0	0.01	0	0	0	0	0	0.03	0	0	0	0	0	0.002	0.01	0.001	0.002	0.001	1e-05	0.009
Flavobacterium indicum	0	0	0.01	0	0	0	0	0	0.01	0.01	0	0.01	0	0	0	0	0.01	0	0	0	0	0	0.01	0.01	0	0	0	0	0	0	0.01	0	0	0	0	0	0.03	0.01	0	0	0	0	0.003	0.014	0.004	0.004	0.002	0.001	0.011
Arcticibacterium luteifluviistationis	0	0	0.01	0	0	0	0.01	0	0.01	0.01	0	0.01	0	0	0	0	0.01	0	0	0	0.01	0	0.01	0	0	0	0	0	0	0	0.01	0	0	0	0	0	0.02	0.01	0	0	0	0	0.002	0.008	0.003	0.004	0.003	0.001	0.007
Belliella baltica	0	0	0.01	0	0	0	0	0	0.01	0.01	0	0.01	0	0	0	0	0.01	0	0	0	0	0	0.01	0	0	0	0	0	0	0	0.01	0	0.01	0	0	0	0.03	0.01	0	0	0	0	0.004	0.01	0.002	0.002	0.003	1e-05	0.009
Pseudomonas sp. TMW 2.1634	0	0	0.02	0	0	0	0	0	0.02	0.02	0	0	0	0	0	0	0.02	0	0	0	0	0	0.02	0.01	0	0	0	0	0	0	0	0	0	0	0	0	0.01	0	0	0	0	0	1e-05	0.005	1e-05	1e-05	1e-05	1e-05	0.005
Pseudodesulfovibrio aespoeensis	0	0	0.01	0	0	0	0	0	0.01	0.01	0	0	0	0	0	0	0.01	0	0	0	0	0.01	0.01	0.01	0	0	0	0	0.01	0	0.01	0	0	0	0	0	0.02	0.01	0	0	0	0	0.004	0.01	0.002	0.002	0.002	0.001	0.011
Burkholderia sp. KJ006	0	0	0.01	0	0	0	0	0	0.01	0.01	0.01	0	0	0	0	0	0.01	0.01	0	0	0	0.01	0.02	0.01	0	0	0	0	0	0	0.01	0	0	0	0	0	0.01	0	0	0	0	0	1e-05	0.002	1e-05	1e-05	1e-05	1e-05	0.002
Desulfosporosinus orientis	0.01	0	0	0.01	0	0	0	0.01	0	0	0	0	0	0.01	0.01	0	0	0.01	0	0	0	0.01	0	0	0	0	0	0.01	0.01	0	0	0	0	0	0	0	0	0.01	0.01	0.01	0	0	0.008	0.008	0.006	0.004	0.005	0.004	0.008
Jeotgalibacillus malaysiensis	0.01	0	0.01	0	0	0	0	0.01	0	0.01	0	0	0	0.01	0	0	0.01	0.01	0	0	0	0.01	0	0	0	0	0	0.01	0	0	0.01	0	0	0	0	0	0	0.01	0.01	0	0	0	0.006	0.008	0.006	0.003	0.007	0.004	0.007
Desulfitobacterium dehalogenans	0	0	0.01	0.01	0	0	0	0.01	0	0.01	0	0	0	0	0	0	0.01	0.01	0	0	0	0.01	0	0	0	0	0	0	0.01	0	0.01	0	0	0	0	0	0	0.01	0.01	0.01	0	0	0.004	0.005	0.006	0.003	0.006	0.002	0.006
Paenibacillaceae bacterium GAS479	0	0	0.01	0.01	0	0	0	0	0	0.01	0	0	0	0.01	0	0	0.01	0	0	0.01	0	0	0	0.01	0	0	0	0.01	0	0	0.01	0	0	0	0	0	0	0.01	0.01	0.01	0	0	0.006	0.006	0.005	0.004	0.005	0.003	0.006
Bifidobacterium scardovii	0	0.01	0	0.01	0	0	0	0	0.01	0	0.01	0	0	0	0.01	0.01	0	0.01	0	0.01	0	0	0.01	0	0	0	0	0	0	0	0	0	0	0.01	0	0	0	0	0	0.01	0.01	0	0.005	0.007	0.006	0.003	0.005	0.004	0.009
Chryseobacterium haifense	0	0	0.01	0	0.01	0	0	0	0	0.01	0	0.01	0	0	0	0	0.01	0	0	0	0	0	0.01	0.01	0	0.01	0	0	0	0	0.01	0	0.01	0	0	0	0.01	0.01	0	0	0	0	0.002	0.008	0.002	0.003	0.007	1e-05	0.007
Elizabethkingia meningoseptica	0	0	0.01	0	0.01	0.01	0.01	0	0	0.01	0	0.01	0	0	0	0	0.01	0	0	0	0.01	0	0	0	0	0.01	0	0	0	0	0.01	0	0.01	0	0	0	0	0.01	0	0	0	0	0.003	0.01	0.003	0.007	0.008	0.003	0.008
Lutibacter sp. LPB0138	0	0	0.01	0	0.01	0.01	0	0	0	0.02	0	0.01	0	0	0	0	0.01	0	0	0	0	0	0	0.01	0	0.01	0	0	0	0	0.01	0	0.01	0	0	0	0	0.01	0	0	0	0	0.003	0.005	0.005	0.003	0.003	0.001	0.006
Myroides sp. A21	0	0	0.02	0	0	0	0	0	0.01	0.02	0	0	0	0	0	0	0.02	0	0	0	0	0	0.01	0.01	0	0	0	0	0	0	0.01	0	0	0	0	0	0.01	0.01	0	0	0	0	1e-05	0.003	1e-05	1e-05	1e-05	1e-05	0.003
Serratia plymuthica	0	0	0.01	0	0	0	0	0	0.01	0.01	0	0	0	0	0	0	0.01	0	0	0.01	0	0	0.01	0.01	0	0	0	0	0.01	0	0.01	0	0	0	0	0	0.01	0.01	0.01	0	0	0	0.004	0.004	0.003	0.003	0.003	0.001	0.004
Shewanella marisflavi	0	0	0.01	0	0	0	0	0	0.01	0.01	0	0	0	0	0	0	0.01	0	0	0	0	0	0.02	0	0	0	0	0	0	0	0.01	0	0	0	0	0	0.04	0.01	0	0	0	0	0.002	0.008	0.001	0.002	0.002	0.001	0.007
Geobacter uraniireducens	0	0	0.01	0	0	0	0	0	0.01	0.01	0	0	0	0	0	0	0.01	0	0	0	0	0	0.02	0.01	0	0	0	0	0	0	0.01	0	0	0	0	0	0.03	0.01	0	0	0	0	0.002	0.025	0.002	0.002	0.003	0.001	0.022
Brevundimonas sp. DS20	0	0	0.01	0	0	0	0	0	0.01	0.01	0	0	0	0	0	0	0.01	0	0	0	0	0	0.02	0.01	0	0	0	0	0	0	0.01	0	0	0	0	0	0.03	0.01	0	0	0	0	0.001	0.009	0.001	0.001	0.001	1e-05	0.009
Sediminispirochaeta smaragdinae	0	0	0.01	0	0.01	0	0	0	0.01	0.01	0	0	0	0	0	0	0.01	0	0.01	0	0	0	0.01	0.01	0	0	0	0	0	0	0.01	0	0	0	0	0	0.01	0.01	0	0.01	0	0	0.005	0.006	0.007	0.003	0.018	0.002	0.005
Kosakonia cowanii	0	0	0	0	0	0	0	0	0.01	0.01	0	0	0	0	0	0.01	0.01	0.01	0	0	0	0	0.01	0	0	0	0	0	0	0	0.01	0	0	0	0	0	0.04	0	0	0	0	0	0.003	0.004	0.001	0.001	0.001	0.001	0.004
Lactobacillus allii	0.01	0	0.01	0	0	0	0	0	0.01	0.01	0	0	0	0	0	0	0.01	0	0	0	0	0	0.01	0	0	0	0	0	0.01	0	0.01	0	0	0	0	0	0.02	0.01	0	0	0	0	0.002	0.01	0.004	1e-05	0.002	0.003	0.009
Enterococcus mundtii	0.01	0	0	0	0	0	0.01	0.01	0	0	0	0.01	0	0.01	0	0	0	0	0	0	0	0.01	0	0	0	0	0	0.01	0.01	0.03	0	0	0	0	0	0	0	0	0	0	0	0	0.005	0.005	0.006	0.005	0.005	0.003	0.004
Mycobacteroides chelonae	0.01	0	0	0	0	0	0	0.01	0	0.01	0	0.01	0	0	0.01	0	0.01	0.01	0.01	0	0	0.01	0	0.01	0	0.01	0	0	0	0	0	0	0	0	0	0	0	0	0	0	0	0	1e-05	0.001	1e-05	1e-05	1e-05	1e-05	0.001
Methylomusa anaerophila	0	0	0.01	0	0	0	0	0	0	0.01	0	0	0	0.01	0	0	0.01	0.01	0	0	0	0.01	0	0	0	0	0	0	0.01	0	0.01	0	0	0	0	0	0	0.01	0.01	0.01	0	0	0.008	0.011	0.005	0.003	0.002	0.002	0.011
Streptococcus sobrinus	0	0	0.01	0	0	0	0	0	0.01	0.01	0	0	0	0	0	0	0.01	0.01	0	0	0	0	0.01	0	0	0	0	0	0	0	0.01	0	0	0	0	0	0.02	0	0.01	0.01	0	0	0.003	0.002	0.004	0.001	0.001	0.001	0.002
Lactobacillus sanfranciscensis	0	0	0	0	0	0	0	0	0	0	0	0	0	0	0	0	0	0	0	0	0	0	0	0	0	0	0	0	0	0	0	0	0	0	0.11	0	0	0	0	0	0	0	0.001	0.002	0.001	1e-05	0.001	0.001	0.002
Enterococcus sp. FDAARGOS_553	0	0	0.02	0.01	0	0	0.01	0	0	0.01	0	0	0	0.01	0	0	0.01	0.01	0	0	0	0	0	0.01	0	0	0	0	0	0.01	0.01	0	0	0	0	0	0	0	0	0	0	0	1e-05	0.001	0.001	0.002	0.001	0.001	0.001
Paraliobacillus sp. X-1125	0	0	0.01	0.01	0	0	0	0.01	0	0	0	0	0	0	0	0	0.01	0.01	0	0	0	0.01	0	0	0	0	0	0.01	0.01	0	0.01	0	0	0	0	0	0	0	0.01	0.01	0	0	0.002	0.011	0.006	0.002	0.002	0.003	0.009
Paenibacillus sp. DCT19	0	0	0	0.01	0	0	0	0.01	0.01	0	0	0	0	0.01	0	0	0	0.01	0	0	0	0.01	0.01	0	0	0	0	0	0	0	0	0	0	0	0	0	0.02	0	0.01	0.01	0	0	0.005	0.009	0.008	0.004	0.005	0.004	0.008
Paenibacillus graminis	0	0	0.01	0.01	0	0	0	0.01	0	0.01	0	0	0	0	0	0	0.01	0.01	0	0	0	0.01	0	0	0	0	0	0	0	0	0.01	0	0	0	0	0	0.01	0.01	0.01	0	0	0	0.008	0.007	0.004	0.003	0.006	0.003	0.008
Soehngenia sp. W6	0	0	0.01	0	0	0	0	0	0.01	0	0	0	0	0.01	0	0	0.01	0.01	0	0	0	0	0.01	0	0	0	0	0	0	0	0.01	0	0	0	0	0	0.02	0.01	0	0.01	0	0	0.005	0.006	0.004	0.003	0.006	0.003	0.006
Kitasatospora sp. MMS16-BH015	0	0	0.01	0	0	0	0	0	0.01	0.01	0	0	0	0	0	0	0.01	0.01	0	0	0	0	0.01	0.01	0	0	0	0	0	0	0.01	0	0	0	0	0	0.02	0.01	0	0	0	0	0.004	0.004	0.001	0.002	0.001	0.001	0.004
Chryseobacterium sp. H6466	0	0	0.03	0	0	0	0	0.01	0	0.03	0	0	0	0	0	0	0.02	0	0	0	0	0	0	0.01	0	0	0	0	0	0	0.01	0	0	0	0	0	0	0	0	0	0	0	0.002	0.004	0.001	0.001	1e-05	1e-05	0.004
Flavobacterium gilvum	0	0	0.01	0	0.01	0.01	0	0	0	0.01	0	0.01	0	0	0	0	0.01	0	0	0	0	0	0	0.01	0	0.01	0	0	0	0	0.01	0	0.01	0	0	0	0	0.01	0	0	0	0	0.003	0.014	0.005	0.007	0.009	0.002	0.012
Flavobacterium crocinum	0	0	0.01	0	0.01	0	0	0	0	0.01	0	0.01	0	0	0	0	0.01	0	0	0	0.01	0	0	0	0	0.01	0	0.01	0	0	0.01	0	0.01	0	0	0	0	0.01	0	0	0	0	0.004	0.007	0.004	0.008	0.002	0.004	0.006
Flavobacteriaceae bacterium 10Alg115	0	0	0	0	0.01	0.01	0.01	0	0	0.01	0	0.01	0	0	0	0	0.01	0.01	0	0	0.01	0	0	0	0	0	0	0	0	0	0.01	0	0.01	0	0	0	0	0.01	0	0	0	0	0.005	0.009	0.003	0.006	0.009	0.002	0.008
Maribacter cobaltidurans	0	0	0.01	0	0	0	0	0	0.01	0.02	0	0	0	0	0	0	0.01	0	0	0	0	0	0.01	0.01	0	0	0	0	0	0	0.01	0	0	0	0	0	0.02	0.01	0	0	0	0	0.002	0.013	0.002	0.002	0.004	0.002	0.013
Wenyingzhuangia fucanilytica	0	0	0.01	0	0	0	0	0	0.01	0.01	0	0	0	0	0	0	0.01	0	0	0	0	0	0.02	0	0	0	0	0	0.01	0	0.01	0	0	0	0	0	0.03	0	0	0	0	0	0.002	0.013	0.003	0.003	0.009	0.002	0.012
Flavivirga eckloniae	0	0	0.01	0	0.01	0	0	0	0	0.01	0	0.01	0	0	0	0	0.01	0	0	0	0	0	0.01	0	0	0.01	0	0	0	0	0.01	0	0.01	0	0	0	0.01	0.01	0	0	0	0	0.004	0.007	0.004	0.007	0.002	0.001	0.006
Fibrella aestuarina	0	0	0.01	0	0.01	0	0.01	0	0	0.01	0	0.01	0	0	0	0	0.01	0	0	0	0	0	0	0.01	0	0.01	0	0	0	0	0.01	0	0.01	0	0	0	0	0.01	0	0	0	0	0.005	0.018	0.002	0.004	0.006	0.003	0.02
Leadbetterella byssophila	0	0	0.01	0	0.01	0	0	0	0.01	0.01	0	0.01	0	0	0	0	0	0	0	0	0	0	0.01	0	0	0.01	0	0	0	0	0.01	0	0.01	0	0	0	0.02	0	0	0	0	0	0.002	0.012	0.005	0.01	0.006	0.002	0.012
Marivirga tractuosa	0	0	0.01	0	0	0	0	0	0.01	0.02	0	0.01	0	0	0	0	0.01	0	0	0	0	0	0.01	0	0	0	0	0	0	0	0.01	0	0	0	0	0	0.02	0.01	0	0	0	0	0.002	0.011	0.003	0.001	0.002	0.001	0.01
Pedobacter cryoconitis	0	0	0.01	0	0.01	0	0	0	0	0.01	0	0.01	0	0	0	0	0.01	0	0	0	0	0	0	0	0	0.01	0	0	0	0	0.01	0	0.01	0	0	0	0.01	0.01	0.01	0	0	0	0.003	0.006	0.004	0.004	0.007	0.003	0.005
Mucilaginibacter paludis	0	0	0.01	0	0.01	0.01	0	0	0	0.01	0	0.01	0	0	0	0	0.01	0	0	0	0	0	0	0.01	0	0.01	0	0	0	0	0.01	0	0.01	0	0	0	0	0.01	0	0	0	0	0.005	0.019	0.003	0.006	0.008	0.002	0.017
Chlorobaculum parvum	0	0	0.01	0	0	0	0	0	0.01	0.02	0	0	0	0	0	0	0.01	0	0	0	0	0	0.01	0.01	0	0	0	0	0	0	0.01	0	0	0	0	0	0.02	0.01	0	0	0	0	0.002	0.006	0.002	0.001	0.001	0.001	0.007
Fibrobacter succinogenes	0	0	0.01	0.01	0	0	0	0	0	0.01	0	0	0	0	0	0	0.01	0.01	0	0	0	0	0	0.01	0	0	0	0	0.01	0	0.01	0	0	0	0	0	0	0.01	0.01	0.01	0	0	0.004	0.019	0.004	0.003	0.007	0.003	0.019
Enterobacter asburiae	0	0	0.01	0	0	0	0	0	0	0.01	0.01	0.02	0	0.01	0	0.02	0	0	0	0	0	0	0.01	0	0	0	0	0	0	0.01	0	0	0	0	0	0	0	0	0	0	0.01	0	0.003	0.005	0.003	0.108	0.004	0.002	0.006
Citrobacter freundii complex sp. CFNIH9	0	0	0	0	0	0	0	0	0	0	0	0	0	0	0	0.05	0	0	0	0	0	0	0	0	0	0	0	0	0	0.04	0	0	0	0	0	0	0	0	0	0	0.02	0	0.008	1e-05	1e-05	1e-05	1e-05	1e-05	1e-05
Candidatus Hamiltonella defensa	0	0	0.01	0	0.01	0	0	0	0.01	0.01	0	0	0	0	0	0	0	0	0	0	0	0	0.01	0	0	0.01	0	0	0	0	0.01	0	0	0	0	0	0.03	0.01	0	0	0	0	0.001	0.008	0.001	0.001	0.001	0.001	0.006
Sinorhizobium fredii	0	0	0.01	0	0	0	0	0.01	0	0.01	0	0	0	0	0	0.01	0.01	0	0	0	0	0.01	0.01	0.01	0	0	0	0	0.01	0	0.01	0	0	0	0	0	0	0.01	0	0	0	0	0.009	0.008	0.002	0.004	0.005	0.004	0.01
Xanthobacter autotrophicus	0	0	0.01	0	0	0	0	0	0.01	0.02	0	0	0	0	0	0	0.01	0	0	0	0	0	0.01	0.01	0	0	0	0	0	0	0.01	0	0	0	0	0	0.02	0.01	0	0	0	0	0.002	0.005	0.001	0.001	0.001	0.001	0.007
Pseudovibrio sp. FO-BEG1	0	0	0.01	0	0	0	0	0	0.01	0.01	0	0	0	0	0	0	0.01	0	0	0	0	0	0.02	0	0	0	0	0	0	0	0.01	0	0	0	0	0	0.03	0.01	0	0	0	0	0.001	0.006	0.002	0.002	0.004	0.002	0.007
Nitrosomonas eutropha	0	0	0.01	0	0	0	0	0	0.01	0.01	0	0	0	0	0	0	0.01	0	0	0	0	0	0.02	0.01	0	0	0	0	0	0	0.01	0	0	0	0	0	0.02	0.01	0	0	0	0	0.001	0.007	0.001	0.001	1e-05	0.001	0.007
Treponema brennaborense	0	0	0.01	0	0	0	0	0	0	0.01	0	0	0	0.01	0	0	0.01	0	0	0	0	0	0.01	0.01	0	0	0	0	0	0	0.01	0	0.01	0	0	0	0.01	0.01	0.01	0	0	0	0.008	0.006	0.004	0.004	0.003	0.002	0.006
Sphaerochaeta pleomorpha	0	0	0.01	0	0	0	0	0	0.01	0.01	0	0	0	0.01	0	0	0.01	0	0	0	0	0	0.01	0	0	0	0	0	0	0	0.01	0	0	0	0.01	0	0.02	0.01	0	0	0	0	0.003	0.008	0.003	0.002	0.003	0.003	0.008
Leuconostoc citreum	0	0	0	0	0	0	0	0	0	0	0	0	0	0	0	0	0	0.01	0	0	0	0.04	0	0	0	0	0	0	0	0	0	0	0	0	0.05	0	0	0	0	0	0	0	0.001	0.001	0.006	0.002	0.001	0.001	0.001
Paenibacillus sp. M-152	0	0	0.01	0	0	0	0	0	0.01	0.01	0	0	0	0	0	0	0.01	0	0	0	0	0.01	0.01	0.01	0.01	0	0	0	0	0	0	0	0	0	0	0	0.02	0	0	0	0	0	1e-05	0.005	0.001	1e-05	1e-05	0.001	0.004
Kocuria palustris	0	0	0	0	0	0	0	0	0	0	0	0	0	0	0	0	0	0	0	0.1	0	0	0	0	0	0	0	0	0	0	0	0	0	0	0	0	0	0	0	0	0	0	0.002	0.015	1e-05	0.001	0.001	1e-05	0.007
Propionibacterium freudenreichii	0	0	0.01	0	0	0	0	0	0.01	0.01	0	0	0	0	0	0	0.01	0	0	0	0	0	0.01	0.01	0	0	0	0	0	0	0.01	0	0	0	0	0	0.02	0.01	0	0	0	0	0.003	0.01	0.001	0.001	0.001	0.001	0.011
Chryseobacterium arthrosphaerae	0	0	0.01	0	0	0	0	0	0.01	0.02	0	0	0	0	0	0	0.01	0	0	0	0	0	0.01	0	0	0	0	0	0	0	0.01	0	0	0	0	0	0.02	0.01	0	0	0	0	0.002	0.008	0.002	0.004	0.006	0.002	0.008
Nonlabens spongiae	0	0	0.01	0	0	0	0	0	0.01	0.01	0	0	0	0	0	0	0.01	0	0	0	0	0	0.01	0.01	0	0	0	0	0	0	0.01	0	0	0	0	0	0.02	0.01	0	0	0	0	0.001	0.015	0.001	0.003	0.001	0.001	0.012
Flagellimonas sp. HME9304	0	0	0.01	0	0	0	0	0	0.01	0.01	0	0.01	0	0	0	0	0.01	0	0	0	0	0	0.01	0	0	0	0	0	0	0	0.01	0	0	0	0	0	0.02	0.01	0	0	0	0	0.001	0.004	0.002	0.004	0.002	1e-05	0.004
Runella sp. SP2	0	0	0.01	0	0	0	0	0	0.01	0.01	0	0	0	0	0	0	0.01	0	0	0	0	0	0.01	0.01	0	0	0	0	0	0	0.01	0	0	0	0	0	0.02	0.01	0	0	0	0	0.003	0.01	0.003	0.004	0.007	0.003	0.009
Geobacter daltonii	0	0	0.01	0	0	0	0	0	0.01	0.01	0	0	0	0	0	0	0.01	0	0	0	0	0	0.01	0.01	0	0	0	0	0	0	0.01	0	0	0	0	0	0.02	0.01	0	0	0	0	0.003	0.015	0.001	0.001	0.002	0.001	0.015
Burkholderia cepacia	0	0	0	0	0	0	0.01	0.01	0.01	0	0.01	0	0	0	0	0.01	0	0.01	0	0	0.01	0	0.02	0	0	0	0	0	0	0	0	0	0	0	0	0	0.01	0	0	0	0	0	0.006	0.004	0.002	0.003	0.002	0.001	0.005
Rubrivivax gelatinosus	0	0	0.01	0	0	0	0	0	0.01	0.01	0	0	0	0	0	0	0.01	0	0	0	0	0	0.01	0.01	0	0	0	0	0	0	0.01	0	0	0	0	0	0.02	0.01	0	0	0	0	0.005	0.009	0.002	0.003	0.001	0.001	0.012
Desulfosporosinus meridiei	0.01	0	0.01	0	0	0	0	0.01	0	0	0	0	0	0.01	0	0	0	0	0	0	0	0.01	0	0	0	0	0	0.01	0.01	0	0.01	0	0	0	0	0	0	0.01	0	0.01	0	0	0.004	0.007	0.003	0.003	0.007	0.004	0.007
Anoxybacillus flavithermus	0.01	0	0	0.01	0	0	0	0.01	0	0	0.01	0	0	0.01	0	0	0	0.01	0.01	0.01	0	0.01	0	0	0	0	0	0.01	0	0	0	0	0	0	0	0	0	0	0	0	0	0	0.001	0.002	0.003	0.001	0.002	0.002	0.002
Fictibacillus arsenicus	0.01	0	0	0.01	0	0	0	0.01	0	0	0	0	0	0.01	0	0	0	0.01	0	0.01	0	0.01	0	0	0	0	0	0	0.01	0	0	0	0	0	0	0	0	0	0.01	0.01	0	0	0.006	0.006	0.006	0.003	0.005	0.003	0.006
Lactobacillus delbrueckii	0	0	0	0.01	0.01	0	0	0.01	0	0	0	0	0	0.01	0	0	0	0.01	0	0	0	0	0	0	0	0	0	0.01	0.01	0	0	0	0	0	0	0.01	0	0	0.01	0.01	0	0	0.006	0.009	0.005	0.003	0.008	0.003	0.008
Salimicrobium jeotgali	0	0	0.01	0	0	0	0	0	0	0.01	0	0	0	0	0	0	0.01	0.01	0	0	0	0	0.01	0	0	0	0	0	0	0	0.01	0	0	0	0	0	0.01	0.01	0.01	0.01	0	0	0.003	0.006	0.002	0.001	0.003	0.002	0.007
Paenibacillus stellifer	0	0	0	0	0.01	0	0	0	0	0	0	0.01	0	0.01	0	0	0	0	0	0	0	0	0	0	0	0.01	0	0.01	0	0	0	0	0.01	0	0.01	0	0	0.01	0	0.01	0	0.01	0.004	0.005	0.006	0.003	0.009	0.003	0.007
Paenibacillus sp. 32O-W	0	0	0.01	0.01	0	0	0	0	0	0.01	0	0	0	0	0	0	0.01	0	0	0	0	0	0	0.01	0	0	0	0	0.01	0	0.01	0	0	0	0	0	0	0.01	0.01	0.01	0	0	0.006	0.006	0.005	0.003	0.008	0.002	0.009
Paenibacillus sp. MBLB1234	0	0	0.01	0	0	0	0	0	0	0.02	0	0	0	0.01	0	0	0.01	0.01	0	0	0	0	0	0.01	0	0	0	0	0	0	0.01	0	0	0	0	0	0	0.01	0.01	0	0	0	0.006	0.005	0.005	0.004	0.003	0.003	0.005
Planococcus sp. Y42	0	0	0.01	0	0	0	0	0	0.01	0.01	0	0	0	0	0	0	0.01	0	0	0	0	0	0.01	0	0	0	0	0	0	0	0.01	0	0	0	0	0	0.02	0.01	0	0.01	0	0	0.003	0.009	0.003	0.003	0.003	0.002	0.009
Peptoniphilus ivorii	0	0	0.01	0	0	0	0	0.01	0.01	0.01	0	0	0	0	0	0	0.01	0	0	0	0	0	0.01	0.01	0	0	0	0	0	0	0.01	0	0	0	0	0	0.01	0.01	0	0	0	0	0.005	0.006	0.003	0.002	0.003	0.003	0.008
Trueperella pyogenes	0	0	0	0.01	0	0	0	0	0	0	0.01	0	0	0	0	0	0	0.01	0	0.03	0	0	0	0	0	0	0	0	0	0	0	0	0	0.02	0	0	0	0	0.01	0	0.01	0	0.005	0.003	0.003	0.001	0.003	0.001	0.004
Saccharomonospora sp. 31sw	0	0	0.01	0	0	0	0	0	0.01	0.01	0	0	0	0	0	0	0.01	0	0	0	0	0	0.02	0	0	0	0	0	0	0	0.01	0	0	0	0	0	0.02	0.01	0	0	0	0	0.001	0.009	0.001	0.002	0.001	0.001	0.01
Kutzneria albida	0	0	0.01	0	0	0	0.01	0	0	0.01	0	0	0	0	0	0	0.01	0	0	0	0.01	0	0	0.01	0	0	0	0	0	0	0.01	0	0	0	0.01	0	0	0.01	0	0	0.01	0	0.007	0.004	0.004	0.002	0.003	0.002	0.005
Chryseobacterium bernardetii	0	0	0.01	0	0.01	0	0	0	0.01	0.01	0	0.01	0	0	0	0	0.01	0	0	0	0	0	0.01	0	0.01	0	0	0	0	0	0	0	0	0	0	0	0.01	0	0.01	0	0	0	0.004	0.005	0.003	0.005	0.003	0.004	0.005
Flavobacterium sp. GS13	0	0	0.01	0	0.01	0	0	0	0	0.01	0	0.01	0	0	0	0	0.01	0	0	0	0	0	0	0	0	0.01	0	0	0.01	0	0.01	0	0.01	0	0	0	0	0.01	0	0	0	0	0.005	0.013	0.004	0.005	0.006	0.003	0.011
Capnocytophaga leadbetteri	0	0	0.01	0	0	0	0	0	0.01	0.02	0	0	0	0	0	0	0.01	0	0	0	0	0	0.01	0.01	0	0	0	0	0	0	0.01	0	0	0	0	0	0.01	0.01	0	0	0	0	0.002	0.013	0.001	0.004	0.003	0.002	0.012
Zobellia galactanivorans	0	0	0.01	0	0.01	0	0.01	0	0	0.01	0	0.01	0	0	0	0	0.01	0	0	0	0	0	0	0.01	0	0	0	0	0	0	0.01	0	0.01	0	0	0	0	0.01	0	0	0	0	0.003	0.009	0.004	0.006	0.004	0.001	0.008
Tamlana sp. UJ94	0	0	0.01	0	0	0.01	0	0	0	0.01	0	0.01	0	0	0	0	0.01	0	0	0	0	0	0	0.01	0	0	0	0	0	0	0.01	0	0.01	0	0	0	0.01	0.01	0	0	0	0	0.003	0.004	0.002	0.003	0.011	0.002	0.003
Mucilaginibacter sp. PAMC 26640	0	0	0.02	0	0	0	0	0	0	0.02	0	0	0	0	0	0	0.01	0	0	0	0	0	0	0.01	0	0	0	0	0	0	0.02	0	0	0	0	0	0.01	0.01	0	0	0	0	0.004	0.025	0.003	0.003	0.005	0.002	0.025
Enterobacteriaceae bacterium strain FGI 57	0	0	0	0	0	0	0.05	0	0	0	0	0	0	0	0	0.03	0	0	0	0	0	0	0	0	0	0	0	0	0	0	0	0	0	0	0	0	0.01	0	0	0	0.01	0	0.007	0.001	0.001	0.001	0.001	0.001	0.001
Pseudoalteromonas luteoviolacea	0	0	0.01	0	0	0	0	0	0.01	0.01	0	0	0	0	0	0	0.01	0	0	0	0	0	0.01	0	0	0	0	0	0	0	0.01	0	0	0	0	0	0.03	0.01	0	0	0	0	0.002	0.004	0.001	0.002	0.002	0.001	0.003
Vibrio vulnificus	0	0	0.01	0	0	0	0	0	0	0.01	0	0	0	0.01	0	0	0.01	0.01	0	0.01	0	0	0	0	0	0	0	0.01	0	0	0.01	0	0	0	0	0	0	0	0.01	0.01	0	0	0.005	0.007	0.004	0.004	0.006	0.004	0.007
Photobacterium gaetbulicola	0	0	0.01	0	0	0	0	0	0.01	0.01	0	0	0	0	0	0	0.01	0	0	0	0	0	0.01	0	0	0	0	0	0	0	0.01	0	0	0	0	0	0.03	0.01	0	0	0	0	0.001	0.008	0.001	0.001	0.001	0.001	0.009
Desulfotalea psychrophila	0	0	0.01	0	0	0	0	0	0.01	0.01	0	0	0	0	0	0	0.01	0	0	0	0	0	0.01	0	0	0	0	0	0	0	0.01	0	0	0	0	0	0.03	0.01	0	0	0	0	0.001	0.013	0.001	0.001	0.001	1e-05	0.013
Bradyrhizobium ottawaense	0	0	0.01	0	0	0	0	0	0.01	0.02	0	0	0	0	0	0	0.01	0	0	0	0	0	0.02	0.01	0	0	0	0	0	0	0.01	0	0	0	0	0	0.01	0	0	0	0	0	0.003	0.005	1e-05	0.001	0.001	1e-05	0.005
Paracoccus aminovorans	0	0	0.01	0	0	0	0	0	0.01	0.01	0	0	0	0	0	0	0.01	0	0	0	0	0	0.02	0	0	0	0	0	0	0	0.01	0	0	0	0	0	0.02	0.01	0	0	0	0	0.002	0.009	0.002	0.001	0.001	0.001	0.01
Burkholderia cenocepacia	0	0	0.01	0	0.01	0	0	0	0	0.01	0	0.01	0	0	0	0	0.01	0	0.01	0	0	0.01	0.01	0.01	0	0.01	0	0	0	0	0	0	0	0	0	0	0	0	0	0	0	0	0.005	0.003	0.003	0.003	0.001	0.001	0.005
Melaminivora sp. SC2-9	0	0	0.01	0	0	0	0	0	0	0.01	0	0	0	0	0	0	0	0.01	0	0	0	0	0	0	0.01	0	0	0	0	0	0	0.02	0	0.01	0	0	0.01	0	0.02	0	0	0	0.003	0.004	0.001	0.002	0.001	1e-05	0.005
Citrobacter sp. 86	0	0	0	0	0	0	0.01	0	0	0.02	0.01	0.01	0.01	0.02	0	0.01	0	0	0	0.01	0	0	0	0	0	0	0	0	0	0	0	0	0	0	0	0	0	0	0	0	0	0	1e-05	1e-05	1e-05	1e-05	1e-05	1e-05	1e-05
Salegentibacter sp. T436	0	0	0.01	0	0.02	0	0	0	0	0.01	0	0.02	0	0	0	0	0.01	0	0.01	0	0	0	0	0	0	0.01	0	0	0	0	0	0	0.01	0	0	0	0	0	0	0	0	0	0.002	0.003	0.003	0.006	0.001	0.002	0.004
Bacillus pseudomycoides	0.01	0	0	0	0	0	0	0.01	0	0	0	0	0	0	0	0	0	0.01	0	0.01	0	0.01	0	0	0	0	0	0	0.01	0	0	0	0.01	0	0	0	0	0	0.01	0.01	0	0	0.006	0.008	0.01	0.003	0.004	0.005	0.006
Coriobacterium glomerans	0.01	0	0	0	0	0	0	0.01	0	0	0	0	0	0	0.01	0	0	0	0	0.01	0	0.01	0	0	0	0	0	0	0.01	0	0	0	0	0	0	0.01	0	0	0	0.01	0.01	0	0.007	0.007	0.003	0.008	0.003	0.001	0.008
Peptostreptococcaceae bacterium oral taxon 929	0	0	0.01	0	0	0	0	0	0	0.01	0	0	0	0.01	0	0	0.01	0.01	0	0	0	0	0	0	0	0	0	0	0	0	0.01	0.01	0	0	0	0	0	0.01	0	0.01	0	0	0.003	0.011	0.007	0.002	0.003	0.004	0.008
Dehalobacter restrictus	0	0	0.01	0	0	0	0	0	0.01	0.01	0	0	0	0	0	0	0.01	0	0	0	0	0	0.01	0	0	0	0	0	0	0	0.01	0	0	0	0	0	0.01	0.01	0	0.01	0	0	0.004	0.009	0.007	0.002	0.003	0.001	0.009
Thermoanaerobacter kivui	0	0	0.01	0	0	0	0	0	0.01	0.01	0	0	0	0	0	0	0.01	0	0	0	0	0	0.01	0.01	0	0	0	0	0	0	0.01	0	0	0	0	0	0.01	0.01	0	0	0	0	0.002	0.005	0.003	0.001	0.002	0.001	0.004
Mahella australiensis	0	0	0	0.01	0	0	0	0.01	0	0	0	0	0	0.01	0	0	0	0.01	0	0.01	0	0.01	0	0	0	0	0	0	0.01	0	0	0	0	0	0	0	0	0	0.01	0.01	0	0	0.008	0.006	0.003	0.002	0.004	0.001	0.005
Bacillus mycoides	0	0	0.01	0	0	0	0	0	0.01	0.01	0	0	0	0	0	0	0.01	0	0	0	0	0	0.02	0	0	0	0	0	0	0	0.01	0	0	0	0	0	0.02	0	0	0	0	0	0.003	0.005	0.004	0.002	0.002	0.001	0.004
Bacillus infantis	0	0	0	0.01	0	0	0	0.01	0	0	0	0	0	0.01	0	0	0.01	0.01	0	0.01	0	0	0	0	0	0	0	0.01	0	0	0	0	0	0	0	0	0	0	0.01	0.01	0	0	0.005	0.008	0.005	0.003	0.006	0.004	0.009
Bacillus sp. FJAT-18017	0	0	0.01	0	0	0	0	0.01	0	0	0	0	0	0.01	0	0	0	0.01	0	0.01	0	0	0	0	0	0	0	0.01	0.01	0	0	0	0	0	0	0	0	0.01	0.01	0	0	0	0.006	0.007	0.006	0.003	0.004	0.003	0.006
Bacillus thermoamylovorans	0	0	0	0.01	0	0	0	0	0	0	0	0.01	0	0.01	0	0	0	0.01	0	0	0	0	0	0	0.01	0	0	0.01	0	0	0	0.01	0	0	0	0	0	0	0.01	0.01	0	0	0.003	0.008	0.006	0.004	0.003	0.005	0.007
Virgibacillus sp. SK37	0	0	0.01	0	0	0	0	0	0.01	0.01	0	0	0	0.01	0	0	0.01	0	0	0	0	0	0.01	0	0	0	0	0	0	0	0.01	0	0	0	0	0	0.01	0.01	0	0	0	0	0.001	0.008	0.002	0.001	0.002	0.002	0.006
Paenibacillus naphthalenovorans	0	0	0.01	0	0	0	0	0	0	0.01	0	0.01	0	0	0	0	0.01	0.01	0	0	0	0	0	0	0	0	0	0	0	0	0.01	0	0.01	0	0	0	0	0.01	0.01	0	0	0	0.008	0.006	0.007	0.005	0.008	0.002	0.006
Paenibacillus thiaminolyticus	0	0	0	0	0	0	0	0	0.01	0	0	0	0	0	0	0	0	0	0	0	0	0	0.01	0.01	0	0	0	0	0.01	0	0.01	0	0	0	0	0	0.02	0.01	0	0.01	0	0	0.008	0.007	0.007	0.006	0.004	0.003	0.008
Salinicoccus halodurans	0	0	0.01	0	0	0	0	0	0	0.01	0	0	0	0.01	0	0	0.01	0.01	0	0	0	0	0	0	0	0	0	0.01	0	0	0.01	0	0	0	0	0	0	0.01	0.01	0	0	0	0.004	0.009	0.003	0.002	0.003	0.002	0.009
Rummeliibacillus stabekisii	0	0	0.01	0	0	0	0	0	0.01	0.01	0	0	0	0	0	0	0.01	0.01	0	0	0	0	0.01	0	0	0	0	0	0	0	0.01	0	0	0	0	0	0.01	0	0.01	0	0	0	0.003	0.005	0.003	0.001	0.004	0.001	0.004
Anaerococcus mediterraneensis	0	0	0.01	0	0	0	0	0	0.01	0.01	0	0	0	0	0	0	0.01	0	0	0	0	0	0.01	0	0	0	0	0	0	0	0.01	0	0	0	0	0	0.02	0.01	0	0	0	0	0.002	0.012	0.005	0.002	0.005	0.002	0.01
Corynebacterium casei	0	0	0.02	0	0.01	0	0	0	0	0.02	0	0.01	0	0	0	0	0.01	0	0	0	0.01	0	0	0	0	0.01	0	0	0	0	0	0	0	0	0	0	0	0	0	0	0	0	0.001	0.001	0.001	0.001	0.003	1e-05	0.001
Rhodococcus sp. WB1	0	0	0.02	0	0	0	0	0	0.01	0.02	0	0	0	0	0	0	0.01	0	0	0	0	0	0.01	0.01	0	0	0	0	0	0	0	0	0	0	0	0	0.01	0	0	0	0	0	1e-05	0.003	1e-05	1e-05	1e-05	1e-05	0.003
Kocuria indica	0	0	0.01	0	0	0	0	0	0.01	0.01	0	0	0	0	0	0	0	0	0	0	0	0	0.02	0	0	0	0	0	0	0	0.01	0	0	0	0	0	0.03	0	0	0	0	0	0.001	0.013	0.002	0.001	0.001	0.001	0.01
Calothrix parasitica	0	0	0.02	0	0	0	0	0	0	0.03	0	0	0	0	0	0	0.01	0	0	0	0	0	0	0	0	0	0	0	0	0	0.02	0	0	0	0	0	0	0.01	0	0	0	0	0.003	0.005	0.004	0.003	0.003	0.003	0.004
Moorea producens	0	0	0.01	0	0	0	0	0	0	0.01	0	0	0	0	0	0	0.01	0.01	0	0	0	0	0	0	0	0	0	0	0.01	0	0.01	0	0	0	0	0	0.01	0.01	0.01	0	0	0	0.003	0.007	0.003	0.003	0.002	0.001	0.007
Chryseobacterium sp. G0201	0	0	0.01	0	0.01	0	0	0	0	0.01	0	0.01	0	0	0	0	0.01	0	0	0	0	0	0	0	0	0.01	0	0	0	0	0.01	0	0.01	0	0	0	0	0.01	0	0	0	0	0.003	0.016	0.002	0.003	0.004	0.001	0.014
Chryseobacterium balustinum	0	0	0.01	0	0	0	0	0	0	0.01	0	0.01	0	0	0	0	0.01	0	0	0	0	0	0.01	0.01	0	0	0	0	0	0	0.01	0	0	0	0	0	0.01	0.01	0	0	0	0	0.004	0.009	0.003	0.002	0.005	0.001	0.009
Flavobacterium faecale	0	0	0	0	0.01	0	0	0	0.01	0	0	0.01	0	0	0	0	0	0	0	0	0	0	0.01	0	0	0.01	0	0	0.01	0	0	0	0.01	0	0	0	0.02	0	0	0	0	0	0.004	0.004	0.004	0.005	0.002	0.002	0.004
Flavobacterium sp. HYN0086	0	0	0.01	0	0.01	0	0	0	0	0.01	0	0.01	0	0	0	0	0.01	0	0	0	0	0	0	0	0	0.01	0	0	0	0	0.01	0	0.01	0	0	0	0	0.01	0	0	0	0	0.001	0.008	0.004	0.005	0.007	0.001	0.007
Polaribacter sp. KT25b	0	0	0.01	0	0	0	0	0	0.01	0.01	0	0	0	0	0	0	0.01	0	0	0	0	0	0.01	0	0	0	0	0	0	0	0.01	0	0	0	0	0	0.02	0.01	0	0	0	0	0.002	0.007	0.003	0.001	0.001	0.002	0.006
Polaribacter sp. SA4-12	0	0	0.01	0	0	0	0	0	0	0.01	0	0	0	0	0	0	0.01	0	0	0	0	0	0.01	0	0	0	0	0	0.01	0	0.01	0	0	0	0	0	0.01	0.01	0	0.01	0	0	0.003	0.006	0.004	0.002	0.004	0.003	0.005
Tenacibaculum sp. DSM 106434	0	0	0.01	0	0	0	0	0	0.01	0.01	0	0	0	0	0	0	0.01	0	0	0	0	0	0.01	0.01	0	0	0	0	0	0	0.01	0	0	0	0	0	0.01	0.01	0	0	0	0	0.001	0.005	0.001	0.002	0.004	0.001	0.004
Maribacter sp. MJ134	0	0	0.01	0	0	0	0	0	0.01	0.01	0	0	0	0	0	0	0.01	0	0	0	0	0	0.01	0	0	0	0	0	0	0	0.01	0	0	0	0	0	0.02	0.01	0	0	0	0	0.002	0.013	0.002	0.004	0.004	0.003	0.01
Gramella forsetii	0	0	0	0	0.01	0	0	0	0.01	0	0	0.01	0	0	0	0	0.01	0	0	0	0	0	0.01	0	0	0.01	0	0	0	0	0	0	0.01	0	0	0	0.01	0.01	0	0	0	0	0.003	0.013	0.001	0.002	0.008	1e-05	0.012
Gramella salexigens	0	0	0.01	0	0.01	0	0	0	0	0.01	0	0.01	0	0	0	0	0.01	0	0	0	0	0	0	0	0	0.01	0	0	0	0	0.01	0	0.01	0	0	0	0.01	0	0	0	0	0	0.003	0.008	0.001	0.003	0.006	1e-05	0.007
Nonlabens sp. Hel1_33_55	0	0	0.01	0	0	0	0	0	0	0.02	0	0	0	0	0	0	0.01	0	0	0	0	0	0	0.01	0	0	0	0	0	0	0.02	0	0	0	0	0	0.01	0.01	0	0	0	0	0.001	0.007	0.001	0.003	0.001	1e-05	0.006
Aequorivita sp. H23M31	0	0	0.01	0	0	0	0	0	0.01	0.01	0	0	0	0	0	0	0.01	0	0	0	0	0	0.01	0	0	0	0	0	0	0	0.01	0	0	0	0	0	0.02	0.01	0	0	0	0	0.001	0.008	0.001	0.002	0.004	0.002	0.008
Algibacter alginicilyticus	0	0	0.01	0	0.01	0	0	0	0	0.01	0	0.01	0	0	0	0	0.01	0	0	0	0	0	0	0	0	0	0	0	0	0	0.01	0	0.01	0	0	0	0.01	0.01	0	0	0	0	0.004	0.004	0.004	0.004	0.004	0.002	0.003
Hymenobacter sp. PAMC 26628	0	0	0.02	0	0	0	0	0	0	0.02	0	0	0	0	0	0	0.01	0	0	0	0	0	0	0.01	0	0	0	0	0	0	0.02	0	0	0	0	0	0	0.01	0	0	0	0	0.004	0.011	0.002	0.004	0.002	0.001	0.012
Hymenobacter sp. DG25A	0	0	0.01	0	0	0	0	0	0.01	0.01	0	0	0	0	0	0	0.01	0	0	0	0	0	0.01	0.01	0	0	0	0	0	0	0.01	0	0	0	0	0	0.01	0.01	0	0	0	0	0.002	0.009	0.002	0.002	0.002	1e-05	0.01
Algoriphagus machipongonensis	0	0	0.01	0	0.01	0	0	0	0	0.01	0	0.01	0	0	0	0	0.01	0	0	0	0	0	0	0	0	0	0	0	0	0	0.01	0	0.01	0	0	0	0.01	0.01	0	0	0	0	0.004	0.008	0.001	0.003	0.006	0.001	0.008
Candidatus Amoebophilus asiaticus	0	0	0.01	0	0	0	0	0	0.01	0.01	0	0	0	0	0	0	0.01	0	0	0	0	0	0.01	0	0	0	0	0	0	0	0.01	0	0	0	0	0	0.02	0.01	0	0	0	0	0.001	0.005	0.001	0.001	0.001	0.001	0.005
Sphingobacterium psychroaquaticum	0	0	0.01	0	0.01	0.01	0	0	0	0.01	0	0.01	0	0	0	0	0.01	0	0	0	0	0	0	0	0	0.01	0	0	0	0	0.01	0	0.01	0	0	0	0	0	0	0	0	0	0.003	0.009	0.002	0.004	0.004	0.002	0.008
Niabella ginsenosidivorans	0	0	0.01	0	0	0	0	0	0	0.01	0	0	0	0	0	0	0.01	0	0	0	0	0	0	0.01	0	0	0	0	0.01	0	0.02	0	0.01	0	0	0	0	0.01	0	0	0	0	0.005	0.014	0.004	0.006	0.003	0.002	0.015
Rhodothermus marinus	0	0	0.01	0	0	0	0	0	0	0.01	0	0	0	0	0	0	0.01	0	0	0	0	0	0	0.01	0	0	0	0	0.01	0	0.01	0	0.01	0	0	0.01	0	0.01	0	0	0	0	0.005	0.006	0.001	0.003	0.006	0.002	0.008
Chlorobium chlorochromatii	0	0	0.01	0	0	0	0	0	0.01	0.01	0	0	0	0	0	0	0	0	0	0	0	0	0.01	0	0	0	0	0	0	0	0.01	0	0	0	0	0	0.04	0	0	0	0	0	0.001	0.008	0.001	1e-05	1e-05	1e-05	0.008
Enterobacter cloacae complex sp.	0	0	0.01	0	0	0	0	0	0.01	0.01	0	0	0	0	0	0.01	0	0	0	0	0	0	0.03	0	0	0	0	0	0	0	0	0	0	0	0	0	0.02	0	0	0	0	0	0.002	0.004	0.001	0.008	0.002	0.001	0.004
Mannheimia haemolytica	0	0	0.01	0	0	0	0	0	0.01	0.01	0	0	0	0	0	0	0.01	0	0	0	0	0	0.01	0.01	0	0	0	0	0	0	0.01	0	0	0	0	0	0.01	0.01	0	0	0	0	0.003	0.009	0.002	0.001	0.002	0.002	0.007
Pseudomonas mendocina	0	0	0.01	0	0	0	0	0	0	0.01	0	0	0	0	0	0.01	0.01	0	0	0	0.01	0	0	0.01	0	0	0	0	0	0	0.01	0	0	0	0.01	0	0	0.01	0	0	0	0	0.008	0.006	0.003	0.004	0.005	0.003	0.007
Wenzhouxiangella marina	0	0	0.01	0	0	0	0	0	0.01	0.01	0	0	0	0	0	0	0.01	0	0	0	0	0	0.01	0	0	0	0	0	0	0	0.01	0	0	0	0	0	0.02	0.01	0	0	0	0	0.002	0.005	1e-05	0.001	0.002	1e-05	0.006
Sulfurimonas gotlandica	0	0	0.01	0	0	0	0	0	0.01	0.01	0	0	0	0	0	0	0.01	0	0	0	0	0	0.01	0	0	0	0	0	0	0	0.01	0	0	0	0	0	0.02	0.01	0	0	0	0	0.002	0.011	0.002	0.002	0.005	0.001	0.009
Burkholderia pseudomallei	0	0	0.02	0	0	0	0	0	0	0.01	0	0.01	0	0	0	0	0.02	0.01	0	0	0	0	0	0.02	0	0	0	0	0	0	0	0	0	0	0	0	0	0	0	0	0	0	0.003	0.002	0.001	0.001	0.002	0.001	0.003
Alicycliphilus denitrificans	0	0	0.01	0	0	0	0	0	0	0.01	0	0	0	0	0	0	0.01	0.01	0	0	0	0.01	0	0.01	0	0	0	0	0	0	0.01	0	0	0	0	0	0.02	0	0	0	0	0	0.002	0.003	0.001	0.002	0.002	0.001	0.004
Bordetella petrii	0	0	0.01	0	0	0	0	0	0.01	0	0.01	0	0	0	0	0	0	0.02	0	0	0	0	0.01	0.01	0.01	0	0	0	0	0	0	0	0	0	0	0	0.01	0	0	0	0	0	0.002	0.006	0.001	0.002	0.002	0.001	0.007
Treponema primitia	0	0	0	0.01	0	0	0	0	0	0	0	0.01	0	0	0	0	0	0.01	0.01	0	0	0	0	0	0	0.01	0	0	0	0	0	0	0.01	0	0	0	0	0.01	0.01	0.01	0	0	0.004	0.008	0.004	0.002	0.008	0.002	0.008
Vibrio natriegens	0	0	0.01	0	0	0	0	0	0.01	0.01	0	0	0	0	0	0	0.01	0	0	0	0	0	0.02	0.01	0	0	0	0	0	0	0.01	0	0	0	0	0	0.01	0	0	0	0	0	0.002	0.002	0.001	1e-05	1e-05	1e-05	0.002
Clostridium cochlearium	0.01	0	0	0	0	0	0	0.01	0	0	0	0	0	0	0	0	0	0.01	0	0	0	0	0	0	0	0	0	0.01	0.01	0	0	0	0	0	0	0	0.02	0	0	0.01	0	0	0.003	0.012	0.007	0.002	0.004	0.004	0.009
Tepidanaerobacter acetatoxydans	0.01	0	0	0	0	0	0	0.01	0	0	0	0	0	0.01	0	0	0	0.01	0	0.01	0	0	0	0	0	0	0	0.01	0	0	0	0	0	0	0	0	0	0	0.01	0.01	0	0	0.004	0.009	0.005	0.003	0.005	0.004	0.01
Staphylococcus pseudintermedius	0.01	0	0	0.01	0	0	0	0.01	0	0	0.01	0	0	0.01	0	0	0.01	0.01	0	0	0	0	0	0	0	0	0	0	0	0.01	0	0	0	0	0	0	0	0	0	0	0	0	0.002	0.001	0.001	1e-05	0.001	1e-05	0.001
Lactococcus piscium	0	0	0.01	0	0	0	0	0	0	0.01	0.01	0	0	0.01	0	0	0.01	0	0	0	0	0	0	0	0	0	0	0.01	0	0	0.01	0	0	0	0	0	0	0	0	0	0	0.01	0.005	0.01	0.004	0.002	0.005	0.002	0.009
Lactobacillus casei	0	0.04	0	0	0	0	0	0	0.01	0	0	0	0	0	0	0	0	0.01	0	0	0	0	0.01	0	0	0	0	0	0	0	0	0	0	0	0	0	0.01	0	0	0	0	0	0.004	0.004	0.003	0.002	0.003	0.001	0.004
Lactobacillus curvatus	0	0	0.01	0	0	0	0	0	0.01	0.01	0	0	0	0	0	0	0.01	0	0	0	0	0	0.01	0	0	0	0	0	0	0	0.01	0	0	0	0	0	0.01	0.01	0	0	0	0	0.003	0.004	0.004	0.002	0.003	0.001	0.003
Bacillus gobiensis	0	0	0.01	0.01	0	0	0	0.01	0	0	0	0	0	0	0	0	0	0	0	0	0	0.01	0	0	0	0	0	0	0.01	0	0.01	0	0	0	0	0	0	0	0.01	0.01	0	0	0.002	0.005	0.004	0.003	0.004	0.002	0.004
Bacillus freudenreichii	0	0	0.01	0	0	0	0	0	0	0.01	0	0	0	0.01	0	0	0.01	0.01	0	0	0	0	0	0	0	0	0	0	0	0	0.01	0	0	0	0	0	0	0.01	0.01	0	0	0	0.005	0.006	0.004	0.002	0.003	0.002	0.005
Paenibacillus sp. FSL H7-0357	0	0	0	0	0	0	0	0.01	0	0	0	0	0	0.01	0	0	0	0.01	0	0	0	0	0	0	0	0	0	0.01	0	0	0	0	0.01	0	0.01	0	0	0.01	0	0.01	0	0	0.005	0.008	0.006	0.004	0.005	0.004	0.009
Paenibacillus sp. FSL R7-0273	0	0	0	0.01	0	0	0	0	0	0	0	0	0	0.01	0	0	0	0.01	0	0	0	0	0	0	0	0	0	0	0.01	0	0.01	0	0	0	0	0	0	0.01	0.01	0.01	0	0	0.008	0.007	0.006	0.003	0.004	0.006	0.008
Paenibacillus chitinolyticus	0	0	0	0	0	0	0	0.01	0	0	0	0	0	0.01	0	0	0	0	0	0	0	0	0	0	0	0	0	0.01	0	0	0	0	0.01	0	0.01	0	0	0.01	0	0.01	0	0.01	0.006	0.005	0.005	0.003	0.006	0.003	0.005
Paenibacillus sp. CAA11	0	0	0.01	0.01	0	0	0	0	0	0	0	0	0	0.01	0	0	0.01	0.01	0	0.01	0	0	0	0	0	0	0	0	0	0	0	0	0	0	0	0	0	0	0.01	0.01	0	0	0.003	0.007	0.003	0.003	0.006	0.003	0.007
Paenibacillus sp. FSL R5-0912	0	0	0.01	0	0	0	0	0	0	0.01	0	0	0	0	0	0	0.01	0.01	0.01	0	0	0	0	0.01	0	0	0	0	0	0	0.01	0	0	0	0	0	0	0.01	0	0	0	0	0.006	0.009	0.003	0.003	0.007	0.003	0.011
Paenibacillus sabinae	0	0	0.01	0	0	0	0	0	0.01	0.01	0	0	0	0.01	0	0	0	0.01	0	0	0	0	0.01	0	0	0	0	0.01	0	0	0	0	0	0	0	0	0.01	0	0	0	0	0	0.005	0.011	0.004	0.003	0.004	0.002	0.011
Staphylococcus xylosus	0	0	0.01	0	0	0	0	0	0.01	0	0	0	0	0	0	0	0	0.01	0	0	0	0.01	0.01	0	0	0	0	0	0	0	0	0	0	0	0	0	0.02	0	0	0.01	0	0	0.003	0.003	0.006	0.002	0.004	0.001	0.003
Macrococcus caseolyticus	0	0.01	0.01	0	0	0	0	0	0	0.01	0	0	0	0	0	0	0.01	0.01	0	0	0	0	0	0	0	0	0	0	0	0	0.01	0	0	0	0	0	0	0.01	0.01	0	0	0	0.002	0.009	0.001	0.001	0.005	0.002	0.006
[Bacillus] selenitireducens	0	0	0	0.01	0	0	0	0.01	0	0	0	0.01	0	0	0	0	0	0.01	0.01	0.01	0	0	0	0	0	0	0	0	0	0	0	0	0	0	0	0	0	0	0.01	0.01	0	0	0.004	0.006	0.004	0.002	0.01	0.002	0.006
Corynebacterium jeikeium	0	0	0.01	0	0	0	0	0	0.01	0.01	0	0	0	0	0	0	0.01	0	0	0	0	0	0.01	0	0	0	0	0	0	0	0.01	0	0	0	0	0	0.02	0	0	0	0	0	0.003	0.003	0.001	0.001	0.002	0.002	0.004
Rothia dentocariosa	0	0.01	0	0	0	0	0	0	0.01	0	0	0	0	0	0	0.01	0	0	0	0	0.01	0	0.01	0	0	0	0	0	0	0	0	0	0	0	0	0	0.01	0.01	0	0	0	0.01	0.001	0.002	0.003	0.001	0.001	0.001	0.002
Actinomyces hongkongensis	0	0.01	0	0	0	0	0	0	0	0	0	0	0	0.01	0	0.01	0	0	0	0	0.01	0	0	0	0	0	0	0	0	0.01	0	0	0	0	0.01	0	0	0	0	0.01	0	0.01	0.002	0.003	0.005	0.001	0.002	0.002	0.003
Schaalia meyeri	0	0.01	0	0	0	0	0	0	0	0	0	0	0	0.01	0	0.01	0	0	0	0	0	0	0	0	0	0	0	0	0	0.01	0	0	0	0	0	0	0.01	0	0	0.02	0	0.01	0.001	0.002	0.011	0.002	0.003	0.001	0.002
Actinoplanes sp. N902-109	0	0	0.01	0	0	0	0	0	0.01	0.01	0	0	0	0	0	0	0.01	0	0	0	0	0	0.01	0	0	0	0	0	0	0	0.01	0	0	0	0	0	0.01	0.01	0	0	0	0	0.003	0.01	0.002	0.001	0.002	0.002	0.011
Nostoc flagelliforme	0	0	0.02	0	0	0	0	0	0	0.03	0	0	0	0	0	0	0.01	0	0	0	0	0	0	0	0	0	0	0	0	0	0.01	0	0	0	0	0	0	0.01	0	0	0	0	0.001	0.005	0.002	0.001	0.001	0.001	0.004
Aster yellows witches'-broom phytoplasma	0	0	0.01	0	0	0	0	0	0.01	0.01	0	0	0	0	0	0	0.01	0	0	0	0	0	0.01	0	0	0	0	0	0	0	0.01	0	0	0	0	0	0.02	0	0	0	0	0	1e-05	1e-05	1e-05	1e-05	1e-05	1e-05	1e-05
Chryseobacterium glaciei	0	0	0.01	0	0.01	0	0	0	0	0.01	0	0.01	0	0	0	0	0.01	0	0	0	0	0	0	0	0	0.01	0	0	0	0	0.01	0	0.01	0	0	0	0	0	0	0	0	0	0.002	0.008	0.002	0.003	0.007	0.001	0.007
Chryseobacterium joostei	0	0	0	0	0.01	0	0	0	0.01	0	0	0.01	0	0	0	0	0	0	0	0	0	0	0.01	0	0	0.01	0	0	0	0	0	0	0.01	0	0	0	0.02	0	0	0	0	0	0.004	0.007	0.003	0.004	0.003	0.001	0.006
Flavobacterium album	0	0	0.01	0	0	0	0	0	0	0.01	0	0	0	0	0	0	0.01	0	0	0	0	0	0	0	0	0	0	0	0	0	0.01	0	0.01	0	0	0	0.01	0.01	0	0.01	0	0	0.003	0.034	0.003	0.003	0.003	0.003	0.034
Polaribacter sp. ALD11	0	0	0	0	0.01	0	0	0	0.01	0	0	0.01	0	0	0	0	0	0	0	0	0	0	0.01	0	0	0.01	0	0	0	0	0	0	0.01	0	0	0	0.02	0	0	0	0	0	0.003	0.003	0.005	0.003	0.006	0.002	0.003
Flavobacteriaceae bacterium F202Z8	0	0	0.01	0	0.01	0	0	0	0	0.01	0	0	0	0	0	0	0.01	0	0	0	0	0	0	0	0	0	0	0	0	0	0.01	0	0.01	0	0	0	0.01	0.01	0	0	0	0	0.003	0.008	0.002	0.003	0.002	0.001	0.007
Nonlabens marinus	0	0	0.01	0	0	0	0	0	0.01	0.01	0	0	0	0	0	0	0.01	0	0	0	0	0	0.01	0	0	0	0	0	0	0	0.01	0	0	0	0	0	0.02	0	0	0	0	0	0.001	0.006	1e-05	0.001	0.003	0.001	0.006
Olleya sp. Bg11-27	0	0	0.01	0	0	0	0	0	0.01	0.02	0	0	0	0	0	0	0.01	0	0	0	0	0	0.01	0	0	0	0	0	0	0	0.01	0	0	0	0	0	0.01	0	0	0	0	0	0.001	0.003	0.002	0.001	0.002	0.001	0.002
Aequorivita sublithincola	0	0	0.01	0	0	0	0	0	0	0.01	0	0	0	0	0	0	0.01	0	0	0	0	0	0.01	0.01	0	0	0	0	0	0	0.01	0	0	0	0	0	0.01	0.01	0	0	0	0	0.001	0.01	0.001	0.001	0.003	1e-05	0.008
Changchengzhania lutea	0	0	0.01	0	0	0	0	0	0	0.01	0	0.01	0	0	0	0	0.01	0	0	0	0	0	0	0	0	0	0	0	0.01	0	0.01	0	0	0	0	0	0.01	0.01	0	0	0	0	0.003	0.017	0.002	0.003	0.003	0.001	0.015
Cyclobacterium amurskyense	0	0	0.01	0	0	0	0	0	0.01	0.01	0	0	0	0	0	0	0.01	0	0	0	0	0	0.01	0	0	0	0	0	0	0	0.01	0	0	0	0	0	0.01	0.01	0	0	0	0	0.002	0.004	0.003	0.003	0.004	0.002	0.003
Algoriphagus sp. M8-2	0	0	0.01	0	0	0	0	0	0	0.01	0	0.01	0	0	0	0	0.01	0	0	0	0	0	0	0	0	0	0	0	0.01	0	0.01	0	0.01	0	0	0	0.01	0	0	0	0	0	0.002	0.01	0.002	0.002	0.007	0.001	0.011
Sphingobacterium daejeonense	0	0	0.01	0	0.01	0	0	0	0	0.01	0	0.01	0	0	0	0	0	0	0	0	0	0	0	0	0	0.01	0	0	0	0	0.01	0	0.01	0	0	0	0	0.01	0	0	0	0	0.003	0.008	0.002	0.005	0.008	0.002	0.008
Sphingobacterium sp. B29	0	0	0.01	0	0	0	0	0	0.01	0.01	0	0	0	0	0	0	0.01	0	0	0	0	0	0.01	0	0	0	0	0	0	0	0.01	0	0	0	0	0	0.02	0	0	0	0	0	0.001	0.007	1e-05	0.002	0.006	0.001	0.007
Chlorobium phaeobacteroides	0	0	0.01	0	0	0	0	0	0	0.01	0	0	0	0	0	0	0.01	0.01	0	0	0	0	0	0.01	0	0	0	0	0	0	0.01	0	0	0	0	0	0	0.01	0.01	0	0	0	0.004	0.008	0.003	0.004	0.002	0.003	0.007
Chlorobaculum tepidum	0	0	0.01	0	0	0	0	0	0.01	0.01	0	0	0	0	0	0	0.01	0	0	0	0	0	0.01	0	0	0	0	0	0	0	0.01	0	0	0	0	0	0.02	0	0	0	0	0	0.003	0.007	1e-05	0.001	1e-05	1e-05	0.007
Citrobacter pasteurii	0	0	0	0	0	0	0	0	0	0	0	0	0	0	0	0.08	0	0	0	0	0	0	0	0	0	0	0	0	0	0	0	0	0	0	0	0	0	0	0	0	0	0	0.002	1e-05	1e-05	1e-05	1e-05	1e-05	1e-05
Leclercia adecarboxylata	0	0	0	0	0	0	0	0	0	0	0	0	0	0.01	0	0.02	0	0	0	0	0	0	0	0	0	0	0	0.01	0	0.01	0	0	0.01	0	0	0	0.01	0	0	0	0.01	0	0.005	0.005	0.002	0.003	0.003	0.002	0.005
[Enterobacter] lignolyticus	0	0	0	0	0	0	0	0	0.01	0	0	0	0	0	0	0.01	0	0	0	0	0	0	0.01	0	0	0	0	0.01	0	0	0	0	0.01	0	0	0	0.02	0	0	0	0.01	0	0.003	0.003	0.004	0.003	0.003	0.003	0.004
Serratia liquefaciens	0	0	0.01	0	0	0	0	0	0.01	0.01	0	0	0	0	0	0	0.01	0	0	0	0	0	0.01	0	0	0	0	0	0	0	0.01	0	0	0	0	0	0.02	0	0	0	0	0	0.001	0.008	1e-05	0.001	0.001	1e-05	0.007
Yersinia aleksiciae	0	0	0.01	0	0	0	0	0	0.01	0.01	0	0	0	0	0	0	0.01	0	0	0	0	0	0.01	0	0	0	0	0	0	0	0.01	0	0	0	0	0	0.02	0	0	0	0	0	0.002	0.009	0.001	0.001	0.001	1e-05	0.011
Dickeya zeae	0	0	0.01	0	0	0	0	0	0.01	0.01	0	0	0	0	0	0	0.01	0	0	0	0	0	0.01	0	0	0	0	0	0	0	0.01	0	0	0	0	0	0.01	0.01	0	0	0	0	0.004	0.01	0.004	0.002	0.003	0.002	0.01
Dickeya dianthicola	0	0	0.01	0	0	0	0	0	0.01	0.01	0	0	0	0	0	0	0.01	0	0	0	0	0	0.01	0	0	0	0	0	0	0	0.01	0	0	0	0	0	0.02	0	0	0	0	0	0.001	0.004	0.001	0.001	1e-05	0.001	0.003
Pectobacterium carotovorum	0	0	0.01	0	0	0	0	0.01	0	0.01	0	0.01	0	0	0	0.01	0.01	0.01	0	0	0	0	0	0.01	0	0	0	0	0	0	0	0	0	0	0	0	0	0	0	0	0	0	0.004	0.006	0.004	0.003	0.004	0.004	0.006
Edwardsiella tarda	0	0	0.01	0	0	0	0	0	0.01	0.01	0	0	0	0	0	0	0.01	0	0	0	0	0	0.01	0.01	0	0	0	0	0	0	0.01	0	0	0	0	0	0.01	0	0	0	0	0	0.001	0.006	0.001	0.001	0.001	0.001	0.007
Haemophilus sp. oral taxon 036	0	0	0	0	0	0	0	0	0	0	0	0	0	0	0	0.01	0	0	0.01	0	0.01	0	0	0	0	0.02	0	0.01	0	0	0	0	0	0	0	0	0	0	0	0.01	0	0.01	1e-05	0.001	0.002	1e-05	0.001	0.003	0.001
Acinetobacter pittii	0	0	0.01	0	0	0	0	0	0.01	0.01	0	0	0	0	0	0	0.01	0	0	0	0	0	0.01	0	0	0	0	0.01	0	0	0.01	0	0	0	0	0	0.01	0	0	0	0	0	0.002	0.003	0.003	0.001	0.001	1e-05	0.003
Psychrobacter sp. G	0	0	0.01	0	0	0	0	0	0.01	0.01	0	0	0	0	0	0	0.01	0	0	0	0	0	0.01	0	0	0	0	0	0	0	0.01	0	0	0	0	0	0.02	0	0	0	0	0	1e-05	0.007	1e-05	1e-05	1e-05	1e-05	0.007
Alteromonas macleodii	0	0	0.01	0	0	0	0	0	0.01	0.01	0	0	0	0	0	0	0.01	0	0	0	0	0	0.01	0	0	0	0	0	0	0	0.01	0	0	0	0	0	0.02	0	0	0	0	0	0.002	0.01	0.002	0.002	0.003	0.001	0.009
Vibrio gazogenes	0	0	0.01	0	0	0	0	0	0.01	0.01	0	0	0	0	0	0	0.01	0	0	0	0	0	0.01	0	0	0	0	0	0	0	0.01	0	0	0	0	0	0.01	0.01	0	0	0	0	0.003	0.004	0.004	0.002	0.002	0.002	0.004
Vibrio coralliilyticus	0	0	0.01	0	0	0	0	0	0.01	0.01	0	0	0	0	0	0	0.01	0	0	0	0	0	0.01	0	0	0	0	0	0	0	0.01	0	0	0	0	0	0.01	0.01	0	0	0	0	0.003	0.009	0.002	0.002	0.001	0.001	0.009
Vibrio casei	0	0	0.01	0	0	0	0	0	0.01	0.01	0	0	0	0	0	0	0.01	0	0	0	0	0	0.01	0	0	0	0	0	0	0	0.01	0	0	0	0	0	0.02	0	0	0	0	0	0.001	0.01	0.002	0.001	0.004	0.001	0.009
Xanthomonas cassavae	0	0	0.01	0	0	0	0	0	0.01	0.01	0	0	0	0	0	0	0.01	0	0	0	0	0	0.01	0	0	0	0	0	0	0	0.01	0	0	0	0	0	0.02	0	0	0	0	0	0.001	0.012	0.001	0.001	0.001	0.001	0.013
Acidihalobacter prosperus	0	0	0.01	0	0	0	0	0	0.01	0.01	0	0	0	0	0	0	0	0	0	0	0	0	0.01	0	0	0	0	0	0	0	0.01	0	0	0	0	0	0.02	0.01	0	0	0	0	0.003	0.008	0.002	0.002	0.002	0.002	0.008
Legionella pneumophila	0	0	0.01	0	0	0	0	0	0	0.01	0	0	0	0	0	0	0.01	0	0	0	0	0	0	0.01	0	0	0	0	0.01	0	0.01	0	0	0	0	0	0	0.01	0.01	0	0	0	0.006	0.009	0.005	0.002	0.003	0.002	0.007
Frischella perrara	0	0	0.01	0	0	0	0	0	0.01	0.01	0	0	0	0	0	0	0	0	0	0	0	0	0.01	0	0	0	0	0	0	0	0.01	0	0	0	0	0	0.02	0.01	0	0	0	0	0.002	0.008	0.001	0.001	0.001	0.001	0.006
Desulfovibrio hydrothermalis	0	0	0.01	0	0	0	0	0	0.01	0.01	0	0	0	0	0	0	0.01	0	0	0	0	0	0.01	0	0	0	0	0	0	0	0.01	0	0	0	0	0	0.01	0.01	0	0	0	0	0.004	0.01	0.001	0.001	0.001	0.001	0.01
Pelobacter carbinolicus	0	0	0.01	0	0	0	0	0	0.01	0.01	0	0	0	0	0	0	0.01	0	0	0	0	0	0.01	0	0	0	0	0	0	0	0.01	0	0	0	0	0	0.02	0	0	0	0	0	0.002	0.014	0.003	0.002	0.002	0.002	0.013
Desulfurivibrio alkaliphilus	0	0	0.01	0	0	0	0	0	0.01	0.01	0	0	0	0	0	0	0.01	0	0	0	0	0	0.01	0	0	0	0	0	0	0	0.01	0	0	0	0	0	0.01	0.01	0	0	0	0	0.003	0.009	0.002	0.001	0.002	0.001	0.009
Arcobacter butzleri	0	0	0.01	0	0	0	0	0	0	0.01	0	0	0	0	0	0	0.01	0	0	0	0	0.01	0	0.01	0	0	0	0	0.01	0	0.01	0	0	0	0	0	0	0.01	0	0	0	0	0.002	0.015	0.002	0.002	0.002	0.001	0.012
Hoeflea sp. IMCC20628	0	0	0.01	0	0	0	0	0	0.01	0.01	0	0	0	0	0	0	0.01	0	0	0	0	0	0.01	0	0	0	0	0	0	0	0.01	0	0	0	0	0	0.02	0	0	0	0	0	0.002	0.006	0.001	0.001	0.001	0.001	0.005
Bartonella apis	0	0	0.01	0	0	0	0	0	0	0.01	0	0	0	0	0	0	0.01	0.01	0	0	0	0	0	0.01	0	0	0	0	0	0	0.01	0	0	0	0	0	0	0.01	0.01	0	0	0	0.003	0.006	0.001	0.002	0.004	0.001	0.005
Komagataeibacter medellinensis	0	0	0.01	0	0	0	0	0	0.01	0.01	0	0	0	0	0	0	0.01	0	0	0	0	0	0.01	0	0	0	0	0	0	0	0.01	0	0	0	0	0	0.01	0.01	0	0	0	0	0.001	0.011	0.001	0.001	0.001	1e-05	0.011
Sphingobium sp. YG1	0	0	0.01	0	0	0	0	0	0.01	0.01	0	0	0	0	0	0	0.01	0	0	0	0	0	0.01	0	0	0	0	0	0	0	0.01	0	0	0	0	0	0.02	0	0	0	0	0	0.001	0.009	0.001	0.001	0.001	0.002	0.01
Sphingobium sp. SCG-1	0	0	0.01	0	0	0	0	0	0.01	0.01	0	0	0	0	0	0	0.01	0	0	0	0	0	0.01	0	0	0	0	0	0	0	0.01	0	0	0	0	0	0.02	0	0	0	0	0	0.002	0.007	1e-05	0.001	0.003	1e-05	0.007
Brevundimonas diminuta	0	0	0	0	0.01	0	0	0	0	0	0	0	0	0.01	0	0.01	0	0.01	0	0	0.01	0	0	0	0	0	0	0	0	0	0	0.01	0	0	0	0	0.01	0	0	0	0	0.01	0.001	0.001	0.002	0.001	0.001	1e-05	0.002
Cupriavidus metallidurans	0	0	0.01	0	0	0	0	0	0	0.01	0	0.01	0	0	0	0	0.01	0	0	0	0	0	0	0.01	0.01	0	0	0	0	0	0.01	0	0	0	0	0	0	0.01	0	0	0	0	0.003	0.008	0.001	0.005	0.002	0.002	0.009
Paraburkholderia phenoliruptrix	0	0	0.01	0	0	0	0	0	0	0.01	0.01	0	0	0	0	0	0.01	0.01	0	0	0	0.01	0	0.01	0	0	0	0	0	0	0.01	0	0	0	0	0	0	0	0	0	0	0	1e-05	0.004	0.001	0.001	1e-05	1e-05	0.005
Neisseria meningitidis	0	0	0	0.01	0	0	0	0	0.01	0	0	0	0	0	0	0	0.01	0.01	0	0	0	0	0.01	0	0.01	0	0	0	0	0	0	0.01	0	0	0	0	0	0	0.01	0	0	0	0.001	0.001	0.003	0.001	0.004	0.003	0.001
Methylacidiphilum infernorum	0	0	0.01	0	0	0	0	0	0.01	0.01	0	0	0	0	0	0	0.01	0	0	0	0	0	0.01	0	0	0	0	0	0	0	0.01	0	0	0	0	0	0.02	0	0	0	0	0	1e-05	0.005	1e-05	1e-05	1e-05	1e-05	0.006
Salinispira pacifica	0	0	0.01	0	0	0	0	0	0.01	0.01	0	0	0	0	0	0	0.01	0	0	0	0	0	0.01	0	0	0	0	0	0	0	0.01	0	0	0	0	0	0.01	0.01	0	0	0	0	0.001	0.009	0.001	0.002	0.001	0.001	0.01
Fervidobacterium pennivorans	0	0	0.01	0	0	0	0	0	0.01	0.01	0	0	0	0	0	0	0.01	0	0	0	0	0	0.01	0	0	0	0	0	0	0	0.01	0	0	0	0	0	0.02	0	0	0	0	0	0.002	0.005	0.001	0.002	0.001	0.001	0.005
Citrobacter amalonaticus	0	0	0	0	0	0	0.03	0	0	0	0	0	0	0	0	0.03	0	0.01	0	0	0	0	0	0	0	0	0	0	0	0	0	0	0	0	0	0	0	0	0	0	0.01	0	0.004	0.002	0.001	0.002	0.001	0.001	0.002
Lactobacillus acidophilus	0.05	0	0	0	0	0	0	0	0	0	0	0	0	0	0	0	0	0	0	0	0	0	0	0	0	0	0	0	0	0.01	0	0	0	0	0	0.01	0	0	0	0	0	0	0.002	0.003	0.002	0.001	0.002	0.001	0.003
Streptococcus uberis	0.01	0	0	0	0	0	0	0	0	0	0	0	0	0	0	0	0	0.01	0	0	0	0	0.01	0	0	0	0	0	0.01	0.01	0	0	0	0	0	0	0.01	0	0.01	0	0	0	0.002	0.006	0.009	0.002	0.002	0.004	0.004
Tetragenococcus halophilus	0.01	0	0	0	0	0	0	0.01	0	0	0	0	0	0	0	0	0	0.01	0	0	0	0	0.01	0	0	0	0	0	0.01	0.01	0	0	0	0	0	0	0.01	0	0	0	0	0	0.004	0.005	0.005	0.003	0.003	0.004	0.004
Bacillus cytotoxicus	0.01	0	0	0.01	0	0	0	0	0	0	0	0	0	0.01	0	0	0	0	0	0	0	0	0	0	0	0	0	0.01	0.01	0	0	0	0	0	0	0	0	0	0.01	0.01	0	0	0.004	0.007	0.006	0.003	0.003	0.002	0.006
Bacillus circulans	0.01	0	0	0.01	0	0	0	0.01	0	0	0	0	0	0.01	0	0	0	0	0	0	0	0	0	0	0	0	0	0.01	0.01	0	0	0	0	0	0	0	0	0	0.01	0	0	0	0.005	0.009	0.007	0.002	0.004	0.003	0.007
Oceanobacillus iheyensis	0.01	0	0	0.01	0	0	0	0.01	0	0	0	0	0	0.01	0	0	0	0	0	0	0	0.01	0	0	0	0	0	0	0.01	0	0	0	0	0	0	0	0	0	0.01	0	0	0	0.005	0.008	0.007	0.004	0.003	0.005	0.005
Cellulophaga baltica	0.01	0	0	0	0.01	0	0	0	0	0	0	0.01	0	0	0	0	0	0	0	0	0	0	0	0	0	0.01	0	0	0.01	0	0	0	0.01	0	0	0	0.01	0	0	0	0	0	0.002	0.01	0.005	0.004	0.005	0.004	0.009
Desulfitobacterium dichloroeliminans	0	0	0.01	0	0	0	0	0	0	0.01	0	0	0	0	0	0	0.01	0.01	0	0	0	0	0	0	0	0	0	0	0	0	0.01	0	0	0	0	0	0	0.01	0.01	0	0	0	0.003	0.081	0.004	0.001	0.005	0.002	0.08
Desulfotomaculum reducens	0	0	0.01	0.01	0	0	0	0	0	0	0	0	0	0	0	0	0.01	0.01	0	0	0	0	0	0	0	0	0	0	0	0	0.01	0	0	0	0	0	0	0.01	0.01	0	0	0	0.004	0.005	0.004	0.001	0.004	0.001	0.005
Streptococcus sp. ChDC B345	0	0.01	0	0	0	0	0	0	0	0	0	0	0	0	0	0.02	0	0.01	0	0	0	0	0	0	0	0	0	0	0	0	0	0	0	0	0	0	0.01	0	0	0.01	0	0.01	0.001	0.001	0.004	0.004	0.001	0.001	0.001
Streptococcus sp. NPS 308	0	0.01	0	0	0	0	0	0	0	0	0.01	0	0	0	0	0.02	0	0	0	0	0	0	0	0	0.01	0	0	0	0	0	0	0	0	0	0	0	0.01	0	0.01	0	0	0	1e-05	0.002	0.004	0.002	0.001	0.001	0.001
Bacillus pumilus	0	0	0.01	0	0	0	0	0	0	0.01	0	0	0	0.01	0	0	0.01	0.01	0	0	0	0.01	0	0	0	0	0	0.01	0	0	0	0	0	0	0	0	0	0	0	0	0	0	0.004	0.007	0.004	0.003	0.003	0.003	0.005
Bacillus safensis	0	0	0.01	0	0	0	0	0	0.01	0.01	0	0	0	0	0	0	0	0	0	0	0	0	0.01	0	0	0	0	0	0	0	0.01	0	0	0	0	0	0.01	0	0.01	0	0	0	0.005	0.009	0.002	0.001	0.002	0.003	0.007
Paenibacillus sp. RUD330	0	0	0	0	0	0	0	0.01	0	0	0	0	0	0	0.01	0	0	0	0	0	0	0	0	0.01	0	0	0	0	0.01	0	0	0	0	0	0	0.01	0	0.01	0.01	0	0	0	0.006	0.006	0.004	0.004	0.004	0.003	0.009
Paenibacillus beijingensis	0	0	0.01	0	0	0	0	0	0	0.01	0	0	0	0	0	0	0.01	0.01	0	0	0	0	0	0.01	0	0	0	0	0	0	0.01	0	0	0	0	0	0	0.01	0	0	0	0	0.006	0.005	0.003	0.004	0.004	0.002	0.006
Paenibacillus sp. FSL R5-0345	0	0	0.01	0.01	0	0	0	0	0	0	0	0	0	0.01	0	0	0	0.01	0	0	0	0	0	0	0	0	0	0.01	0	0	0	0	0	0	0	0	0	0	0.01	0.01	0	0	0.006	0.03	0.004	0.003	0.003	0.003	0.026
Tumebacillus avium	0	0	0.01	0	0	0	0	0	0.01	0	0	0	0	0	0	0.01	0.01	0	0	0	0	0	0.01	0	0	0	0	0	0	0	0	0	0	0	0	0	0.01	0.01	0	0	0	0	0.006	0.008	0.005	0.003	0.003	0.002	0.008
Streptomyces sp. 11-1-2	0	0	0.01	0	0	0	0	0	0.01	0.01	0	0	0	0	0	0	0.01	0	0	0	0	0	0.01	0	0	0	0	0	0	0	0.01	0	0	0	0	0	0.01	0	0	0	0	0	1e-05	0.004	1e-05	1e-05	1e-05	1e-05	0.003
Corynebacterium sp. 2069/2	0	0	0.01	0	0	0	0	0	0	0.01	0	0	0	0	0	0	0.01	0	0	0	0	0	0.01	0	0	0	0	0	0	0	0.01	0	0	0	0	0	0.01	0.01	0	0	0	0	0.002	0.007	1e-05	1e-05	0.001	1e-05	0.007
Corynebacterium sp. 2184	0	0	0.01	0	0	0	0	0	0.01	0.01	0	0	0	0	0	0	0	0	0	0	0	0	0.01	0	0	0	0	0	0	0	0.01	0	0	0	0	0	0.02	0	0	0	0	0	0.001	0.007	1e-05	1e-05	1e-05	1e-05	0.006
Mycobacterium haemophilum	0	0	0.01	0	0	0	0	0	0.01	0.01	0	0	0	0	0	0	0.01	0	0	0	0	0	0.01	0	0	0	0	0	0	0	0.01	0	0	0	0	0	0.01	0	0	0	0	0	0.001	0.003	0.001	0.001	0.002	1e-05	0.004
Rhodococcus hoagii	0	0	0.01	0	0	0	0	0	0.01	0.01	0	0	0	0	0	0	0.01	0	0	0	0	0	0.01	0	0	0	0	0	0	0	0.01	0	0	0	0	0	0.01	0	0	0	0	0	0.002	0.007	0.001	0.001	0.001	1e-05	0.008
Rhodococcus sp. WMMA185	0	0	0.01	0	0	0	0	0	0.01	0.01	0	0	0	0	0	0	0	0	0	0	0	0	0.01	0	0	0	0	0	0	0	0.01	0	0	0	0	0	0.02	0	0	0	0	0	0.001	0.006	0.001	0.001	0.001	1e-05	0.008
Glutamicibacter creatinolyticus	0	0.01	0.01	0	0	0	0	0	0	0.01	0	0	0	0	0	0	0.01	0	0	0	0	0	0.01	0	0	0	0	0	0	0	0.01	0	0	0	0	0	0.01	0	0	0	0	0	0.001	0.007	0.001	0.001	0.002	1e-05	0.006
Planktothrix agardhii	0	0	0	0	0	0	0	0	0.01	0	0	0	0	0	0	0	0	0	0	0	0	0	0.01	0	0	0	0	0	0.01	0	0.01	0	0	0	0	0	0.03	0	0	0	0	0	0.002	0.008	0.003	1e-05	0.001	0.001	0.006
Oscillatoriales cyanobacterium JSC-12	0	0	0.01	0	0	0	0	0	0.01	0.01	0	0	0	0	0	0	0.01	0	0	0	0	0	0.01	0	0	0	0	0	0	0	0.01	0	0	0	0	0	0.01	0	0	0	0	0	0.001	0.001	0.001	0.001	0.001	0.002	0.002
Leptolyngbya sp. NIES-3755	0	0	0	0	0	0	0	0	0.01	0	0	0	0	0	0	0	0	0	0	0	0	0	0.02	0	0	0	0	0	0	0	0.01	0	0	0	0	0	0.03	0	0	0	0	0	0.001	0.011	0.003	0.001	0.002	0.001	0.01
Chryseobacterium sp. 17S1E7	0	0	0	0	0.01	0	0	0	0.01	0	0	0.01	0	0	0	0	0	0	0	0	0	0	0.01	0	0	0	0	0	0	0	0	0	0.01	0	0	0	0.02	0	0	0	0	0	0.004	0.004	0.003	0.003	0.004	0.001	0.004
Tenacibaculum sp. SZ-18	0	0	0.01	0	0.01	0	0	0	0	0.01	0	0.01	0	0	0	0	0	0	0	0	0	0	0	0	0	0.01	0	0	0.01	0	0.01	0	0	0	0	0	0	0	0	0	0	0	0.002	0.011	0.003	0.003	0.003	0.002	0.009
Flavobacteriaceae bacterium 3519-10	0	0	0	0	0	0	0	0	0	0.01	0	0.01	0	0	0	0	0.01	0	0	0	0	0	0	0	0	0	0	0	0	0	0.01	0	0.01	0	0	0	0.01	0.01	0	0	0	0	0.003	0.01	0.002	0.003	0.006	0.002	0.01
Salegentibacter salegens	0	0	0.01	0	0.01	0	0	0	0	0.01	0	0.01	0	0	0	0	0.01	0	0	0	0	0	0	0	0	0.01	0	0	0	0	0	0	0.01	0	0	0	0	0	0	0	0	0	0.002	0.003	0.003	0.004	0.006	0.001	0.002
Hymenobacter sp. 17J36-26	0	0	0.01	0	0	0	0	0	0	0.01	0	0	0	0	0	0	0.01	0	0	0	0	0	0	0.01	0	0	0	0	0	0	0.01	0	0.01	0	0	0	0	0.01	0	0	0	0	0.005	0.021	0.001	0.002	0.002	0.001	0.021
Spirosoma radiotolerans	0	0	0.01	0	0	0	0	0	0	0.01	0	0	0	0	0	0	0.01	0	0	0	0	0	0	0.01	0	0	0	0	0.01	0	0.01	0	0	0	0	0	0	0.01	0	0	0	0	0.002	0.006	0.002	0.002	0.005	0.002	0.006
Cardinium endosymbiont of Sogatella furcifera	0	0	0.01	0	0	0	0	0	0.01	0.01	0	0	0	0	0	0	0	0	0	0	0	0	0.01	0	0	0	0	0	0	0	0.01	0	0	0	0	0	0.02	0	0	0	0	0	1e-05	0.007	1e-05	1e-05	0.002	1e-05	0.007
Chlorobium limicola	0	0	0.01	0	0	0	0	0	0.01	0.01	0	0	0	0	0	0	0	0	0	0	0	0	0.01	0	0	0	0	0	0	0	0.01	0	0	0	0	0	0.02	0	0	0	0	0	0.003	0.009	0.003	0.002	0.004	0.003	0.008
Pelodictyon luteolum	0	0	0.01	0	0	0	0	0	0.01	0.01	0	0	0	0	0	0	0	0	0	0	0	0	0.01	0	0	0	0	0	0	0	0.01	0	0	0	0	0	0.01	0.01	0	0	0	0	0.003	0.01	0.002	0.002	0.004	0.001	0.011
Pectobacterium parmentieri	0	0	0.01	0	0	0	0	0	0.01	0.01	0	0	0	0	0	0	0.01	0	0	0	0	0	0.01	0	0	0	0	0	0	0	0.01	0	0	0	0	0	0.01	0	0	0	0	0	0.001	0.007	0.001	0.001	0.001	0.001	0.007
Pseudomonas vancouverensis	0	0	0.01	0	0	0	0	0	0.01	0.01	0	0	0	0	0	0	0	0	0	0	0	0	0.01	0	0	0	0	0	0	0	0.01	0	0	0	0	0	0.02	0	0	0	0	0	0.001	0.006	1e-05	0.001	0.001	1e-05	0.005
Acinetobacter radioresistens	0	0	0.01	0	0	0	0	0	0.01	0	0	0	0	0	0	0	0	0	0	0	0	0	0.01	0	0	0	0	0	0	0	0.01	0	0	0	0	0	0.03	0	0	0	0	0	0.002	0.007	0.001	0.001	0.004	0.001	0.006
Acinetobacter johnsonii	0	0	0	0	0.01	0	0	0	0	0	0	0	0	0.01	0	0	0	0	0	0	0.01	0	0	0	0	0	0	0	0	0	0	0.01	0.03	0	0	0	0	0	0	0	0	0	0.002	0.001	0.001	0.004	0.001	0.001	0.001
Acinetobacter lwoffii	0	0	0	0	0	0	0	0	0	0	0	0	0	0.01	0	0	0	0.01	0	0	0.01	0	0	0	0	0	0	0	0	0	0	0.01	0	0	0.01	0	0	0	0.01	0	0	0.01	0.001	0.008	0.001	0.001	1e-05	1e-05	0.007
Glaciecola nitratireducens	0	0	0.01	0	0	0	0	0	0	0.01	0	0	0	0	0	0	0.01	0	0	0	0	0	0.01	0	0	0	0	0	0	0	0.01	0	0	0	0	0	0.01	0.01	0	0	0	0	0.001	0.009	0.002	0.002	0.001	1e-05	0.009
Vibrio fluvialis	0	0	0.01	0	0	0	0	0	0.01	0.01	0	0	0	0	0	0	0	0	0	0	0	0	0.01	0	0	0	0	0	0	0	0.01	0	0	0	0	0	0.02	0	0	0	0	0	0.003	0.011	0.001	0.002	0.002	0.001	0.012
Vibrio anguillarum	0	0	0	0	0	0	0	0	0.02	0	0	0	0	0	0	0	0	0	0	0	0	0	0.02	0	0	0	0	0	0	0	0	0	0	0	0	0	0.03	0	0	0	0	0	0.001	0.005	0.002	0.001	0.001	1e-05	0.004
Xanthomonas euvesicatoria	0	0	0	0	0	0	0	0	0	0	0.01	0	0	0	0	0.01	0	0.01	0.01	0	0.01	0	0	0.01	0	0	0	0	0	0	0.01	0	0	0	0	0	0	0	0	0	0	0	0.002	0.01	0.001	1e-05	0.001	0.001	0.007
Rhodanobacteraceae bacterium Dysh456	0	0	0.01	0	0	0	0	0	0	0.01	0	0	0	0	0	0	0.01	0.01	0	0	0	0.01	0	0.01	0	0	0	0	0	0	0.01	0	0	0	0	0	0	0	0	0	0	0	0.001	0.004	1e-05	0.001	0.001	0.001	0.005
Luteibacter pinisoli	0	0	0.01	0	0	0	0	0	0.01	0.01	0	0	0	0	0	0	0	0	0	0	0	0	0.01	0	0	0	0	0	0	0	0.01	0	0	0	0	0	0.02	0	0	0	0	0	0.002	0.006	0.001	0.001	0.001	0.001	0.007
Alkalilimnicola ehrlichii	0	0	0.01	0	0	0	0	0	0	0.01	0	0	0	0	0	0	0.01	0	0	0	0	0	0.01	0	0	0	0	0	0	0	0.01	0	0	0	0	0	0.01	0.01	0	0	0	0	0.001	0.006	0.001	0.001	0.001	0.001	0.006
Aeromonas salmonicida	0	0	0.01	0	0	0.01	0	0	0	0.01	0	0	0	0	0	0	0.01	0.01	0	0	0	0	0	0.01	0	0	0	0	0	0	0.01	0	0	0	0	0	0	0	0	0	0	0	0.002	0.002	0.001	0.001	0.001	0.001	0.002
Aeromonas caviae	0	0	0.01	0	0	0	0	0	0.01	0.01	0	0	0	0	0	0.01	0.01	0	0	0	0	0	0.01	0	0	0	0	0	0	0	0	0	0	0	0	0	0.01	0	0	0	0	0	1e-05	0.004	1e-05	0.001	0.001	1e-05	0.004
Desulfovibrio alaskensis	0	0	0	0	0	0	0	0	0	0	0	0.01	0.01	0	0	0	0.01	0	0	0	0	0	0	0.01	0.01	0	0	0	0	0	0	0	0	0.01	0	0	0	0	0	0	0.01	0	0.005	0.006	0.002	0.005	0.003	0.002	0.006
Campylobacter concisus	0	0	0.01	0	0	0	0	0	0.02	0	0	0	0	0	0	0	0.01	0	0	0	0	0	0.01	0	0	0	0	0	0	0	0.01	0	0	0	0	0	0.01	0	0	0	0	0	0.004	0.01	0.023	0.002	0.002	0.008	0.009
Bradyrhizobium erythrophlei	0	0	0.01	0	0	0	0	0	0	0.01	0	0	0	0	0	0	0.01	0	0	0	0	0	0.01	0	0	0	0	0	0	0	0.01	0	0	0	0	0	0.01	0.01	0	0	0	0	0.005	0.007	0.003	0.004	0.003	0.002	0.009
Aminobacter aminovorans	0	0	0.01	0	0	0	0	0	0.01	0.01	0	0	0	0	0	0	0.01	0	0	0	0	0	0.01	0	0	0	0	0	0	0	0.01	0	0	0	0	0	0.01	0	0	0	0	0	0.003	0.005	0.001	0.001	1e-05	1e-05	0.006
Hyphomicrobium denitrificans	0	0	0.01	0	0	0	0	0	0.01	0.01	0	0	0	0	0	0	0	0	0	0	0	0	0.01	0	0	0	0	0	0	0	0.01	0	0	0	0	0	0.02	0	0	0	0	0	0.001	0.007	0.001	0.002	0.002	1e-05	0.008
Sulfitobacter sp. D7	0	0	0	0	0	0	0	0	0.01	0.01	0	0	0	0	0	0	0.01	0	0	0	0	0	0.01	0	0	0	0	0	0	0	0.01	0	0	0	0	0	0.02	0	0	0	0	0	0.001	0.007	0.001	1e-05	0.001	0.001	0.009
Polynucleobacter necessarius	0	0	0.01	0	0	0	0	0	0	0.01	0	0.01	0	0	0	0	0.01	0	0	0	0	0	0	0	0	0	0	0	0	0	0.01	0	0.01	0	0	0	0	0.01	0	0	0	0	0.004	0.005	0.004	0.003	0.006	0.001	0.006
Acidovorax avenae	0	0	0.01	0	0	0	0	0	0	0.01	0	0	0	0	0	0	0.01	0.01	0	0	0	0	0	0.01	0	0	0	0	0	0	0.01	0	0	0	0	0	0	0.01	0	0	0	0	0.003	0.011	0.003	0.004	0.003	0.002	0.012
Comamonas testosteroni	0	0	0.01	0	0	0	0	0	0	0.01	0	0	0	0	0	0	0.01	0	0	0	0	0	0	0.01	0	0	0	0	0	0	0.01	0	0	0	0	0	0	0	0	0	0	0.02	0.003	0.003	0.002	0.002	0.002	0.001	0.004
Herbaspirillum rubrisubalbicans	0	0	0.01	0	0	0	0	0	0.01	0.01	0	0	0	0	0	0	0.01	0	0	0	0	0	0.01	0	0	0	0	0	0	0	0.01	0	0	0	0	0	0.01	0	0	0	0	0	0.002	0.004	0.001	0.001	0.003	0.001	0.006
Paucibacter sp. KCTC 42545	0	0	0.01	0	0	0	0	0	0.01	0.01	0	0	0	0	0	0	0.01	0	0	0	0	0	0.01	0	0	0	0	0	0	0	0.01	0	0	0	0	0	0.01	0	0	0	0	0	0.003	0.009	0.002	0.003	0.002	0.001	0.011
Pseudogulbenkiania sp. NH8B	0	0	0.01	0	0	0	0	0	0.01	0.01	0	0	0	0	0	0	0.01	0	0	0	0	0	0.01	0	0	0	0	0	0	0	0.01	0	0	0	0	0	0.01	0	0	0	0	0	0.001	0.009	0.001	0.001	0.001	0.001	0.01
Ferriphaselus amnicola	0	0	0	0	0	0	0	0	0.01	0.01	0	0	0	0	0	0	0	0	0	0	0	0	0.01	0	0	0	0	0	0	0	0.01	0	0	0	0	0	0.03	0	0	0	0	0	0.001	0.004	0.001	1e-05	0.001	1e-05	0.005
Silvanigrellales bacterium RF1110005	0	0	0.01	0	0	0	0	0	0	0.01	0	0	0	0	0	0	0.01	0	0	0	0	0	0.01	0	0	0	0	0	0	0	0.01	0	0	0	0	0	0.01	0.01	0	0	0	0	0.001	0.009	0.002	0.001	0.005	0.001	0.009
Leptotrichia sp. oral taxon 847	0	0	0.01	0	0	0	0	0	0.01	0.01	0	0	0	0	0	0	0.01	0	0	0	0	0	0.01	0	0	0	0	0	0	0	0.01	0	0	0	0	0	0.01	0	0	0	0	0	0.002	0.009	0.003	0.001	0.001	1e-05	0.008
Bacillus bombysepticus	0	0	0	0	0.03	0	0	0	0	0	0	0	0	0	0	0	0	0	0.01	0	0	0	0	0	0	0.03	0	0	0	0	0	0	0	0	0	0	0	0	0	0	0	0	1e-05	1e-05	1e-05	1e-05	1e-05	1e-05	1e-05
Lactobacillus sp. Koumiss	0	0	0	0	0	0	0	0	0	0	0	0.01	0	0.01	0	0	0	0	0	0	0	0	0	0	0	0	0	0	0	0.05	0	0	0	0	0	0	0	0	0	0	0	0	1e-05	1e-05	1e-05	1e-05	1e-05	1e-05	1e-05
Lysinibacillus sp. 2017	0	0	0	0.01	0	0	0	0	0.01	0	0	0	0	0	0	0	0	0.01	0	0	0	0	0.01	0	0	0	0	0	0	0	0	0	0	0	0	0	0.02	0	0.01	0	0	0	0.003	0.009	0.005	0.002	0.002	0.005	0.008
Staphylococcus saprophyticus	0	0	0	0	0	0	0	0	0.01	0	0	0	0	0	0	0	0	0	0	0	0	0	0.02	0	0	0	0	0	0	0	0	0	0	0	0	0	0.03	0	0	0.01	0	0	0.002	0.004	0.004	0.001	0.001	0.002	0.003
Streptomyces malaysiensis	0	0	0.01	0	0	0	0	0	0.01	0.01	0	0	0	0	0	0	0.01	0	0	0	0	0	0.02	0	0	0	0	0	0	0	0	0	0	0	0	0	0.01	0	0	0	0	0	0.001	0.004	1e-05	1e-05	1e-05	1e-05	0.004
Cronobacter condimenti	0	0	0	0	0	0	0	0	0	0	0	0	0	0	0	0.01	0	0	0	0	0.06	0	0	0	0	0	0	0	0	0	0	0	0	0	0	0	0	0	0	0	0	0	0.002	0.002	0.002	0.001	0.004	0.001	0.002
Streptococcus dysgalactiae	0.01	0	0	0	0	0	0	0.02	0	0	0	0	0	0	0.01	0	0	0	0	0	0	0.01	0	0	0	0	0	0	0.01	0	0	0	0	0	0	0	0	0	0	0	0	0	0.003	0.001	0.004	0.001	0.001	0.001	0.001
Geobacillus sp. Y4.1MC1	0.01	0	0	0	0.01	0	0	0	0	0	0	0.01	0	0.01	0	0	0	0	0.01	0	0	0	0	0	0	0.01	0	0	0	0	0	0	0	0	0	0	0	0	0	0	0	0	1e-05	1e-05	1e-05	0.001	1e-05	1e-05	1e-05
Ureibacillus thermosphaericus	0.01	0	0	0	0	0	0	0.01	0	0	0	0	0	0.01	0.01	0	0	0.01	0	0	0	0.01	0	0	0	0	0	0	0	0	0	0	0	0	0	0	0	0	0	0	0	0	0.004	0.004	0.005	0.002	0.002	0.003	0.003
Anaerococcus prevotii	0.01	0	0	0.01	0	0	0	0	0	0	0	0	0	0.01	0	0	0	0.01	0	0	0	0	0	0	0	0	0	0	0.01	0	0	0	0	0	0	0	0	0	0	0.01	0	0	0.003	0.006	0.004	0.001	0.008	0.002	0.004
Streptomyces alfalfae	0.01	0	0	0	0	0	0	0.01	0	0	0	0	0	0	0.02	0.01	0	0	0	0	0	0.01	0	0	0	0	0	0	0	0	0	0	0	0	0	0	0	0	0	0	0	0	1e-05	1e-05	1e-05	1e-05	1e-05	1e-05	1e-05
Thermincola potens	0	0	0.01	0	0	0	0	0	0	0.01	0	0	0	0	0	0	0.01	0.01	0	0	0	0	0	0	0	0	0	0	0	0	0.01	0	0	0	0	0	0	0.01	0	0	0	0	0.003	0.01	0.005	0.003	0.004	0.001	0.01
Symbiobacterium thermophilum	0	0	0	0	0	0	0	0.01	0	0	0	0	0	0	0	0	0	0.01	0	0	0	0	0	0	0	0	0	0	0.01	0	0	0	0	0	0.01	0.01	0	0.01	0	0	0	0	0.009	0.005	0.002	0.003	0.002	0.002	0.008
Moorella thermoacetica	0	0	0.01	0	0	0	0	0	0	0.01	0	0	0	0	0	0	0.01	0.01	0	0	0	0	0	0	0	0	0	0	0	0	0.01	0	0	0	0	0	0	0.01	0	0	0	0	0.003	0.006	0.002	0.002	0.003	0.002	0.007
Streptococcus intermedius	0	0.01	0	0	0	0	0	0	0	0	0	0	0	0.01	0	0.01	0	0	0.01	0	0	0	0	0	0	0	0	0.01	0	0	0	0	0	0	0	0	0	0	0	0.01	0	0	0.003	0.005	0.005	0.003	0.002	0.002	0.004
Lactobacillus crispatus	0	0	0.01	0.01	0	0	0	0	0	0	0	0	0	0	0	0	0.01	0	0	0	0	0	0	0	0	0	0	0	0	0	0.01	0	0	0	0	0	0.01	0.01	0	0	0	0	0.002	0.006	0.002	0.001	0.002	0.002	0.005
Bacillus glycinifermentans	0	0	0	0	0	0	0	0	0	0	0.01	0	0	0	0	0	0	0.02	0	0.01	0	0	0	0	0	0	0	0	0	0	0	0	0	0.01	0	0	0	0	0.01	0	0	0	0.005	0.005	0.005	0.003	0.005	0.003	0.006
Bacillus clausii	0	0	0	0	0	0	0	0	0.01	0	0	0	0	0	0	0	0	0.01	0	0	0	0	0.01	0	0	0	0	0	0	0	0	0	0	0	0	0	0.02	0	0.01	0	0	0	0.006	0.007	0.004	0.002	0.004	0.003	0.006
Virgibacillus halodenitrificans	0	0	0.01	0	0	0	0	0	0.01	0	0	0	0	0	0	0	0	0	0	0	0	0	0.01	0	0	0	0	0	0	0	0	0	0	0	0	0	0.02	0	0.01	0	0	0	0.002	0.003	0.004	0.001	0.002	0.002	0.004
Paenibacillus sp. FW100M-2	0	0	0	0.01	0	0	0	0.01	0	0	0	0	0	0.01	0	0	0	0.01	0	0	0	0	0	0	0	0	0	0	0	0	0	0	0	0	0	0	0	0	0.01	0.01	0	0	0.005	0.005	0.005	0.005	0.005	0.004	0.005
Paenibacillus physcomitrellae	0	0	0	0.01	0	0	0	0	0	0	0	0	0	0	0	0	0.01	0.01	0	0.01	0	0	0	0	0	0	0	0	0	0	0	0	0	0	0	0	0	0	0.01	0.01	0	0	0.005	0.004	0.004	0.004	0.005	0.003	0.004
Sporolactobacillus terrae	0	0	0	0	0	0	0	0	0.01	0	0	0	0	0	0	0	0	0.01	0	0	0	0	0	0	0	0	0	0	0	0	0	0	0.01	0	0	0	0.02	0	0.01	0	0	0	0.004	0.012	0.004	0.003	0.006	0.002	0.009
Peptoniphilus sp. ING2-D1G	0	0	0	0	0	0	0	0	0	0	0	0	0	0.01	0	0	0	0.01	0	0	0	0	0	0	0.01	0	0	0.01	0	0	0	0.01	0	0	0	0	0	0	0.01	0	0	0	0.003	0.008	0.003	0.003	0.006	0.002	0.007
endosymbiont 'TC1' of Trimyema compressum	0	0	0.01	0	0	0	0	0	0	0.01	0	0	0	0	0	0	0.01	0	0	0	0	0	0	0	0	0	0	0.01	0	0	0.01	0	0	0	0	0	0	0.01	0	0	0	0	0.002	0.004	0.003	0.001	0.001	0.003	0.003
Arthrobacter sp. YN	0	0	0.01	0	0	0	0	0	0	0.01	0	0	0	0	0	0	0.01	0	0	0	0	0	0.01	0	0	0	0	0	0	0	0.01	0	0	0	0	0	0.01	0	0	0	0	0	0.002	0.004	0.001	0.001	0.001	0.001	0.005
Actinobacteria bacterium IMCC26077	0	0	0.01	0	0	0	0	0	0	0.01	0	0	0	0	0	0	0.01	0	0	0	0	0	0.01	0	0	0	0	0	0	0	0.01	0	0	0	0	0	0.01	0	0	0	0	0	0.001	0.007	1e-05	1e-05	0.001	1e-05	0.008
Nostoc sphaeroides	0	0	0.02	0	0	0	0	0	0	0.02	0	0	0	0	0	0	0.01	0	0	0	0	0	0	0	0	0	0	0	0	0	0.01	0	0	0	0	0	0	0	0	0	0	0	1e-05	0.001	1e-05	1e-05	0.001	0.001	0.001
Synechococcus sp. PCC 7502	0	0	0.01	0	0	0	0	0	0	0.01	0	0	0	0	0	0	0.01	0	0	0	0	0	0	0	0	0	0	0	0	0	0.01	0	0	0	0	0	0.01	0.01	0	0	0	0	1e-05	0.007	1e-05	0.001	1e-05	0.001	0.006
Brevefilum fermentans	0	0	0.01	0	0	0	0	0	0	0.01	0	0	0	0	0	0	0	0	0	0	0	0	0.01	0	0	0	0	0	0	0	0.01	0	0	0	0	0	0.01	0.01	0	0	0	0	0.001	0.009	0.001	1e-05	0.001	0.001	0.009
Chryseobacterium jeonii	0	0	0.01	0	0.01	0	0	0	0	0	0	0.01	0	0	0	0	0	0	0	0	0	0	0	0	0	0.01	0	0	0	0	0	0	0.01	0	0	0	0.01	0	0	0	0	0	0.003	0.007	0.003	0.004	0.003	0.001	0.006
Elizabethkingia sp. 2-6	0	0	0.01	0	0.01	0	0	0	0	0.01	0	0.01	0	0	0	0	0.01	0	0	0	0	0	0	0	0	0.01	0	0	0	0	0	0	0	0	0	0	0	0	0	0	0	0	0.001	0.002	0.001	0.002	0.002	1e-05	0.002
Cellulophaga lytica	0	0	0	0	0	0	0	0	0.01	0	0	0	0	0	0	0	0	0	0	0	0	0	0.01	0	0	0	0	0.01	0	0	0	0	0	0	0	0	0.02	0	0.01	0	0	0	0.005	0.006	0.003	0.003	0.005	0.001	0.005
Cellulophaga algicola	0	0	0.01	0	0	0	0	0	0	0.01	0	0	0	0	0	0	0.01	0	0	0	0	0	0	0	0	0	0	0	0	0	0.01	0	0	0	0	0	0.01	0.01	0	0	0	0	0.002	0.006	0.001	0.002	0.009	0.002	0.006
Gramella sp. SH35	0	0	0.01	0	0	0	0	0	0	0.01	0	0	0	0	0	0	0.01	0	0	0	0	0	0	0	0	0	0	0	0	0	0.01	0	0	0	0	0	0.01	0.01	0	0	0	0	0.002	0.005	0.002	0.004	0.003	0.001	0.004
Nonlabens sediminis	0	0	0.01	0	0	0	0	0	0.01	0.01	0	0	0	0	0	0	0.01	0	0	0	0	0	0.01	0	0	0	0	0	0	0	0	0	0	0	0	0	0.01	0	0	0	0	0	1e-05	0.002	1e-05	0.001	0.001	1e-05	0.002
Dokdonia donghaensis	0	0	0.01	0	0	0	0	0	0	0.01	0	0	0	0	0	0	0.01	0	0	0	0	0	0.01	0	0	0	0	0	0	0	0.01	0	0	0	0	0	0.01	0	0	0	0	0	0.001	0.008	0.001	1e-05	0.001	1e-05	0.008
Arenibacter algicola	0	0	0.01	0	0	0	0	0	0	0.01	0	0	0	0	0	0	0.01	0	0	0	0	0	0	0.01	0	0	0	0	0	0	0.01	0	0	0	0	0	0	0.01	0	0	0	0	0.003	0.002	0.002	0.003	0.002	0.001	0.002
Croceibacter atlanticus	0	0	0.01	0	0	0	0	0	0	0.01	0	0	0	0	0	0	0.01	0	0	0	0	0	0	0	0	0	0	0	0	0	0.01	0	0	0	0	0	0.01	0.01	0	0	0	0	0.001	0.009	0.002	0.001	1e-05	0.002	0.007
Aureitalea sp. RR4-38	0	0	0.01	0	0	0	0	0	0	0.01	0	0.01	0	0	0	0	0.01	0	0	0	0	0	0	0	0	0	0	0	0	0	0.01	0	0	0	0	0	0	0.01	0	0	0	0	0.001	0.006	0.001	0.002	0.006	1e-05	0.007
Owenweeksia hongkongensis	0	0	0.01	0	0	0	0	0	0	0.01	0	0	0	0	0	0	0.01	0	0	0	0	0	0	0	0	0	0	0	0	0	0.01	0	0	0	0	0	0.01	0.01	0	0	0	0	0.002	0.006	0.001	0.002	0.002	0.001	0.006
Hymenobacter nivis	0	0	0.01	0	0	0	0	0	0	0.01	0	0	0	0	0	0	0.01	0	0	0	0	0	0	0	0	0	0	0	0	0	0.01	0	0.01	0	0	0	0	0.01	0	0	0	0	0.003	0.013	0.002	0.003	0.004	0.001	0.014
Hymenobacter swuensis	0	0	0.01	0	0	0	0.01	0	0	0.01	0	0	0	0	0	0	0.01	0	0	0	0.01	0	0	0	0	0	0	0	0	0	0.01	0	0	0	0	0	0	0	0	0	0	0	0.003	0.006	0.001	0.002	0.004	0.001	0.007
Mucilaginibacter sp. BJC16-A31	0	0	0.01	0	0	0	0	0	0	0.01	0	0	0	0	0	0	0.01	0	0	0	0	0	0	0	0	0	0	0	0	0	0.01	0	0	0	0	0	0.01	0.01	0	0	0	0	0.002	0.011	0.001	0.006	0.003	0.001	0.012
Raoultella ornithinolytica	0	0	0.01	0	0	0	0	0	0	0.01	0	0	0	0.01	0	0.02	0	0	0	0	0	0	0	0	0	0	0	0	0	0.01	0	0	0	0	0	0	0	0	0	0	0	0	0.002	0.001	0.001	0.001	0.003	0.002	0.001
Yersinia pestis	0	0	0.02	0	0	0	0	0.01	0	0.01	0	0	0	0	0	0	0	0	0.01	0	0	0	0.01	0	0	0	0	0	0	0	0	0	0	0	0	0	0	0	0	0	0	0	0.001	0.001	1e-05	1e-05	1e-05	1e-05	1e-05
Pseudomonas brenneri	0	0	0.01	0	0	0	0	0	0.01	0.01	0	0	0	0	0	0	0	0	0	0	0	0	0.01	0	0	0	0	0	0	0	0.01	0	0	0	0	0	0.01	0	0	0	0	0	0.001	0.004	0.001	1e-05	0.001	1e-05	0.004
Pseudomonas extremaustralis	0	0	0.01	0	0	0	0	0	0.01	0.01	0	0	0	0	0	0	0	0	0	0	0	0	0.01	0	0	0	0	0	0	0	0.01	0	0	0	0	0	0.01	0	0	0	0	0	0.001	0.003	0.001	0.001	0.002	1e-05	0.004
Pseudomonas sp. LTJR-52	0	0	0.01	0	0	0	0	0	0	0.01	0	0	0	0	0	0	0.01	0	0	0	0	0	0.01	0	0	0	0	0	0	0	0.01	0	0	0	0	0	0.01	0	0	0	0	0	0.003	0.008	0.001	0.001	0.001	0.001	0.008
Pseudomonas kribbensis	0	0	0.01	0	0	0	0	0	0.01	0.01	0	0	0	0	0	0	0	0	0	0	0	0	0.01	0	0	0	0	0	0	0	0.01	0	0	0	0	0	0.01	0	0	0	0	0	0.001	0.007	1e-05	0.001	0.001	1e-05	0.007
Acinetobacter nosocomialis	0	0	0.01	0	0	0	0	0	0	0.01	0	0	0	0	0	0	0.01	0.01	0	0	0	0	0	0	0	0	0.01	0.01	0	0	0	0	0	0	0	0	0	0	0	0	0	0	0.002	0.003	0.001	0.002	0.006	0.002	0.002
Acinetobacter venetianus	0	0	0.01	0	0	0	0	0	0.01	0.01	0	0	0	0	0	0	0	0	0	0	0	0	0.01	0	0	0	0	0	0	0	0.01	0	0	0	0	0	0.01	0	0	0	0	0	0.001	0.008	0.001	0.002	0.002	0.001	0.009
Moraxella osloensis	0	0	0.01	0	0	0	0	0	0.01	0.01	0	0	0	0	0	0	0	0	0	0	0	0	0.01	0	0	0	0	0	0	0	0.01	0	0	0	0	0	0.01	0	0	0	0	0	0.001	0.004	0.001	0.001	0.001	1e-05	0.003
Marinobacter salinus	0	0	0.01	0	0	0	0	0	0	0.01	0	0	0	0	0	0	0.01	0	0	0	0	0	0.01	0	0	0	0	0	0	0	0.01	0	0	0	0	0	0.01	0	0	0	0	0	0.002	0.008	0.001	0.001	0.001	0.001	0.009
Vibrio alginolyticus	0	0	0.01	0	0.01	0	0	0	0	0.01	0	0.01	0	0	0	0	0.01	0	0	0	0	0	0	0	0	0.01	0	0	0	0	0	0	0	0	0	0	0	0	0	0	0	0	0.002	0.001	1e-05	0.001	0.007	0.001	0.001
Vibrio tritonius	0	0	0.01	0	0	0	0	0	0	0.01	0	0	0	0	0	0	0.01	0	0	0	0	0	0.01	0	0	0	0	0	0	0	0.01	0	0	0	0	0	0.01	0	0	0	0	0	0.001	0.008	0.001	0.001	0.001	0.001	0.008
Vibrio hyugaensis	0	0	0.01	0	0	0	0	0	0.01	0.01	0	0	0	0	0	0	0.01	0	0	0	0	0	0.01	0	0	0	0	0	0	0	0	0	0	0	0	0	0.01	0	0	0	0	0	0.002	0.004	1e-05	1e-05	0.003	1e-05	0.002
Marinobacterium aestuarii	0	0	0	0	0	0	0	0	0.01	0	0	0	0	0	0	0	0.01	0	0	0	0	0	0.01	0	0	0	0	0	0	0	0	0	0	0	0	0	0.02	0.01	0	0	0	0	0.002	0.003	0.003	0.001	0.004	0.001	0.003
Thioalkalivibrio nitratireducens	0	0	0.01	0	0	0	0	0	0	0.01	0	0	0	0	0	0	0.01	0	0	0	0	0	0.01	0	0	0	0	0	0	0	0.01	0	0	0	0	0	0.01	0	0	0	0	0	0.002	0.008	0.001	0.001	0.001	0.001	0.008
Aeromonas rivipollensis	0	0	0.01	0	0	0	0	0	0.01	0.01	0	0	0	0	0	0	0	0	0	0	0	0	0.01	0	0	0	0	0	0	0	0.01	0	0	0	0	0	0.01	0	0	0	0	0	0.001	0.003	1e-05	1e-05	1e-05	1e-05	0.004
Oceanisphaera profunda	0	0	0.01	0	0	0	0	0	0	0.01	0	0	0	0	0	0	0.01	0	0	0	0	0	0	0	0	0	0	0	0.01	0	0.01	0	0	0	0	0	0	0.01	0	0	0	0	0.001	0.007	1e-05	1e-05	1e-05	0.001	0.006
Desulfocurvibacter africanus	0	0	0.01	0	0	0	0	0	0	0.01	0	0	0	0	0	0	0.01	0	0	0	0	0	0	0	0	0	0	0	0	0	0.01	0	0	0	0	0	0.01	0.01	0	0	0	0	0.003	0.01	0.002	0.002	0.001	0.002	0.01
Arcobacter cryaerophilus	0	0	0	0	0	0	0	0	0	0.01	0	0	0	0	0	0	0.01	0	0	0	0	0	0.01	0	0	0	0	0	0	0	0.01	0	0	0	0	0	0.01	0.01	0	0	0	0	0.002	0.01	0.004	0.001	0.001	0.002	0.009
Sinorhizobium medicae	0	0	0	0	0	0	0	0	0.01	0.01	0	0	0	0	0	0	0.01	0	0	0	0	0	0.01	0	0	0	0	0	0	0	0.01	0	0	0	0	0	0.01	0	0	0	0	0	0.001	0.006	1e-05	0.001	1e-05	1e-05	0.006
Bradyrhizobium lablabi	0	0	0.01	0	0	0	0	0	0	0.01	0	0	0	0	0	0	0.01	0	0	0.01	0	0.01	0	0.01	0	0	0	0	0	0	0	0	0	0	0	0	0	0	0	0	0	0	0.002	0.003	0.001	0.001	0.001	0.001	0.003
Bartonella sp. CDC_skunk	0	0	0.01	0	0	0	0	0	0	0.02	0	0	0	0	0	0	0.01	0	0	0	0	0	0	0.01	0	0	0	0	0	0	0.01	0	0	0	0	0	0	0	0	0	0	0	1e-05	0.003	1e-05	1e-05	1e-05	1e-05	0.003
Brevundimonas naejangsanensis	0	0	0	0	0	0	0	0	0	0	0	0	0	0.01	0	0.01	0	0	0	0.01	0.01	0	0	0	0	0	0	0	0	0	0	0.01	0	0	0	0	0	0	0	0	0	0.01	0.002	0.003	0.001	0.002	0.001	0.001	0.003
Lautropia mirabilis	0	0	0	0	0	0	0	0	0.02	0	0	0	0	0	0	0	0	0	0	0	0	0	0.01	0	0	0.01	0	0	0	0.01	0	0	0	0	0	0	0.01	0	0	0	0	0	0.002	0.004	0.006	0.002	0.002	0.001	0.005
Verrucomicrobia bacterium S94	0	0	0.01	0	0	0	0	0	0	0.01	0	0	0	0	0	0	0.01	0	0	0	0	0	0	0.01	0	0	0	0	0	0	0.01	0	0	0	0	0	0	0.01	0	0	0	0	0.005	0.008	0.003	0.003	0.005	0.002	0.008
Planctomyces sp. SH-PL62	0	0	0.01	0	0	0	0	0	0.01	0.01	0	0	0	0	0	0	0	0	0	0	0	0	0.01	0	0	0	0	0	0	0	0.01	0	0	0	0	0	0.01	0	0	0	0	0	0.005	0.003	0.002	0.001	0.001	0.001	0.004
Thermocrinis albus	0	0	0.01	0	0	0	0	0	0	0.01	0	0	0	0	0	0	0.01	0	0	0	0	0	0.01	0	0	0	0	0	0	0	0.01	0	0	0	0	0	0.01	0	0	0	0	0	1e-05	0.003	1e-05	0.001	1e-05	0.001	0.003
Luteitalea pratensis	0	0	0	0	0	0	0	0	0.01	0.01	0	0	0	0	0	0	0	0	0	0	0	0	0.01	0	0	0	0	0	0	0	0.01	0	0	0	0	0	0.01	0.01	0	0	0	0	0.002	0.002	0.001	0.003	0.001	0.002	0.002
Streptococcus sp. 'group B'	0	0	0	0	0.01	0	0	0	0	0	0	0.03	0.01	0	0	0	0	0	0.01	0	0	0	0	0	0	0	0	0	0	0	0	0	0	0	0	0	0	0	0	0	0	0	1e-05	1e-05	1e-05	1e-05	1e-05	1e-05	1e-05
Enterococcus sp. FDAARGOS_375	0.01	0	0	0	0	0	0	0.01	0	0	0	0	0	0	0	0	0	0.01	0	0	0	0	0	0	0	0	0	0	0.01	0.02	0	0	0	0	0	0	0	0	0	0	0	0	0.003	0.004	0.002	0.001	0.003	0.002	0.004
Enterococcus sp. HSIEG1	0.01	0	0	0	0	0	0.01	0.01	0	0	0	0	0	0.01	0	0	0	0	0	0	0	0	0	0	0	0	0	0	0	0.02	0	0	0	0	0	0	0	0	0	0	0	0	0.003	0.001	0.001	1e-05	1e-05	0.001	0.001
Actinoplanes derwentensis	0	0	0	0	0	0	0	0.01	0.01	0	0	0	0	0	0	0	0	0.01	0	0	0	0	0.01	0	0	0	0	0	0	0	0	0	0	0	0	0	0.02	0	0	0	0	0	0.003	0.003	0.002	0.002	0.002	0.003	0.004
Geminocystis sp. NIES-3709	0	0	0	0	0	0	0	0	0.01	0	0	0	0	0	0	0	0	0	0	0	0	0	0.01	0	0	0	0	0	0	0	0	0	0	0	0	0	0.04	0	0	0	0	0	0.001	0.008	0.002	0.001	0.001	0.002	0.006
Flavobacterium sp. 140616W15	0	0	0	0	0.01	0	0	0	0.01	0	0	0.01	0	0	0	0	0	0	0	0	0	0	0.01	0	0	0	0	0	0	0	0	0	0	0	0	0	0.02	0	0	0	0	0	0.002	0.003	0.005	0.004	0.004	0.002	0.003
Citrobacter freundii complex sp. CFNIH4	0	0	0	0	0	0	0	0	0	0	0	0	0	0	0	0.06	0	0	0	0	0	0	0	0	0	0	0	0	0	0	0	0	0	0	0	0	0	0	0	0	0	0	0.001	1e-05	1e-05	1e-05	1e-05	1e-05	1e-05
Cronobacter turicensis	0	0	0	0	0	0	0	0	0	0	0	0	0	0	0	0	0	0	0	0	0.06	0	0	0	0	0	0	0	0	0	0	0	0	0	0	0	0	0	0	0	0	0	0.001	0.002	1e-05	1e-05	0.001	1e-05	0.001
Alteromonas mediterranea	0	0	0.01	0	0	0	0	0	0.01	0	0	0	0	0	0	0	0	0.01	0	0	0	0	0.01	0	0	0	0	0	0	0	0	0	0	0	0	0	0.02	0	0	0	0	0	0.003	0.002	0.002	0.002	0.004	0.001	0.002
Vibrio alfacsensis	0	0	0	0	0	0	0	0	0.01	0.01	0	0	0	0	0	0	0	0	0	0	0	0	0.01	0	0	0	0	0	0	0	0.01	0	0	0	0	0	0.02	0	0	0	0	0	0.001	0.003	0.001	0.001	1e-05	1e-05	0.003
Halomonas beimenensis	0	0	0	0	0	0	0	0	0.01	0	0	0	0	0	0	0	0	0	0	0	0	0	0.02	0	0	0	0	0	0	0	0	0	0	0	0	0	0.03	0	0	0	0	0	0.002	0.005	0.001	0.001	1e-05	1e-05	0.007
Gallaecimonas mangrovi	0	0	0	0	0	0	0	0	0.01	0.01	0	0	0	0	0	0	0	0	0	0	0	0	0.01	0	0	0	0	0	0	0	0.01	0	0	0	0	0	0.02	0	0	0	0	0	0.001	0.004	0.001	0.001	0.001	0.001	0.005
Rhodobiaceae bacterium	0	0	0	0	0	0	0	0	0.01	0.01	0	0	0	0	0	0	0	0	0	0	0	0	0.01	0	0	0	0	0	0	0	0.01	0	0	0	0	0	0.02	0	0	0	0	0	0.001	0.01	1e-05	0.001	0.003	1e-05	0.01
Tabrizicola sp. K13M18	0	0	0	0	0	0	0	0	0.01	0.01	0	0	0	0	0	0	0	0	0	0	0	0	0.01	0	0	0	0	0	0	0	0.01	0	0	0	0	0	0.02	0	0	0	0	0	0.001	0.008	0.001	0.001	1e-05	0.001	0.009
Anaplasma phagocytophilum	0	0	0	0	0	0	0	0	0.01	0.01	0	0	0	0	0	0	0	0	0	0	0	0	0.01	0	0	0	0	0	0	0	0	0	0	0	0	0	0.03	0	0	0	0	0	1e-05	0.009	1e-05	1e-05	0.001	1e-05	0.006
Burkholderia oklahomensis	0	0	0	0	0	0	0	0	0.01	0.01	0	0	0	0	0	0	0	0	0	0	0	0	0.01	0	0	0	0	0	0	0	0.01	0	0	0	0	0	0.02	0	0	0	0	0	0.001	0.004	1e-05	0.001	0.001	1e-05	0.004
Acidovorax sp. 1608163	0	0	0.01	0	0	0	0	0	0.01	0	0	0	0	0	0	0	0	0	0	0	0	0	0.01	0	0	0	0	0	0	0	0.01	0	0	0	0	0	0.02	0	0	0	0	0	0.002	0.01	0.001	0.001	0.001	0.001	0.01
Herbaspirillum sp. meg3	0	0	0	0	0	0	0	0	0.01	0.01	0	0	0	0	0	0	0	0	0	0	0	0	0.01	0	0	0	0	0	0	0	0.01	0	0	0	0	0	0.02	0	0	0	0	0	0.002	0.003	0.001	0.001	0.001	0.001	0.004
Neisseria subflava	0	0	0	0	0	0	0.01	0	0.01	0	0	0	0	0	0	0	0	0	0	0	0.01	0	0.01	0	0	0.02	0	0	0	0	0	0	0	0	0	0	0	0	0	0	0	0	0.001	0.003	0.003	0.001	0.002	0.017	0.003
Simonsiella muelleri	0	0	0	0	0	0	0	0	0.01	0.01	0	0	0	0	0	0	0	0	0	0	0	0	0.01	0	0	0	0	0	0	0	0.01	0	0	0	0	0	0.02	0	0	0	0	0	1e-05	0.002	1e-05	0.001	1e-05	1e-05	0.003
Fastidiosipila sanguinis	0.01	0	0	0	0	0	0	0	0	0	0	0	0	0.01	0	0	0	0	0	0	0	0.01	0	0	0	0	0	0	0	0	0	0	0	0	0	0	0.01	0.01	0	0	0	0	0.007	0.014	0.005	0.002	0.003	0.003	0.01
Halanaerobium praevalens	0.01	0	0	0	0	0	0	0.01	0	0	0	0	0	0	0	0	0	0	0	0	0	0	0	0	0	0	0	0	0.01	0.01	0	0	0	0	0	0	0.01	0	0	0	0	0	0.003	0.004	0.005	0.002	0.003	0.002	0.004
Selenomonas sp. oral taxon 136	0.01	0	0	0	0	0	0	0.01	0.01	0	0	0	0	0	0	0	0	0.01	0	0	0	0.01	0	0	0	0	0	0	0	0	0	0	0	0	0	0	0	0	0	0	0	0	0.003	0.008	0.003	0.001	0.002	0.002	0.014
Carnobacterium divergens	0.01	0	0	0	0	0	0	0	0	0	0	0	0	0.01	0	0	0	0	0	0	0	0	0	0	0	0	0	0.01	0.01	0.01	0	0	0	0	0	0	0	0	0	0	0	0	0.002	0.005	0.005	0.003	0.003	0.001	0.004
Chryseobacterium sp. F5649	0.01	0	0	0	0.01	0	0	0.01	0	0	0	0.01	0	0	0	0	0	0	0	0	0	0.01	0	0	0	0	0	0	0	0	0	0	0	0	0	0	0	0	0	0	0	0	0.001	0.003	0.002	0.001	0.001	0.001	0.003
Ignavibacterium album	0.01	0	0	0	0	0	0	0	0	0	0	0.01	0	0	0	0	0	0.01	0	0	0	0	0	0	0	0.01	0	0	0	0	0	0	0.01	0	0	0	0	0	0	0	0	0	0.002	0.008	0.003	0.004	0.006	0.002	0.006
Brachyspira hyodysenteriae	0.01	0	0.01	0	0	0	0	0.01	0	0	0	0	0	0	0	0	0.01	0.01	0	0	0	0	0	0	0	0	0	0	0	0	0	0	0	0	0	0	0	0	0	0	0	0	0.004	0.006	0.005	0.002	0.003	0.001	0.004
Streptococcus milleri	0	0	0.01	0	0	0	0	0	0	0	0	0	0	0	0	0	0.01	0	0	0	0	0	0	0.01	0	0	0	0	0	0	0.01	0	0	0	0	0	0	0.01	0	0	0	0	1e-05	0.001	0.006	0.002	0.001	0.001	0.001
Lactobacillus paracollinoides	0	0	0	0	0	0	0	0	0.01	0	0	0	0	0	0	0	0	0	0	0	0	0	0.01	0	0	0	0	0	0	0	0.01	0	0	0	0	0	0.02	0	0	0	0	0	0.002	0.007	0.003	0.001	0.003	0.001	0.008
Leuconostoc lactis	0	0	0	0	0	0	0	0	0	0	0	0	0	0	0	0	0	0	0	0	0	0	0.02	0	0	0	0	0	0	0	0	0	0	0	0	0	0.03	0	0	0	0	0	0.002	0.002	0.006	1e-05	1e-05	1e-05	0.001
Bacillus anthracis	0	0	0	0	0	0	0	0	0	0	0	0	0	0.02	0	0	0	0.01	0	0	0	0.01	0	0.01	0	0	0	0	0	0	0	0	0	0	0	0	0	0	0	0	0	0	1e-05	0.004	0.002	1e-05	0.001	1e-05	0.003
Bacillus atrophaeus	0	0	0	0.01	0	0	0	0	0.01	0	0	0	0	0	0	0	0	0.01	0.01	0.01	0	0	0	0	0	0	0	0	0	0	0	0	0	0	0	0	0	0	0	0	0	0	0.002	0.003	0.002	0.001	0.002	1e-05	0.002
Bacillus foraminis	0	0	0	0.01	0	0	0	0	0	0	0	0	0	0.01	0	0	0	0.01	0	0	0	0	0	0	0	0	0	0.01	0	0	0	0	0	0	0	0	0	0	0.01	0	0	0	0.003	0.009	0.006	0.003	0.004	0.004	0.008
Bacillus sp. FJAT-22090	0	0	0	0	0	0	0	0	0.01	0	0	0	0	0	0	0	0	0	0	0	0	0	0.01	0	0	0	0	0	0.01	0	0	0	0	0	0	0	0.02	0	0	0	0	0	0.003	0.005	0.005	0.002	0.005	0.004	0.004
Bacillus sp. 1NLA3E	0	0	0.01	0	0	0	0	0	0	0.01	0	0	0	0.01	0	0	0	0	0	0	0	0	0	0	0	0	0	0.01	0	0	0.01	0	0	0	0	0	0	0	0	0	0	0	0.003	0.005	0.004	0.001	0.005	0.002	0.005
Bacillus muralis	0	0	0.01	0	0	0	0	0	0	0	0	0	0	0.01	0	0	0	0.01	0	0	0	0	0	0	0	0	0	0	0	0	0	0	0	0	0	0	0	0	0.01	0.01	0	0	0.004	0.006	0.004	0.003	0.003	0.002	0.005
Bacillus sp. FJAT-42376	0	0	0	0.01	0	0	0	0	0	0	0	0	0	0.01	0	0	0	0.01	0	0	0	0	0	0	0	0	0	0	0	0	0	0	0	0	0	0	0	0	0.01	0.01	0	0	0.005	0.008	0.003	0.004	0.004	0.003	0.006
Aeribacillus pallidus	0	0	0	0.01	0	0	0	0.01	0	0	0	0	0	0.01	0	0	0	0.01	0	0	0	0	0	0	0	0	0	0	0	0	0	0	0	0	0	0	0	0	0.01	0	0	0	0.002	0.005	0.004	0.001	0.002	0.002	0.004
Paenibacillus crassostreae	0	0	0.01	0	0	0	0	0	0	0.01	0	0	0	0.01	0	0	0.01	0	0	0	0	0	0	0	0	0	0	0	0	0	0.01	0	0	0	0	0	0	0	0	0	0	0	0.003	0.004	0.005	0.002	0.002	0.002	0.003
Paenibacillus sp. IHB B 3084	0	0	0	0	0	0	0	0	0	0.01	0	0	0	0	0	0	0	0.01	0	0	0	0	0.01	0	0	0	0	0	0	0	0.01	0	0	0	0	0	0.01	0	0	0	0	0	0.002	0.006	0.003	0.002	0.002	0.002	0.007
Corynebacterium flavescens	0	0	0.01	0	0	0	0	0	0	0.01	0	0	0	0	0	0	0	0	0	0	0	0	0.01	0	0	0	0	0	0	0	0.01	0	0	0	0	0	0.01	0	0	0	0	0	0.001	0.003	0.001	1e-05	0.001	0.001	0.004
Corynebacterium renale	0	0	0	0	0	0	0	0	0.01	0	0	0	0	0	0	0	0	0	0	0	0	0	0.01	0	0	0	0	0	0	0	0.01	0	0	0	0	0	0.02	0	0	0	0	0	1e-05	0.009	1e-05	0.001	0.001	1e-05	0.01
Corynebacterium kroppenstedtii	0	0	0	0	0	0	0	0	0.01	0	0	0	0	0	0	0	0	0	0	0	0	0	0.01	0	0	0	0	0	0	0	0.01	0	0	0	0	0	0.02	0	0	0	0	0	1e-05	0.007	1e-05	1e-05	1e-05	1e-05	0.007
Corynebacterium lactis	0	0	0.01	0	0	0	0	0	0	0.01	0	0	0	0	0	0	0.01	0	0	0	0	0	0	0	0	0	0	0	0	0	0.01	0	0	0	0	0	0.01	0	0	0	0	0	0.002	0.002	0.001	1e-05	0.001	1e-05	0.003
Arthrobacter sp. ZXY-2	0	0	0.01	0	0	0	0	0	0.01	0.01	0	0	0	0	0	0	0.01	0	0	0	0	0	0.01	0	0	0	0	0	0	0	0	0	0	0	0	0	0	0	0	0	0	0	1e-05	0.001	1e-05	1e-05	1e-05	1e-05	0.001
Atopobium parvulum	0	0	0.01	0	0	0	0	0	0	0.01	0	0	0	0	0	0	0.01	0	0	0	0	0	0	0	0	0	0	0	0	0	0.01	0	0	0	0	0	0	0	0	0.01	0	0	0.004	0.005	0.005	0.003	0.003	0.003	0.004
Synechococcus sp. WH 8103	0	0	0.01	0	0	0	0	0	0	0.01	0	0	0	0	0	0	0.01	0	0	0	0	0	0	0.01	0	0	0	0	0	0	0.01	0	0	0	0	0	0	0	0	0	0	0	1e-05	0.002	1e-05	1e-05	1e-05	1e-05	0.003
Caldilinea aerophila	0	0	0.01	0	0	0	0	0	0	0.01	0	0	0	0	0	0	0.01	0	0	0	0	0	0	0	0	0	0	0	0	0	0.01	0	0	0	0	0	0	0.01	0	0	0	0	0.004	0.007	0.002	0.002	0.002	0.001	0.008
Chryseobacterium sp. 6424	0	0	0	0	0.01	0	0	0	0	0	0	0.01	0	0	0	0	0	0	0	0	0	0	0	0	0	0.01	0	0	0	0	0	0	0.01	0	0	0	0.01	0	0	0	0	0	0.001	0.004	0.001	0.004	0.002	0.001	0.005
Flavobacterium crassostreae	0	0	0.01	0	0	0	0	0	0	0.01	0	0	0	0	0	0	0.01	0	0	0	0	0	0	0	0	0	0	0	0	0	0.01	0	0	0	0	0	0	0.01	0	0	0	0	0.001	0.003	0.001	0.002	0.002	0.001	0.002
Elizabethkingia ursingii	0	0	0.01	0	0	0	0.01	0	0	0.01	0	0	0	0	0	0	0.01	0	0	0	0	0	0	0	0	0	0	0	0	0	0.01	0	0	0	0	0	0	0	0	0	0	0	0.001	0.002	0.003	0.004	0.004	0.001	0.002
Elizabethkingia bruuniana	0	0	0	0	0.01	0	0	0	0	0	0	0.01	0	0	0	0	0	0	0.01	0	0	0	0	0.01	0	0.01	0	0	0	0	0	0	0	0	0	0	0	0	0	0	0	0	0.001	0.001	0.001	0.001	1e-05	1e-05	0.001
Tenacibaculum todarodis	0	0	0.01	0	0	0	0	0	0	0.01	0	0	0	0	0	0	0.01	0.01	0	0	0	0	0	0	0	0	0	0	0	0	0.01	0	0	0	0	0	0	0	0	0	0	0	0.002	0.006	0.003	0.002	0.001	0.001	0.005
Nonlabens sp. MJ115	0	0	0.01	0	0	0	0	0	0	0.01	0	0	0	0	0	0	0.01	0	0	0	0	0	0	0	0	0	0	0	0	0	0.01	0	0	0	0	0	0.01	0	0	0	0	0	0.001	0.006	0.001	0.002	0.001	0.001	0.005
Seonamhaeicola sp. S2-3	0	0	0	0	0	0	0	0	0.01	0	0	0	0	0	0	0	0	0	0	0	0	0	0.01	0	0	0	0	0	0	0	0.01	0	0	0	0	0	0.02	0	0	0	0	0	0.002	0.009	0.002	0.003	0.002	0.001	0.006
Cytophaga hutchinsonii	0	0	0	0	0.01	0	0	0	0	0	0	0.01	0	0	0	0	0.01	0	0	0	0	0	0	0	0	0.01	0	0	0	0	0	0	0.01	0	0	0	0	0	0	0	0	0	0.003	0.011	0.003	0.003	0.006	0.001	0.01
Pseudarcicella sp. HME7025	0	0	0	0	0.01	0	0	0	0	0	0	0.01	0	0	0	0	0	0	0	0	0	0	0	0	0	0.01	0	0	0	0	0	0	0.01	0	0	0	0.01	0	0	0	0	0	0.002	0.004	0.002	0.003	0.007	0.001	0.004
Cyclobacterium marinum	0	0	0.01	0	0	0	0	0	0	0.01	0	0	0	0	0	0	0.01	0	0	0	0	0	0	0	0	0	0	0	0	0	0.01	0	0	0	0	0	0	0.01	0	0	0	0	0.003	0.006	0.002	0.003	0.004	0.003	0.005
Bernardetia litoralis	0	0	0	0	0	0	0	0	0.01	0	0	0	0	0	0	0	0	0	0	0	0	0	0.01	0	0	0	0	0	0.01	0	0	0	0	0	0	0	0.02	0	0	0	0	0	0.002	0.011	0.005	0.004	0.004	0.002	0.008
Salinibacter ruber	0	0	0.01	0	0	0	0	0	0	0.01	0	0	0	0	0	0	0.01	0	0	0	0	0	0	0	0	0	0	0	0	0	0.01	0	0	0	0	0	0	0.01	0	0	0	0	0.005	0.004	0.001	0.002	0.002	0.002	0.005
Pelodictyon phaeoclathratiforme	0	0	0.01	0	0	0	0	0	0	0.01	0	0	0	0	0	0	0.01	0	0	0	0	0	0	0	0	0	0	0	0	0	0.01	0	0	0	0	0	0	0.01	0	0	0	0	0.002	0.007	0.001	0.001	0.001	0.001	0.006
Enterobacter sp. FY-07	0	0	0.01	0	0	0	0	0	0	0.01	0	0	0	0	0	0	0.01	0	0	0	0	0	0	0	0	0	0	0	0	0	0.01	0	0	0	0	0	0	0.01	0	0	0	0	0.001	0.001	0.001	0.001	0.007	0.001	0.002
Citrobacter koseri	0	0	0	0	0	0	0.03	0	0	0	0	0	0	0	0	0.02	0	0	0	0	0	0	0	0	0	0	0	0	0	0	0	0	0	0	0	0	0	0	0	0	0	0	0.001	1e-05	1e-05	0.001	1e-05	0.001	1e-05
Candidatus Hoaglandella endobia	0	0	0	0	0	0	0	0	0.01	0	0	0	0	0	0	0	0	0	0	0	0	0	0.01	0	0	0	0	0	0	0	0.01	0	0	0	0	0	0.02	0	0	0	0	0	1e-05	0.005	1e-05	0.001	0.001	1e-05	0.005
Pseudomonas amygdali	0	0	0	0	0	0	0	0	0.01	0.01	0	0	0	0	0	0	0	0	0	0	0	0	0.01	0	0	0	0	0	0	0	0.01	0	0	0	0	0	0.01	0	0	0	0	0	1e-05	0.003	1e-05	1e-05	1e-05	1e-05	0.002
Pseudomonas arsenicoxydans	0	0	0	0	0	0	0	0	0.01	0.01	0	0	0	0	0	0	0	0	0	0	0	0	0.01	0	0	0	0	0	0	0	0.01	0	0	0	0	0	0.01	0	0	0	0	0	1e-05	0.007	0.001	1e-05	1e-05	1e-05	0.006
Salinimonas lutimaris	0	0	0.01	0	0	0	0	0	0	0.01	0	0	0	0	0	0	0.01	0	0	0	0	0	0	0	0	0	0	0	0	0	0.01	0	0	0	0	0	0.01	0	0	0	0	0	0.002	0.006	0.001	0.001	0.003	0.001	0.005
Halomonas sp. JS92-SW72	0	0	0.01	0	0	0	0	0	0	0.01	0	0	0	0	0	0	0	0	0	0	0	0	0.01	0	0	0	0	0	0	0	0.01	0	0	0	0	0	0.01	0	0	0	0	0	0.002	0.006	0.002	0.002	0.001	0.001	0.007
Halomonas sp. GT	0	0	0.01	0	0	0	0	0	0	0.01	0	0	0	0	0	0	0.01	0	0	0	0	0	0	0	0	0	0	0	0	0	0.01	0	0	0	0	0	0	0.01	0	0	0	0	1e-05	0.006	0.001	1e-05	0.001	0.001	0.006
Halomonas sp. SF2003	0	0	0.01	0	0	0	0	0	0.01	0.01	0	0	0	0	0	0	0	0	0	0	0	0	0.01	0	0	0	0	0	0	0	0	0	0	0	0	0	0.01	0	0	0	0	0	0.002	0.005	1e-05	0.001	0.001	1e-05	0.006
Kushneria marisflavi	0	0	0.01	0	0	0	0	0	0	0.01	0	0	0	0	0	0	0	0	0	0	0	0	0.01	0	0	0	0	0	0	0	0.01	0	0	0	0	0	0.01	0	0	0	0	0	0.001	0.001	0.001	0.001	0.001	1e-05	0.001
Bacterioplanes sanyensis	0	0	0	0	0	0	0	0	0.01	0	0	0	0	0	0	0	0	0	0	0	0	0	0.01	0	0	0	0	0	0	0	0	0	0	0	0	0	0.03	0	0	0	0	0	0.001	0.003	0.001	1e-05	0.001	1e-05	0.004
Hahella chejuensis	0	0	0	0	0	0	0	0	0	0.01	0	0	0	0	0	0	0	0	0	0	0	0	0.01	0	0	0	0	0	0	0	0.01	0	0	0	0	0	0.02	0	0	0	0	0	0.001	0.005	0.001	0.002	0.001	1e-05	0.006
Oleiphilus messinensis	0	0	0.01	0	0	0	0	0	0	0.01	0	0	0	0	0	0	0.01	0	0	0	0	0	0	0	0	0	0	0	0	0	0.01	0	0	0	0	0	0.01	0	0	0	0	0	0.001	0.003	0.001	0.001	1e-05	1e-05	0.003
Legionella oakridgensis	0	0	0	0	0	0	0	0	0.01	0	0	0	0	0	0	0	0	0	0	0	0	0	0.01	0	0	0	0	0	0	0	0	0	0	0	0	0	0.03	0	0	0	0	0	1e-05	0.007	0.001	1e-05	1e-05	0.001	0.007
Gammaproteobacteria bacterium DM2	0	0	0.01	0	0	0	0	0	0	0.01	0	0	0	0	0	0	0.01	0	0	0	0	0	0	0	0	0	0	0	0	0	0.01	0	0	0	0	0	0	0.01	0	0	0	0	0.001	0.007	0.001	0.001	0.002	1e-05	0.006
Microbulbifer agarilyticus	0	0	0	0	0	0	0	0	0.01	0.01	0	0	0	0	0	0	0	0	0	0	0	0	0.01	0	0	0	0	0	0	0	0	0	0	0	0	0	0.02	0	0	0	0	0	0.003	0.005	1e-05	1e-05	1e-05	0.001	0.006
Methylomonas sp. LW13	0	0	0	0	0	0	0	0	0.01	0	0	0	0	0	0	0	0	0	0	0	0	0	0.01	0	0	0	0	0	0	0	0.01	0	0	0	0	0	0.02	0	0	0	0	0	0.002	0.007	1e-05	0.001	1e-05	1e-05	0.008
Methylomonas methanica	0	0	0	0	0	0	0	0	0.01	0	0	0	0	0	0	0	0	0	0	0	0	0	0.01	0	0	0	0	0	0	0	0.01	0	0	0	0	0	0.02	0	0	0	0	0	0.002	0.003	1e-05	0.002	0.002	0.001	0.003
Geobacter sp. DSM 9736	0	0	0.01	0	0	0	0	0	0	0.01	0	0	0	0	0	0	0.01	0	0	0	0	0	0	0	0	0	0	0	0	0	0.01	0	0	0	0	0	0.01	0	0	0	0	0	0.002	0.004	0.001	0.002	0.002	0.001	0.004
Campylobacter sputorum	0	0	0.01	0	0	0	0	0	0	0.01	0	0	0	0	0	0	0.01	0	0	0	0	0	0	0	0	0	0	0	0	0	0.01	0	0	0	0	0	0	0.01	0	0	0	0	0.003	0.006	0.002	0.001	0.002	0.003	0.005
Arcobacter anaerophilus	0	0	0	0	0	0	0	0	0.01	0	0	0	0	0	0	0	0	0	0	0	0	0	0.01	0	0	0	0	0	0	0	0	0	0	0	0	0	0.03	0	0	0	0	0	0.002	0.005	0.002	0.001	0.002	0.001	0.004
Sinorhizobium meliloti	0	0	0.01	0	0	0	0	0	0	0.01	0	0	0	0	0	0	0.01	0	0	0	0	0	0	0	0	0	0	0	0	0	0.01	0	0	0	0	0	0	0.01	0	0	0	0	0.005	0.004	0.002	0.004	0.004	0.001	0.005
Bradyrhizobium sp. ORS 285	0	0	0.01	0	0	0	0	0	0	0.01	0	0	0	0	0	0	0.01	0	0	0	0	0	0	0	0	0	0	0	0	0	0.01	0	0	0	0	0	0	0.01	0	0	0	0	0.002	0.004	0.001	0.001	0.001	0.001	0.005
Rhodobacteraceae bacterium D4M1	0	0	0	0	0	0	0	0	0.01	0.01	0	0	0	0	0	0	0	0	0	0	0	0	0.01	0	0	0	0	0	0	0	0	0	0	0	0	0	0.02	0	0	0	0	0	0.002	0.004	0.002	0.002	0.002	0.001	0.006
Acetobacteraceae bacterium	0	0	0	0	0	0	0	0	0.01	0	0	0	0	0	0	0	0	0.01	0	0	0	0	0.01	0	0	0	0	0	0	0	0	0	0	0	0	0	0.02	0	0	0	0	0	0.004	0.005	0.002	0.001	0.004	0.001	0.004
Swingsia samuiensis	0	0	0.01	0	0	0	0	0	0	0.01	0	0	0	0	0	0	0.01	0	0	0	0	0	0	0	0	0	0	0	0	0	0.01	0	0	0	0	0	0.01	0	0	0	0	0	0.001	0.001	1e-05	0.001	1e-05	1e-05	0.001
Caulobacter sp. K31	0	0	0.01	0	0	0	0	0	0	0.01	0	0	0	0	0	0	0	0	0	0	0	0	0.01	0	0	0	0	0	0	0	0.01	0	0	0	0	0	0.01	0	0	0	0	0	0.002	0.003	0.001	0.001	1e-05	0.001	0.003
Cupriavidus oxalaticus	0	0	0	0	0	0	0	0.01	0.01	0	0	0	0	0	0	0	0	0	0	0	0	0	0.01	0	0	0	0	0	0	0	0	0	0	0	0	0	0.02	0	0	0	0	0	0.003	0.007	0.001	0.002	0.004	0.001	0.008
Bordetella genomosp. 8	0	0	0	0	0	0	0	0	0.01	0.01	0	0	0	0	0	0	0	0	0	0	0	0	0.01	0	0	0	0	0	0	0	0.01	0	0	0	0	0	0.01	0	0	0	0	0	0.003	0.004	0.003	0.002	0.001	0.001	0.005
Achromobacter sp. MFA1 R4	0	0	0	0	0	0	0	0	0.01	0.01	0	0	0	0	0	0	0	0	0	0	0	0	0.01	0	0	0	0	0	0	0	0.01	0	0	0	0	0	0.01	0	0	0	0	0	0.002	0.008	0.002	0.002	0.001	0.001	0.01
Alcaligenes faecalis	0	0	0.01	0	0	0	0	0	0	0.01	0.01	0	0	0	0	0	0.01	0.01	0	0	0	0	0	0	0	0	0	0	0	0	0	0	0	0	0	0	0	0	0	0	0	0	0.005	0.006	0.004	0.004	0.005	0.002	0.006
Massilia sp. WG5	0	0	0.01	0	0	0	0	0	0	0.01	0	0	0	0	0	0	0.01	0	0	0	0	0	0	0	0	0	0	0	0	0	0.01	0	0	0	0	0	0	0.01	0	0	0	0	0.002	0.009	0.002	0.002	0.001	0.001	0.01
Janthinobacterium sp. LM6	0	0	0.01	0	0	0	0	0	0	0.01	0	0	0	0	0	0	0.01	0	0	0	0	0	0	0	0	0	0	0	0	0	0.01	0	0	0	0	0	0	0.01	0	0	0	0	0.003	0.006	0.001	0.001	0.001	1e-05	0.007
Neisseria weaveri	0	0	0	0	0	0	0	0	0.01	0	0	0	0	0	0	0	0	0	0	0	0	0	0.01	0	0	0	0	0	0	0	0.01	0	0	0	0	0	0.02	0	0	0	0	0	0.002	0.003	1e-05	0.001	1e-05	1e-05	0.003
Neisseria flavescens	0	0	0	0	0	0	0	0	0.01	0.01	0	0	0	0	0	0	0	0	0	0	0	0	0.01	0	0	0.01	0	0	0	0	0	0	0	0	0	0	0.01	0	0	0	0	0	1e-05	0.007	0.001	1e-05	0.001	0.003	0.006
Vitreoscilla filiformis	0	0	0.01	0	0	0	0	0	0	0.01	0	0	0	0	0	0	0.01	0	0	0	0	0	0	0	0	0	0	0	0	0	0.01	0	0	0	0	0	0	0.01	0	0	0	0	0.001	0.005	0.001	0.001	0.003	0.001	0.005
Isosphaera pallida	0	0	0.01	0	0	0	0	0	0	0.01	0	0	0	0	0	0	0.01	0	0	0	0	0	0	0	0	0	0	0	0	0	0.01	0	0	0	0	0	0	0	0.01	0	0	0	0.001	0.003	0.001	0.001	1e-05	1e-05	0.003
Treponema putidum	0	0	0.01	0	0	0	0	0	0	0.01	0	0	0	0	0	0	0.01	0	0	0	0	0	0	0	0	0	0	0	0	0	0.01	0	0	0	0	0	0	0.01	0	0	0	0	0.002	0.01	0.002	0.001	0.002	0.001	0.01
Geovibrio thiophilus	0	0	0	0	0.01	0	0	0	0	0	0	0.01	0	0	0	0	0	0	0	0	0	0	0	0	0	0.01	0	0	0	0	0	0	0.01	0	0	0	0.01	0	0	0	0	0	0.002	0.004	0.002	0.001	0.001	0.001	0.003
Terriglobus roseus	0	0	0	0	0	0	0	0	0.01	0.01	0	0	0	0	0	0	0	0	0	0	0	0	0.01	0	0	0	0	0	0	0	0	0	0	0	0	0	0.02	0	0	0	0	0	0.004	0.013	0.002	0.002	0.005	0.002	0.014
Enterobacter sp. ODB01	0	0	0	0	0	0	0	0	0	0	0	0	0	0	0	0.05	0	0	0	0	0	0	0	0	0	0	0	0	0	0	0	0	0	0	0	0	0	0	0	0	0	0	1e-05	1e-05	1e-05	0.005	1e-05	1e-05	1e-05
Citrobacter sp. CF971	0	0	0	0	0	0	0	0	0	0	0	0	0	0	0	0.05	0	0	0	0	0	0	0	0	0	0	0	0	0	0	0	0	0	0	0	0	0	0	0	0	0	0	0.001	1e-05	1e-05	1e-05	1e-05	1e-05	1e-05
Klebsiella sp. LY	0	0	0	0	0	0	0	0	0	0	0	0	0	0	0	0.01	0	0	0.03	0	0	0	0	0	0	0	0	0	0	0	0	0	0	0	0	0	0	0	0	0	0	0.01	1e-05	1e-05	1e-05	1e-05	0.001	0.001	1e-05
Lactobacillus gasseri	0.01	0	0.01	0	0	0	0	0	0	0.01	0	0	0	0	0	0	0.01	0	0	0	0	0	0	0	0	0	0	0	0	0	0	0	0	0	0	0	0	0	0	0	0	0	0.002	0.002	0.001	0.001	0.001	0.001	0.001
Bacillus cohnii	0.01	0	0	0	0	0	0	0.01	0	0	0	0	0	0	0	0	0	0	0	0	0	0.01	0	0	0	0	0	0	0.01	0	0	0	0	0	0	0	0	0	0	0	0	0	0.004	0.003	0.005	0.002	0.002	0.003	0.003
Bacillus kochii	0.01	0	0	0	0	0	0	0.01	0	0	0	0	0	0	0	0	0	0	0	0	0	0.01	0	0	0	0	0	0	0.01	0	0	0	0	0	0	0	0	0	0	0	0	0	0.003	0.004	0.005	0.002	0.002	0.003	0.003
Lysinibacillus fusiformis	0.01	0	0	0	0	0	0	0.01	0	0	0	0	0	0	0	0	0	0	0	0	0	0.01	0	0	0	0	0	0	0.01	0	0	0	0	0	0	0	0	0	0	0	0	0	0.002	0.005	0.009	0.003	0.004	0.004	0.004
Staphylococcus simiae	0.01	0	0	0	0	0	0	0.01	0	0	0	0	0	0	0	0	0	0	0	0	0	0.01	0	0	0	0	0	0	0.01	0	0	0	0	0	0	0	0	0	0	0	0	0	0.001	0.006	0.007	0.002	0.001	0.003	0.006
Staphylococcus simulans	0.01	0	0	0	0	0	0	0.01	0	0	0	0.01	0	0	0	0	0	0	0	0	0	0.01	0	0	0	0	0	0	0	0	0	0	0	0	0	0	0	0	0	0	0	0	1e-05	0.001	0.002	1e-05	0.003	0.001	0.001
Francisella philomiragia	0.01	0	0.01	0	0	0	0	0	0	0.01	0	0	0	0	0	0	0	0	0	0	0	0.01	0	0	0	0	0	0	0	0	0	0	0	0	0	0	0	0	0	0	0	0	0.001	0.002	0.001	0.002	0.001	1e-05	0.002
Gilliamella apicola	0.01	0	0	0	0	0	0	0	0	0	0	0	0	0	0	0	0	0	0	0	0	0.01	0	0	0	0	0	0	0.01	0	0	0	0	0	0	0	0.01	0	0	0	0	0	0.003	0.003	0.006	0.003	0.002	0.002	0.002
Brachyspira hampsonii	0.01	0	0	0	0	0	0.01	0.01	0	0	0	0	0	0	0	0	0	0	0	0	0	0.01	0	0	0	0	0	0	0	0	0	0	0	0	0	0	0	0	0	0	0	0	0.001	0.003	0.004	0.003	0.003	0.003	0.003
Candidatus Arthromitus sp. SFB-rat-Yit	0	0	0	0	0.01	0	0	0	0	0	0	0	0	0	0	0	0	0	0	0	0	0	0	0	0	0.01	0	0	0	0	0	0	0	0	0	0	0.02	0	0	0	0	0	0.004	0.006	0.005	0.001	0.003	0.004	0.004
Desulfofarcimen acetoxidans	0	0	0	0	0	0	0	0	0	0	0	0	0	0	0	0	0	0.01	0	0	0	0	0	0	0	0	0	0	0	0	0.01	0	0	0	0	0	0.01	0	0.01	0	0	0	0.004	0.008	0.004	0.002	0.004	0.003	0.008
Streptococcus porcinus	0	0	0	0.01	0	0	0	0	0	0	0	0	0	0.01	0	0	0	0	0	0	0	0	0	0	0	0	0	0	0	0	0.01	0	0	0	0	0	0	0	0	0.01	0	0	0.003	0.007	0.004	0.002	0.006	0.002	0.005
Lactococcus raffinolactis	0	0	0	0.01	0	0	0	0	0	0	0	0	0	0	0	0	0	0	0	0	0	0	0	0	0	0	0	0	0	0	0	0	0	0	0	0	0	0	0	0	0	0.03	0.002	0.004	0.003	0.001	0.001	0.002	0.003
Lactobacillus farciminis	0	0.04	0	0	0	0	0	0	0	0	0	0	0	0	0	0	0	0	0	0	0	0	0	0	0	0	0	0	0	0	0	0	0	0	0	0	0	0	0	0	0	0	0.001	0.002	0.002	1e-05	0.001	0.001	0.001
Lactobacillus amylolyticus	0	0	0	0	0	0	0	0	0.01	0	0	0	0	0	0	0	0	0	0	0	0	0	0.01	0	0	0	0	0	0	0	0	0	0	0	0	0	0.02	0	0	0	0	0	0.001	0.01	0.001	0.001	0.001	0.001	0.009
Lactobacillus backii	0	0	0	0	0	0	0	0	0	0.01	0	0	0	0	0	0	0	0	0	0	0	0	0.01	0	0	0	0	0	0	0	0.01	0	0	0	0	0	0.01	0	0	0	0	0	0.001	0.008	0.001	0.002	0.001	0.001	0.007
Pediococcus claussenii	0	0	0	0	0	0	0	0.01	0	0	0	0.01	0	0	0.01	0	0	0.01	0	0	0	0	0	0	0	0	0	0	0	0	0	0	0	0	0	0	0	0	0	0	0	0	0.002	0.003	0.002	0.001	0.001	0.001	0.002
Enterococcus gilvus	0	0	0	0	0	0	0.01	0	0	0	0	0	0	0	0	0	0	0.01	0	0	0	0	0	0	0	0	0	0	0	0.02	0	0	0	0	0	0	0	0	0	0	0	0	0.002	0.01	0.002	0.003	0.002	0.001	0.01
Enterococcus avium	0	0	0	0	0	0	0.01	0	0	0	0	0	0	0.01	0	0	0	0	0	0	0	0	0	0	0	0	0	0	0	0.01	0	0	0	0	0	0.01	0	0	0	0	0	0	0.004	0.004	0.006	0.002	0.003	0.001	0.004
Weissella ceti	0	0	0	0	0	0	0	0	0.01	0	0	0	0	0	0	0	0	0	0	0	0	0	0.01	0	0	0	0	0	0	0	0	0	0	0	0	0	0.02	0	0	0	0	0	1e-05	0.001	0.001	0.001	0.001	0.001	0.001
Carnobacterium maltaromaticum	0	0	0	0	0	0	0	0	0	0	0	0	0	0.01	0	0	0	0.01	0	0	0	0	0	0	0	0	0	0.01	0	0	0	0	0	0	0	0	0	0	0.01	0	0	0	0.003	0.003	0.005	0.001	0.007	0.001	0.002
Bacillus ciccensis	0	0	0	0.01	0	0	0	0	0	0	0	0	0	0	0	0	0	0	0	0.01	0	0	0	0	0	0	0	0	0	0	0	0	0	0	0	0	0	0	0.01	0.01	0	0	0.004	0.005	0.003	0.001	0.003	0.003	0.004
Paenibacillus sp. HB172198	0	0	0	0	0	0	0	0.01	0	0	0	0	0	0	0	0	0	0.01	0	0	0	0	0	0	0	0	0	0	0	0	0	0	0	0	0	0.01	0	0	0.01	0	0	0	0.006	0.009	0.003	0.003	0.004	0.003	0.009
Paenibacillus lautus	0	0	0	0.01	0	0	0	0.01	0	0	0	0	0	0	0	0	0	0.01	0	0	0	0	0	0	0	0	0	0	0	0	0	0	0	0	0	0	0	0	0	0.01	0	0	0.003	0.008	0.004	0.002	0.003	0.001	0.008
Brevibacillus formosus	0	0	0.01	0	0	0	0	0	0	0.01	0	0	0	0	0	0	0.01	0	0	0	0	0	0	0	0	0	0	0	0	0	0.01	0	0	0	0	0	0	0	0	0	0	0	0.001	0.002	0.001	0.002	0.001	0.001	0.001
Staphylococcus hyicus	0	0	0	0.01	0	0	0	0	0	0	0	0	0	0.01	0	0	0	0	0	0.01	0	0	0	0	0	0	0	0	0	0	0	0	0	0	0	0	0	0	0.01	0	0	0	0.001	0.003	0.002	0.001	0.004	0.002	0.002
Listeria ivanovii	0	0	0	0.01	0	0	0.01	0.01	0	0	0	0	0	0.01	0	0	0	0	0	0	0	0	0	0	0	0	0	0	0	0	0	0	0	0	0	0	0	0	0	0	0	0	0.003	0.004	0.005	0.003	0.002	0.002	0.003
Streptomyces hygroscopicus	0	0	0	0	0	0	0	0.01	0	0	0	0	0	0	0	0.01	0	0	0	0.01	0	0	0	0.01	0	0	0	0	0	0	0	0	0	0	0	0	0	0	0	0	0	0	0.003	0.003	0.003	0.002	0.002	0.002	0.006
Corynebacterium diphtheriae	0	0	0.01	0	0	0	0	0	0	0.01	0	0.01	0	0	0	0	0.01	0	0	0	0	0	0	0	0	0	0	0	0	0	0	0	0	0	0	0	0	0	0	0	0	0	0.001	0.002	0.001	0.001	0.001	0.001	0.003
Rhodococcus coprophilus	0	0	0.01	0	0	0	0	0	0	0.01	0	0	0	0	0	0	0.01	0	0	0	0	0	0	0	0	0	0	0	0	0	0.01	0	0	0	0	0	0	0	0	0	0	0	0.002	0.002	1e-05	0.001	0.001	1e-05	0.003
Rhodococcus aetherivorans	0	0	0	0.01	0	0	0	0	0	0	0	0	0	0	0	0.01	0	0.01	0.01	0	0	0	0	0	0	0	0	0	0	0	0	0	0	0	0	0	0	0	0	0	0	0	0.001	0.001	0.001	1e-05	0.001	1e-05	0.001
Nocardia cyriacigeorgica	0	0	0.01	0	0	0	0	0.01	0	0.01	0	0	0	0	0	0	0	0	0	0.01	0	0	0	0	0	0	0	0	0	0	0	0	0	0	0	0	0	0	0	0	0	0	0.004	0.007	0.002	0.002	0.003	0.002	0.008
Nocardia terpenica	0	0	0	0	0	0	0	0	0	0.01	0	0	0	0	0	0	0	0	0	0	0	0	0.01	0	0	0	0	0	0	0	0.01	0	0	0	0	0	0.01	0	0	0	0	0	0.002	0.005	0.002	0.001	0.003	0.002	0.006
Microbacterium lemovicicum	0	0	0	0	0	0	0	0	0.01	0	0	0	0	0	0	0	0	0	0	0	0	0	0.01	0	0	0	0	0	0	0	0	0	0	0	0	0	0.02	0	0	0	0	0	0.001	0.007	0.001	0.001	0.001	1e-05	0.007
Candidatus Aquiluna sp. UB-MaderosW2red	0	0	0	0	0	0	0	0	0.01	0	0	0	0	0	0	0	0	0	0	0	0	0	0.01	0	0	0	0	0	0	0	0.01	0	0	0	0	0	0.01	0	0	0	0	0	0.001	0.003	1e-05	1e-05	1e-05	1e-05	0.003
Brevibacterium linens	0	0.01	0.01	0	0	0	0	0	0	0	0	0	0	0	0	0	0	0	0	0.01	0	0	0	0	0	0	0	0	0	0.01	0	0	0	0	0	0	0	0	0	0	0	0	0.003	0.005	0.002	0.002	0.002	0.001	0.007
Arcanobacterium phocae	0	0	0.01	0	0	0	0	0	0	0.01	0	0	0	0	0	0	0.01	0	0	0	0	0	0	0	0	0	0	0	0	0	0.01	0	0	0	0	0	0	0	0	0	0	0	0.001	0.002	0.003	1e-05	0.001	0.001	0.002
Arcanobacterium haemolyticum	0	0	0	0	0	0	0	0	0.01	0	0	0	0	0	0	0	0	0	0	0	0	0	0.01	0	0	0	0	0	0	0	0	0	0	0	0	0	0.02	0	0	0	0	0	0.002	0.001	0.001	1e-05	0.001	0.001	0.002
Cutibacterium avidum	0	0	0.01	0	0	0	0	0	0	0.01	0	0	0	0	0	0	0.01	0	0	0	0	0	0	0	0	0	0	0	0	0	0.01	0	0	0	0	0	0	0	0	0	0	0	0.003	0.001	0.001	0.001	1e-05	0.001	0.001
Micromonospora aurantiaca	0	0	0	0	0	0	0	0.01	0	0	0	0	0	0	0.01	0.01	0	0.01	0	0	0	0	0	0	0	0	0	0	0	0	0	0	0	0	0	0	0	0	0	0	0	0	1e-05	0.001	1e-05	1e-05	0.001	1e-05	0.001
Micromonospora echinaurantiaca	0	0	0	0	0	0	0	0	0.01	0	0	0	0	0	0	0	0	0	0	0	0	0	0.01	0	0	0	0	0	0	0	0	0	0	0	0	0	0.02	0	0	0	0	0	0.002	0.001	0.001	0.001	0.001	0.001	0.002
Actinobacteria bacterium YIM 96077	0	0	0	0	0	0	0	0	0.01	0	0	0	0	0	0	0	0	0	0	0	0	0	0.01	0	0	0	0	0	0	0	0.01	0	0	0	0	0	0.01	0	0	0	0	0	0.003	0.006	0.004	0.001	0.002	0.001	0.006
Nostoc sp. NIES-2111	0	0	0.01	0	0	0	0	0	0	0.01	0	0	0	0.01	0	0	0.01	0	0	0	0	0	0	0	0	0	0	0	0	0	0	0	0	0	0	0	0	0	0	0	0	0	0.002	0.001	1e-05	0.001	0.001	1e-05	1e-05
Nostoc linckia	0	0	0.01	0	0	0	0	0	0	0.02	0	0	0	0	0	0	0.01	0	0	0	0	0	0	0	0	0	0	0	0	0	0	0	0	0	0	0	0	0	0	0	0	0	0.001	0.003	0.001	0.001	0.002	0.001	0.003
Nostoc sp. PCC 7107	0	0	0.01	0	0	0	0	0	0	0.01	0	0	0	0	0	0	0.01	0	0	0	0	0	0	0	0	0	0	0	0	0	0.01	0	0	0	0	0	0	0	0	0	0	0	0.001	0.001	0.002	1e-05	1e-05	0.001	0.001
Scytonema sp. HK-05	0	0	0	0	0	0	0	0	0.01	0	0	0	0	0	0	0	0	0	0	0	0	0	0.02	0	0	0	0	0	0	0	0	0	0	0	0	0	0.01	0	0	0	0	0	0.002	0.002	0.001	0.001	0.001	1e-05	0.002
Arthrospira platensis	0	0	0.01	0	0	0	0	0	0	0.01	0	0	0	0	0	0	0.01	0	0	0	0	0	0	0	0	0	0	0	0	0	0	0	0	0	0	0	0.01	0	0	0	0	0	0.001	0.003	1e-05	1e-05	0.002	0.001	0.003
Halomicronema hongdechloris	0	0	0	0	0	0	0	0	0.01	0	0	0	0	0	0	0	0	0	0	0	0	0	0.01	0	0	0	0	0	0	0	0	0	0	0	0	0	0.02	0	0	0	0	0	0.001	0.005	0.001	0.001	0.001	1e-05	0.004
Chloroflexus aggregans	0	0	0	0	0	0	0	0	0	0.01	0	0	0	0	0	0	0	0	0	0	0	0	0.01	0	0	0	0	0	0	0	0.01	0	0	0	0	0	0.01	0	0	0	0	0	0.002	0.002	0.001	0.001	1e-05	1e-05	0.002
Candidatus Promineofilum breve	0	0	0.01	0	0	0	0	0	0	0.01	0	0	0	0	0	0	0.01	0	0	0	0	0	0	0	0	0	0	0	0	0	0.01	0	0	0	0	0	0	0	0	0	0	0	0.005	0.005	0.003	0.002	0.003	0.003	0.005
Chryseobacterium lactis	0	0	0	0	0.01	0	0	0	0	0	0	0.01	0	0	0	0	0.01	0	0	0	0	0	0	0	0	0.01	0	0	0	0	0	0	0	0	0	0	0	0	0	0	0	0	0.003	0.007	0.003	0.003	0.004	0.001	0.007
Chryseobacterium carnis	0	0	0	0	0	0	0	0	0.01	0	0	0	0	0	0	0	0	0	0	0	0	0	0.01	0	0	0	0	0	0	0	0	0	0.01	0	0	0	0.01	0	0	0	0	0	0.001	0.003	0.002	0.003	0.003	0.001	0.003
Chryseobacterium sp. NBC122	0	0	0.01	0	0	0	0	0	0	0.01	0	0	0	0	0	0	0.01	0	0	0	0	0	0	0	0	0	0	0	0	0	0.01	0	0	0	0	0	0	0	0	0	0	0	0.001	0.009	0.001	0.002	0.003	1e-05	0.008
Capnocytophaga sp. ChDC OS43	0	0	0	0	0	0	0	0	0	0.01	0	0.01	0	0	0	0	0	0	0	0	0	0	0.01	0	0	0	0	0	0	0	0	0	0	0	0	0	0.01	0	0	0	0	0	0.003	0.005	0.003	0.003	0.002	1e-05	0.005
Capnocytophaga sp. H4358	0	0	0	0	0.01	0	0	0	0	0.01	0	0.01	0	0	0	0	0	0	0	0	0	0	0	0	0	0.01	0	0	0	0	0	0	0	0	0	0	0	0	0	0	0	0	1e-05	0.002	1e-05	0.001	1e-05	1e-05	0.002
Tenacibaculum jejuense	0	0	0.01	0	0	0	0	0	0	0	0	0	0	0	0	0	0	0	0	0	0	0	0.01	0	0	0	0	0	0	0	0.01	0	0	0	0	0	0.01	0	0	0	0	0	0.002	0.008	0.004	0.004	0.002	0.002	0.007
Maribacter sp. T28	0	0	0	0	0	0	0	0	0.01	0	0	0.01	0	0	0	0	0	0	0	0	0	0	0	0	0	0	0	0	0	0	0	0	0	0	0	0	0.02	0	0	0	0	0	0.001	0.009	0.003	0.003	0.005	0.002	0.007
Maribacter sp. MAR_2009_60	0	0	0.01	0	0	0	0	0	0	0.01	0	0	0	0	0	0	0.01	0	0	0	0	0	0	0	0	0	0	0	0	0	0.01	0	0	0	0	0	0	0	0	0	0	0	0.001	0.005	0.001	0.001	1e-05	1e-05	0.005
Gramella sp. MAR_2010_102	0	0	0.01	0	0	0	0	0	0	0.01	0	0	0	0	0	0	0.01	0	0	0	0	0	0	0	0	0	0	0	0	0	0.01	0	0	0	0	0	0	0	0	0	0	0	0.002	0.008	0.002	0.002	0.003	0.002	0.008
Myroides odoratus	0	0	0	0	0.01	0	0	0	0	0	0	0.01	0	0	0	0	0	0	0	0	0	0	0	0	0	0.01	0	0	0	0	0	0	0.01	0	0	0	0	0	0	0	0	0	0.003	0.004	0.003	0.003	0.004	1e-05	0.004
Nonlabens dokdonensis	0	0	0.01	0	0	0	0	0	0	0.01	0	0.01	0	0	0	0	0	0	0	0	0	0	0	0	0	0	0	0	0	0	0.01	0	0	0	0	0	0	0	0	0	0	0	0.002	0.004	0.003	0.003	0.004	1e-05	0.004
Dokdonia sp. Dokd-P16	0	0	0	0	0	0	0	0	0.01	0.01	0	0	0	0	0	0	0	0	0	0	0	0	0.01	0	0	0	0	0	0	0	0	0	0	0	0	0	0.01	0	0	0	0	0	0.001	0.004	1e-05	1e-05	0.002	1e-05	0.003
Cloacibacterium normanense	0	0	0	0	0.01	0	0	0	0	0	0	0.01	0	0	0	0	0	0	0	0	0	0	0	0	0	0.01	0	0	0	0	0	0	0.01	0	0	0	0	0	0	0	0	0	0.003	0.006	0.002	0.004	0.005	0.001	0.005
Muriicola sp. MMS17-SY002	0	0	0.01	0	0	0	0	0	0	0.01	0	0	0	0	0	0	0.01	0	0	0	0	0	0	0	0	0	0	0	0	0	0.01	0	0	0	0	0	0	0	0	0	0	0	1e-05	0.004	0.001	0.001	0.004	0.001	0.004
Niabella soli	0	0	0	0	0.01	0	0	0	0	0	0	0.01	0	0	0	0	0	0	0	0	0	0	0	0	0	0.01	0	0	0	0	0	0	0.01	0	0	0	0	0	0	0	0	0	0.003	0.004	0.002	0.005	0.006	0.001	0.003
Rhodothermaceae bacterium RA	0	0	0.01	0	0	0	0	0	0	0.01	0	0	0	0	0	0	0.01	0	0	0	0	0	0	0.01	0	0	0	0	0	0	0	0	0	0	0	0	0	0	0	0	0	0	0.001	0.001	0.001	0.001	0.001	0.001	0.002
Saprospira grandis	0	0	0.01	0	0	0	0	0	0	0.01	0	0	0	0	0	0	0.01	0	0	0	0	0	0	0	0	0	0	0	0	0	0.01	0	0	0	0	0	0	0	0	0	0	0	0.001	0.006	0.001	0.002	0.004	0.001	0.006
Candidatus Cloacimonas acidaminovorans	0	0	0	0	0	0	0	0	0.01	0	0	0	0	0	0	0	0	0	0	0	0	0	0.01	0	0	0	0	0	0	0	0.01	0	0	0	0	0	0.01	0	0	0	0	0	0.001	0.015	0.002	0.002	0.002	0.002	0.013
Klebsiella sp. FDAARGOS_511	0	0	0	0	0	0	0	0	0	0	0	0	0	0	0	0.01	0	0	0	0	0	0	0	0	0	0	0	0	0	0	0	0	0	0	0	0	0	0	0	0	0	0.03	0.005	0.001	0.001	0.001	0.001	0.003	0.001
Klebsiella sp. PO552	0	0	0	0	0	0	0	0	0	0.01	0	0	0	0	0	0.02	0	0	0	0	0	0	0	0	0	0	0	0.01	0	0	0	0	0	0	0	0	0	0	0	0	0	0	0.001	1e-05	1e-05	1e-05	0.015	0.03	1e-05
Enterobacter bugandensis	0	0	0	0	0	0	0	0	0	0	0	0	0	0	0	0.01	0	0	0	0	0	0	0	0	0	0.01	0	0	0	0.01	0	0	0	0	0	0	0.01	0	0	0	0	0	0.007	0.001	0.001	0.005	0.003	1e-05	0.001
Plautia stali symbiont	0	0	0	0	0	0	0	0	0	0	0	0	0	0	0	0	0	0	0	0	0	0	0	0	0	0	0	0	0	0	0	0	0	0	0	0	0.01	0	0	0.01	0	0.02	0.002	0.003	0.001	1e-05	0.001	0.001	0.004
Lelliottia amnigena	0	0	0.01	0	0	0	0	0	0	0.01	0	0	0	0	0	0.01	0	0	0	0	0	0	0	0	0	0	0	0	0	0	0.01	0	0	0	0	0	0	0	0	0	0	0	0.002	0.007	0.002	0.002	0.003	0.002	0.007
Candidatus Fukatsuia symbiotica	0	0	0	0	0	0	0	0	0.01	0	0	0	0	0	0	0	0	0	0	0	0	0	0.01	0	0	0	0	0	0	0	0	0	0	0	0	0	0.02	0	0	0	0	0	0.001	0.001	0.001	1e-05	1e-05	1e-05	0.002
Providencia heimbachae	0	0	0	0	0	0	0	0	0.01	0	0	0	0	0	0	0	0	0	0	0	0	0	0.01	0	0	0	0	0	0	0	0	0	0	0	0	0	0.02	0	0	0	0	0	0.001	0.011	0.001	0.001	1e-05	1e-05	0.01
Xenorhabdus bovienii	0	0	0	0	0	0	0	0	0	0	0	0	0	0	0	0.02	0	0	0	0	0	0	0	0	0	0	0	0	0	0	0.01	0	0	0	0	0	0.01	0	0	0	0	0	0.003	0.003	0.002	0.002	0.002	0.001	0.004
[Pasteurella] aerogenes	0	0	0	0	0	0	0	0	0.01	0	0	0	0	0	0	0	0	0	0	0	0	0	0.01	0	0	0	0	0	0	0	0	0	0	0	0	0	0.02	0	0	0	0	0	0.001	0.005	0.003	0.001	0.002	0.001	0.005
Pseudomonas sp. NIBRBAC000502773	0	0	0	0	0	0	0	0	0.01	0	0	0	0	0	0	0	0	0	0	0	0	0	0.01	0	0	0	0	0	0	0	0.01	0	0	0	0	0	0.01	0	0	0	0	0	0.001	0.003	1e-05	1e-05	0.001	0.001	0.003
Pseudomonas sp. CMR5c	0	0	0	0	0	0	0	0	0.01	0	0	0	0	0	0	0	0	0	0	0	0	0	0.01	0	0	0	0	0	0	0	0	0	0	0	0	0	0.02	0	0	0	0	0	1e-05	0.001	0.001	1e-05	0.001	1e-05	0.002
Azotobacter vinelandii	0	0	0	0	0	0	0	0	0.01	0	0	0	0	0	0	0	0	0	0	0	0	0	0.01	0	0	0	0	0	0	0	0.01	0	0	0	0	0	0.01	0	0	0	0	0	0.001	0.008	0.001	0.001	0.001	0.001	0.009
Shewanella violacea	0	0	0	0	0	0	0	0	0.01	0	0	0	0	0	0	0	0	0	0	0	0	0	0.01	0	0	0	0	0	0	0	0.01	0	0	0	0	0	0.01	0	0	0	0	0	0.001	0.005	0.001	0.001	0.001	1e-05	0.004
Vibrio cholerae	0	0	0.01	0	0	0	0	0	0	0.01	0	0	0	0	0	0	0.01	0	0	0	0	0	0	0	0	0	0	0.01	0	0	0	0	0	0	0	0	0	0	0	0	0	0	0.001	0.009	0.003	0.001	0.001	0.002	0.009
Vibrio mediterranei	0	0	0.01	0	0	0	0	0	0	0.01	0	0	0	0	0	0	0.01	0	0	0	0	0	0	0	0	0	0	0	0	0	0.01	0	0	0	0	0	0	0	0	0	0	0	0.002	0.004	0.002	0.001	0.003	0.001	0.004
Vibrio chagasii	0	0	0.01	0	0	0	0	0	0	0.01	0	0	0	0	0	0	0	0	0	0	0	0	0	0	0	0	0	0	0	0	0.01	0.01	0	0	0	0	0	0	0	0	0	0	0.001	0.002	0.001	1e-05	0.001	0.001	0.002
Halomonas sp. A3H3	0	0	0.01	0	0	0	0	0	0	0.01	0	0	0	0	0	0	0.01	0	0	0	0	0	0	0	0	0	0	0	0	0	0.01	0	0	0	0	0	0	0	0	0	0	0	1e-05	0.003	1e-05	1e-05	1e-05	1e-05	0.002
Francisella sp. FSC1006	0	0	0	0	0	0	0	0	0.01	0	0	0	0	0	0	0	0	0	0	0	0	0	0.01	0	0	0	0	0	0	0	0	0	0	0	0	0	0.02	0	0	0	0	0	0.002	0.004	0.002	0.001	0.001	0.002	0.004
Zobellella denitrificans	0	0	0.01	0	0	0	0	0	0	0.01	0	0	0	0	0	0	0.01	0	0	0	0	0	0	0	0	0	0	0	0	0	0.01	0	0	0	0	0	0	0	0	0	0	0	0.003	0.004	0.002	0.001	0.001	0.001	0.006
Oceanisphaera avium	0	0	0	0	0	0	0	0	0.01	0	0	0	0	0	0	0	0	0	0	0	0	0	0.01	0	0	0	0	0	0	0	0	0	0	0	0	0	0.02	0	0	0	0	0	1e-05	0.006	0.001	1e-05	1e-05	1e-05	0.006
Candidatus Baumannia cicadellinicola	0	0	0	0	0	0	0	0	0.01	0	0	0	0	0	0	0	0	0	0	0	0	0	0.01	0	0	0	0	0	0	0	0	0	0	0	0	0	0.02	0	0	0	0	0	0.001	0.002	0.002	0.001	0.002	0.001	0.002
Cellvibrio sp. PSBB006	0	0	0.01	0	0	0	0	0	0	0.01	0	0	0	0	0	0	0.01	0	0	0	0	0	0	0	0	0	0	0	0	0	0.01	0	0	0	0	0	0	0	0	0	0	0	0.001	0.001	0.001	1e-05	0.004	1e-05	0.001
Desulfovibrio salexigens	0	0	0	0	0	0	0	0	0	0	0	0	0	0	0	0	0.01	0	0	0	0	0	0	0	0	0	0	0	0	0	0.01	0	0	0	0	0	0.01	0.01	0	0	0	0	0.003	0.006	0.004	0.003	0.003	0.002	0.006
Desulfovibrio gigas	0	0	0	0	0	0	0	0	0	0	0	0	0	0	0	0	0	0	0	0	0	0	0	0	0	0	0	0	0.01	0	0	0	0	0.01	0.01	0	0	0	0	0	0.01	0	0.007	0.005	0.002	0.004	0.002	0.002	0.007
Desulfovibrio sp. G11	0	0	0	0	0	0	0	0	0	0	0	0	0	0	0.01	0	0	0	0	0	0	0.01	0	0.01	0.01	0	0	0	0	0	0	0	0	0	0	0	0	0	0	0	0	0	0.001	0.003	1e-05	1e-05	1e-05	1e-05	0.003
Desulfovibrio ferrophilus	0	0	0	0	0	0	0	0	0.01	0	0	0	0	0	0	0	0	0	0	0	0	0	0.01	0	0	0	0	0	0	0	0	0	0	0	0	0	0.02	0	0	0	0	0	0.003	0.006	0.001	0.002	0.001	0.001	0.007
Chondromyces crocatus	0	0	0.01	0	0	0	0	0	0	0.01	0	0	0	0	0	0	0.01	0	0	0	0	0	0	0	0	0	0	0	0	0	0.01	0	0	0	0	0	0	0	0	0	0	0	0.002	0.007	0.002	0.001	0.002	0.001	0.008
Geobacter sp. M21	0	0	0.01	0	0	0	0	0	0	0.01	0	0	0	0	0	0	0.01	0	0	0	0	0	0	0	0	0	0	0	0	0	0.01	0	0	0	0	0	0	0	0	0	0	0	0.002	0.007	0.001	0.002	0.001	0.001	0.008
Bradymonas sediminis	0	0	0	0	0	0	0	0	0	0	0	0	0	0	0	0	0	0.01	0	0	0	0	0.01	0	0	0	0	0	0	0	0.01	0	0	0	0	0	0.01	0	0	0	0	0	0.002	0.006	0.001	0.002	0.002	0.001	0.007
Arcobacter bivalviorum	0	0	0	0.01	0	0	0	0	0	0	0	0	0	0.01	0	0	0	0	0	0	0	0	0	0	0	0	0	0	0	0	0.01	0	0	0	0	0	0.01	0	0	0	0	0	0.001	0.002	0.002	0.001	0.002	0.002	0.002
Helicobacter himalayensis	0	0	0	0	0	0	0	0	0.01	0	0	0	0	0	0	0	0	0	0	0	0	0	0.01	0	0	0	0	0	0	0	0	0	0	0	0	0	0.02	0	0	0	0	0	0.002	0.002	1e-05	0.001	0.001	0.001	0.002
Helicobacter saguini	0	0	0	0	0	0	0	0	0.01	0	0	0	0	0	0	0	0	0	0	0	0	0	0.01	0	0	0	0	0	0	0	0	0	0	0	0	0	0.02	0	0	0	0	0	0.001	0.005	0.001	0.001	1e-05	1e-05	0.004
Rhizobium sp. ACO-34A	0	0	0	0	0	0	0	0	0.01	0	0	0	0	0	0	0	0	0	0	0	0	0	0.01	0	0	0	0	0	0	0	0	0	0	0	0	0	0.02	0	0	0	0	0	0.001	0.009	0.001	0.002	0.001	1e-05	0.01
Neorhizobium sp. NCHU2750	0	0	0.01	0	0	0	0	0	0	0	0	0	0	0	0	0	0	0	0	0	0	0	0.01	0	0	0	0	0	0	0	0.01	0	0	0	0	0	0.01	0	0	0	0	0	0.002	0.008	0.001	0.001	0.001	1e-05	0.008
Mesorhizobium ciceri	0	0	0	0	0	0	0.01	0	0	0	0	0	0	0	0	0	0.01	0	0	0	0.01	0	0	0.01	0	0	0	0	0	0	0	0	0	0	0	0	0	0	0	0	0	0	0.001	0.002	0.001	0.001	0.004	1e-05	0.003
Methylobacterium brachiatum	0	0	0	0	0	0	0	0	0.01	0	0	0	0	0	0	0	0	0	0	0	0	0	0.01	0	0	0	0	0	0	0	0	0	0	0	0	0	0.02	0	0	0	0	0	0.002	0.002	0.001	0.001	0.001	0.001	0.002
Methylorubrum extorquens	0	0	0.01	0	0	0	0	0.01	0	0.01	0	0	0	0	0	0	0.01	0	0	0	0	0	0	0	0	0	0	0	0	0	0	0	0	0	0	0	0	0	0	0	0	0	0.004	0.004	0.002	0.003	0.001	0.001	0.006
Ochrobactrum anthropi	0	0	0.01	0	0	0	0	0	0	0.01	0	0	0	0	0	0	0.01	0	0	0	0	0	0	0.01	0	0	0	0	0	0	0	0	0	0	0	0	0	0	0	0	0	0	0.002	0.003	0.001	0.002	0.002	0.001	0.003
Methylosinus trichosporium	0	0	0.01	0	0	0	0	0	0	0.01	0	0	0	0	0	0	0.01	0	0	0	0	0	0	0	0	0	0	0	0	0	0.01	0	0	0	0	0	0	0	0	0	0	0	0.003	0.007	0.001	0.001	0.001	0.001	0.009
Methylovirgula ligni	0	0	0	0	0	0	0	0	0.01	0	0	0	0	0	0	0	0	0	0	0	0	0	0.01	0	0	0	0	0	0	0	0	0	0	0	0	0	0.02	0	0	0	0	0	0.003	0.007	0.001	0.001	0.001	0.001	0.008
Azospirillum sp. TSA2s	0	0	0	0	0	0	0	0	0.01	0.01	0	0	0	0	0	0	0	0	0	0	0	0	0.01	0	0	0	0	0	0	0	0	0	0	0	0	0	0.01	0	0	0	0	0	0.003	0.002	0.001	0.001	0.001	0.001	0.003
Komagataeibacter xylinus	0	0	0.01	0	0	0	0	0	0	0.01	0	0	0	0	0	0	0.01	0	0	0	0	0	0	0.01	0	0	0	0	0	0	0	0	0	0	0	0	0	0	0	0	0	0	0.002	0.003	0.001	0.001	0.005	1e-05	0.004
Gluconobacter oxydans	0	0	0	0	0	0	0	0	0.01	0	0	0	0	0	0	0	0	0	0	0	0	0	0.01	0	0	0	0	0	0	0	0	0	0	0	0	0	0.02	0	0	0	0	0	0.005	0.003	0.002	0.002	0.003	0.001	0.003
Neokomagataea tanensis	0	0	0	0	0	0	0	0	0.01	0	0	0	0	0	0	0	0	0	0	0	0	0	0.01	0	0	0	0	0	0	0	0	0	0	0	0	0	0.02	0	0	0	0	0	0.002	0.002	0.001	0.001	0.002	0.001	0.002
Sphingomonas sp. MM-1	0	0	0.01	0	0	0	0	0	0	0.01	0	0	0	0	0	0	0.01	0	0	0	0	0	0	0	0	0	0	0	0	0	0.01	0	0	0	0	0	0	0	0	0	0	0	0.002	0.002	0.001	0.001	0.001	0.001	0.003
Sphingomonas sp. FARSPH	0	0	0	0	0	0	0	0	0.01	0	0	0	0	0	0	0	0	0	0	0	0	0	0.01	0	0	0	0	0	0	0	0	0	0	0	0	0	0.02	0	0	0	0	0	0.004	0.004	1e-05	0.001	0.001	1e-05	0.005
Sphingobium sp. RAC03	0	0	0.01	0	0	0	0	0	0	0.01	0	0	0	0	0	0	0.01	0	0	0	0	0	0	0	0	0	0	0	0	0	0.01	0	0	0	0	0	0	0	0	0	0	0	0.001	0.003	1e-05	0.001	1e-05	1e-05	0.003
Erythrobacter litoralis	0	0	0	0	0	0	0	0	0	0.01	0	0	0	0	0	0	0.01	0.01	0	0	0	0	0	0	0	0	0	0	0	0	0.01	0	0	0	0	0	0	0	0	0	0	0	0.004	0.001	0.001	0.001	0.001	0.001	0.002
Anaplasma ovis	0	0	0	0	0	0	0	0	0.01	0	0	0	0	0	0	0	0	0	0	0	0	0	0.01	0	0	0	0	0	0	0	0	0	0	0	0	0	0.02	0	0	0	0	0	1e-05	0.002	1e-05	1e-05	1e-05	1e-05	0.003
Burkholderia ubonensis	0	0	0.01	0	0	0	0	0	0	0.01	0	0	0	0	0	0	0.01	0	0	0	0	0	0	0	0	0	0	0	0	0	0.01	0	0	0	0	0	0	0	0	0	0	0	0.001	0.007	0.002	0.003	0.003	0.001	0.008
Cupriavidus sp. USMAA1020	0	0	0	0	0	0	0	0	0.01	0	0	0	0	0	0	0	0	0	0	0	0	0	0.02	0	0	0	0	0	0	0	0	0	0	0	0	0	0.01	0	0	0	0	0	1e-05	1e-05	0.001	1e-05	0.001	1e-05	1e-05
Ralstonia pickettii	0	0.01	0	0	0	0	0	0	0.01	0	0	0.01	0	0	0	0	0	0	0	0	0	0	0.01	0	0	0	0	0	0	0	0	0	0	0	0	0	0	0	0	0	0	0	0.003	0.003	0.001	0.002	0.001	0.001	0.005
Pandoraea thiooxydans	0	0	0	0	0	0	0	0	0.01	0	0	0	0	0	0	0	0	0	0	0	0	0	0.01	0	0	0	0	0	0	0	0	0	0	0	0	0	0.02	0	0	0	0	0	0.002	0.002	1e-05	0.001	0.001	0.001	0.003
Pandoraea sp. XY-2	0	0	0	0	0	0	0	0	0.01	0	0	0	0	0	0	0	0	0	0	0	0	0	0.01	0	0	0	0	0	0	0	0.01	0	0	0	0	0	0.01	0	0	0	0	0	0.001	0.008	1e-05	0.001	1e-05	0.001	0.009
Mycoavidus cysteinexigens	0	0	0	0	0	0	0	0	0.01	0	0	0	0	0	0	0	0	0	0	0	0	0	0.01	0	0	0	0	0	0	0	0	0	0	0	0	0	0.02	0	0	0	0	0	0.001	1e-05	0.001	1e-05	0.001	1e-05	0.001
Variovorax paradoxus	0	0	0	0	0	0	0	0	0	0	0	0.01	0	0	0	0	0	0	0	0	0	0	0	0	0	0	0	0	0	0	0	0	0	0.01	0	0	0	0.01	0	0	0.01	0	0.009	0.01	0.003	0.006	0.003	0.002	0.013
Aquitalea magnusonii	0	0	0.01	0	0	0	0	0	0	0.01	0	0	0	0	0	0	0.01	0	0	0	0	0	0	0	0	0	0	0	0	0	0.01	0	0	0	0	0	0	0	0	0	0	0	0.002	0.004	1e-05	0.001	0.001	1e-05	0.004
Aquaspirillum sp. LM1	0	0	0	0	0	0	0	0	0.01	0	0	0	0	0	0	0	0	0	0	0	0	0	0.01	0	0	0	0	0	0	0	0	0	0	0	0	0	0.02	0	0	0	0	0	0.002	0.005	0.002	0.002	0.002	0.002	0.006
Laribacter hongkongensis	0	0	0.01	0	0	0	0	0	0	0.01	0	0	0	0	0	0	0.01	0	0	0	0	0	0	0	0	0	0	0	0	0	0.01	0	0	0	0	0	0	0	0	0	0	0	0.003	0.002	0.002	0.001	0.001	0.001	0.003
Sideroxydans lithotrophicus	0	0	0	0	0	0	0	0	0	0.01	0	0	0	0	0	0	0	0	0	0	0	0	0.01	0	0	0	0	0	0	0	0.01	0	0	0	0	0	0.01	0	0	0	0	0	0.002	0.004	0.002	0.001	0.001	0.001	0.005
Bdellovibrio bacteriovorus	0	0	0	0	0	0	0	0	0	0	0	0	0	0	0	0	0	0	0.01	0	0	0	0	0	0	0	0	0	0	0	0	0	0.01	0	0	0	0	0	0.01	0.01	0	0	0.005	0.006	0.004	0.003	0.004	0.002	0.007
Mariprofundus aestuarium	0	0	0.01	0	0	0	0	0	0	0.01	0	0	0	0	0	0	0.01	0	0	0	0	0	0	0	0	0	0	0	0	0	0.01	0	0	0	0	0	0	0	0	0	0	0	0.002	0.003	1e-05	0.001	1e-05	0.001	0.002
Thermogutta terrifontis	0	0	0	0	0	0	0	0	0.01	0	0	0	0	0	0	0	0	0	0	0	0	0	0.01	0	0	0	0	0	0	0	0	0	0	0	0	0	0.02	0	0	0	0	0	0.001	0.011	1e-05	1e-05	0.001	0.001	0.011
Thermanaerovibrio velox	0	0	0	0	0	0	0	0	0	0.01	0	0	0	0	0	0	0	0	0	0	0	0	0.01	0	0	0	0	0	0	0	0.01	0	0	0	0	0	0.01	0	0	0	0	0	0.001	0.005	0.001	0.001	0.001	0.001	0.005
Fusobacterium sp. oral taxon 203	0	0	0.01	0	0	0	0	0	0	0.01	0	0	0	0	0	0	0	0	0	0.01	0	0	0	0	0	0	0	0	0	0	0	0	0	0	0	0	0	0	0	0.01	0	0	1e-05	0.001	0.002	1e-05	0.001	0.001	0.001
Ilyobacter polytropus	0	0	0	0	0	0	0	0	0	0	0	0.01	0	0	0	0	0	0	0	0	0	0	0	0	0	0.01	0	0.01	0	0	0	0	0	0	0	0	0	0	0.01	0	0	0	0.003	0.005	0.004	0.003	0.002	0.004	0.005
Leptotrichia buccalis	0	0	0	0	0	0	0	0	0	0	0	0	0	0.01	0	0	0	0	0	0	0	0	0	0	0	0	0	0.01	0	0	0	0	0	0	0	0	0	0	0.01	0.01	0	0	0.003	0.007	0.005	0.002	0.003	0.005	0.006
Leptotrichia sp. oral taxon 212	0	0	0	0	0	0	0	0	0	0	0	0	0	0.01	0	0	0	0.01	0	0	0	0	0	0	0	0.01	0	0.01	0	0	0	0	0	0	0	0	0	0	0	0	0	0	0.003	0.006	0.006	0.003	0.003	0.003	0.006
Treponema sp. OMZ 838	0	0	0	0	0	0	0	0	0	0	0.01	0	0	0	0	0	0	0.02	0	0	0	0	0	0	0	0	0	0	0	0	0	0	0	0	0	0	0	0	0.01	0	0	0	0.003	0.006	0.006	0.003	0.004	0.003	0.005
Spirochaeta thermophila	0	0	0.01	0	0	0	0	0	0	0.01	0	0	0	0	0	0	0.01	0	0	0	0	0	0	0	0	0	0	0	0	0	0.01	0	0	0	0	0	0	0	0	0	0	0	0.003	0.005	0.002	0.001	0.001	0.002	0.005
Leptospira borgpetersenii	0	0	0	0	0	0	0	0	0.01	0	0	0	0	0	0	0	0	0	0	0	0	0	0.01	0	0	0	0	0	0	0	0	0	0	0	0	0	0.02	0	0	0	0	0	0.002	0.003	0.001	1e-05	0.001	1e-05	0.002
Candidatus Solibacter usitatus	0	0	0	0	0	0	0	0	0.01	0	0	0	0	0	0	0	0	0	0	0	0	0	0.01	0	0	0	0	0	0	0	0	0	0	0	0	0	0.02	0	0	0	0	0	0.005	0.014	0.002	0.003	0.002	0.001	0.014
Enterobacteriaceae bacterium S05	0	0	0	0	0	0	0	0	0	0	0	0	0	0	0	0.01	0	0	0.02	0	0	0	0	0	0	0	0	0	0	0	0	0	0	0	0	0	0	0	0	0	0	0.01	1e-05	1e-05	1e-05	1e-05	0.001	0.001	1e-05
Weissella viridescens	0.01	0	0	0	0	0	0	0.01	0	0	0	0	0	0	0	0	0	0	0	0	0	0	0	0	0	0	0	0	0.01	0	0	0	0	0	0	0	0	0	0	0	0	0	0.001	0.001	0.011	1e-05	1e-05	0.006	0.001
Bacillus aryabhattai	0.01	0	0	0	0	0	0	0.01	0	0	0	0	0	0	0	0	0	0	0	0	0	0.01	0	0	0	0	0	0	0	0	0	0	0	0	0	0	0	0	0	0	0	0	1e-05	1e-05	0.002	1e-05	1e-05	0.001	1e-05
Lysinibacillus varians	0.01	0	0	0	0	0	0	0.01	0	0	0	0	0	0	0	0	0	0	0	0	0	0.01	0	0	0	0	0	0	0	0	0	0	0	0	0	0	0	0	0	0	0	0	1e-05	0.001	0.002	1e-05	1e-05	0.001	0.001
Geobacillus thermoleovorans	0.01	0	0	0	0	0	0	0.01	0	0	0	0	0	0	0	0	0	0	0	0	0	0.01	0	0	0	0	0	0	0	0	0	0	0	0	0	0	0	0	0	0	0	0	0.001	0.001	0.002	1e-05	0.001	0.001	1e-05
Staphylococcus cohnii	0.01	0	0	0	0	0	0	0.01	0	0	0	0	0	0	0	0	0	0	0	0	0	0	0	0	0	0.01	0	0	0	0	0	0	0	0	0	0	0	0	0	0	0	0	0.005	0.004	0.004	0.003	0.002	0.002	0.003
Macrococcus canis	0.01	0	0	0	0	0	0	0	0	0	0	0	0	0	0	0	0	0.01	0	0	0	0	0	0	0	0	0	0	0	0	0	0	0	0	0	0	0	0	0.01	0	0	0	0.002	0.01	0.005	0.001	0.004	0.002	0.008
Polaribacter vadi	0.01	0	0	0	0	0	0	0	0	0	0	0	0	0	0	0	0	0	0	0	0	0	0	0	0	0	0	0	0.01	0	0	0	0	0	0	0	0.01	0	0	0	0	0	0.003	0.008	0.004	0.003	0.002	0.002	0.008
Desulfotomaculum ferrireducens	0	0	0	0	0	0	0	0	0	0	0	0	0	0	0	0	0	0	0	0	0	0	0.01	0	0	0	0	0	0	0	0	0	0	0	0	0	0.01	0	0	0.01	0	0	0.007	0.007	0.004	0.002	0.003	0.002	0.007
Anoxybacter fermentans	0	0	0	0	0	0	0	0	0	0	0	0	0	0.01	0	0	0	0	0	0	0	0	0	0	0	0	0	0	0	0	0	0	0	0	0	0	0.01	0	0.01	0	0	0	0.006	0.007	0.003	0.004	0.003	0.002	0.004
Selenomonas sp. oral taxon 478	0	0	0	0	0	0	0	0	0.01	0	0	0	0	0	0	0	0	0.01	0	0	0	0	0.01	0	0	0	0	0	0	0	0	0	0	0	0	0	0	0	0	0	0	0	0.003	0.008	0.002	0.002	0.001	0.002	0.016
Streptococcus constellatus	0	0.01	0	0	0	0	0	0	0	0	0	0	0	0	0	0.01	0	0	0	0	0	0.01	0	0	0	0	0	0	0	0	0	0	0	0	0	0	0	0	0	0	0	0	0.001	0.001	0.001	1e-05	1e-05	1e-05	0.001
Lactobacillus jensenii	0	0	0	0	0	0	0	0	0	0	0	0	0	0.01	0	0	0	0.01	0	0	0	0	0	0	0	0	0	0.01	0	0	0	0	0	0	0	0	0	0	0	0	0	0	0.004	0.006	0.003	0.002	0.004	0.002	0.005
Enterococcus hirae	0	0	0	0	0	0	0	0	0	0	0	0	0	0.01	0	0	0	0	0	0	0	0	0	0	0	0	0	0	0	0.02	0	0	0	0	0	0	0	0	0	0	0	0	0.004	0.002	0.004	0.003	0.003	0.002	0.002
Vagococcus sp. CF-49	0	0	0	0	0	0	0	0	0.01	0	0	0	0	0	0	0	0	0	0	0	0	0	0	0	0	0	0	0	0	0	0	0	0	0	0	0	0.02	0	0	0	0	0	0.001	0.007	0.004	0.001	0.002	0.001	0.006
Leuconostoc garlicum	0	0	0	0	0	0	0	0	0	0	0	0	0	0	0	0	0	0	0	0	0	0	0.02	0	0	0	0	0	0	0	0	0	0	0	0	0	0.01	0	0	0	0	0	0.002	0.001	0.014	1e-05	1e-05	0.001	0.001
Bacillus paranthracis	0	0	0	0	0	0	0	0	0	0	0	0	0	0.02	0	0	0	0.01	0	0	0	0	0	0	0	0	0	0	0	0	0	0	0	0	0	0	0	0	0	0	0	0	1e-05	1e-05	1e-05	1e-05	0.001	1e-05	1e-05
Bacillus sonorensis	0	0	0	0	0	0	0	0	0	0	0	0	0	0.01	0	0	0	0.01	0	0	0	0	0	0	0	0	0	0	0	0	0	0	0	0	0	0	0	0	0.01	0	0	0	0.003	0.004	0.005	0.003	0.005	0.004	0.004
Bacillus sp. X1(2014)	0	0	0	0	0	0	0	0	0	0	0	0	0	0	0	0	0	0.01	0	0	0	0	0	0	0	0	0	0	0	0	0	0	0	0	0	0	0	0	0.01	0.01	0	0	0.003	0.005	0.003	0.001	0.004	0.002	0.004
Fictibacillus phosphorivorans	0	0	0	0.01	0	0	0	0	0	0	0	0	0	0	0	0	0	0.01	0	0	0	0	0	0	0	0	0	0	0	0	0	0	0	0	0	0	0	0	0.01	0	0	0	0.003	0.004	0.005	0.003	0.003	0.003	0.003
Paenibacillus larvae	0	0	0	0.01	0	0	0	0	0	0	0	0	0	0	0	0	0	0	0	0	0	0	0	0	0	0	0	0	0	0	0	0	0	0	0	0	0	0	0.01	0.01	0	0	0.003	0.007	0.005	0.003	0.005	0.004	0.006
Paenibacillus terrae	0	0	0	0	0	0	0	0	0	0	0	0	0	0.01	0	0	0	0.01	0	0	0	0	0	0	0	0	0	0.01	0	0	0	0	0	0	0	0	0	0	0	0	0	0	0.003	0.004	0.002	0.001	0.003	0.001	0.003
Paenibacillus sp. FSL P4-0081	0	0	0	0.01	0	0	0	0	0	0	0	0	0	0	0	0	0.01	0	0	0	0	0	0	0	0	0	0	0	0	0	0	0	0	0	0	0	0	0	0.01	0	0	0	0.005	0.005	0.004	0.002	0.003	0.002	0.005
Thermobacillus composti	0	0	0	0	0	0	0	0.01	0	0	0	0	0	0	0	0	0	0	0	0	0	0	0	0.01	0	0	0	0	0	0	0	0	0	0	0	0	0	0.01	0	0	0	0	0.011	0.008	0.003	0.003	0.003	0.002	0.01
Staphylococcus sciuri	0	0	0.01	0	0	0	0	0	0	0	0	0	0	0	0	0	0	0	0	0	0	0	0	0	0	0	0	0.01	0	0	0.01	0	0	0	0	0	0	0	0	0	0	0	0.003	0.005	0.003	0.001	0.004	0.002	0.004
Staphylococcus pasteuri	0	0	0	0	0	0	0	0	0.01	0	0	0	0	0	0	0	0.01	0	0	0	0	0	0.01	0	0	0	0	0	0	0	0	0	0	0	0	0	0	0	0	0	0	0	0.002	0.004	0.002	0.001	0.002	0.001	0.002
Planococcus faecalis	0	0	0.01	0	0	0	0	0	0	0.01	0	0	0	0	0	0	0.01	0	0	0	0	0	0	0	0	0	0	0	0	0	0	0	0	0	0	0	0	0	0	0	0	0	1e-05	0.002	1e-05	1e-05	0.001	1e-05	0.001
Kurthia sp. 11kri321	0	0	0	0	0	0	0	0	0.01	0	0	0	0	0	0	0	0	0	0	0	0	0	0.01	0	0	0	0	0	0	0	0	0	0	0	0	0	0.01	0	0	0	0	0	0.003	0.008	0.002	0.002	0.002	0.002	0.008
Peptoniphilus harei	0	0	0	0	0	0	0	0	0	0	0	0	0	0.01	0	0	0	0.01	0	0	0	0	0	0	0	0	0	0	0	0	0	0	0	0	0	0	0	0	0.01	0	0	0	0.003	0.005	0.004	0.002	0.002	0.004	0.004
Bifidobacterium pseudolongum	0	0.01	0	0	0	0	0	0	0	0	0	0	0	0	0.01	0.01	0	0	0	0	0	0	0	0	0	0	0	0	0	0	0	0	0	0	0	0	0	0	0	0	0	0	0.005	0.005	0.003	0.002	0.004	0.002	0.007
Bifidobacterium choerinum	0	0.01	0	0	0	0	0	0	0.01	0	0	0	0	0	0	0	0	0	0	0	0	0	0.01	0	0	0	0	0	0	0	0	0	0	0	0	0	0	0	0	0	0	0	0.003	0.003	0.002	0.001	0.002	0.001	0.004
Parascardovia denticolens	0	0	0	0	0	0	0	0	0	0	0	0	0	0	0.01	0	0	0	0	0	0	0	0	0	0	0	0	0	0.01	0	0	0	0	0	0	0.01	0	0	0	0	0	0	0.002	0.002	0.003	0.001	0.001	0.001	0.003
Scardovia inopinata	0	0	0	0	0	0	0	0	0.01	0	0	0	0	0	0	0	0	0	0	0	0	0	0.01	0	0	0	0	0	0	0	0	0	0	0	0	0	0.01	0	0	0	0	0	0.002	0.002	0.001	0.001	0.002	0.001	0.002
Streptomyces sampsonii	0	0	0.01	0	0	0	0	0	0	0.01	0	0	0	0	0	0	0.01	0	0	0	0	0	0	0	0	0	0	0	0	0	0	0	0	0	0	0	0	0	0	0	0	0	1e-05	1e-05	1e-05	1e-05	1e-05	1e-05	1e-05
Corynebacterium ulcerans	0	0	0	0	0	0	0	0	0	0	0	0	0	0	0	0	0	0.01	0	0	0	0	0.01	0	0	0	0	0	0	0	0	0	0	0	0	0	0.01	0	0	0	0	0	0.002	0.006	0.001	0.001	0.002	0.001	0.005
Corynebacterium terpenotabidum	0	0	0.01	0	0	0	0	0	0	0.01	0	0	0	0	0	0	0	0	0	0	0	0	0	0	0	0	0	0	0	0	0.01	0	0	0	0	0	0	0	0	0	0	0	0.001	0.002	0.001	0.001	1e-05	0.001	0.003
Mycobacterium sp. DL90	0	0	0	0	0	0	0	0	0.01	0	0	0	0	0	0	0	0	0	0	0	0	0	0.01	0	0	0	0	0	0	0	0	0	0	0	0	0	0.01	0	0	0	0	0	0.002	0.002	0.001	0.001	0.001	0.001	0.003
Clavibacter michiganensis	0	0	0	0	0	0	0	0.01	0	0	0	0	0	0	0	0.01	0	0.01	0	0	0	0	0	0	0	0	0	0	0	0	0	0	0	0	0	0	0	0	0	0	0	0	0.004	0.007	0.002	0.004	0.002	0.002	0.009
Microlunatus phosphovorus	0	0	0	0	0	0	0	0	0	0	0	0	0	0	0	0	0	0	0	0	0	0	0	0	0.01	0	0	0	0	0	0	0.01	0	0	0	0	0	0	0.01	0	0	0	0.001	0.001	0.001	0.001	0.001	0.001	0.002
Micropruina glycogenica	0	0	0	0	0	0	0	0	0	0	0	0	0	0	0	0	0	0	0	0.01	0	0	0	0	0	0	0	0	0	0	0	0.01	0	0	0	0	0	0	0.01	0	0	0	0.002	0.004	0.001	0.001	0.001	1e-05	0.005
Actinoalloteichus sp. AHMU CJ021	0	0	0.01	0	0	0	0	0	0	0.01	0	0	0	0	0	0	0	0	0	0	0	0	0	0	0	0	0	0	0	0	0.01	0	0	0	0	0	0	0	0	0	0	0	0.002	0.002	0.001	0.002	0.001	0.001	0.003
Nostoc sp. 'Peltigera membranacea cyanobiont' N6	0	0	0.01	0	0	0	0	0	0	0.01	0	0	0	0	0	0	0	0	0	0	0	0	0	0	0	0	0	0	0	0	0.01	0	0	0	0	0	0	0	0	0	0	0	0.001	0.002	0.002	0.001	0.001	0.002	0.002
Nostoc piscinale	0	0	0	0	0	0	0	0	0.01	0	0	0	0	0	0	0	0	0	0	0	0	0	0.01	0	0	0	0	0	0	0	0	0	0	0	0	0	0.01	0	0	0	0	0	0.001	0.001	0.001	1e-05	0.001	0.001	0.001
Trichormus variabilis	0	0	0.01	0	0	0	0	0	0	0.01	0	0	0	0	0	0	0.01	0	0	0	0	0	0	0	0	0	0	0	0	0	0	0	0	0	0	0	0	0	0	0	0	0	0.001	0.008	0.002	0.001	0.001	0.001	0.005
Calothrix sp. NIES-2098	0	0	0.01	0	0	0	0	0	0	0.01	0	0	0	0	0	0	0.01	0	0	0	0	0	0	0	0	0	0	0	0	0	0	0	0	0	0	0	0	0	0	0	0	0	0.003	0.001	0.001	0.002	0.004	0.001	0.001
Sphaerospermopsis kisseleviana	0	0	0	0	0	0	0	0	0.01	0	0	0	0	0	0	0	0	0	0	0	0	0	0.01	0	0	0	0	0	0	0	0	0	0	0	0	0	0.01	0	0	0	0	0	0.002	0.002	0.001	0.002	0.001	0.002	0.002
Nostocales cyanobacterium HT-58-2	0	0	0	0	0	0	0	0	0.01	0	0	0	0	0	0	0	0	0	0	0	0	0	0	0	0	0	0	0	0	0	0	0	0	0	0	0	0.02	0	0	0	0	0	0.001	0.002	0.001	0.001	0.001	0.001	0.002
Stanieria cyanosphaera	0	0	0.01	0	0	0	0	0	0	0.01	0	0	0	0	0	0	0	0	0	0	0	0	0	0	0	0	0	0	0	0	0.01	0	0	0	0	0	0	0	0	0	0	0	0.001	0.006	0.001	1e-05	0.003	0.001	0.005
Stanieria sp. NIES-3757	0	0	0	0	0	0	0	0	0.01	0	0	0	0	0	0	0	0	0	0	0	0	0	0.01	0	0	0	0	0	0	0	0	0	0	0	0	0	0.01	0	0	0	0	0	0.001	0.004	0.002	0.001	0.002	0.001	0.004
Mycoplasma pulmonis	0	0	0	0	0	0	0	0	0	0	0	0	0	0	0	0.02	0	0	0	0	0	0	0	0	0	0	0	0	0	0	0	0	0	0	0	0	0.01	0	0	0	0	0	0.001	1e-05	0.002	0.001	1e-05	1e-05	1e-05
Mycoplasma hyorhinis	0	0	0	0	0	0	0	0	0.01	0	0	0	0	0	0	0	0	0	0	0	0	0	0.01	0	0	0	0	0	0	0	0	0	0	0	0	0	0.01	0	0	0	0	0	0.001	0.001	1e-05	0.001	0.001	0.001	0.001
Acholeplasma laidlawii	0	0	0	0	0	0	0	0	0	0	0	0	0	0	0	0	0	0	0	0	0	0	0.01	0	0	0	0	0	0	0	0.01	0	0	0	0	0	0.01	0	0	0	0	0	0.003	0.009	0.001	1e-05	0.001	0.001	0.007
Deinococcus geothermalis	0	0	0	0	0	0	0	0	0	0	0	0	0	0	0	0	0	0.01	0	0	0	0	0	0	0	0	0	0	0	0	0	0	0	0	0.01	0	0	0	0.01	0	0	0	0.002	0.002	0.001	0.001	0.002	0.002	0.002
Flavobacterium branchiophilum	0	0	0	0	0	0	0	0	0	0	0	0	0	0	0	0.01	0	0	0	0	0	0	0.01	0	0	0	0	0	0	0	0	0	0	0	0	0	0.01	0	0	0	0	0	0.002	0.004	0.002	0.003	0.002	0.001	0.003
Polaribacter sp. MED152	0	0	0.01	0	0	0	0	0	0	0.01	0	0	0	0	0	0	0	0	0	0	0	0	0	0	0	0	0	0	0	0	0.01	0	0	0	0	0	0	0	0	0	0	0	0.001	0.006	0.001	0.003	0.002	0.001	0.006
Capnocytophaga sp. oral taxon 864	0	0	0.01	0	0	0	0	0	0	0.01	0	0	0	0	0	0	0.01	0	0	0	0	0	0	0	0	0	0	0	0	0	0	0	0	0	0	0	0	0	0	0	0	0	1e-05	0.002	1e-05	1e-05	1e-05	1e-05	0.002
Maribacter sp. HTCC2170	0	0	0	0	0	0	0	0	0.01	0	0	0	0	0	0	0	0	0	0	0	0	0	0.01	0	0	0	0	0	0	0	0	0	0	0	0	0	0.01	0	0	0	0	0	0.002	0.009	0.001	0.003	0.004	1e-05	0.007
Winogradskyella sp. PG-2	0	0	0	0	0	0	0	0	0	0	0	0.01	0	0	0	0	0	0	0	0	0	0	0	0	0	0	0	0	0	0	0	0	0	0	0	0	0.01	0.01	0	0	0	0	0.002	0.008	0.001	0.003	0.003	0.001	0.007
Myroides odoratimimus	0	0	0	0	0.01	0	0	0	0	0	0	0.01	0	0	0	0	0	0	0	0	0	0.01	0	0	0	0	0	0	0	0	0	0	0	0	0	0	0	0	0	0	0	0	0.002	0.002	0.001	0.002	0.003	0.001	0.002
Lacinutrix venerupis	0	0	0.01	0	0	0	0	0	0	0.01	0	0	0	0	0	0	0	0	0	0	0	0	0	0	0	0	0	0	0	0	0.01	0	0	0	0	0	0	0	0	0	0	0	0.002	0.004	0.002	0.002	0.001	0.001	0.003
Formosa agariphila	0	0	0	0	0	0	0	0	0	0	0	0	0	0	0	0	0	0	0	0	0	0	0.01	0	0	0	0	0	0	0	0.01	0	0	0	0	0	0.01	0	0	0	0	0	0.002	0.007	0.002	0.003	0.006	0.001	0.006
Siansivirga zeaxanthinifaciens	0	0	0	0	0.01	0	0	0	0	0	0	0.01	0	0	0	0	0	0	0	0	0	0	0	0	0	0	0	0	0	0	0	0	0.01	0	0	0	0	0	0	0	0	0	0.002	0.003	0.002	0.003	0.002	0.001	0.002
Psychroserpens sp. NJDZ02	0	0	0.01	0	0	0	0	0	0	0.01	0	0	0	0	0	0	0.01	0	0	0	0	0	0	0	0	0	0	0	0	0	0	0	0	0	0	0	0	0	0	0	0	0	0.001	0.003	0.001	0.001	0.001	0.001	0.003
Muricauda lutaonensis	0	0	0.01	0	0	0	0	0	0	0.01	0	0	0	0	0	0	0	0	0	0	0	0	0	0	0	0	0	0	0	0	0.01	0	0	0	0	0	0	0	0	0	0	0	0.003	0.005	0.001	0.002	0.003	0.001	0.005
Gilvibacter sp. SZ-19	0	0	0.01	0	0	0	0	0	0	0.01	0	0	0	0	0	0	0	0	0	0	0	0	0	0	0	0	0	0	0	0	0.01	0	0	0	0	0	0	0	0	0	0	0	0.002	0.011	1e-05	0.001	0.003	1e-05	0.012
Hymenobacter sp. DG25B	0	0	0.01	0	0	0	0	0	0	0.01	0	0	0	0	0	0	0.01	0	0	0	0	0	0	0	0	0	0	0	0	0	0	0	0	0	0	0	0	0	0	0	0	0	0.002	0.004	1e-05	0.002	0.004	0.001	0.004
Rhodothermaceae bacterium	0	0	0.01	0	0	0	0	0	0	0.01	0	0	0	0	0	0	0	0	0	0	0	0	0	0	0	0	0	0	0	0	0	0	0	0	0	0	0.01	0	0	0	0	0	0.001	0.003	0.001	0.001	0.001	0.001	0.004
Chlorobium phaeovibrioides	0	0	0	0	0	0	0	0	0	0.01	0	0	0	0	0	0	0	0.01	0	0	0	0	0	0	0	0	0	0	0	0	0.01	0	0	0	0	0	0	0	0	0	0	0	0.001	0.004	0.001	0.001	0.002	1e-05	0.004
Melioribacter roseus	0	0	0	0	0	0	0	0	0	0	0	0.01	0	0	0	0	0	0.01	0	0	0	0	0	0	0	0	0	0	0	0	0	0	0.01	0	0	0	0	0	0	0	0	0	0.004	0.003	0.002	0.002	0.007	0.001	0.003
Gemmatimonas aurantiaca	0	0	0	0	0	0	0	0	0.01	0	0	0	0	0	0	0	0	0	0	0	0	0	0.01	0	0	0	0	0	0	0	0	0	0	0	0	0	0.01	0	0	0	0	0	0.002	0.008	0.001	1e-05	1e-05	0.001	0.009
Enterobacter ludwigii	0	0	0	0	0	0	0	0	0	0	0	0	0	0	0	0.01	0	0.01	0.01	0	0	0	0	0	0	0	0	0	0	0	0	0	0	0	0	0	0	0	0	0	0	0	0.001	0.001	0.001	0.003	0.003	0.001	0.001
Cronobacter universalis	0	0	0	0	0	0	0	0	0	0	0	0	0	0	0	0	0	0	0	0	0.03	0	0	0	0	0	0	0	0	0	0	0	0	0	0	0	0	0	0	0	0	0	0.001	1e-05	1e-05	1e-05	1e-05	1e-05	1e-05
Raoultella electrica	0	0	0	0	0	0	0	0	0.01	0	0	0	0	0	0	0	0	0	0	0	0	0	0.01	0	0	0	0	0	0	0	0	0	0	0	0	0	0.01	0	0	0	0	0	0.001	0.002	1e-05	0.001	1e-05	1e-05	0.002
Lelliottia jeotgali	0	0	0.01	0	0	0	0	0	0	0.01	0	0	0	0	0	0	0	0	0	0	0	0	0	0	0	0	0	0	0	0	0.01	0	0	0	0	0	0	0	0	0	0	0	0.001	0.004	0.001	0.001	0.003	0.001	0.004
Buttiauxella sp. 3AFRM03	0	0	0	0	0	0	0	0	0.01	0	0	0	0	0	0	0	0	0	0	0	0	0	0.01	0	0	0	0	0	0	0	0	0	0	0	0	0	0.01	0	0	0	0	0	0.001	0.002	1e-05	0.001	0.001	0.001	0.001
Serratia sp. ATCC 39006	0	0	0	0	0	0	0	0	0.01	0	0	0	0	0	0	0	0	0	0	0	0	0	0.01	0	0	0	0	0	0	0	0	0	0	0	0	0	0.01	0	0	0	0	0	0.002	0.002	0.001	0.001	0.003	0.001	0.003
Yersinia frederiksenii	0	0	0.01	0	0	0	0	0	0	0.01	0	0	0	0	0	0	0.01	0	0	0	0	0	0	0	0	0	0	0	0	0	0	0	0	0	0	0	0	0	0	0	0	0	0.002	0.002	0.002	0.001	1e-05	0.001	0.001
Providencia rustigianii	0	0	0	0	0	0	0	0	0	0.01	0	0	0	0	0	0	0	0	0	0	0	0	0.01	0	0	0	0	0	0	0	0	0	0	0	0	0	0.01	0	0	0	0	0	0.001	0.003	0.002	0.001	0.001	0.001	0.002
Phytobacter ursingii	0	0	0	0	0	0	0	0	0.01	0	0	0	0	0	0	0	0	0	0	0	0	0	0.01	0	0	0	0	0	0	0	0	0	0	0	0	0	0.01	0	0	0	0	0	0.001	0.001	1e-05	0.001	0.001	1e-05	0.001
Pseudomonas azotoformans	0	0	0	0	0	0	0	0	0.01	0	0	0	0	0	0	0	0	0	0	0	0	0	0.01	0	0	0	0	0	0	0	0	0	0	0	0	0	0.01	0	0	0	0	0	0.002	0.001	0.001	0.001	0.001	0.001	0.002
Pseudomonas tolaasii	0	0	0	0	0	0	0	0	0	0	0	0	0	0	0	0	0	0	0.01	0	0	0	0	0.01	0	0	0	0	0	0	0.01	0	0	0	0	0	0	0	0	0	0	0	0.004	0.022	1e-05	0.001	0.002	0.002	0.013
Pseudomonas fulva	0	0	0	0	0	0	0	0.01	0	0	0	0	0	0	0.01	0	0	0	0	0	0	0.01	0	0	0	0	0	0	0	0	0	0	0	0	0	0	0	0	0	0	0	0	0.002	0.002	0.001	1e-05	1e-05	0.001	0.003
Pseudomonas syringae group genomosp. 3	0	0	0	0	0.01	0	0	0	0	0	0	0.01	0	0	0	0	0	0	0	0	0	0	0	0	0	0.01	0	0	0	0	0	0	0	0	0	0	0	0	0	0	0	0	1e-05	0.001	1e-05	0.001	1e-05	1e-05	0.001
Pseudomonas sp. ATCC 13867	0	0	0	0	0	0	0	0	0.01	0	0	0	0	0	0	0	0	0	0	0	0	0	0.01	0	0	0	0	0	0	0	0	0	0	0	0	0	0.01	0	0	0	0	0	0.002	0.006	0.001	0.001	0.001	0.001	0.007
Acinetobacter wuhouensis	0	0	0.01	0	0	0	0	0	0	0.01	0	0	0	0	0	0	0	0	0	0	0	0	0	0	0	0	0	0	0	0	0.01	0	0	0	0	0	0	0	0	0	0	0	0.001	0.006	0.004	0.001	0.002	0.001	0.005
Acinetobacter sp. WCHA45	0	0	0	0	0	0	0	0	0.01	0	0	0	0	0	0	0	0	0	0	0	0	0	0.01	0	0	0	0	0	0	0	0	0	0	0	0	0	0.01	0	0	0	0	0	0.001	0.003	0.001	1e-05	0.001	0.001	0.003
Marinobacter hydrocarbonoclasticus	0	0	0	0	0	0	0	0	0	0	0	0	0	0	0	0	0	0	0	0	0	0	0.01	0	0	0	0	0	0	0	0.01	0	0	0	0	0	0.01	0	0	0	0	0	0.001	0.004	0.002	0.001	0.001	1e-05	0.004
Shewanella halifaxensis	0	0	0	0	0	0	0	0	0.01	0	0	0	0	0	0	0	0	0	0	0	0	0	0.01	0	0	0	0	0	0	0	0	0	0	0	0	0	0.01	0	0	0	0	0	0.001	0.001	0.001	1e-05	0.001	1e-05	0.001
Pseudoalteromonas sp. 1_2015MBL_MicDiv	0	0	0.01	0	0	0	0	0	0	0.01	0	0	0	0	0	0	0.01	0	0	0	0	0	0	0	0	0	0	0	0	0	0	0	0	0	0	0	0	0	0	0	0	0	1e-05	1e-05	0.001	1e-05	1e-05	1e-05	1e-05
Idiomarinaceae bacterium HL-53	0	0	0	0	0	0	0	0	0.01	0	0	0	0	0	0	0	0	0	0	0	0	0	0.01	0	0	0	0	0	0	0	0	0	0	0	0	0	0.01	0	0	0	0	0	0.001	0.004	0.002	0.001	0.001	1e-05	0.004
Vibrio diabolicus	0	0	0.01	0	0	0	0	0	0	0.01	0	0	0	0	0	0	0.01	0	0	0	0	0	0	0	0	0	0	0	0	0	0	0	0	0	0	0	0	0	0	0	0	0	0.001	1e-05	1e-05	0.001	1e-05	1e-05	1e-05
Vibrio campbellii	0	0	0	0	0	0	0	0	0.01	0	0	0	0	0	0	0	0	0	0	0	0	0	0.01	0	0	0	0	0	0	0	0	0	0	0	0	0	0.01	0	0	0	0	0	0.001	0.002	0.002	0.001	0.003	0.001	0.002
Vibrio rotiferianus	0	0	0.01	0	0	0	0	0	0	0.01	0	0	0	0	0	0	0.01	0	0	0	0	0	0	0	0	0	0	0	0	0	0	0	0	0	0	0	0	0	0	0	0	0	0.001	0.001	0.001	0.002	0.001	1e-05	0.001
Aliivibrio fischeri	0	0	0.01	0	0	0	0	0	0	0.01	0	0	0	0	0	0	0	0	0	0	0	0	0	0	0	0	0	0	0	0	0.01	0	0	0	0	0	0	0	0	0	0	0	0.003	0.004	0.003	0.002	0.002	0.001	0.003
Photobacterium profundum	0	0	0	0	0	0	0	0	0	0.01	0	0	0	0	0	0	0	0	0	0	0	0	0.01	0	0	0	0	0	0	0	0	0	0	0	0	0	0.01	0	0	0	0	0	0.002	0.005	0.002	1e-05	0.001	0.002	0.004
Salinivibrio kushneri	0	0	0	0	0	0	0	0	0	0	0	0	0	0	0	0	0	0	0	0	0	0	0.01	0	0	0	0	0	0	0	0.01	0	0	0	0	0	0.01	0	0	0	0	0	0.001	0.005	0.001	0.001	1e-05	0.001	0.005
Stenotrophomonas rhizophila	0	0	0.01	0	0	0	0	0	0	0.01	0	0	0	0	0	0	0	0	0	0	0	0	0	0	0	0	0	0	0	0	0.01	0	0	0	0	0	0	0	0	0	0	0	0.002	0.003	0.002	0.003	0.003	0.001	0.004
Xanthomonas oryzae	0	0	0	0	0	0	0	0	0	0	0	0	0	0	0	0	0	0	0	0	0	0	0.01	0	0	0	0	0	0	0	0.01	0	0	0	0	0	0.01	0	0	0	0	0	0.002	0.001	0.001	0.002	0.003	1e-05	0.002
Lysobacter sp. SJ-36	0	0	0	0	0	0	0	0	0	0	0	0	0	0	0	0	0	0	0	0	0	0	0.01	0	0	0	0	0	0	0	0	0	0	0	0	0	0.02	0	0	0	0	0	0.001	0.005	0.001	0.001	0.001	0.001	0.006
Pseudoxanthomonas suwonensis	0	0	0	0	0	0	0	0	0	0	0	0	0	0	0	0	0	0.01	0	0	0	0	0	0	0	0	0	0	0	0	0	0	0	0	0.01	0	0	0	0.01	0	0	0	0.004	0.004	0.004	0.002	0.003	0.002	0.006
Dyella sp. M7H15-1	0	0	0	0	0	0	0	0	0	0.01	0	0	0	0	0	0	0	0	0	0	0	0	0.01	0	0	0	0	0	0	0	0	0	0	0	0	0	0.01	0	0	0	0	0	0.002	0.003	0.001	0.002	0.001	0.001	0.003
Chromatiaceae bacterium 2141T.STBD.0c.01a	0	0	0	0	0	0	0	0	0.01	0	0	0	0	0	0	0	0	0	0	0	0	0	0.01	0	0	0	0	0	0	0	0	0	0	0	0	0	0.01	0	0	0	0	0	0.002	0.003	0.001	0.001	0.001	0.001	0.004
Desulfomicrobium baculatum	0	0	0	0	0	0	0	0	0	0.01	0	0	0	0	0	0	0	0	0	0	0	0	0	0	0	0	0	0	0	0	0	0	0	0	0	0	0.01	0	0	0	0.01	0	0.004	0.007	0.002	0.003	0.001	0.001	0.009
Archangium gephyra	0	0	0	0	0	0	0	0	0	0	0	0	0	0	0	0.01	0	0.01	0	0	0	0	0	0	0	0	0	0	0	0	0	0	0	0	0.01	0	0	0	0	0	0	0	0.004	0.004	0.004	0.003	0.004	0.003	0.006
Geobacter sulfurreducens	0	0	0.01	0	0	0	0	0	0	0	0	0	0	0	0	0	0.01	0	0	0	0	0	0	0.01	0	0	0	0	0	0	0	0	0	0	0	0	0	0	0	0	0	0	0.003	0.004	0.002	0.003	0.004	0.001	0.005
Desulfuromonas sp. DDH964	0	0	0	0	0	0	0	0	0.01	0	0	0	0	0	0	0	0	0	0	0	0	0	0.01	0	0	0	0	0	0	0	0	0	0	0	0	0	0.01	0	0	0	0	0	0.002	0.007	0.002	0.002	0.002	0.002	0.006
Helicobacter suis	0	0	0	0	0	0	0	0	0.01	0	0	0	0	0	0	0	0	0	0	0	0	0	0	0	0	0	0	0	0	0	0	0	0	0	0	0	0.02	0	0	0	0	0	0.001	0.001	1e-05	1e-05	1e-05	1e-05	0.001
Ensifer adhaerens	0	0	0.01	0	0	0	0.01	0	0	0.01	0	0	0	0	0	0	0	0	0	0	0	0	0	0	0	0	0	0	0	0	0	0	0	0	0	0	0	0	0	0	0	0	0.004	0.007	0.002	0.004	0.001	0.001	0.008
Rhodoplanes sp. Z2-YC6860	0	0	0	0	0	0	0	0	0	0	0	0	0	0	0	0	0	0	0	0	0	0	0.01	0	0	0	0	0	0	0	0.01	0	0	0	0	0	0.01	0	0	0	0	0	0.003	0.005	0.001	0.001	0.001	0.001	0.006
Breoghania sp. L-A4	0	0	0	0	0	0	0	0	0	0	0	0	0	0	0	0	0	0	0	0	0	0	0.01	0	0	0	0	0	0	0	0.01	0	0	0	0	0	0.01	0	0	0	0	0	0.002	0.003	0.001	0.001	1e-05	0.001	0.003
Rhodobacteraceae bacterium	0	0	0	0	0	0	0	0	0.01	0	0	0	0	0	0	0	0	0	0	0	0	0	0.01	0	0	0	0	0	0	0	0	0	0	0	0	0	0.01	0	0	0	0	0	0.001	0.001	0.001	0.001	0.003	0.001	0.001
Octadecabacter temperatus	0	0	0	0	0	0	0	0	0	0	0	0	0	0	0	0	0	0	0	0	0	0	0.01	0	0	0	0	0	0	0	0.01	0	0	0	0	0	0.01	0	0	0	0	0	0.001	0.002	0.001	0.001	0.001	0.001	0.002
Stappia sp. ES.058	0	0	0	0	0	0	0	0	0	0.01	0	0	0	0	0	0	0	0.01	0	0	0	0	0	0	0	0	0	0	0	0	0	0	0	0	0	0	0.01	0	0	0	0	0	0.002	0.002	0.001	0.001	0.002	0.002	0.002
Granulibacter bethesdensis	0	0	0	0	0	0	0	0	0	0	0	0	0	0	0	0	0.01	0	0	0	0	0	0	0	0	0	0	0	0	0	0.01	0	0	0	0	0	0	0.01	0	0	0	0	0.003	0.004	0.001	0.002	0.003	0.001	0.005
Commensalibacter sp. AMU001	0	0	0	0	0.02	0	0	0	0	0	0	0	0	0	0	0	0	0	0	0	0	0	0	0	0	0.01	0	0	0	0	0	0	0	0	0	0	0	0	0	0	0	0	0.002	0.001	0.001	1e-05	1e-05	1e-05	0.001
Sphingomonas sp. IC081	0	0	0	0	0	0	0	0	0.01	0	0	0	0	0	0	0	0	0	0	0	0	0	0.01	0	0	0	0	0	0	0	0	0	0	0	0	0	0.01	0	0	0	0	0	0.003	0.003	0.002	0.003	0.001	0.001	0.005
Brevundimonas sp. GW460-12-10-14-LB2	0	0	0	0	0	0	0	0	0.01	0	0	0	0	0	0	0	0	0	0	0	0	0	0.01	0	0	0	0	0	0	0	0	0	0	0	0	0	0.01	0	0	0	0	0	1e-05	0.003	0.001	1e-05	1e-05	1e-05	0.003
Candidatus Pelagibacter sp. IMCC9063	0	0	0	0	0	0	0	0	0.01	0	0	0	0	0	0	0	0	0	0	0	0	0	0	0	0	0	0	0	0	0	0	0	0	0	0	0	0.02	0	0	0	0	0	0.001	0.004	1e-05	0.001	1e-05	1e-05	0.004
Cupriavidus pauculus	0	0	0	0	0	0	0	0	0.01	0	0	0	0	0	0	0	0	0	0	0	0	0	0.01	0	0	0	0	0	0	0	0	0	0	0	0	0	0.01	0	0	0	0	0	0.003	0.004	1e-05	0.001	0.001	0.001	0.005
Acidovorax sp. RAC01	0	0	0	0	0	0	0	0	0.01	0	0	0	0	0	0	0	0	0	0	0	0	0	0.01	0	0	0	0	0	0	0	0	0	0	0	0	0	0.01	0	0	0	0	0	0.001	0.006	0.002	0.001	0.002	0.001	0.006
Diaphorobacter polyhydroxybutyrativorans	0	0	0	0	0	0	0	0	0.01	0	0	0	0	0	0	0.01	0	0	0	0	0	0	0.01	0	0	0	0	0	0	0	0	0	0	0	0	0	0	0	0	0	0	0	0.001	1e-05	1e-05	1e-05	1e-05	1e-05	1e-05
Achromobacter sp. B7	0	0	0	0	0	0	0	0	0.01	0	0	0	0	0	0	0	0	0	0	0	0	0	0.01	0	0	0	0	0	0	0	0	0	0	0	0	0	0.01	0	0	0	0	0	0.001	0.001	0.002	0.001	0.001	0.001	0.002
Massilia plicata	0	0	0.01	0	0	0	0	0	0	0.01	0	0	0	0	0	0	0	0	0	0	0	0	0	0	0	0	0	0	0	0	0.01	0	0	0	0	0	0	0	0	0	0	0	0.001	0.002	0.001	0.002	0.003	1e-05	0.002
Undibacterium parvum	0	0	0.01	0	0	0	0	0	0	0.01	0	0	0	0	0	0	0	0	0	0	0	0	0	0	0	0	0	0	0	0	0.01	0	0	0	0	0	0	0	0	0	0	0	0.002	0.004	0.002	0.001	0.002	0.001	0.004
Neisseria elongata	0	0	0	0	0	0	0.01	0	0	0	0	0	0	0	0	0	0	0	0	0	0.01	0	0	0	0	0.01	0	0	0	0	0	0	0	0	0	0	0	0	0	0	0	0	0.002	0.003	0.002	0.002	0.002	0.002	0.004
Neisseria animalis	0	0	0	0	0	0	0	0	0	0	0	0	0	0	0	0	0	0	0	0	0	0	0.01	0	0	0	0	0	0	0	0.01	0	0	0	0	0	0.01	0	0	0	0	0	0.002	0.002	0.001	0.001	0.002	0.001	0.002
Aromatoleum aromaticum	0	0	0	0	0	0	0	0	0.01	0	0	0	0	0	0	0	0	0	0	0	0	0	0.01	0	0	0	0	0	0	0	0	0	0	0	0	0	0.01	0	0	0	0	0	0.001	0.008	0.001	0.002	0.001	0.001	0.008
Simkania negevensis	0	0	0	0	0	0	0	0	0.01	0	0	0	0	0	0	0	0	0	0	0	0	0	0.01	0	0	0	0	0	0	0	0	0	0	0	0	0	0.01	0	0	0	0	0	0.001	0.002	1e-05	0.001	1e-05	1e-05	0.002
Leptospira interrogans	0	0	0	0	0	0	0	0	0	0	0	0	0	0.01	0	0	0	0	0	0	0	0	0.01	0	0	0	0	0	0	0	0	0	0	0	0	0	0.01	0	0	0	0	0	0.002	0.006	0.002	0.002	0.001	0.002	0.005
Turneriella parva	0	0	0	0	0	0	0	0	0	0	0	0	0	0	0	0	0	0	0	0	0	0	0.01	0	0	0	0	0	0	0	0.01	0	0	0	0	0	0.01	0	0	0	0	0	0.001	0.006	1e-05	0.001	1e-05	1e-05	0.005
Thermotoga sp. 2812B	0	0	0.01	0	0	0	0	0	0	0.01	0	0	0	0	0	0	0.01	0	0	0	0	0	0	0	0	0	0	0	0	0	0	0	0	0	0	0	0	0	0	0	0	0	1e-05	1e-05	1e-05	1e-05	1e-05	1e-05	1e-05
Acidobacterium capsulatum	0	0	0.01	0	0	0	0	0	0	0.01	0	0	0	0	0	0	0	0	0	0	0	0	0	0	0	0	0	0	0	0	0.01	0	0	0	0	0	0	0	0	0	0	0	0.003	0.007	0.002	0.002	0.001	0.001	0.008
Nitrospira moscoviensis	0	0	0.01	0	0	0	0	0	0	0.01	0	0	0	0	0	0	0	0	0	0	0	0	0	0	0	0	0	0	0	0	0.01	0	0	0	0	0	0	0	0	0	0	0	0.001	0.003	0.001	0.002	0.001	0.001	0.003
Streptomyces sp. CC0208	0	0	0	0	0	0	0	0	0	0	0	0	0	0	0	0	0.01	0	0	0	0	0.01	0	0.01	0	0	0	0	0	0	0	0	0	0	0	0	0	0	0	0	0	0	1e-05	1e-05	1e-05	1e-05	1e-05	1e-05	1e-05
Enterobacter sp. CRENT-193	0	0	0	0	0	0	0	0	0	0	0	0	0	0	0	0.01	0	0	0	0	0	0	0.02	0	0	0	0	0	0	0	0	0	0	0	0	0	0	0	0	0	0	0	1e-05	1e-05	1e-05	1e-05	1e-05	1e-05	1e-05
Salmonella sp. SSDFZ54	0	0	0	0	0	0	0	0	0	0	0	0	0	0	0	0	0	0	0	0	0	0	0.03	0	0	0	0	0	0	0	0	0	0	0	0	0	0	0	0	0	0	0	1e-05	1e-05	1e-05	1e-05	1e-05	1e-05	1e-05
Citrobacter freundii complex sp. CFNIH3	0	0	0	0	0	0	0	0	0	0	0	0	0	0	0	0.01	0	0	0	0	0.02	0	0	0	0	0	0	0	0	0	0	0	0	0	0	0	0	0	0	0	0	0	0.002	0.001	1e-05	1e-05	0.001	1e-05	1e-05
Citrobacter sp. CFNIH10	0	0	0	0	0.01	0	0.01	0	0	0	0	0	0	0	0	0.01	0	0	0	0	0	0	0	0	0	0	0	0	0	0	0	0	0	0	0	0	0	0	0	0	0	0	1e-05	0.001	1e-05	1e-05	1e-05	1e-05	0.001
Citrobacter sp. ABFQG	0	0	0	0	0	0	0	0	0	0	0	0	0	0	0	0.03	0	0	0	0	0	0	0	0	0	0	0	0	0	0	0	0	0	0	0	0	0	0	0	0	0	0	1e-05	1e-05	1e-05	1e-05	1e-05	1e-05	1e-05
Halanaerobium hydrogeniformans	0.01	0	0	0	0	0	0	0	0	0	0	0	0	0	0	0	0	0	0	0	0	0	0	0	0	0	0	0.01	0	0	0	0	0	0	0	0	0	0	0	0	0	0	0.003	0.003	0.005	0.001	0.005	0.002	0.003
Halobacteroides halobius	0.01	0	0	0	0	0	0	0	0	0	0	0	0	0	0	0	0	0	0	0	0	0	0	0	0	0	0	0	0.01	0	0	0	0	0	0	0	0	0	0	0	0	0	0.002	0.005	0.007	0.002	0.004	0.003	0.003
Aerococcus viridans	0.01	0	0	0	0	0	0	0	0	0	0	0	0	0	0	0	0	0	0	0	0	0	0	0	0	0	0	0	0.01	0	0	0	0	0	0	0	0	0	0	0	0	0	0.001	0.003	0.005	0.001	0.001	0.001	0.003
Bacillus filamentosus	0.01	0	0	0	0	0	0	0	0	0	0	0	0	0	0	0	0	0	0	0	0	0	0	0	0	0	0	0	0.01	0	0	0	0	0	0	0	0	0	0	0	0	0	0.002	0.009	0.006	0.002	0.003	0.003	0.008
Bacillus asahii	0.01	0	0	0	0	0	0	0	0	0	0	0	0	0	0	0	0	0	0	0	0	0	0	0	0	0	0	0	0.01	0	0	0	0	0	0	0	0	0	0	0	0	0	0.003	0.003	0.005	0.002	0.002	0.002	0.003
Lysinibacillus timonensis	0.01	0	0	0	0	0	0	0	0	0	0	0	0	0	0	0	0	0.01	0	0	0	0	0	0	0	0	0	0	0	0	0	0	0	0	0	0	0	0	0	0	0	0	0.003	0.003	0.004	0.002	0.002	0.003	0.003
Sporosarcina psychrophila	0.01	0	0	0	0	0	0	0	0	0	0	0	0	0	0	0	0	0	0	0	0	0	0	0	0	0	0	0	0	0	0	0	0	0	0	0	0	0	0.01	0	0	0	0.004	0.007	0.005	0.001	0.002	0.003	0.005
Caminibacter mediatlanticus	0.01	0	0	0	0	0	0	0.01	0	0	0	0	0	0	0	0	0	0	0	0	0	0	0	0	0	0	0	0	0	0	0	0	0	0	0	0	0	0	0	0	0	0	0.003	0.005	0.004	0.001	0.001	0.003	0.004
Akkermansia glycaniphila	0.01	0	0	0	0	0	0	0	0	0.01	0	0	0	0	0	0	0	0	0	0	0	0	0	0	0	0	0	0	0	0	0	0	0	0	0	0	0	0	0	0	0	0	0.003	0.005	0.001	0.003	0.006	0.001	0.005
Fusobacterium hwasookii	0.01	0	0	0.01	0	0	0	0	0	0	0	0	0	0	0	0	0	0	0	0	0	0	0	0	0	0	0	0	0	0	0	0	0	0	0	0	0	0	0	0	0	0	0.002	0.003	0.002	0.001	0.003	0.001	0.002
Brachyspira murdochii	0.01	0	0	0	0	0	0	0	0	0	0	0	0	0	0	0	0	0	0	0	0	0	0	0	0	0	0	0	0	0	0	0	0	0	0	0	0.01	0	0	0	0	0	0.002	0.004	0.005	0.002	0.002	0.002	0.003
Clostridium autoethanogenum	0	0	0.01	0	0	0	0	0	0	0.01	0	0	0	0	0	0	0	0	0	0	0	0	0	0	0	0	0	0	0	0	0	0	0	0	0	0	0	0	0	0	0	0	0.001	0.002	0.001	0.001	1e-05	0.001	0.001
Thermaerobacter marianensis	0	0	0	0	0	0	0	0	0	0	0	0	0	0	0	0	0	0.01	0	0	0	0	0	0	0	0	0	0	0	0	0	0	0	0	0.01	0	0	0	0	0	0	0	0.004	0.003	0.002	0.001	0.002	0.002	0.004
Carboxydocella thermautotrophica	0	0	0	0	0	0	0	0	0	0	0	0	0	0	0	0	0	0.01	0	0	0	0	0	0	0	0	0	0	0	0	0	0	0	0	0	0	0	0.01	0	0	0	0	0.004	0.026	0.002	0.002	0.003	0.002	0.025
Caldicellulosiruptor lactoaceticus	0	0	0	0	0	0	0	0	0	0	0	0	0	0	0	0	0	0.02	0	0	0	0	0	0	0	0	0	0	0	0	0	0	0	0	0	0	0	0	0	0	0	0	1e-05	0.002	1e-05	1e-05	1e-05	0.001	0.002
Caldanaerobacter subterraneus	0	0	0	0	0	0	0	0	0	0	0	0	0	0.01	0	0	0	0	0	0	0	0	0	0	0	0	0	0.01	0	0	0	0	0	0	0	0	0	0	0	0	0	0	0.003	0.002	0.004	0.002	0.002	0.003	0.002
Halothermothrix orenii	0	0	0	0	0	0	0	0	0	0	0	0	0	0.01	0	0	0	0	0	0	0	0	0	0	0	0	0	0.01	0	0	0	0	0	0	0	0	0	0	0	0	0	0	0.004	0.004	0.002	0.001	0.002	0.001	0.003
Streptococcus sp. Z15	0	0	0	0	0	0	0	0	0	0	0	0	0	0	0	0	0	0.01	0	0	0	0	0	0	0	0	0	0	0	0	0.01	0	0	0	0	0	0	0	0	0	0	0	0.002	0.004	0.004	0.001	0.002	0.001	0.004
Streptococcus sp. 1643	0	0.01	0	0	0	0	0	0	0	0	0	0	0	0	0	0.01	0	0	0	0	0	0	0	0	0	0	0	0	0	0	0	0	0	0	0	0	0	0	0	0	0	0	1e-05	0.001	0.003	0.001	0.001	0.001	0.001
Streptococcus pseudopneumoniae	0	0	0	0	0	0	0	0	0	0	0	0	0	0	0	0.01	0	0	0	0	0	0	0	0	0	0	0	0	0	0	0	0	0	0	0	0	0.01	0	0	0	0	0	0.001	0.001	0.001	0.002	1e-05	1e-05	1e-05
Streptococcus macedonicus	0	0	0	0	0	0	0	0	0	0	0	0	0	0	0	0	0	0	0	0	0	0	0	0	0	0.01	0	0	0	0.01	0	0	0	0	0	0	0	0	0	0	0	0	1e-05	1e-05	0.005	0.001	1e-05	1e-05	1e-05
Lactobacillus paracasei	0	0	0.01	0	0	0	0	0	0	0	0	0	0	0	0	0	0.01	0	0	0	0	0	0	0	0	0	0	0	0	0	0	0	0	0	0	0	0	0	0	0	0	0	0.002	0.002	0.001	0.001	0.001	0.001	0.001
Lactobacillus parabuchneri	0	0	0	0	0	0	0	0	0	0	0	0	0	0	0	0	0	0	0	0	0	0	0.01	0	0	0	0	0	0	0	0	0	0	0	0	0	0.01	0	0	0	0	0	0.001	0.002	0.003	1e-05	0.001	0.001	0.003
Lactobacillus hordei	0	0	0	0	0	0	0	0	0	0	0	0	0	0	0	0	0	0.01	0	0	0	0	0	0	0	0	0	0	0	0	0	0	0	0	0	0	0	0	0.01	0	0	0	0.002	0.004	0.002	0.002	0.001	0.002	0.003
Lactobacillus buchneri	0	0	0	0	0	0	0	0	0	0.01	0	0	0	0	0	0	0	0	0	0	0	0	0	0	0	0	0	0	0	0	0.01	0	0	0	0	0	0	0	0	0	0	0	0.003	0.008	0.001	0.001	0.003	0.001	0.007
Lactobacillus zymae	0	0	0	0	0	0	0	0	0	0	0	0	0	0	0	0	0	0	0	0	0	0	0.01	0	0	0	0	0	0	0	0	0	0	0	0	0	0.01	0	0	0	0	0	0.001	0.002	0.001	1e-05	0.001	0.001	0.002
Lactobacillus oligofermentans	0	0	0	0	0	0	0	0	0	0	0	0	0	0	0	0	0	0	0	0	0	0	0.01	0	0	0	0	0	0	0	0	0	0	0	0	0	0.01	0	0	0	0	0	0.002	0.004	0.002	0.002	0.001	0.001	0.004
Lactobacillus murinus	0	0	0	0	0	0	0	0	0	0	0	0	0	0	0	0	0	0.01	0	0	0	0	0	0	0	0	0	0	0	0	0	0	0	0	0	0	0	0	0.01	0	0	0	0.001	0.001	0.001	0.001	0.001	0.001	0.001
Pediococcus pentosaceus	0	0	0	0	0	0	0	0	0	0	0	0	0	0	0	0	0	0	0	0	0	0	0.01	0	0	0	0	0	0	0	0	0	0	0	0	0	0.01	0	0	0	0	0	0.001	0.005	0.002	0.004	0.004	0.002	0.004
Enterococcus casseliflavus	0	0	0	0	0	0	0.01	0	0	0	0	0	0	0	0	0	0	0	0	0	0	0	0	0	0	0	0	0	0	0.01	0	0	0	0	0	0	0	0	0	0	0	0	0.002	0.002	0.002	0.001	0.001	0.001	0.002
Vagococcus penaei	0	0	0	0	0	0	0	0	0	0	0	0	0	0.01	0	0	0	0	0	0	0	0	0	0	0	0	0	0.01	0	0	0	0	0	0	0	0	0	0	0	0	0	0	0.003	0.003	0.005	0.001	0.002	0.001	0.003
Tetragenococcus osmophilus	0	0	0	0	0	0	0	0	0	0	0	0	0	0	0	0	0	0	0	0	0	0	0	0	0	0	0	0.01	0	0.01	0	0	0	0	0	0	0	0	0	0	0	0	0.001	0.001	0.002	0.001	0.001	1e-05	0.001
Weissella paramesenteroides	0	0	0	0	0	0	0	0	0	0	0	0	0	0	0.01	0.01	0	0	0	0	0	0	0	0	0	0	0	0	0	0	0	0	0	0	0	0	0	0	0	0	0	0	0.001	0.002	0.001	1e-05	1e-05	1e-05	0.002
Carnobacterium sp. 17-4	0	0	0	0	0	0	0	0	0	0	0	0	0	0.01	0	0	0	0	0	0	0	0	0	0	0	0	0	0.01	0	0	0	0	0	0	0	0	0	0	0	0	0	0	0.002	0.003	0.004	0.002	0.001	0.002	0.003
Jeotgalibaca sp. H21T32	0	0	0	0	0	0	0	0	0	0	0	0	0	0.01	0	0	0	0	0	0	0	0	0	0	0	0	0	0.01	0	0	0	0	0	0	0	0	0	0	0	0	0	0	0.003	0.005	0.004	0.003	0.002	0.002	0.003
Bacillus halotolerans	0	0	0	0	0	0	0	0	0	0	0	0	0	0	0	0	0	0.01	0	0	0	0	0	0	0	0	0	0	0	0	0	0	0	0	0	0	0	0	0.01	0	0	0	0.002	0.003	0.004	0.003	0.002	0.001	0.003
Bacillus paralicheniformis	0	0	0.01	0	0	0	0	0	0	0	0	0	0	0.01	0	0	0	0	0	0	0	0	0	0	0	0	0	0	0	0	0	0	0	0	0	0	0	0	0	0	0	0	0.002	0.002	0.002	0.001	0.002	0.001	0.002
Bacillus altitudinis	0	0	0	0	0	0	0	0.01	0	0	0	0	0	0	0	0	0	0.01	0	0	0	0	0	0	0	0	0	0	0	0	0	0	0	0	0	0	0	0	0	0	0	0	0.001	0.003	0.003	0.001	0.002	0.001	0.002
Bacillus lentus	0	0	0	0	0	0	0	0	0	0	0	0	0	0.01	0	0	0	0	0	0	0	0	0	0	0	0	0	0.01	0	0	0	0	0	0	0	0	0	0	0	0	0	0	0.003	0.004	0.004	0.002	0.001	0.003	0.003
Bacillus weihaiensis	0	0	0	0	0	0	0	0	0	0	0	0	0	0	0	0	0	0	0	0.01	0	0	0	0	0	0	0	0	0	0	0	0	0	0	0	0	0	0	0	0.01	0	0	0.002	0.012	0.003	0.002	0.003	0.002	0.01
Bacillus marisflavi	0	0	0	0	0	0	0	0	0	0	0	0	0	0	0	0	0	0.01	0	0	0	0	0	0	0	0	0	0	0	0	0	0	0	0	0	0	0	0	0.01	0	0	0	0.003	0.006	0.004	0.003	0.003	0.002	0.005
Bacillus smithii	0	0	0	0	0	0	0	0	0	0	0	0	0	0.01	0	0	0	0.01	0	0	0	0	0	0	0	0	0	0	0	0	0	0	0	0	0	0	0	0	0	0	0	0	0.002	0.003	0.002	0.002	0.002	0.001	0.002
Lysinibacillus sp. SGAir0095	0	0	0	0	0	0	0	0	0	0	0	0	0	0.01	0	0	0	0.01	0	0	0	0	0	0	0	0	0	0	0	0	0	0	0	0	0	0	0	0	0	0	0	0	0.003	0.004	0.005	0.002	0.002	0.002	0.004
Virgibacillus phasianinus	0	0	0	0	0	0	0	0	0	0	0	0	0	0	0	0	0	0.01	0	0	0	0	0	0	0	0	0	0	0	0	0	0	0	0	0	0	0	0	0.01	0	0	0	0.003	0.003	0.004	0.002	0.003	0.001	0.003
Virgibacillus necropolis	0	0	0	0	0	0	0	0	0	0	0	0	0	0.01	0	0	0	0	0	0	0	0	0	0	0	0	0	0	0	0	0	0	0	0	0	0	0	0	0.01	0	0	0	0.003	0.006	0.004	0.001	0.005	0.004	0.006
Virgibacillus sp. Bac332	0	0	0	0	0	0	0	0	0	0	0	0	0	0.01	0	0	0	0	0	0	0	0	0	0	0	0	0	0	0	0	0	0	0	0	0	0	0	0	0.01	0	0	0	0.003	0.002	0.004	0.004	0.003	0.002	0.002
Virgibacillus sp. 6R	0	0	0	0	0	0	0	0	0	0	0	0	0	0.01	0	0	0	0	0	0	0	0	0	0	0	0	0	0.01	0	0	0	0	0	0	0	0	0	0	0	0	0	0	0.003	0.005	0.001	0.002	0.004	0.002	0.004
Oceanobacillus sp. 160	0	0	0	0	0	0	0	0	0	0	0	0	0	0	0	0	0	0	0	0	0	0	0	0	0	0	0	0	0	0	0	0	0	0	0	0	0	0	0.01	0.01	0	0	0.004	0.005	0.004	0.003	0.002	0.003	0.003
Lentibacillus amyloliquefaciens	0	0	0	0	0	0	0	0	0	0	0	0	0	0.01	0	0	0	0.01	0	0	0	0	0	0	0	0	0	0	0	0	0	0	0	0	0	0	0	0	0	0	0	0	0.002	0.002	0.004	0.001	0.003	0.002	0.001
Paenibacillus sp. IHBB 10380	0	0	0	0	0	0	0	0	0	0	0	0	0	0.01	0	0	0	0.01	0	0	0	0	0	0	0	0	0	0	0	0	0	0	0	0	0	0	0	0	0	0	0	0	0.004	0.004	0.006	0.002	0.002	0.003	0.003
Paenibacillus sp. BIHB4019	0	0	0	0	0	0	0	0	0	0	0	0	0	0	0	0	0	0.01	0	0	0	0	0	0	0	0	0	0	0	0	0	0	0	0	0	0	0	0	0.01	0	0	0	0.004	0.005	0.004	0.003	0.002	0.004	0.005
Paenibacillus baekrokdamisoli	0	0	0	0	0	0	0	0	0	0	0	0	0	0	0	0	0	0.01	0	0	0	0	0	0	0	0	0	0	0	0	0	0	0	0	0	0	0	0	0.01	0	0	0	0.004	0.003	0.003	0.002	0.005	0.003	0.004
Paenibacillus alvei	0	0	0	0	0	0	0	0	0	0	0	0	0	0	0	0	0	0.01	0	0	0	0	0	0	0	0	0	0	0	0	0	0	0	0	0	0	0	0	0.01	0	0	0	0.004	0.005	0.003	0.002	0.003	0.003	0.004
Paenibacillus yonginensis	0	0	0	0	0	0	0	0	0	0	0	0	0	0	0	0	0.01	0.01	0	0	0	0	0	0	0	0	0	0	0	0	0	0	0	0	0	0	0	0	0	0	0	0	0.004	0.005	0.003	0.003	0.006	0.003	0.005
Cohnella sp. 18JY8-7	0	0	0	0	0	0	0	0.01	0	0	0	0	0	0	0	0	0	0	0	0	0	0	0	0	0	0	0	0	0.01	0	0	0	0	0	0	0	0	0	0	0	0	0	0.007	0.005	0.003	0.003	0.003	0.002	0.007
Aneurinibacillus soli	0	0	0	0.01	0	0	0	0	0	0	0	0	0	0	0	0	0	0	0	0	0	0	0	0	0	0	0	0	0	0	0	0	0	0	0	0	0	0	0.01	0	0	0	0.004	0.005	0.003	0.002	0.003	0.003	0.005
Staphylococcus stepanovicii	0	0	0	0	0	0	0	0	0	0	0	0	0	0	0	0	0	0	0	0	0	0	0.01	0	0	0	0	0	0	0	0	0	0	0	0	0	0.01	0	0	0	0	0	0.002	0.006	0.006	0.001	0.002	0.002	0.004
Staphylococcus haemolyticus	0	0	0	0	0	0	0	0	0	0	0	0	0	0	0	0	0	0	0	0	0	0	0.01	0	0	0	0	0	0	0	0	0	0	0	0	0	0.01	0	0	0	0	0	0.002	0.002	0.004	0.001	0.002	0.001	0.002
Staphylococcus hominis	0	0	0	0	0	0	0	0	0	0	0	0	0	0	0	0	0	0	0	0	0	0	0.01	0	0	0	0	0	0	0	0	0	0	0	0	0	0.01	0	0	0	0	0	0.003	0.003	0.005	0.001	0.001	0.002	0.002
Paenisporosarcina antarctica	0	0	0	0	0	0	0	0	0	0	0	0	0	0	0	0	0	0	0	0	0.01	0	0	0	0	0	0	0	0	0	0	0	0	0	0	0	0.01	0	0	0	0	0	0.003	0.003	0.002	0.001	0.003	0.001	0.003
Erysipelothrix rhusiopathiae	0	0	0	0	0	0	0	0	0	0	0	0	0	0	0	0	0	0.01	0	0	0	0	0	0	0	0	0	0	0	0	0	0	0	0	0	0	0	0	0.01	0	0	0	0.002	0.006	0.003	0.004	0.003	0.001	0.004
Erysipelothrix larvae	0	0	0	0	0	0	0	0	0	0	0	0	0	0.01	0	0	0	0	0	0	0	0	0	0	0	0	0	0.01	0	0	0	0	0	0	0	0	0	0	0	0	0	0	0.002	0.005	0.004	0.002	0.002	0.002	0.005
Erysipelothrix sp. 15TAL0474	0	0	0	0	0	0	0	0	0	0	0	0	0	0	0	0	0	0.01	0	0	0	0	0	0	0	0	0	0	0	0	0	0	0	0	0	0	0	0	0.01	0	0	0	0.002	0.002	0.003	0.002	0.002	0.001	0.002
Streptomyces sp. S1D4-14	0	0	0	0	0	0	0.01	0	0	0	0	0	0	0	0	0	0	0	0	0	0.01	0	0	0	0	0	0	0	0	0	0	0	0	0	0	0	0	0	0	0	0	0	1e-05	1e-05	1e-05	1e-05	1e-05	1e-05	0.001
Corynebacterium testudinoris	0	0	0	0	0	0	0	0	0	0.01	0	0	0	0	0	0	0	0	0	0	0	0	0	0	0	0	0	0	0	0	0.01	0	0	0	0	0	0	0	0	0	0	0	0.001	0.001	0.001	0.001	0.001	1e-05	0.002
Corynebacterium ammoniagenes	0	0	0	0	0	0	0.01	0	0	0	0	0	0	0	0	0	0	0	0	0.01	0	0	0	0	0	0	0	0	0	0	0	0	0	0	0	0	0	0	0	0	0	0	0.001	0.001	1e-05	1e-05	0.001	1e-05	0.002
Mycobacterium tuberculosis	0	0	0	0	0	0	0	0.01	0	0	0	0	0	0	0.01	0	0	0	0	0	0	0	0	0	0	0	0	0	0	0	0	0	0	0	0	0	0	0	0	0	0	0	1e-05	1e-05	1e-05	1e-05	1e-05	1e-05	1e-05
Rhodococcus opacus	0	0	0	0	0	0	0	0	0	0	0	0	0	0	0	0	0	0.01	0	0	0	0	0	0	0	0	0	0	0	0	0	0	0	0	0	0	0	0	0.01	0	0	0	0.004	0.006	0.002	0.003	0.007	0.002	0.008
Agromyces sp. MF30-A	0	0	0	0	0	0	0	0	0	0	0	0	0	0	0	0	0	0	0	0	0	0	0.01	0	0	0	0	0	0	0	0	0	0	0	0	0	0.01	0	0	0	0	0	0.001	0.006	1e-05	0.001	0.001	1e-05	0.006
Cryobacterium sp. GCJ02	0	0	0.01	0	0	0	0	0	0	0.01	0	0	0	0	0	0	0	0	0	0	0	0	0	0	0	0	0	0	0	0	0	0	0	0	0	0	0	0	0	0	0	0	0.001	0.001	0.002	0.001	0.001	0.001	0.001
Glutamicibacter halophytocola	0	0	0	0	0	0	0	0	0	0.01	0	0	0	0	0	0	0	0	0	0	0	0	0	0	0	0	0	0	0	0	0.01	0	0	0	0	0	0	0	0	0	0	0	0.001	0.004	1e-05	1e-05	0.001	0.001	0.004
Psychromicrobium lacuslunae	0	0	0	0	0	0	0	0	0	0	0	0	0	0	0	0	0	0	0	0	0	0	0.01	0	0	0	0	0	0	0	0	0	0	0	0	0	0.01	0	0	0	0	0	0.001	0.001	0.001	0.001	0.001	1e-05	0.001
Brevibacterium sandarakinum	0	0	0	0	0	0	0	0	0	0	0	0	0	0	0	0	0	0	0	0	0	0	0.01	0	0	0	0	0	0	0	0	0	0	0	0	0	0.01	0	0	0	0	0	0.001	0.005	1e-05	0.001	0.001	0.001	0.005
Actinomyces sp. oral taxon 848	0	0	0	0	0	0	0	0	0	0	0	0	0	0	0	0	0	0	0	0	0	0	0	0	0	0	0	0	0	0	0	0	0	0	0.01	0	0	0	0	0.01	0	0	0.001	0.003	0.001	0.001	1e-05	1e-05	0.003
Trueperella bialowiezensis	0	0	0	0	0	0	0	0	0	0	0	0	0	0	0	0	0	0	0	0	0	0	0.01	0	0	0	0	0	0	0	0	0	0	0	0	0	0.01	0	0	0	0	0	0.001	0.003	1e-05	1e-05	0.001	1e-05	0.004
Actinotignum schaalii	0	0	0	0	0	0	0	0	0	0	0	0	0	0	0	0	0	0	0	0	0	0	0.01	0	0	0	0	0	0	0	0	0	0	0	0	0	0.01	0	0	0	0	0	0.001	0.002	1e-05	1e-05	1e-05	1e-05	0.002
Tessaracoccus timonensis	0	0	0	0	0	0	0	0	0	0	0	0	0	0	0	0	0	0	0	0	0	0	0.01	0	0	0	0	0	0	0	0	0	0	0	0	0	0.01	0	0	0	0	0	0.002	0.004	0.001	1e-05	0.001	0.001	0.004
Propionimicrobium sp. Marseille-P3275	0	0	0	0	0	0	0	0	0	0	0	0	0	0	0	0	0	0.01	0	0	0	0	0	0	0	0	0	0	0	0	0	0	0	0	0	0	0	0	0.01	0	0	0	0.002	0.002	0.002	0.001	0.001	0.003	0.001
Actinoplanes sp. OR16	0	0	0	0	0	0	0	0	0	0	0	0	0	0	0	0.01	0	0.01	0	0	0	0	0	0	0	0	0	0	0	0	0	0	0	0	0	0	0	0	0	0	0	0	0.003	0.004	0.002	0.002	0.003	0.003	0.006
Pseudonocardia autotrophica	0	0	0	0	0	0	0	0	0	0	0	0	0	0	0	0	0	0	0	0	0	0	0	0	0	0	0	0	0	0	0.01	0	0	0	0	0	0.01	0	0	0	0	0	0.003	0.002	0.001	0.001	0.001	0.001	0.003
Candidatus Planktophila versatilis	0	0	0	0	0	0	0	0	0	0.01	0	0	0	0	0	0	0	0	0	0	0	0	0	0	0	0	0	0	0	0	0	0	0	0	0	0	0.01	0	0	0	0	0	1e-05	0.002	0.001	0.001	0.001	1e-05	0.002
Frankia sp. EAN1pec	0	0	0.01	0	0	0	0	0	0	0.01	0	0	0	0	0	0	0	0	0	0	0	0	0	0	0	0	0	0	0	0	0	0	0	0	0	0	0	0	0	0	0	0	0.003	0.004	0.001	0.002	0.002	0.001	0.004
Microchaete diplosiphon	0	0	0	0	0.01	0	0	0	0	0	0	0	0	0	0	0	0	0	0	0	0	0	0	0	0	0.01	0	0	0	0	0	0	0	0	0	0	0	0	0	0	0	0	0.001	1e-05	0.001	0.001	0.003	1e-05	0.001
Geminocystis herdmanii	0	0	0.01	0	0	0	0	0	0	0.01	0	0	0	0	0	0	0	0	0	0	0	0	0	0	0	0	0	0	0	0	0	0	0	0	0	0	0	0	0	0	0	0	0.002	0.002	0.001	0.001	0.001	0.001	0.002
Oscillatoria acuminata	0	0	0	0	0	0	0	0	0	0	0	0	0	0	0	0	0	0	0	0	0	0	0	0	0	0	0	0	0	0	0.01	0	0	0	0	0	0.01	0	0	0	0	0	0.001	0.005	0.001	0.001	0.001	0.001	0.005
Synechococcus sp. JA-3-3Ab	0	0	0	0	0	0	0	0	0	0	0	0	0	0	0	0	0	0	0	0	0	0	0.01	0	0	0	0	0	0	0	0	0	0	0	0	0	0.01	0	0	0	0	0	0.001	0.004	1e-05	0.001	1e-05	0.001	0.004
Synechococcus sp. PCC 7003	0	0	0	0	0	0	0	0	0	0	0	0	0	0	0	0	0	0.01	0	0	0	0	0	0	0	0	0	0	0	0	0	0	0	0	0	0	0	0	0.01	0	0	0	0.001	0.001	0.001	1e-05	0.001	0.001	0.001
Synechococcus sp. WH 8109	0	0	0	0	0	0	0	0	0	0	0	0	0	0	0	0	0	0	0	0	0	0	0.01	0	0	0	0	0	0	0	0	0	0	0	0	0	0.01	0	0	0	0	0	0.003	0.004	1e-05	1e-05	0.001	0.001	0.005
Synechococcus sp. RCC307	0	0	0	0	0	0	0	0	0	0	0	0	0	0	0	0	0	0	0	0	0	0	0.01	0	0	0	0	0	0	0	0	0	0	0	0	0	0.01	0	0	0	0	0	0.001	0.004	1e-05	0.001	0.001	1e-05	0.004
Spiroplasma syrphidicola	0	0	0	0	0	0	0	0	0	0	0	0	0	0	0	0	0	0	0	0	0	0	0.01	0	0	0	0	0	0	0	0	0	0	0	0	0	0.01	0	0	0	0	0	0.001	0.004	0.003	0.001	0.002	1e-05	0.003
Meiothermus silvanus	0	0	0.01	0	0	0	0	0	0	0.01	0	0	0	0	0	0	0	0	0	0	0	0	0	0	0	0	0	0	0	0	0	0	0	0	0	0	0	0	0	0	0	0	0.001	0.001	1e-05	0.001	0.001	0.001	0.001
Anaerolineaceae bacterium oral taxon 439	0	0	0	0	0	0	0	0	0	0	0	0	0	0	0	0	0	0	0	0	0	0	0	0	0	0	0	0	0	0	0	0	0	0	0.01	0	0	0.01	0	0	0	0	0.005	0.004	0.003	0.002	0.003	0.002	0.005
Chryseobacterium piperi	0	0	0	0	0	0	0	0	0	0	0	0.01	0	0	0	0	0	0	0	0	0	0	0	0	0	0	0	0	0	0	0	0	0.01	0	0	0	0	0	0	0	0	0	0.003	0.005	0.003	0.003	0.004	0.002	0.005
Chryseobacterium sp. T16E-39	0	0	0	0	0	0	0	0	0	0	0	0.01	0	0	0	0	0	0	0	0	0	0	0	0	0	0	0	0	0	0	0	0	0	0	0	0	0	0	0.01	0	0	0	0.004	0.005	0.003	0.006	0.006	0.003	0.005
Elizabethkingia sp. JS20170427COW	0	0	0	0	0	0	0	0	0	0	0	0.01	0	0	0	0	0	0	0	0	0	0	0	0	0	0	0	0	0	0	0	0	0.01	0	0	0	0	0	0	0	0	0	0.001	0.006	0.002	0.003	0.005	0.003	0.007
Tenacibaculum dicentrarchi	0	0	0.01	0	0	0	0	0	0	0.01	0	0	0	0	0	0	0	0	0	0	0	0	0	0	0	0	0	0	0	0	0	0	0	0	0	0	0	0	0	0	0	0	0.002	0.002	0.004	0.002	0.004	0.001	0.002
Winogradskyella sp. PC-19	0	0	0	0	0	0	0	0	0	0	0	0.01	0	0	0	0	0	0	0	0	0	0	0	0	0	0	0	0	0	0	0	0	0	0	0	0	0.01	0	0	0	0	0	0.001	0.005	0.001	0.002	0.001	0.001	0.004
Myroides profundi	0	0	0	0	0	0	0	0	0	0	0	0	0	0	0	0	0	0	0	0	0	0	0.01	0	0	0	0	0	0	0	0	0	0	0	0	0	0.01	0	0	0	0	0	1e-05	0.005	0.001	0.002	1e-05	1e-05	0.004
Myroides sp. ZB35	0	0	0.01	0	0	0	0	0	0	0.01	0	0	0	0	0	0	0	0	0	0	0	0	0	0	0	0	0	0	0	0	0	0	0	0	0	0	0	0	0	0	0	0	1e-05	0.001	1e-05	1e-05	1e-05	0.001	0.001
Gillisia sp. Hel1_33_143	0	0	0	0	0	0	0	0	0	0	0	0	0	0	0	0	0	0	0	0	0	0	0.01	0	0	0	0	0	0	0	0	0	0	0	0	0	0.01	0	0	0	0	0	0.002	0.002	0.001	0.002	0.001	1e-05	0.001
Blattabacterium sp. (Cryptocercus kyebangensis)	0	0	0.01	0	0	0	0	0	0	0.01	0	0	0	0	0	0	0	0	0	0	0	0	0	0	0	0	0	0	0	0	0	0	0	0	0	0	0	0	0	0	0	0	0.001	0.005	0.001	1e-05	1e-05	1e-05	0.004
Fluviicola taffensis	0	0	0	0	0	0	0	0	0	0	0	0	0	0	0	0	0	0	0	0	0	0	0	0	0	0	0	0	0	0	0.01	0	0	0	0	0	0	0	0	0.01	0	0	0.002	0.014	0.006	0.004	0.003	0.002	0.013
Prosthecochloris sp. GSB1	0	0	0	0	0	0	0	0	0	0	0	0	0	0	0	0	0	0	0	0	0	0	0.01	0	0	0	0	0	0	0	0	0	0	0	0	0	0.01	0	0	0	0	0	0.002	0.002	0.001	0.001	0.003	1e-05	0.003
Klebsiella sp. WCHKl090001	0	0	0	0	0	0	0	0	0	0	0	0	0	0	0	0.01	0	0	0	0	0	0	0	0	0	0	0	0	0	0.01	0	0	0	0	0	0	0	0	0	0	0	0	0.002	0.003	0.002	0.002	0.004	0.003	0.003
Enterobacter soli	0	0	0	0	0	0	0	0	0	0	0	0	0	0	0	0.02	0	0	0	0	0	0	0	0	0	0	0	0	0	0	0	0	0	0	0	0	0	0	0	0	0	0	0.002	0.001	0.001	0.003	0.001	1e-05	0.001
Citrobacter braakii	0	0	0	0	0	0	0	0	0	0	0	0	0	0	0	0.02	0	0	0	0	0	0	0	0	0	0	0	0	0	0	0	0	0	0	0	0	0	0	0	0	0	0	0.005	1e-05	1e-05	1e-05	1e-05	0.001	1e-05
Citrobacter farmeri	0	0	0	0	0	0	0	0	0	0	0	0	0	0	0	0.01	0	0	0	0	0	0	0	0	0	0	0	0	0	0	0	0	0.01	0	0	0	0	0	0	0	0	0	0.003	0.001	0.002	0.001	0.002	0.002	0.001
Citrobacter sp. LY-1	0	0	0	0	0	0	0	0	0	0	0	0	0	0	0	0.01	0	0	0	0	0	0	0	0	0	0	0	0	0	0	0	0	0	0	0	0	0	0	0	0	0.01	0	0.002	0.002	1e-05	0.001	0.002	0.001	0.002
Candidatus Gullanella endobia	0	0	0	0	0	0	0	0	0	0	0	0	0	0	0	0	0	0	0	0	0	0	0.01	0	0	0	0	0	0	0	0	0	0	0	0	0	0.01	0	0	0	0	0	0.001	0.005	0.001	1e-05	0.001	1e-05	0.005
Cronobacter malonaticus	0	0	0	0	0	0	0	0	0	0	0	0	0	0	0	0	0	0	0	0	0.02	0	0	0	0	0	0	0	0	0	0	0	0	0	0	0	0	0	0	0	0	0	0.001	1e-05	0.001	0.001	0.001	0.001	0.001
Kosakonia sacchari	0	0	0	0	0	0	0	0	0	0	0	0	0	0	0	0	0	0	0	0	0	0	0.01	0	0	0	0	0	0	0	0	0	0	0	0	0	0.01	0	0	0	0	0	0.001	0.001	0.001	1e-05	0.001	0.002	0.001
Raoultella planticola	0	0	0	0	0	0	0	0	0	0	0	0	0	0	0	0.01	0	0	0	0	0	0	0	0	0	0	0	0	0	0.01	0	0	0	0	0	0	0	0	0	0	0	0	0.002	0.002	0.001	0.001	0.002	0.001	0.002
Shigella sonnei	0	0	0	0	0	0	0	0	0	0.01	0	0	0	0.01	0	0	0	0	0	0	0	0	0	0	0	0	0	0	0	0	0	0	0	0	0	0	0	0	0	0	0	0	0.001	1e-05	1e-05	1e-05	1e-05	1e-05	1e-05
Yersinia enterocolitica	0	0	0	0	0	0	0	0	0	0	0	0	0	0.01	0	0	0	0	0	0	0	0	0	0	0	0	0	0.01	0	0	0	0	0	0	0	0	0	0	0	0	0	0	0.005	0.007	0.003	0.002	0.005	0.003	0.007
Providencia rettgeri	0	0	0.01	0	0	0	0	0	0	0.01	0	0	0	0	0	0	0	0	0	0	0	0	0	0	0	0	0	0	0	0	0	0	0	0	0	0	0	0	0	0	0	0	0.003	0.003	0.003	0.002	0.005	0.002	0.003
Photorhabdus asymbiotica	0	0	0	0	0	0	0	0	0	0	0	0	0	0	0	0	0	0	0	0	0	0	0.01	0	0	0	0	0	0	0	0	0	0	0	0	0	0.01	0	0	0	0	0	0.001	0.008	0.001	0.001	0.003	0.001	0.007
Erwinia persicina	0	0	0	0	0	0	0	0	0	0	0	0	0	0	0	0	0	0	0	0	0	0	0.01	0	0	0	0	0	0	0	0	0	0	0	0	0	0.01	0	0	0	0	0	0.003	0.007	0.004	0.001	0.003	0.001	0.008
Edwardsiella ictaluri	0	0	0.01	0	0	0	0	0	0	0.01	0	0	0	0	0	0	0	0	0	0	0	0	0	0	0	0	0	0	0	0	0	0	0	0	0	0	0	0	0	0	0	0	0.001	0.001	1e-05	0.001	0.001	1e-05	0.001
Pragia fontium	0	0	0	0	0	0	0	0	0	0	0	0	0	0	0	0	0	0	0	0	0	0	0.01	0	0	0	0	0	0	0	0	0	0	0	0	0	0.01	0	0	0	0	0	0.002	0.005	0.002	0.001	0.003	0.001	0.004
Actinobacillus pleuropneumoniae	0	0	0.01	0	0	0	0	0	0	0	0	0	0	0	0	0	0.01	0	0	0	0	0	0	0	0	0	0	0	0	0	0	0	0	0	0	0	0	0	0	0	0	0	0.002	0.004	0.001	0.001	0.002	0.001	0.004
Glaesserella sp. 15-184	0	0	0.01	0	0	0	0	0	0	0.01	0	0	0	0	0	0	0	0	0	0	0	0	0	0	0	0	0	0	0	0	0	0	0	0	0	0	0	0	0	0	0	0	0.001	0.005	0.001	0.001	0.001	0.001	0.003
Pseudomonas protegens	0	0	0	0	0	0	0	0	0	0.01	0	0	0	0	0	0	0	0	0	0	0	0	0	0	0	0	0	0	0	0	0	0	0	0	0	0	0	0	0.01	0	0	0	0.003	0.01	0.003	0.002	0.003	0.003	0.009
Pseudomonas citronellolis	0	0	0.01	0	0	0	0	0	0	0.01	0	0	0	0	0	0	0	0	0	0	0	0	0	0	0	0	0	0	0	0	0	0	0	0	0	0	0	0	0	0	0	0	0.003	0.004	0.002	0.002	0.001	0.001	0.006
Pseudomonas sp. HLS-6	0	0	0	0	0	0	0	0	0	0	0	0	0	0	0	0	0	0	0	0	0	0	0.01	0	0	0	0	0	0	0	0	0	0	0	0	0	0.01	0	0	0	0	0	0.001	0.006	0.001	1e-05	1e-05	1e-05	0.005
Acinetobacter ursingii	0	0	0.01	0	0	0	0	0	0	0.01	0	0	0	0	0	0	0	0	0	0	0	0	0	0	0	0	0	0	0	0	0	0	0	0	0	0	0	0	0	0	0	0	0.001	0.001	0.002	0.001	0.002	0.001	0.001
Acinetobacter schindleri	0	0	0	0	0	0	0	0	0	0	0	0	0	0	0	0	0	0.01	0	0	0	0	0	0	0	0	0	0	0	0	0	0	0	0	0	0	0	0	0.01	0	0	0	0.002	0.004	0.003	0.001	0.002	0.002	0.005
Marinobacter sp. Arc7-DN-1	0	0	0	0	0	0	0	0	0	0	0	0	0	0	0	0	0.01	0	0	0	0	0	0	0	0	0	0	0	0	0	0.01	0	0	0	0	0	0	0	0	0	0	0	0.002	0.004	0.001	0.001	0.003	0.001	0.004
Pseudoalteromonas aliena	0	0	0	0	0	0	0	0	0.01	0	0	0	0	0	0	0	0	0	0	0	0	0	0	0	0	0	0	0	0	0	0	0	0	0	0	0	0.01	0	0	0	0	0	0.001	0.005	0.001	1e-05	1e-05	0.001	0.003
Colwellia psychrerythraea	0	0	0	0	0	0	0	0	0.01	0	0	0	0	0	0	0	0	0	0	0	0	0	0	0	0	0	0	0	0	0	0	0	0	0	0	0	0.01	0	0	0	0	0	0.001	0.007	0.001	0.003	0.003	1e-05	0.006
Vibrio nigripulchritudo	0	0	0.01	0	0	0	0	0	0	0	0	0	0	0	0	0	0	0.01	0	0	0	0	0	0	0	0	0	0	0	0	0	0	0	0	0	0	0	0	0	0	0	0	0.002	0.004	0.001	0.002	0.002	0.001	0.004
Vibrio tubiashii	0	0	0	0	0	0	0	0	0	0	0	0	0	0	0	0	0	0	0	0	0	0	0.01	0	0	0	0	0	0	0	0	0	0	0	0	0	0.01	0	0	0	0	0	0.003	0.001	0.001	0.001	0.003	0.001	0.001
Stenotrophomonas sp. YAU14A_MKIMI4_1	0	0	0.01	0	0	0	0	0	0	0.01	0	0	0	0	0	0	0	0	0	0	0	0	0	0	0	0	0	0	0	0	0	0	0	0	0	0	0	0	0	0	0	0	1e-05	1e-05	1e-05	1e-05	0.001	0.001	1e-05
Stenotrophomonas acidaminiphila	0	0	0	0	0	0	0	0	0	0	0	0	0	0	0	0	0	0	0	0	0	0	0	0	0	0	0	0	0	0	0	0.02	0	0	0	0	0	0	0	0	0	0	0.002	0.003	0.001	0.001	0.004	0.001	0.004
Xanthomonas hortorum	0	0	0	0	0	0	0	0.01	0	0	0	0	0	0	0.01	0	0	0	0	0	0	0	0	0	0	0	0	0	0	0	0	0	0	0	0	0	0	0	0	0	0	0	0.001	0.001	1e-05	1e-05	1e-05	1e-05	0.001
Halomonas elongata	0	0	0	0	0	0	0	0	0	0	0	0	0	0	0	0	0	0	0	0	0	0	0.01	0	0	0	0	0	0	0	0	0	0	0	0	0	0.01	0	0	0	0	0	0.002	0.005	0.002	0.001	0.001	0.001	0.007
Alcanivorax borkumensis	0	0	0.01	0	0	0	0	0	0	0	0	0	0	0	0	0	0.01	0	0	0	0	0	0	0	0	0	0	0	0	0	0	0	0	0	0	0	0	0	0	0	0	0	1e-05	1e-05	1e-05	1e-05	1e-05	1e-05	1e-05
Reinekea forsetii	0	0	0	0	0	0	0	0	0	0.01	0	0	0	0	0	0	0	0	0	0	0	0	0	0	0	0	0	0	0	0	0.01	0	0	0	0	0	0	0	0	0	0	0	0.001	0.002	0.002	0.001	0.003	1e-05	0.002
Nitrosococcus wardiae	0	0	0	0	0	0	0	0	0	0.01	0	0	0	0	0	0	0	0	0	0	0	0	0	0	0	0	0	0	0	0	0.01	0	0	0	0	0	0	0	0	0	0	0	0.001	0.006	0.001	0.001	1e-05	0.001	0.007
Aeromonas veronii	0	0	0	0	0	0	0	0	0	0	0	0	0	0	0	0	0.01	0	0	0	0	0	0	0	0	0	0	0	0	0	0	0	0	0	0	0	0	0.01	0	0	0	0	0.005	0.009	0.003	0.002	0.004	0.003	0.01
Methylomicrobium album	0	0	0	0	0	0	0	0	0	0	0	0	0	0	0	0	0	0	0	0	0	0	0.01	0	0	0	0	0	0	0	0	0	0	0	0	0	0.01	0	0	0	0	0	0.004	0.002	0.002	0.003	0.002	0.001	0.003
Desulfomicrobium orale	0	0	0	0	0	0	0	0	0	0	0	0	0	0	0	0	0	0	0	0	0	0	0	0	0	0	0	0	0.01	0	0	0	0	0	0	0	0	0	0	0	0.01	0	0.005	0.01	0.001	0.002	0.004	0.001	0.011
Myxococcus fulvus	0	0	0	0	0	0	0	0	0	0	0	0	0	0	0	0	0	0	0	0	0	0	0	0	0	0	0	0	0	0	0.01	0	0	0	0	0	0	0.01	0	0	0	0	0.004	0.007	0.002	0.002	0.002	0.001	0.008
Geoalkalibacter subterraneus	0	0	0	0	0	0	0.01	0	0	0	0	0	0	0	0	0	0	0.01	0	0	0	0	0	0	0	0	0	0	0	0	0	0	0	0	0	0	0	0	0	0	0	0	0.005	0.008	0.003	0.002	0.003	0.002	0.01
Desulfuromonas soudanensis	0	0	0.01	0	0	0	0	0	0	0.01	0	0	0	0	0	0	0	0	0	0	0	0	0	0	0	0	0	0	0	0	0	0	0	0	0	0	0	0	0	0	0	0	0.003	0.003	0.002	0.002	0.006	0.001	0.004
Desulfobacula toluolica	0	0	0	0	0	0	0	0	0	0	0	0	0	0	0	0	0	0.01	0	0	0	0	0	0	0	0	0	0.01	0	0	0	0	0	0	0	0	0	0	0	0	0	0	0.002	0.003	0.004	0.003	0.004	0.001	0.003
Desulfatibacillum aliphaticivorans	0	0	0	0	0	0	0	0	0	0	0	0	0	0	0	0	0	0	0	0	0	0	0	0	0	0	0	0	0	0	0.01	0	0	0	0	0	0.01	0	0	0	0	0	0.003	0.006	0.002	0.001	0.002	0.002	0.006
Desulfobulbus oralis	0	0	0	0	0	0	0	0	0	0.01	0	0	0	0	0	0	0	0	0	0	0	0	0	0	0	0	0	0	0	0	0.01	0	0	0	0	0	0	0	0	0	0	0	0.005	0.006	0.002	0.004	0.002	0.002	0.007
Campylobacter pinnipediorum	0	0	0	0	0	0	0	0	0	0	0	0	0	0	0	0	0	0.01	0	0	0	0	0	0	0	0	0	0	0	0	0	0	0	0	0	0	0	0	0.01	0	0	0	0.001	0.006	0.005	0.002	0.002	0.001	0.005
Campylobacter showae	0	0	0	0	0	0	0	0	0	0	0	0	0	0	0	0	0	0	0	0	0	0	0.01	0	0	0	0	0	0	0	0	0	0	0	0	0	0.01	0	0	0	0	0	0.001	0.004	0.001	0.001	1e-05	0.001	0.005
Sulfurospirillum multivorans	0	0	0.01	0	0	0	0	0	0	0.01	0	0	0	0	0	0	0	0	0	0	0	0	0	0	0	0	0	0	0	0	0	0	0	0	0	0	0	0	0	0	0	0	0.001	0.001	1e-05	0.001	0.001	1e-05	0.001
Agrobacterium sp. RAC06	0	0	0	0	0	0	0	0	0	0	0	0	0	0	0	0	0	0	0	0	0	0	0.01	0	0	0	0	0	0	0	0	0	0	0	0	0	0.01	0	0	0	0	0	0.004	0.007	0.001	0.002	0.001	0.001	0.008
Bradyrhizobium sp. SK17	0	0	0	0	0	0	0	0	0	0	0	0	0	0	0	0	0	0	0	0	0	0	0	0	0	0	0	0	0	0	0.01	0.01	0	0	0	0	0	0	0	0	0	0	0.002	0.006	1e-05	0.001	0.003	1e-05	0.006
Aminobacter sp. MSH1	0	0	0.01	0	0	0	0	0	0	0.01	0	0	0	0	0	0	0	0	0	0	0	0	0	0	0	0	0	0	0	0	0	0	0	0	0	0	0	0	0	0	0	0	0.001	0.004	0.001	0.001	0.001	1e-05	0.004
Devosia sp. 1566	0	0	0	0	0	0	0	0	0	0.01	0	0	0	0	0	0	0	0	0	0	0	0	0	0	0	0	0	0	0	0	0.01	0	0	0	0	0	0	0	0	0	0	0	0.001	0.009	0.001	0.002	0.001	0.001	0.01
Pseudorhodoplanes sinuspersici	0	0	0.01	0	0	0	0	0	0	0.01	0	0	0	0	0	0	0	0	0	0	0	0	0	0	0	0	0	0	0	0	0	0	0	0	0	0	0	0	0	0	0	0	0.003	0.002	0.002	0.001	0.001	0.001	0.003
Labrenzia sp. CP4	0	0	0.01	0	0	0	0	0	0	0.01	0	0	0	0	0	0	0	0	0	0	0	0	0	0	0	0	0	0	0	0	0	0	0	0	0	0	0	0	0	0	0	0	0.002	0.001	0.001	1e-05	1e-05	1e-05	0.001
Thalassococcus sp. SH-1	0	0	0	0	0	0	0	0	0	0.01	0	0	0	0	0	0	0	0	0	0	0	0	0	0	0	0	0	0	0	0	0.01	0	0	0	0	0	0	0	0	0	0	0	0.002	0.006	0.002	0.001	1e-05	1e-05	0.006
Yoonia vestfoldensis	0	0	0	0	0	0	0	0	0	0	0	0	0	0	0	0	0	0	0	0	0	0	0.01	0	0	0	0	0	0	0	0	0	0	0	0	0	0.01	0	0	0	0	0	0.001	0.001	1e-05	0.001	0.001	1e-05	0.002
Thalassospira xiamenensis	0	0	0	0	0	0	0	0	0	0	0	0	0	0	0	0	0	0	0	0	0	0	0	0	0	0	0	0	0	0	0.01	0	0	0	0	0	0.01	0	0	0	0	0	0.002	0.006	0.002	0.001	0.001	0.001	0.006
Sphingobium baderi	0	0	0.01	0	0	0	0	0	0	0.01	0	0	0	0	0	0	0	0	0	0	0	0	0	0	0	0	0	0	0	0	0	0	0	0	0	0	0	0	0	0	0	0	0.003	0.002	0.001	0.001	0.001	0.001	0.002
Novosphingobium sp. THN1	0	0	0	0	0	0	0	0	0	0	0	0	0	0	0	0	0	0	0	0	0	0	0.01	0	0	0	0	0	0	0	0	0	0	0	0	0	0.01	0	0	0	0	0	0.001	0.005	1e-05	1e-05	1e-05	1e-05	0.005
Altererythrobacter epoxidivorans	0	0	0	0	0	0	0	0	0	0	0	0	0	0	0	0	0	0	0	0	0	0	0.01	0	0	0	0	0	0	0	0	0	0	0	0	0	0.01	0	0	0	0	0	0.001	0.001	1e-05	1e-05	1e-05	1e-05	0.001
Micavibrio aeruginosavorus	0	0	0	0	0	0	0	0	0	0	0	0	0	0	0	0	0	0	0	0	0	0	0.01	0	0	0	0	0	0	0	0	0	0	0	0	0	0.01	0	0	0	0	0	0.003	0.005	0.001	0.001	0.001	0.001	0.005
Burkholderia glumae	0	0	0.01	0	0	0	0	0	0	0.01	0	0	0	0	0	0	0	0	0	0	0	0	0	0	0	0	0	0	0	0	0	0	0	0	0	0	0	0	0	0	0	0	0.002	0.002	0.001	0.001	0.001	0.001	0.003
Cupriavidus necator	0	0	0	0	0	0	0	0.01	0	0	0	0	0	0	0	0	0	0.01	0	0	0	0	0	0	0	0	0	0	0	0	0	0	0	0	0	0	0	0	0	0	0	0	0.005	0.007	0.004	0.004	0.003	0.001	0.008
Cupriavidus basilensis	0	0	0	0	0	0	0	0	0	0	0	0	0	0	0	0	0	0	0	0	0	0	0.01	0	0	0	0	0	0	0	0	0	0	0	0	0	0.01	0	0	0	0	0	0.002	0.004	0.002	0.002	0.002	0.001	0.005
Paraburkholderia aromaticivorans	0	0	0	0	0	0	0	0	0	0	0	0	0	0	0	0	0.01	0	0	0	0	0	0	0	0	0	0	0	0	0	0.01	0	0	0	0	0	0	0	0	0	0	0	0.002	0.002	0.002	0.001	0.001	1e-05	0.003
Paraburkholderia terrae	0	0	0.01	0	0	0	0	0	0	0	0	0	0	0	0	0	0.01	0	0	0	0	0	0	0	0	0	0	0	0	0	0	0	0	0	0	0	0	0	0	0	0	0	0.003	0.003	0.002	0.001	0.001	0.001	0.002
Paraburkholderia graminis	0	0	0	0	0	0	0	0	0.01	0	0	0	0	0	0	0	0	0	0	0	0	0	0.01	0	0	0	0	0	0	0	0	0	0	0	0	0	0	0	0	0	0	0	0.001	1e-05	0.001	1e-05	1e-05	1e-05	0.001
Polynucleobacter paneuropaeus	0	0	0	0	0	0	0	0	0.01	0	0	0	0	0	0	0	0	0	0	0	0	0	0.01	0	0	0	0	0	0	0	0	0	0	0	0	0	0	0	0	0	0	0	1e-05	1e-05	1e-05	1e-05	0.001	1e-05	1e-05
Acidovorax sp. JS42	0	0	0	0	0	0	0	0.01	0	0	0	0	0	0	0	0	0	0	0	0	0	0	0.01	0	0	0	0	0	0	0	0	0	0	0	0	0	0	0	0	0	0	0	0.001	0.001	1e-05	1e-05	0.001	1e-05	0.001
Hydrogenophaga sp. PBC	0	0	0.01	0	0	0	0	0	0	0.01	0	0	0	0	0	0	0	0	0	0	0	0	0	0	0	0	0	0	0	0	0	0	0	0	0	0	0	0	0	0	0	0	0.002	0.006	0.001	0.003	0.004	0.001	0.006
Comamonas thiooxydans	0	0	0	0	0	0	0	0	0.01	0	0	0	0	0	0	0	0	0	0	0	0	0	0.01	0	0	0	0	0	0	0	0	0	0	0	0	0	0	0	0	0	0	0	1e-05	0.003	1e-05	0.001	1e-05	1e-05	0.002
Delftia tsuruhatensis	0	0	0	0	0	0	0	0	0	0	0	0	0	0	0	0	0	0.01	0	0	0	0	0.01	0	0	0	0	0	0	0	0	0	0	0	0	0	0	0	0	0	0	0	0.001	0.001	0.001	0.001	0.001	1e-05	0.002
Ramlibacter tataouinensis	0	0	0.01	0	0	0	0	0	0	0.01	0	0	0	0	0	0	0	0	0	0	0	0	0	0	0	0	0	0	0	0	0	0	0	0	0	0	0	0	0	0	0	0	0.005	0.008	0.003	0.006	0.004	0.002	0.01
Limnohabitans sp. 63ED37-2	0	0	0	0	0	0	0	0	0	0.01	0	0	0	0	0	0	0	0	0	0	0	0	0	0	0	0	0	0	0	0	0.01	0	0	0	0	0	0	0	0	0	0	0	0.002	0.004	1e-05	0.001	0.001	1e-05	0.005
Bordetella parapertussis	0	0	0	0	0	0	0	0	0.01	0	0	0	0	0	0	0	0	0	0	0	0	0	0.01	0	0	0	0	0	0	0	0	0	0	0	0	0	0	0	0	0	0	0	1e-05	1e-05	1e-05	1e-05	1e-05	1e-05	1e-05
Achromobacter denitrificans	0	0	0.01	0	0	0	0	0	0	0.01	0	0	0	0	0	0	0	0	0	0	0	0	0	0	0	0	0	0	0	0	0	0	0	0	0	0	0	0	0	0	0	0	0.004	0.004	0.002	0.002	0.002	0.002	0.005
Taylorella equigenitalis	0	0	0	0	0	0	0	0	0	0	0	0	0	0	0	0	0	0	0	0	0	0	0.01	0	0	0	0	0	0	0	0	0	0	0	0	0	0.01	0	0	0	0	0	0.001	0.002	0.002	0.002	0.001	0.001	0.002
Collimonas fungivorans	0	0	0	0	0	0	0	0	0	0.01	0	0	0	0	0	0	0	0	0	0	0	0	0	0	0	0	0	0	0	0	0.01	0	0	0	0	0	0	0	0	0	0	0	0.003	0.006	0.003	0.002	0.002	0.002	0.006
Thiomonas arsenitoxydans	0	0	0	0	0	0	0	0	0	0	0	0	0	0	0	0	0	0	0	0	0	0	0.01	0	0	0	0	0	0	0	0	0	0	0	0	0	0.01	0	0	0	0	0	0.001	0.005	1e-05	0.001	1e-05	1e-05	0.006
Methylibium sp. Pch-M	0	0	0	0	0	0	0	0	0	0.01	0	0	0	0	0	0	0	0	0	0	0	0	0	0	0	0	0	0	0	0	0.01	0	0	0	0	0	0	0	0	0	0	0	0.001	0.006	0.001	0.001	1e-05	1e-05	0.007
Leptothrix cholodnii	0	0	0.01	0	0	0	0	0	0	0.01	0	0	0	0	0	0	0	0	0	0	0	0	0	0	0	0	0	0	0	0	0	0	0	0	0	0	0	0	0	0	0	0	0.004	0.004	0.002	0.003	0.002	0.003	0.006
Azospira oryzae	0	0	0.01	0	0	0	0	0	0	0.01	0	0	0	0	0	0	0	0	0	0	0	0	0	0	0	0	0	0	0	0	0	0	0	0	0	0	0	0	0	0	0	0	0.002	0.003	0.002	0.002	0.001	0.002	0.004
Candidatus Accumulibacter phosphatis	0	0	0	0	0	0	0	0	0	0	0	0	0	0	0	0	0	0	0	0	0	0	0.01	0	0	0	0	0	0	0	0	0	0	0	0	0	0.01	0	0	0	0	0	0.002	0.004	0.002	0.002	0.001	0.001	0.005
Halobacteriovorax marinus	0	0	0	0	0	0	0	0	0	0	0	0	0	0	0	0	0	0.01	0	0	0	0	0	0	0	0	0	0	0	0	0	0	0	0	0	0	0.01	0	0	0	0	0	0.003	0.003	0.002	0.001	0.004	0.001	0.002
Ereboglobus luteus	0	0	0.01	0	0	0	0	0	0	0.01	0	0	0	0	0	0	0	0	0	0	0	0	0	0	0	0	0	0	0	0	0	0	0	0	0	0	0	0	0	0	0	0	0.005	0.003	0.001	0.002	0.001	0.001	0.004
Fusobacterium gonidiaformans	0	0	0	0	0	0	0	0	0	0	0	0	0	0.01	0	0	0	0	0	0	0	0	0	0	0	0	0	0.01	0	0	0	0	0	0	0	0	0	0	0	0	0	0	0.004	0.004	0.005	0.003	0.007	0.003	0.004
Persephonella marina	0	0	0	0	0.01	0	0	0	0	0	0	0	0	0	0	0	0	0	0	0	0	0	0	0	0	0.01	0	0	0	0	0	0	0	0	0	0	0	0	0	0	0	0	0.001	1e-05	0.001	1e-05	0.004	1e-05	0.001
Caldisericum exile	0	0	0	0	0	0	0	0	0	0	0	0	0	0	0	0	0	0	0	0	0	0	0.01	0	0	0	0	0	0	0	0	0	0	0	0	0	0.01	0	0	0	0	0	0.001	0.002	0.001	1e-05	0.002	0.001	0.002
Streptococcus sp. FDAARGOS_522	0	0.01	0	0	0	0	0	0	0	0	0	0	0	0	0	0.01	0	0	0	0	0	0	0	0	0	0	0	0	0	0	0	0	0	0	0	0	0	0	0	0	0	0	1e-05	1e-05	1e-05	1e-05	1e-05	1e-05	1e-05
Klebsiella quasivariicola	0	0	0	0	0	0	0	0	0	0	0	0	0	0	0	0.01	0	0	0	0	0	0	0	0	0	0	0	0.01	0	0	0	0	0	0	0	0	0	0	0	0	0	0	0.001	1e-05	1e-05	1e-05	0.009	0.016	1e-05
Serratia sp. FS14	0	0	0.01	0	0	0	0	0	0	0.01	0	0	0	0	0	0	0	0	0	0	0	0	0	0	0	0	0	0	0	0	0	0	0	0	0	0	0	0	0	0	0	0	1e-05	1e-05	1e-05	1e-05	1e-05	1e-05	1e-05
Citrobacter sp. TBCP-5362	0	0	0	0	0	0	0	0	0	0	0	0	0	0.01	0	0.01	0	0	0	0	0	0	0	0	0	0	0	0	0	0	0	0	0	0	0	0	0	0	0	0	0	0	1e-05	1e-05	1e-05	1e-05	1e-05	1e-05	1e-05
Acetobacter pomorum	0	0	0	0	0	0	0	0	0.01	0	0	0	0	0	0	0	0	0	0	0	0	0	0.01	0	0	0	0	0	0	0	0	0	0	0	0	0	0	0	0	0	0	0	1e-05	1e-05	1e-05	1e-05	1e-05	1e-05	1e-05
Carnobacterium sp. CP1	0.01	0	0	0	0	0	0	0	0	0	0	0	0	0	0	0	0	0	0	0	0	0	0	0	0	0	0	0	0	0	0	0	0	0	0	0	0	0	0	0	0	0	0.002	0.003	0.005	0.003	0.004	0.002	0.003
Bacillus krulwichiae	0.01	0	0	0	0	0	0	0	0	0	0	0	0	0	0	0	0	0	0	0	0	0	0	0	0	0	0	0	0	0	0	0	0	0	0	0	0	0	0	0	0	0	0.003	0.004	0.003	0.002	0.004	0.001	0.003
Parageobacillus thermoglucosidasius	0.01	0	0	0	0	0	0	0	0	0	0	0	0	0	0	0	0	0	0	0	0	0	0	0	0	0	0	0	0	0	0	0	0	0	0	0	0	0	0	0	0	0	1e-05	1e-05	1e-05	1e-05	1e-05	1e-05	1e-05
Staphylococcus lugdunensis	0.01	0	0	0	0	0	0	0	0	0	0	0	0	0	0	0	0	0	0	0	0	0	0	0	0	0	0	0	0	0	0	0	0	0	0	0	0	0	0	0	0	0	0.002	0.003	0.003	0.001	0.004	0.001	0.003
Kurthia zopfii	0.01	0	0	0	0	0	0	0	0	0	0	0	0	0	0	0	0	0	0	0	0	0	0	0	0	0	0	0	0	0	0	0	0	0	0	0	0	0	0	0	0	0	0.002	0.006	0.004	0.001	0.002	0.003	0.004
Listeria seeligeri	0.01	0	0	0	0	0	0	0	0	0	0	0	0	0	0	0	0	0	0	0	0	0	0	0	0	0	0	0	0	0	0	0	0	0	0	0	0	0	0	0	0	0	0.002	0.003	0.005	0.002	0.001	0.003	0.002
Histophilus somni	0.01	0	0	0	0	0	0	0	0	0	0	0	0	0	0	0	0	0	0	0	0	0	0	0	0	0	0	0	0	0	0	0	0	0	0	0	0	0	0	0	0	0	0.002	0.003	0.005	0.001	0.006	0.002	0.002
Arcobacter skirrowii	0.01	0	0	0	0	0	0	0	0	0	0	0	0	0	0	0	0	0	0	0	0	0	0	0	0	0	0	0	0	0	0	0	0	0	0	0	0	0	0	0	0	0	0.002	0.009	0.002	0.001	0.001	0.002	0.007
Marinitoga piezophila	0.01	0	0	0	0	0	0	0	0	0	0	0	0	0	0	0	0	0	0	0	0	0	0	0	0	0	0	0	0	0	0	0	0	0	0	0	0	0	0	0	0	0	0.001	0.002	1e-05	1e-05	1e-05	0.001	0.001
Clostridium scatologenes	0	0	0	0	0	0	0	0	0	0	0	0	0	0	0	0	0	0	0	0	0	0	0	0	0	0	0	0.01	0	0	0	0	0	0	0	0	0	0	0	0	0	0	0.003	0.007	0.004	0.003	0.002	0.002	0.005
Candidatus Desulforudis audaxviator	0	0	0	0	0	0	0	0	0	0	0	0	0	0	0	0	0	0	0	0	0	0	0	0	0	0	0	0	0	0	0	0	0	0	0	0	0.01	0	0	0	0	0	0.003	0.004	0.001	0.001	0.001	0.001	0.004
Thermoanaerobacterium xylanolyticum	0	0	0	0	0	0	0	0	0	0	0	0	0	0	0	0	0	0.01	0	0	0	0	0	0	0	0	0	0	0	0	0	0	0	0	0	0	0	0	0	0	0	0	0.003	0.007	0.003	0.001	0.004	0.002	0.005
Caldicellulosiruptor hydrothermalis	0	0	0	0	0	0	0	0	0	0	0	0	0	0	0	0	0	0.01	0	0	0	0	0	0	0	0	0	0	0	0	0	0	0	0	0	0	0	0	0	0	0	0	0.001	0.003	0.001	1e-05	0.002	0.001	0.002
Caldicellulosiruptor owensensis	0	0	0	0	0	0	0	0	0	0	0	0	0	0.01	0	0	0	0	0	0	0	0	0	0	0	0	0	0	0	0	0	0	0	0	0	0	0	0	0	0	0	0	0.002	0.003	0.002	0.003	0.002	0.001	0.003
Caldicellulosiruptor obsidiansis	0	0	0	0	0	0	0	0	0	0	0	0	0	0	0	0	0	0	0	0.01	0	0	0	0	0	0	0	0	0	0	0	0	0	0	0	0	0	0	0	0	0	0	0.002	0.003	0.001	1e-05	0.002	0.001	0.002
Caldicellulosiruptor bescii	0	0	0	0	0	0	0	0	0	0	0	0	0	0	0	0	0	0.01	0	0	0	0	0	0	0	0	0	0	0	0	0	0	0	0	0	0	0	0	0	0	0	0	0.002	0.001	1e-05	1e-05	1e-05	1e-05	1e-05
Thermoanaerobacter italicus	0	0	0	0	0	0	0	0	0	0	0	0	0	0	0	0	0	0.01	0	0	0	0	0	0	0	0	0	0	0	0	0	0	0	0	0	0	0	0	0	0	0	0	1e-05	0.003	0.001	1e-05	1e-05	0.001	0.002
Thermacetogenium phaeum	0	0	0	0	0	0	0	0.01	0	0	0	0	0	0	0	0	0	0	0	0	0	0	0	0	0	0	0	0	0	0	0	0	0	0	0	0	0	0	0	0	0	0	0.002	0.006	0.002	0.002	0.001	0.001	0.005
Thermoanaerobacterales bacterium SK-G1	0	0	0	0	0	0	0	0	0	0	0	0	0	0	0	0	0	0	0	0	0	0	0	0	0	0	0	0	0	0	0	0	0	0	0	0	0	0	0.01	0	0	0	0.004	0.004	0.003	0.003	0.002	0.001	0.004
Negativicoccus massiliensis	0	0	0	0	0	0	0	0	0	0	0	0	0	0	0	0	0	0	0	0	0	0	0	0	0	0	0	0	0	0	0	0	0	0	0	0	0	0	0	0.01	0	0	0.002	0.009	0.004	0.002	0.002	0.001	0.009
Streptococcus parauberis	0	0.01	0	0	0	0	0	0	0	0	0	0	0	0	0	0	0	0	0	0	0	0	0	0	0	0	0	0	0	0	0	0	0	0	0	0	0	0	0	0	0	0	0.003	0.002	0.004	0.002	0.002	0.002	0.002
Streptococcus sp. oral taxon 064	0	0	0	0	0	0	0	0	0	0	0	0	0	0	0	0.01	0	0	0	0	0	0	0	0	0	0	0	0	0	0	0	0	0	0	0	0	0	0	0	0	0	0	1e-05	1e-05	0.002	0.001	1e-05	0.001	1e-05
Streptococcus pluranimalium	0	0	0	0	0	0	0	0	0	0	0	0	0	0	0	0	0	0	0	0	0	0	0	0	0	0	0	0	0	0	0	0	0	0	0	0	0	0	0	0.01	0	0	0.001	0.005	0.004	0.002	0.004	0.004	0.005
Streptococcus sp. KCOM 2412	0	0.01	0	0	0	0	0	0	0	0	0	0	0	0	0	0	0	0	0	0	0	0	0	0	0	0	0	0	0	0	0	0	0	0	0	0	0	0	0	0	0	0	1e-05	1e-05	0.003	0.001	1e-05	0.001	1e-05
Streptococcus sp. NCTC 10228	0	0.01	0	0	0	0	0	0	0	0	0	0	0	0	0	0	0	0	0	0	0	0	0	0	0	0	0	0	0	0	0	0	0	0	0	0	0	0	0	0	0	0	1e-05	1e-05	0.001	0.001	1e-05	1e-05	1e-05
Lactobacillus brevis	0	0	0	0	0	0	0	0	0	0	0	0	0	0	0	0	0	0	0	0	0	0	0	0	0	0	0	0	0	0	0	0	0	0	0	0	0	0	0	0.01	0	0	0.002	0.003	0.002	0.002	0.004	0.001	0.003
Lactobacillus sp. BHWM-4	0	0	0	0	0	0	0	0	0	0	0	0	0	0	0	0	0	0.01	0	0	0	0	0	0	0	0	0	0	0	0	0	0	0	0	0	0	0	0	0	0	0	0	0.002	0.002	0.001	1e-05	0.002	1e-05	0.001
Lactobacillus agilis	0	0	0	0	0	0	0	0	0	0	0	0	0	0	0	0	0	0.01	0	0	0	0	0	0	0	0	0	0	0	0	0	0	0	0	0	0	0	0	0	0	0	0	0.001	0.001	0.002	0.001	0.002	1e-05	0.001
Lactobacillus fuchuensis	0	0	0	0	0	0	0	0	0	0	0	0	0	0	0	0	0	0	0	0	0	0	0	0	0	0	0	0	0	0	0	0	0	0	0	0	0.01	0	0	0	0	0	0.002	0.004	0.002	0.001	0.001	1e-05	0.004
Lactobacillus bombi	0	0	0	0	0	0	0	0	0	0	0	0	0	0	0	0	0	0	0	0	0	0	0	0	0	0	0	0	0	0	0	0	0	0	0	0	0	0	0.01	0	0	0	0.002	0.003	0.003	0.001	0.001	0.003	0.002
Lactobacillus apis	0	0	0	0	0	0	0	0	0	0	0	0	0	0	0	0	0	0	0	0	0	0	0	0	0	0	0	0	0	0	0	0	0	0	0	0	0.01	0	0	0	0	0	0.001	0.001	0.001	0.001	1e-05	1e-05	0.001
Lactobacillus mucosae	0	0	0	0	0	0	0	0	0	0	0	0	0	0	0	0	0	0	0	0	0	0	0	0	0	0	0	0	0	0	0.01	0	0	0	0	0	0	0	0	0	0	0	0.001	0.003	0.016	0.001	0.002	0.002	0.002
Lactobacillus acidipiscis	0	0	0	0	0	0	0	0	0	0	0	0	0	0	0	0	0	0.01	0	0	0	0	0	0	0	0	0	0	0	0	0	0	0	0	0	0	0	0	0	0	0	0	0.003	0.003	0.001	0.001	0.001	0.001	0.002
Enterococcus thailandicus	0	0	0	0	0	0	0.01	0	0	0	0	0	0	0	0	0	0	0	0	0	0	0	0	0	0	0	0	0	0	0	0	0	0	0	0	0	0	0	0	0	0	0	0.005	0.003	0.004	0.001	0.001	0.001	0.002
Enterococcus sp. M190262	0	0	0	0	0	0	0	0	0	0	0	0	0	0	0	0	0	0	0	0	0	0	0	0	0	0	0	0	0	0.01	0	0	0	0	0	0	0	0	0	0	0	0	1e-05	0.001	0.001	1e-05	0.001	1e-05	0.001
Vagococcus teuberi	0	0	0	0	0	0	0.01	0	0	0	0	0	0	0	0	0	0	0	0	0	0	0	0	0	0	0	0	0	0	0	0	0	0	0	0	0	0	0	0	0	0	0	0.004	0.004	0.003	0.002	0.001	0.001	0.004
Leuconostoc mesenteroides	0	0	0	0	0	0	0	0	0	0	0	0	0	0	0	0	0	0	0	0	0	0	0	0	0	0	0	0	0.01	0	0	0	0	0	0	0	0	0	0	0	0	0	0.001	0.002	0.006	0.001	0.003	0.002	0.003
Leuconostoc gelidum	0	0	0	0	0	0	0	0	0	0	0	0	0	0	0	0	0	0	0	0	0	0	0	0	0	0	0	0	0	0	0	0	0	0	0	0	0.01	0	0	0	0	0	0.002	0.003	0.002	0.001	0.001	0.002	0.002
Leuconostoc kimchii	0	0	0	0	0	0	0	0	0	0	0	0	0	0	0	0	0	0	0	0	0	0.01	0	0	0	0	0	0	0	0	0	0	0	0	0	0	0	0	0	0	0	0	0.001	0.002	0.001	1e-05	0.001	1e-05	0.002
Carnobacterium inhibens	0	0	0	0	0	0	0	0	0	0	0	0	0	0	0	0	0	0	0	0	0	0	0	0	0	0	0	0	0	0.01	0	0	0	0	0	0	0	0	0	0	0	0	0.003	0.003	0.001	0.002	0.001	0.001	0.002
Jeotgalibaca sp. PTS2502	0	0	0	0	0	0	0	0	0	0	0	0	0	0	0	0	0	0	0	0	0	0	0	0	0	0	0	0	0	0.01	0	0	0	0	0	0	0	0	0	0	0	0	0.002	0.002	0.003	0.002	0.002	0.001	0.002
Aerococcus urinaehominis	0	0	0	0	0	0	0	0	0	0.01	0	0	0	0	0	0	0	0	0	0	0	0	0	0	0	0	0	0	0	0	0	0	0	0	0	0	0	0	0	0	0	0	0.008	0.001	0.003	0.001	0.002	0.005	0.001
Bacillus horikoshii	0	0	0	0	0	0	0	0	0	0	0	0	0	0	0	0	0	0	0	0	0	0	0	0	0	0	0	0	0	0	0	0	0	0	0	0	0	0	0.01	0	0	0	0.003	0.009	0.006	0.002	0.002	0.003	0.008
Bacillus jeotgali	0	0	0	0	0	0	0	0	0	0	0	0	0	0	0	0	0	0	0	0	0	0	0	0	0	0	0	0	0	0	0	0	0	0	0	0	0	0	0	0.01	0	0	0.002	0.006	0.003	0.002	0.005	0.003	0.006
Bacillus halodurans	0	0	0	0	0	0	0	0	0	0	0	0	0	0	0	0	0	0.01	0	0	0	0	0	0	0	0	0	0	0	0	0	0	0	0	0	0	0	0	0	0	0	0	0.004	0.003	0.003	0.002	0.002	0.001	0.003
Bacillus methanolicus	0	0	0	0	0	0	0	0	0	0	0	0	0	0.01	0	0	0	0	0	0	0	0	0	0	0	0	0	0	0	0	0	0	0	0	0	0	0	0	0	0	0	0	0.002	0.003	0.004	0.002	0.002	0.004	0.002
Bacillus sp. Y1	0	0	0	0	0	0	0	0	0	0	0	0	0	0	0	0	0	0	0	0	0	0	0	0	0	0	0	0	0	0	0	0	0	0	0	0	0	0	0.01	0	0	0	0.003	0.005	0.006	0.004	0.002	0.003	0.004
Bacillus simplex	0	0	0	0	0	0	0	0	0	0	0	0	0	0	0	0	0	0.01	0	0	0	0	0	0	0	0	0	0	0	0	0	0	0	0	0	0	0	0	0	0	0	0	0.003	0.003	0.004	0.003	0.002	0.002	0.003
Bacillus cellulosilyticus	0	0	0	0	0	0	0	0	0	0	0	0	0	0	0	0	0	0.01	0	0	0	0	0	0	0	0	0	0	0	0	0	0	0	0	0	0	0	0	0	0	0	0	0.003	0.004	0.003	0.002	0.002	0.001	0.003
Bacillus flexus	0	0	0	0	0	0	0	0	0	0	0	0	0	0	0	0	0	0.01	0	0	0	0	0	0	0	0	0	0	0	0	0	0	0	0	0	0	0	0	0	0	0	0	0.004	0.004	0.003	0.001	0.004	0.002	0.004
Bacillus sp. Pc3	0	0	0	0	0	0	0	0	0	0	0	0	0	0	0	0	0	0	0	0	0	0.01	0	0	0	0	0	0	0	0	0	0	0	0	0	0	0	0	0	0	0	0	1e-05	1e-05	1e-05	1e-05	1e-05	1e-05	1e-05
Bacillus sp. MD-5	0	0	0	0	0	0	0	0	0	0	0	0	0	0	0	0	0	0.01	0	0	0	0	0	0	0	0	0	0	0	0	0	0	0	0	0	0	0	0	0	0	0	0	1e-05	1e-05	1e-05	1e-05	1e-05	1e-05	0.001
Geobacillus subterraneus	0	0	0	0	0	0	0	0	0	0	0	0	0	0	0	0	0	0.01	0	0	0	0	0	0	0	0	0	0	0	0	0	0	0	0	0	0	0	0	0	0	0	0	0.003	0.002	0.003	1e-05	0.004	0.001	0.003
Halobacillus litoralis	0	0	0	0	0	0	0	0	0	0	0	0	0	0	0	0	0	0.01	0	0	0	0	0	0	0	0	0	0	0	0	0	0	0	0	0	0	0	0	0	0	0	0	0.002	0.004	0.001	0.001	0.003	0.001	0.004
Halobacillus halophilus	0	0	0	0	0	0	0	0	0	0	0	0	0	0	0	0	0	0.01	0	0	0	0	0	0	0	0	0	0	0	0	0	0	0	0	0	0	0	0	0	0	0	0	0.002	0.006	0.003	0.002	0.004	0.001	0.005
Amphibacillus xylanus	0	0	0	0.01	0	0	0	0	0	0	0	0	0	0	0	0	0	0	0	0	0	0	0	0	0	0	0	0	0	0	0	0	0	0	0	0	0	0	0	0	0	0	0.004	0.004	0.004	0.002	0.003	0.001	0.003
Paenibacillus kribbensis	0	0	0	0	0	0	0	0	0	0	0	0	0	0	0	0	0	0.01	0	0	0	0	0	0	0	0	0	0	0	0	0	0	0	0	0	0	0	0	0	0	0	0	0.002	0.005	0.003	0.002	0.005	0.002	0.005
Paenibacillus sp. lzh-N1	0	0	0	0	0	0	0	0	0	0	0	0	0	0	0	0	0	0	0	0	0	0.01	0	0	0	0	0	0	0	0	0	0	0	0	0	0	0	0	0	0	0	0	1e-05	0.002	1e-05	1e-05	1e-05	1e-05	0.002
Paenibacillus peoriae	0	0	0	0	0	0	0	0	0	0	0	0	0	0	0	0	0	0	0.01	0	0	0	0	0	0	0	0	0	0	0	0	0	0	0	0	0	0	0	0	0	0	0	1e-05	0.001	1e-05	1e-05	1e-05	1e-05	1e-05
Cohnella sp. HS21	0	0	0	0	0	0	0	0	0	0	0	0	0	0.01	0	0	0	0	0	0	0	0	0	0	0	0	0	0	0	0	0	0	0	0	0	0	0	0	0	0	0	0	0.003	0.004	0.002	0.003	0.003	0.001	0.004
Aneurinibacillus sp. XH2	0	0	0	0	0	0	0	0	0	0	0	0	0	0	0	0	0	0.01	0	0	0	0	0	0	0	0	0	0	0	0	0	0	0	0	0	0	0	0	0	0	0	0	0.003	0.004	0.002	0.002	0.005	0.002	0.003
Staphylococcus caprae	0	0	0	0	0	0	0	0	0	0	0	0	0	0	0	0	0	0.01	0	0	0	0	0	0	0	0	0	0	0	0	0	0	0	0	0	0	0	0	0	0	0	0	0.001	0.006	0.003	0.001	0.001	0.002	0.004
Staphylococcus equorum	0	0	0	0	0	0	0	0	0	0	0	0	0	0.01	0	0	0	0	0	0	0	0	0	0	0	0	0	0	0	0	0	0	0	0	0	0	0	0	0	0	0	0	0.001	0.002	0.001	1e-05	1e-05	0.001	0.001
Staphylococcus warneri	0	0	0	0.01	0	0	0	0	0	0	0	0	0	0	0	0	0	0	0	0	0	0	0	0	0	0	0	0	0	0	0	0	0	0	0	0	0	0	0	0	0	0	1e-05	0.001	1e-05	1e-05	1e-05	1e-05	1e-05
Jeotgalicoccus saudimassiliensis	0	0	0	0	0	0	0	0	0	0	0	0	0	0	0	0	0	0.01	0	0	0	0	0	0	0	0	0	0	0	0	0	0	0	0	0	0	0	0	0	0	0	0	0.002	0.004	0.002	0.002	0.002	0.001	0.005
Planococcus halocryophilus	0	0	0	0	0	0	0	0	0	0	0	0	0	0	0	0	0	0.01	0	0	0	0	0	0	0	0	0	0	0	0	0	0	0	0	0	0	0	0	0	0	0	0	0.003	0.003	0.002	0.001	0.003	0.001	0.003
Brochothrix thermosphacta	0	0	0	0	0	0	0	0	0	0	0	0	0	0	0	0	0	0	0	0	0	0	0	0	0	0	0	0	0	0.01	0	0	0	0	0	0	0	0	0	0	0	0	0.001	0.003	0.004	0.002	0.002	0.001	0.003
Gemella sp. oral taxon 928	0	0	0	0	0	0	0	0	0	0	0	0	0	0	0	0	0	0.01	0	0	0	0	0	0	0	0	0	0	0	0	0	0	0	0	0	0	0	0	0	0	0	0	1e-05	1e-05	1e-05	1e-05	1e-05	1e-05	1e-05
Tumebacillus algifaecis	0	0	0	0	0	0	0	0	0	0	0	0	0	0	0	0	0	0	0	0	0	0	0	0	0	0	0	0	0	0	0	0	0	0	0	0	0	0	0.01	0	0	0	0.004	0.005	0.003	0.002	0.003	0.001	0.005
Ndongobacter massiliensis	0	0	0	0	0	0	0	0	0	0	0	0	0	0	0	0	0	0	0.01	0	0	0	0	0	0	0	0	0	0	0	0	0	0	0	0	0	0	0	0	0	0	0	0.008	0.008	0.002	0.002	0.003	0.002	0.009
Streptomyces dengpaensis	0	0	0	0	0	0	0	0	0	0	0	0	0	0	0	0	0	0	0	0	0	0	0	0	0	0	0	0	0	0	0.01	0	0	0	0	0	0	0	0	0	0	0	0.003	0.006	1e-05	0.001	0.001	0.001	0.007
Streptomyces leeuwenhoekii	0	0.01	0	0	0	0	0	0	0	0	0	0	0	0	0	0	0	0	0	0	0	0	0	0	0	0	0	0	0	0	0	0	0	0	0	0	0	0	0	0	0	0	0.001	0.001	1e-05	1e-05	1e-05	0.001	0.001
Streptomyces chartreusis	0	0	0	0	0	0	0	0	0	0	0	0	0	0	0	0	0	0	0	0	0	0	0	0	0	0	0	0	0	0	0	0	0	0	0	0	0	0	0	0.01	0	0	0.001	0.006	0.002	0.002	0.001	0.001	0.008
Streptomyces sp. PAMC 26508	0	0	0	0	0	0	0	0	0	0	0	0	0	0	0	0	0	0	0	0	0	0	0	0	0.01	0	0	0	0	0	0	0	0	0	0	0	0	0	0	0	0	0	1e-05	1e-05	1e-05	1e-05	1e-05	1e-05	0.001
Corynebacterium xerosis	0	0	0	0	0	0	0	0	0	0	0	0	0	0	0	0	0	0	0	0	0	0	0	0	0	0	0	0	0	0	0	0	0	0	0	0	0	0	0	0.01	0	0	0.001	0.001	1e-05	0.001	1e-05	1e-05	0.001
Corynebacterium maris	0	0	0	0	0	0	0	0	0	0	0	0	0	0	0	0	0	0	0	0.01	0	0	0	0	0	0	0	0	0	0	0	0	0	0	0	0	0	0	0	0	0	0	0.002	0.001	0.001	0.001	0.001	1e-05	0.001
Mycolicibacterium vanbaalenii	0	0	0.01	0	0	0	0	0	0	0	0	0	0	0	0	0	0	0	0	0	0	0	0	0	0	0	0	0	0	0	0	0	0	0	0	0	0	0	0	0	0	0	0.001	0.002	0.001	0.002	0.001	0.001	0.002
Mycobacteroides saopaulense	0	0	0	0	0	0	0	0	0	0	0	0	0	0	0	0	0	0	0	0	0	0	0	0	0	0	0	0	0	0	0	0	0	0	0	0	0.01	0	0	0	0	0	0.002	0.005	0.001	0.001	0.001	0.001	0.005
Rhodococcus pyridinivorans	0	0.01	0	0	0	0	0	0	0	0	0	0	0	0	0	0	0	0	0	0	0	0	0	0	0	0	0	0	0	0	0	0	0	0	0	0	0	0	0	0	0	0	1e-05	1e-05	1e-05	0.001	1e-05	1e-05	0.001
Dietzia psychralcaliphila	0	0	0	0	0	0	0	0	0	0	0	0	0	0	0	0	0	0.01	0	0	0	0	0	0	0	0	0	0	0	0	0	0	0	0	0	0	0	0	0	0	0	0	0.001	0.001	0.001	0.001	0.001	0.001	0.002
Microbacterium foliorum	0	0	0	0	0	0	0	0	0	0	0	0	0	0	0	0.01	0	0	0	0	0	0	0	0	0	0	0	0	0	0	0	0	0	0	0	0	0	0	0	0	0	0	0.003	0.003	0.003	0.002	0.002	0.001	0.004
Cryobacterium arcticum	0	0	0	0	0	0	0	0	0	0.01	0	0	0	0	0	0	0	0	0	0	0	0	0	0	0	0	0	0	0	0	0	0	0	0	0	0	0	0	0	0	0	0	0.001	0.005	1e-05	1e-05	0.001	1e-05	0.005
Neomicrococcus aestuarii	0	0	0	0	0	0	0	0	0	0	0	0	0	0	0.01	0	0	0	0	0	0	0	0	0	0	0	0	0	0	0	0	0	0	0	0	0	0	0	0	0	0	0	0.001	0.002	0.001	0.001	1e-05	1e-05	0.002
Brachybacterium sp. P6-10-X1	0	0	0	0	0	0	0	0	0	0	0	0	0	0	0	0	0	0	0	0.01	0	0	0	0	0	0	0	0	0	0	0	0	0	0	0	0	0	0	0	0	0	0	0.002	0.001	0.001	0.001	0.001	1e-05	0.002
Brachybacterium saurashtrense	0	0	0	0	0	0	0	0	0	0	0	0	0	0	0	0	0	0	0	0.01	0	0	0	0	0	0	0	0	0	0	0	0	0	0	0	0	0	0	0	0	0	0	0.002	0.002	0.001	0.001	0.001	0.001	0.003
Cellulosimicrobium cellulans	0	0	0	0	0	0	0	0	0	0.01	0	0	0	0	0	0	0	0	0	0	0	0	0	0	0	0	0	0	0	0	0	0	0	0	0	0	0	0	0	0	0	0	0.002	0.003	0.001	0.002	1e-05	0.001	0.004
Jonesia denitrificans	0	0	0	0	0	0	0	0	0	0	0	0	0	0	0	0	0	0	0	0	0	0	0	0	0	0	0	0	0	0	0.01	0	0	0	0	0	0	0	0	0	0	0	0.001	0.001	0.001	0.001	0.001	1e-05	0.002
Actinomyces sp. oral taxon 897	0	0	0	0	0	0	0	0	0	0	0	0	0	0	0	0	0	0	0	0	0	0	0	0	0	0	0	0	0	0	0	0	0	0	0.01	0	0	0	0	0	0	0	0.002	0.001	0.002	0.001	0.001	1e-05	0.002
Cutibacterium acnes	0	0	0	0	0	0	0	0	0	0	0	0	0	0	0	0	0	0	0	0	0	0	0	0	0	0	0	0	0	0	0	0.01	0	0	0	0	0	0	0	0	0	0	0.002	0.003	1e-05	0.001	0.003	1e-05	0.004
Auraticoccus monumenti	0	0	0	0	0	0	0	0	0	0	0	0	0	0	0	0	0	0	0	0	0	0	0	0	0	0	0	0	0	0	0.01	0	0	0	0	0	0	0	0	0	0	0	0.002	0.005	0.001	0.001	0.002	0.001	0.006
Actinoplanes missouriensis	0	0	0.01	0	0	0	0	0	0	0	0	0	0	0	0	0	0	0	0	0	0	0	0	0	0	0	0	0	0	0	0	0	0	0	0	0	0	0	0	0	0	0	0.003	0.005	0.002	0.002	0.002	0.002	0.005
Amycolatopsis albispora	0	0	0	0	0	0	0	0	0	0	0	0	0	0	0	0	0	0.01	0	0	0	0	0	0	0	0	0	0	0	0	0	0	0	0	0	0	0	0	0	0	0	0	0.004	0.005	0.003	0.002	0.002	0.003	0.005
Amycolatopsis sp. AA4	0	0	0	0	0	0	0	0	0	0	0	0	0	0	0	0	0	0	0	0	0	0	0	0	0	0	0	0	0	0	0.01	0	0	0	0	0	0	0	0	0	0	0	0.002	0.008	0.002	0.001	0.002	0.001	0.008
Saccharopolyspora erythraea	0	0	0	0	0	0	0	0	0	0.01	0	0	0	0	0	0	0	0	0	0	0	0	0	0	0	0	0	0	0	0	0	0	0	0	0	0	0	0	0	0	0	0	0.003	0.003	0.003	0.002	0.005	0.002	0.004
Nocardiopsis dassonvillei	0	0	0	0	0	0	0	0	0	0	0	0	0	0	0	0	0	0	0	0	0	0	0	0	0	0	0	0	0	0	0	0	0	0	0	0	0	0.01	0	0	0	0	0.004	0.004	0.003	0.002	0.002	0.002	0.005
Nonomuraea sp. ATCC 55076	0	0	0	0	0	0	0	0.01	0	0	0	0	0	0	0	0	0	0	0	0	0	0	0	0	0	0	0	0	0	0	0	0	0	0	0	0	0	0	0	0	0	0	0.006	0.007	0.001	0.003	0.002	0.002	0.009
Blastococcus saxobsidens	0	0	0	0	0	0	0	0	0	0	0	0	0	0	0	0	0	0.01	0	0	0	0	0	0	0	0	0	0	0	0	0	0	0	0	0	0	0	0	0	0	0	0	0.002	0.002	0.001	0.001	0.001	0.002	0.003
Jiangella alkaliphila	0	0.01	0	0	0	0	0	0	0	0	0	0	0	0	0	0	0	0	0	0	0	0	0	0	0	0	0	0	0	0	0	0	0	0	0	0	0	0	0	0	0	0	0.002	0.003	0.002	0.002	0.002	0.001	0.003
Nostoc carneum	0	0	0.01	0	0	0	0	0	0	0	0	0	0	0	0	0	0	0	0	0	0	0	0	0	0	0	0	0	0	0	0	0	0	0	0	0	0	0	0	0	0	0	0.001	0.001	0.001	0.001	0.001	0.001	0.001
Anabaena cylindrica	0	0	0	0	0	0	0	0	0	0.01	0	0	0	0	0	0	0	0	0	0	0	0	0	0	0	0	0	0	0	0	0	0	0	0	0	0	0	0	0	0	0	0	0.001	0.002	0.003	1e-05	0.003	0.001	0.002
Calothrix sp. NIES-2100	0	0	0	0	0	0	0	0	0	0	0	0	0	0	0	0	0	0.01	0	0	0	0	0	0	0	0	0	0	0	0	0	0	0	0	0	0	0	0	0	0	0	0	0.002	0.001	0.001	0.001	0.002	1e-05	1e-05
Dolichospermum compactum	0	0	0.01	0	0	0	0	0	0	0	0	0	0	0	0	0	0	0	0	0	0	0	0	0	0	0	0	0	0	0	0	0	0	0	0	0	0	0	0	0	0	0	0.001	0.003	0.001	1e-05	1e-05	1e-05	0.002
Fischerella sp. NIES-4106	0	0	0	0	0	0	0	0	0	0	0	0	0	0	0	0	0	0	0	0	0	0	0	0	0	0	0	0	0	0	0	0	0	0	0	0	0.01	0	0	0	0	0	0.003	0.003	0.002	0.001	0.001	1e-05	0.003
Geminocystis sp. NIES-3708	0	0	0	0	0	0	0	0	0	0	0	0	0	0	0	0	0	0	0	0	0	0	0	0	0	0	0	0	0	0	0.01	0	0	0	0	0	0	0	0	0	0	0	0.002	0.006	0.003	0.001	1e-05	0.001	0.005
Crocosphaera subtropica	0	0	0	0	0	0	0	0	0	0	0	0	0	0	0	0	0	0	0	0	0	0	0	0	0	0	0	0	0	0	0	0	0	0	0	0	0.01	0	0	0	0	0	0.001	0.002	0.003	0.001	0.002	0.001	0.002
Geitlerinema sp. PCC 7407	0	0	0	0	0	0	0	0	0	0.01	0	0	0	0	0	0	0	0	0	0	0	0	0	0	0	0	0	0	0	0	0	0	0	0	0	0	0	0	0	0	0	0	0.001	0.003	0.001	0.001	0.001	1e-05	0.003
Synechococcus sp. CC9311	0	0	0	0	0	0	0	0	0	0	0	0	0	0	0	0	0	0	0	0	0	0	0	0	0	0	0	0	0	0	0	0	0	0	0	0	0.01	0	0	0	0	0	1e-05	0.002	1e-05	1e-05	1e-05	1e-05	0.003
Prochlorococcus sp. MIT 0604	0	0	0	0	0	0	0	0	0	0	0	0	0	0	0	0	0	0	0	0	0	0	0	0	0	0	0	0	0	0	0	0	0	0	0	0	0.01	0	0	0	0	0	0.001	0.005	1e-05	1e-05	1e-05	1e-05	0.004
Leptolyngbya boryana	0	0	0	0	0	0	0	0	0	0	0	0	0	0	0	0	0	0	0	0	0	0	0	0	0	0	0	0	0	0	0.01	0	0	0	0	0	0	0	0	0	0	0	0.001	0.006	0.001	0.001	0.005	0.001	0.005
Mycoplasma edwardii	0	0	0	0	0	0	0	0	0	0	0	0	0	0	0	0	0	0	0	0	0	0	0	0	0	0	0	0	0	0	0	0	0	0	0	0	0.01	0	0	0	0	0	1e-05	0.001	0.001	1e-05	1e-05	1e-05	0.001
Mycoplasma salivarium	0	0	0	0	0	0	0	0	0	0.01	0	0	0	0	0	0	0	0	0	0	0	0	0	0	0	0	0	0	0	0	0	0	0	0	0	0	0	0	0	0	0	0	1e-05	0.001	1e-05	1e-05	1e-05	1e-05	0.001
Mycoplasma conjunctivae	0	0	0	0	0	0	0	0	0	0	0	0	0	0	0	0	0	0	0	0	0	0	0.01	0	0	0	0	0	0	0	0	0	0	0	0	0	0	0	0	0	0	0	1e-05	1e-05	1e-05	0.001	1e-05	1e-05	1e-05
Mycoplasma pneumoniae	0	0	0	0	0	0	0	0	0	0	0	0	0	0	0	0	0	0	0	0	0	0	0	0	0	0	0	0	0	0	0	0	0	0	0	0	0.01	0	0	0	0	0	1e-05	1e-05	1e-05	1e-05	0.002	1e-05	1e-05
Acholeplasma palmae	0	0	0	0	0	0	0	0	0	0	0	0	0	0	0	0	0	0	0	0	0	0	0	0	0	0	0	0	0	0	0	0	0	0	0	0	0	0	0.01	0	0	0	0.003	0.004	0.002	0.001	0.001	0.001	0.004
Deinococcus peraridilitoris	0	0	0.01	0	0	0	0	0	0	0	0	0	0	0	0	0	0	0	0	0	0	0	0	0	0	0	0	0	0	0	0	0	0	0	0	0	0	0	0	0	0	0	0.002	0.001	0.001	0.001	0.001	0.001	0.002
Pelolinea submarina	0	0	0	0	0	0	0	0	0	0	0	0	0	0	0	0	0	0	0	0	0	0	0	0	0	0	0	0	0	0	0	0	0	0	0	0	0	0	0.01	0	0	0	0.004	0.005	0.003	0.001	0.002	0.002	0.006
Chthonomonas calidirosea	0	0	0	0	0	0	0	0	0	0	0	0	0	0	0	0	0	0	0	0	0	0	0	0	0	0	0	0	0	0	0	0	0	0	0	0	0.01	0	0	0	0	0	0.001	0.005	0.001	0.001	1e-05	0.001	0.005
Chryseobacterium sp. H3001	0	0	0	0	0	0	0	0	0	0	0	0.01	0	0	0	0	0	0	0	0	0	0	0	0	0	0	0	0	0	0	0	0	0	0	0	0	0	0	0	0	0	0	0.001	0.007	0.001	0.003	0.006	1e-05	0.007
Polaribacter sp. BM10	0	0	0	0	0	0	0	0	0	0	0	0	0	0	0	0	0	0	0	0	0	0	0	0	0	0	0	0	0	0	0	0	0	0	0	0	0.01	0	0	0	0	0	0.001	0.002	0.001	0.001	0.001	1e-05	0.001
Flavobacteriaceae bacterium	0	0	0	0	0	0	0	0	0	0	0	0	0	0	0	0	0	0	0	0	0	0	0	0	0	0	0	0	0	0	0.01	0	0	0	0	0	0	0	0	0	0	0	0.001	0.002	0.002	0.002	0.007	0.001	0.002
Aquimarina sp. AD10	0	0	0	0	0	0	0	0	0	0	0	0.01	0	0	0	0	0	0	0	0	0	0	0	0	0	0	0	0	0	0	0	0	0	0	0	0	0	0	0	0	0	0	0.003	0.004	0.006	0.003	0.002	0.003	0.004
Lutibacter profundi	0	0	0	0	0	0	0	0	0	0	0	0	0	0	0	0	0	0	0	0	0	0	0	0	0	0	0	0	0	0	0	0	0.01	0	0	0	0	0	0	0	0	0	0.002	0.004	0.003	0.003	0.003	0.002	0.003
Nonlabens sp. MB-3u-79	0	0	0	0	0	0	0	0	0	0	0	0	0	0	0	0	0	0	0	0	0	0	0	0	0	0	0	0	0	0	0	0	0	0	0	0	0.01	0	0	0	0	0	0.001	0.003	0.001	0.001	0.001	1e-05	0.002
Dokdonia sp. PRO95	0	0	0	0	0	0	0	0	0	0	0	0	0	0	0	0	0	0	0	0	0	0	0	0	0	0	0	0	0	0	0	0	0	0	0	0	0.01	0	0	0	0	0	0.002	0.001	1e-05	0.001	0.001	1e-05	0.001
Dokdonia sp. 4H-3-7-5	0	0	0	0	0	0	0	0	0	0	0	0	0	0	0	0	0	0	0	0	0	0	0	0	0	0	0	0	0	0	0	0	0	0	0	0	0.01	0	0	0	0	0	0.001	0.004	0.001	0.001	1e-05	1e-05	0.003
Formosa sp. PS13	0	0	0	0	0	0	0	0	0	0	0	0.01	0	0	0	0	0	0	0	0	0	0	0	0	0	0	0	0	0	0	0	0	0	0	0	0	0	0	0	0	0	0	0.002	0.003	0.002	0.003	0.005	0.001	0.002
Formosa sp. Hel3_A1_48	0	0	0	0	0	0	0	0	0	0	0	0	0	0	0	0	0	0	0	0	0	0	0	0	0	0	0	0	0	0	0	0	0	0	0	0	0.01	0	0	0	0	0	0.001	0.002	1e-05	0.002	0.002	1e-05	0.002
Fabibacter pacificus	0	0	0	0	0	0	0	0	0	0	0	0	0	0	0	0	0	0	0	0	0	0	0	0	0	0	0	0	0	0	0	0	0	0	0	0	0.01	0	0	0	0	0	0.003	0.007	0.003	0.002	0.003	0.001	0.008
Candidatus Cyclonatronum proteinivorum	0	0	0	0	0	0	0	0	0	0	0	0	0	0	0	0	0	0.01	0	0	0	0	0	0	0	0	0	0	0	0	0	0	0	0	0	0	0	0	0	0	0	0	0.003	0.004	0.001	0.002	0.004	0.001	0.005
Klebsiella sp. P1CD1	0	0	0	0	0	0	0	0	0	0	0	0	0	0	0	0.01	0	0	0	0	0	0	0	0	0	0	0	0	0	0	0	0	0	0	0	0	0	0	0	0	0	0	1e-05	1e-05	0.001	1e-05	0.001	1e-05	1e-05
Enterobacter cancerogenus	0	0	0	0	0	0	0	0	0	0	0	0	0	0	0	0.01	0	0	0	0	0	0	0	0	0	0	0	0	0	0	0	0	0	0	0	0	0	0	0	0	0	0	0.003	0.004	0.001	0.004	0.002	0.001	0.003
Enterobacter cloacae complex sp. ECNIH7	0	0	0	0	0	0	0	0	0	0	0	0	0	0	0	0.01	0	0	0	0	0	0	0	0	0	0	0	0	0	0	0	0	0	0	0	0	0	0	0	0	0	0	1e-05	1e-05	1e-05	0.004	0.001	1e-05	1e-05
Enterobacter sp. SA187	0	0	0	0	0	0	0	0	0	0	0	0	0	0	0	0.01	0	0	0	0	0	0	0	0	0	0	0	0	0	0	0	0	0	0	0	0	0	0	0	0	0	0	0.002	0.001	0.002	0.001	0.001	0.001	0.002
Enterobacter sp. Crenshaw	0	0	0	0	0	0	0	0	0	0	0	0	0	0	0	0	0	0	0	0	0	0	0.01	0	0	0	0	0	0	0	0	0	0	0	0	0	0	0	0	0	0	0	1e-05	1e-05	1e-05	1e-05	1e-05	1e-05	1e-05
Citrobacter rodentium	0	0	0	0	0	0	0	0	0	0	0	0	0	0	0	0.01	0	0	0	0	0	0	0	0	0	0	0	0	0	0	0	0	0	0	0	0	0	0	0	0	0	0	0.004	0.002	0.001	0.001	0.002	0.002	0.002
Citrobacter sp. SNU WT2	0	0	0	0	0	0	0	0	0	0	0	0	0	0	0	0.01	0	0	0	0	0	0	0	0	0	0	0	0	0	0	0	0	0	0	0	0	0	0	0	0	0	0	0.002	0.001	0.001	1e-05	0.001	1e-05	0.001
Citrobacter sp. CRE-46	0	0	0	0	0	0	0	0	0	0	0	0	0	0	0	0.01	0	0	0	0	0	0	0	0	0	0	0	0	0	0	0	0	0	0	0	0	0	0	0	0	0	0	1e-05	1e-05	1e-05	1e-05	1e-05	1e-05	1e-05
Enterobacteriaceae bacterium ENNIH1	0	0	0	0	0	0	0	0	0	0	0	0	0	0	0	0.01	0	0	0	0	0	0	0	0	0	0	0	0	0	0	0	0	0	0	0	0	0	0	0	0	0	0	0.001	0.002	0.001	1e-05	0.001	0.001	0.002
Kosakonia oryzae	0	0	0	0	0	0	0	0	0	0	0	0	0	0	0	0.01	0	0	0	0	0	0	0	0	0	0	0	0	0	0	0	0	0	0	0	0	0	0	0	0	0	0	0.001	0.001	0.001	0.001	0.001	1e-05	0.001
Leclercia sp. LSNIH3	0	0	0	0	0	0	0	0	0	0	0	0	0	0	0	0	0	0	0	0	0.01	0	0	0	0	0	0	0	0	0	0	0	0	0	0	0	0	0	0	0	0	0	1e-05	1e-05	1e-05	1e-05	0.002	1e-05	1e-05
Atlantibacter hermannii	0	0	0	0	0	0	0	0	0	0	0	0	0	0	0	0	0	0	0	0	0.01	0	0	0	0	0	0	0	0	0	0	0	0	0	0	0	0	0	0	0	0	0	0.001	0.001	0.001	0.001	1e-05	0.001	0.001
Yersinia pseudotuberculosis	0	0	0	0	0	0	0	0	0.01	0	0	0	0	0	0	0	0	0	0	0	0	0	0	0	0	0	0	0	0	0	0	0	0	0	0	0	0	0	0	0	0	0	0.001	0.001	0.001	0.001	1e-05	0.001	0.001
Nissabacter sp. SGAir0207	0	0	0	0	0	0	0	0	0	0	0	0	0	0	0	0	0	0	0	0	0.01	0	0	0	0	0	0	0	0	0	0	0	0	0	0	0	0	0	0	0	0	0	0.003	0.005	0.002	0.001	0.004	0.001	0.006
Xenorhabdus hominickii	0	0	0	0	0	0	0	0	0	0	0	0	0	0	0	0	0	0	0	0	0	0	0	0	0	0	0	0	0	0	0.01	0	0	0	0	0	0	0	0	0	0	0	0.001	0.002	1e-05	1e-05	1e-05	0.001	0.001
Pantoea alhagi	0	0	0	0	0	0	0	0	0	0	0	0	0	0	0	0	0	0	0	0	0	0	0	0	0	0	0	0	0	0	0	0	0	0	0	0	0.01	0	0	0	0	0	0.002	0.004	0.001	0.001	0.001	0.001	0.004
Tatumella ptyseos	0	0	0	0	0	0	0	0	0	0	0	0	0	0	0	0	0	0	0	0	0	0	0	0	0	0	0	0	0	0	0	0	0	0	0	0	0.01	0	0	0	0	0	0.001	0.002	0.002	0.001	0.001	0.001	0.002
Tatumella citrea	0	0	0	0	0	0	0	0	0	0	0	0	0	0	0	0	0	0	0	0	0	0	0	0	0	0	0	0	0	0	0	0	0	0	0	0	0.01	0	0	0	0	0	0.001	0.002	0.001	0.002	0.003	0.001	0.002
Dickeya sp. NCPPB 569	0	0	0	0	0	0	0	0	0	0.01	0	0	0	0	0	0	0	0	0	0	0	0	0	0	0	0	0	0	0	0	0	0	0	0	0	0	0	0	0	0	0	0	0.001	0.002	0.001	0.001	0.001	1e-05	0.002
Brenneria rubrifaciens	0	0	0	0	0	0	0	0	0	0.01	0	0	0	0	0	0	0	0	0	0	0	0	0	0	0	0	0	0	0	0	0	0	0	0	0	0	0	0	0	0	0	0	0.001	0.001	0.001	1e-05	0.001	1e-05	0.001
Actinobacillus porcitonsillarum	0	0	0	0	0	0	0	0	0	0	0	0	0	0	0	0	0	0.01	0	0	0	0	0	0	0	0	0	0	0	0	0	0	0	0	0	0	0	0	0	0	0	0	0.001	0.001	0.001	0.001	0.004	0.001	0.001
Aggregatibacter actinomycetemcomitans	0	0	0	0	0	0	0	0	0	0	0	0	0	0	0	0	0	0	0	0	0	0	0	0	0	0.01	0	0	0	0	0	0	0	0	0	0	0	0	0	0	0	0	0.001	0.005	0.003	0.001	0.002	0.003	0.004
Bibersteinia trehalosi	0	0	0	0	0	0	0	0	0	0	0	0	0	0	0	0	0	0	0	0	0	0	0	0	0	0	0	0	0	0	0	0	0	0	0	0	0.01	0	0	0	0	0	0.001	0.002	0.002	0.001	0.001	0.001	0.002
Avibacterium paragallinarum	0	0	0	0	0	0	0	0	0	0	0	0	0	0	0	0	0	0	0	0	0	0	0	0	0	0	0	0	0	0	0	0	0	0	0	0	0.01	0	0	0	0	0	0.001	0.004	0.001	0.001	0.001	1e-05	0.003
Pseudomonas monteilii	0	0	0	0	0	0.01	0	0	0	0	0	0	0	0	0	0	0	0	0	0	0	0	0	0	0	0	0	0	0	0	0	0	0	0	0	0	0	0	0	0	0	0	0.003	0.004	0.001	0.001	0.004	0.001	0.004
Pseudomonas knackmussii	0	0.01	0	0	0	0	0	0	0	0	0	0	0	0	0	0	0	0	0	0	0	0	0	0	0	0	0	0	0	0	0	0	0	0	0	0	0	0	0	0	0	0	0.002	0.002	0.002	0.003	0.005	0.001	0.003
Pseudomonas sp. DY-1	0	0	0	0	0	0	0	0	0	0	0	0	0	0	0	0	0	0	0	0	0	0	0	0	0	0	0	0	0	0	0	0	0	0	0	0	0.01	0	0	0	0	0	0.001	0.005	0.001	0.001	0.001	1e-05	0.005
Pseudomonas sp. M30-35	0	0	0	0	0	0	0	0	0	0	0	0	0	0	0	0	0	0.01	0	0	0	0	0	0	0	0	0	0	0	0	0	0	0	0	0	0	0	0	0	0	0	0	0.002	0.001	0.001	0.001	0.001	1e-05	0.001
Acinetobacter calcoaceticus	0	0	0	0	0	0	0	0	0	0	0	0	0	0	0	0	0	0	0	0	0	0	0	0	0	0	0	0.01	0	0	0	0	0	0	0	0	0	0	0	0	0	0	0.001	0.002	0.002	0.001	0.003	0.003	0.002
Acinetobacter cumulans	0	0	0	0	0	0	0	0	0	0	0	0	0	0	0	0	0	0.01	0	0	0	0	0	0	0	0	0	0	0	0	0	0	0	0	0	0	0	0	0	0	0	0	0.001	0.002	0.001	0.001	0.002	1e-05	0.001
Acinetobacter guillouiae	0	0	0	0	0	0	0	0	0	0	0	0	0	0	0	0	0	0	0	0	0	0	0	0	0	0	0	0	0	0	0	0	0	0	0	0	0.01	0	0	0	0	0	0.001	0.001	0.001	0.001	1e-05	1e-05	0.001
Acinetobacter oleivorans	0	0	0	0	0	0	0	0	0	0	0	0	0	0	0	0	0	0	0	0	0	0	0	0	0	0	0	0	0	0	0.01	0	0	0	0	0	0	0	0	0	0	0	1e-05	1e-05	1e-05	1e-05	0.001	1e-05	1e-05
Psychrobacter sp. P11G3	0	0	0	0	0	0	0	0	0	0	0	0	0	0	0	0	0	0	0	0	0	0	0	0	0	0	0	0	0	0	0	0	0	0	0	0	0.01	0	0	0	0	0	0.001	0.001	1e-05	0.002	0.001	1e-05	0.001
Psychrobacter sp. DAB_AL43B	0	0	0	0	0	0	0	0	0	0	0	0	0	0	0	0	0	0	0	0	0	0	0	0	0	0	0	0	0	0	0.01	0	0	0	0	0	0	0	0	0	0	0	1e-05	0.003	1e-05	1e-05	0.001	1e-05	0.001
Psychrobacter sp. P11G5	0	0	0	0	0	0	0	0	0	0	0	0	0	0	0	0	0	0.01	0	0	0	0	0	0	0	0	0	0	0	0	0	0	0	0	0	0	0	0	0	0	0	0	1e-05	0.001	1e-05	0.001	0.001	1e-05	1e-05
Moraxella bovis	0	0	0	0	0	0	0	0	0	0	0	0	0	0	0	0	0	0.01	0	0	0	0	0	0	0	0	0	0	0	0	0	0	0	0	0	0	0	0	0	0	0	0	0.002	0.001	0.002	0.001	0.002	0.001	0.001
Marinobacter sp. CP1	0	0	0	0	0	0	0	0	0	0	0	0	0	0	0	0	0	0	0	0	0	0	0	0	0	0	0	0	0	0	0	0	0	0	0	0	0.01	0	0	0	0	0	0.001	0.001	0.001	1e-05	0.001	1e-05	0.001
Alteromonas australica	0	0	0	0	0	0	0.01	0	0	0	0	0	0	0	0	0	0	0	0	0	0	0	0	0	0	0	0	0	0	0	0	0	0	0	0	0	0	0	0	0	0	0	0.001	0.002	0.001	0.001	0.002	0.001	0.002
Catenovulum sediminis	0	0	0	0	0	0	0	0	0	0	0	0	0	0	0	0	0	0	0	0	0	0	0	0	0	0	0	0	0	0	0.01	0	0	0	0	0	0	0	0	0	0	0	0.003	0.002	0.002	0.001	0.001	0.002	0.002
Lacimicrobium alkaliphilum	0	0	0	0	0	0	0	0	0	0	0	0.01	0	0	0	0	0	0	0	0	0	0	0	0	0	0	0	0	0	0	0	0	0	0	0	0	0	0	0	0	0	0	0.001	0.005	0.002	0.002	0.008	0.001	0.005
Shewanella algae	0	0	0	0	0	0	0	0	0	0.01	0	0	0	0	0	0	0	0	0	0	0	0	0	0	0	0	0	0	0	0	0	0	0	0	0	0	0	0	0	0	0	0	0.002	0.004	0.001	0.002	0.002	0.001	0.004
Pseudoalteromonas atlantica	0	0	0	0	0	0	0	0	0	0	0	0	0	0	0	0	0	0.01	0	0	0	0	0	0	0	0	0	0	0	0	0	0	0	0	0	0	0	0	0	0	0	0	0.001	0.003	0.001	0.001	0.004	0.001	0.004
Pseudoalteromonas sp. R3	0	0	0	0	0	0	0	0	0	0	0	0	0	0	0	0	0	0	0	0	0	0	0	0	0	0	0	0	0	0	0.01	0	0	0	0	0	0	0	0	0	0	0	0.002	0.003	0.002	0.001	0.002	0.001	0.002
Moritella viscosa	0	0	0	0	0	0	0	0	0	0	0	0	0	0	0	0	0	0	0	0	0	0	0	0	0	0	0	0	0	0	0.01	0	0	0	0	0	0	0	0	0	0	0	0.001	0.001	0.001	0.001	0.003	0.001	0.002
Ferrimonas balearica	0	0	0	0	0	0	0	0	0	0	0	0	0	0	0	0	0	0	0	0	0	0	0	0	0	0	0	0	0	0	0	0	0	0	0	0	0	0	0.01	0	0	0	0.002	0.003	0.001	0.002	0.001	0.001	0.004
Vibrio parahaemolyticus	0	0	0	0	0	0	0	0	0	0	0	0	0	0.01	0	0	0	0	0	0	0	0	0	0	0	0	0	0	0	0	0	0	0	0	0	0	0	0	0	0	0	0	0.004	0.009	0.002	0.002	0.006	0.002	0.009
Stenotrophomonas sp. ZAC14D2_NAIMI4_7	0	0	0	0	0	0	0	0	0	0	0	0	0	0	0	0	0	0	0	0	0	0	0	0	0	0	0	0	0	0	0	0	0	0	0	0	0.01	0	0	0	0	0	0.001	0.001	1e-05	1e-05	1e-05	1e-05	0.001
Stenotrophomonas sp. LM091	0	0	0	0	0	0	0	0	0	0	0	0	0	0	0	0	0	0	0	0	0	0	0	0	0	0	0	0	0	0	0	0.01	0	0	0	0	0	0	0	0	0	0	0.001	0.001	0.001	0.001	0.001	0.001	0.002
Lysobacter enzymogenes	0	0	0	0	0	0	0	0.01	0	0	0	0	0	0	0	0	0	0	0	0	0	0	0	0	0	0	0	0	0	0	0	0	0	0	0	0	0	0	0	0	0	0	0.004	0.005	0.002	0.002	0.003	0.001	0.007
Xylella fastidiosa	0	0	0	0	0	0	0	0	0	0	0	0	0	0	0	0	0	0	0	0	0	0	0	0	0	0	0	0	0	0	0.01	0	0	0	0	0	0	0	0	0	0	0	0.001	0.003	0.001	0.001	1e-05	0.001	0.004
Frateuria aurantia	0	0	0	0	0	0	0	0	0	0	0	0	0	0	0	0	0	0	0	0	0	0	0	0	0	0	0	0	0	0	0	0	0	0	0	0	0.01	0	0	0	0	0	0.002	0.006	1e-05	0.001	1e-05	0.001	0.006
Ahniella affigens	0	0	0	0	0	0	0	0	0	0.01	0	0	0	0	0	0	0	0	0	0	0	0	0	0	0	0	0	0	0	0	0	0	0	0	0	0	0	0	0	0	0	0	0.002	0.003	0.001	0.001	0.001	1e-05	0.003
Halomonas hydrothermalis	0	0	0	0	0	0	0	0	0	0	0	0	0	0	0	0	0	0	0	0	0	0	0	0	0	0	0	0	0	0	0	0	0	0	0	0	0.01	0	0	0	0	0	0.001	0.002	1e-05	0.001	0.001	1e-05	0.002
Halomonas sp. GFAJ-1	0	0	0	0	0	0	0	0	0	0	0	0	0	0	0	0	0	0	0	0	0	0	0	0	0	0	0	0	0	0	0.01	0	0	0	0	0	0	0	0	0	0	0	0.001	0.005	0.001	1e-05	0.001	0.001	0.005
Halomonas sp. KO116	0	0	0	0	0	0	0	0	0	0.01	0	0	0	0	0	0	0	0	0	0	0	0	0	0	0	0	0	0	0	0	0	0	0	0	0	0	0	0	0	0	0	0	0.001	0.007	0.001	0.001	0.001	0.001	0.007
Kushneria konosiri	0	0	0	0	0	0	0	0	0	0	0	0	0	0	0	0	0	0	0	0	0	0	0	0	0	0	0	0	0	0	0	0	0	0	0	0	0.01	0	0	0	0	0	0.001	0.001	0.001	0.001	0.001	0.001	0.001
Cobetia marina	0	0	0	0	0	0	0	0	0	0	0	0	0	0	0	0	0	0	0	0	0	0	0.01	0	0	0	0	0	0	0	0	0	0	0	0	0	0	0	0	0	0	0	1e-05	1e-05	1e-05	1e-05	1e-05	1e-05	1e-05
Marinomonas mediterranea	0	0	0	0	0	0	0	0	0	0	0	0	0	0	0	0	0	0.01	0	0	0	0	0	0	0	0	0	0	0	0	0	0	0	0	0	0	0	0	0	0	0	0	0.002	0.002	0.001	0.001	0.001	0.001	0.002
Marinomonas primoryensis	0	0	0	0	0	0	0	0	0	0	0	0	0	0	0	0	0	0	0	0	0	0	0	0	0	0	0	0	0	0	0	0	0	0	0	0	0.01	0	0	0	0	0	0.001	0.001	0.001	0.001	0.001	1e-05	0.001
Marinomonas posidonica	0	0	0	0	0	0	0	0	0	0	0	0	0	0	0	0	0	0	0	0	0	0	0	0	0	0	0	0	0	0	0	0	0	0	0	0	0.01	0	0	0	0	0	1e-05	0.006	1e-05	1e-05	1e-05	0.001	0.006
Oleispira antarctica	0	0	0	0	0	0	0	0	0	0	0	0	0	0	0	0	0	0	0	0	0	0	0	0	0	0	0	0	0	0	0	0	0	0	0	0	0.01	0	0	0	0	0	0.001	0.005	0.001	1e-05	1e-05	0.001	0.005
Alcanivorax xenomutans	0	0	0	0	0	0	0	0	0	0	0	0	0	0	0	0	0	0	0	0	0	0	0.01	0	0	0	0	0	0	0	0	0	0	0	0	0	0	0	0	0	0	0	0.003	0.001	1e-05	0.001	0.001	0.001	0.001
Alcanivorax dieselolei	0	0	0	0	0	0	0	0	0	0	0	0	0	0	0	0	0	0	0	0	0	0	0.01	0	0	0	0	0	0	0	0	0	0	0	0	0	0	0	0	0	0	0	0.001	0.002	0.001	0.001	0.001	0.001	0.003
Thiomicrorhabdus sp. G1	0	0	0	0	0	0	0	0	0	0	0	0	0	0	0	0	0	0	0	0	0	0	0	0	0	0	0	0	0	0	0	0	0	0	0	0	0.01	0	0	0	0	0	0.001	0.004	1e-05	0.001	0.001	0.001	0.004
Cycloclasticus zancles	0	0	0.01	0	0	0	0	0	0	0	0	0	0	0	0	0	0	0	0	0	0	0	0	0	0	0	0	0	0	0	0	0	0	0	0	0	0	0	0	0	0	0	1e-05	1e-05	1e-05	1e-05	0.001	1e-05	1e-05
Cycloclasticus sp. PY97N	0	0	0	0	0	0	0	0	0	0	0	0	0	0	0	0	0	0	0	0	0	0	0.01	0	0	0	0	0	0	0	0	0	0	0	0	0	0	0	0	0	0	0	1e-05	1e-05	1e-05	1e-05	1e-05	1e-05	1e-05
Nitrosococcus halophilus	0	0	0	0	0	0	0	0	0	0	0	0	0	0	0	0	0	0	0	0	0	0	0	0	0	0	0	0	0	0	0	0	0	0	0	0	0.01	0	0	0	0	0	0.001	0.003	1e-05	1e-05	0.001	1e-05	0.003
Allochromatium vinosum	0	0	0	0	0	0	0	0	0	0	0	0	0	0	0	0	0	0.01	0	0	0	0	0	0	0	0	0	0	0	0	0	0	0	0	0	0	0	0	0	0	0	0	0.002	0.005	0.003	0.002	0.002	0.001	0.005
Granulosicoccus antarcticus	0	0	0	0	0	0	0	0	0	0	0	0	0	0	0	0	0	0	0	0	0	0	0	0	0	0	0	0	0	0	0.01	0	0	0	0	0	0	0	0	0	0	0	0.001	0.006	0.001	0.001	0.001	1e-05	0.005
Woeseia oceani	0	0	0	0	0	0	0	0	0	0	0	0	0	0	0	0	0	0	0	0	0	0	0	0	0	0	0	0	0	0	0	0	0	0	0	0	0.01	0	0	0	0	0	0.002	0.004	0.001	0.001	0.001	0.001	0.005
Oceanimonas sp. GK1	0	0	0	0	0	0	0	0	0	0	0	0	0	0	0	0	0	0	0	0	0	0	0	0	0	0	0	0	0	0	0	0	0	0	0	0	0.01	0	0	0	0	0	0.002	0.005	0.002	0.002	0.001	0.002	0.005
Legionella fallonii	0	0	0	0	0	0	0	0	0	0	0	0	0	0	0	0	0	0.01	0	0	0	0	0	0	0	0	0	0	0	0	0	0	0	0	0	0	0	0	0	0	0	0	0.001	0.002	0.001	0.001	0.002	1e-05	0.001
[truncated: 2,010 more rows]
[truncated: 8 more columns]

## Sheet: Table S7
PATHWAY	H1-1	H1-2	H1-3	H1-4	H1-5	H1-6	H1-7	H2-1	H2-2	H2-3	H2-4	H2-5	H2-6	H2-7	H3-1	H3-2	H3-3	H3-4	H3-5	H3-6	H3-7	H4-1	H4-2	H4-3	H4-4	H4-5	H4-6	H4-7	H5-1	H5-2	H5-3	H5-4	H5-5	H5-6	H5-7	H6-1	H6-2	H6-3	H6-4	H6-5	H6-6	H6-7	VA1	VA2	VA3	VA4	VA5	VD1	VD2
[truncated: 764 more rows]
[truncated: 8 more columns]

[truncated: 2 more sheets: Table S8, Table S9]
